# Supplementary material for: Unraveling Plasmid Contributions to Phosphorus Acquisition in Soil Microbiomes
Source: Research Square preprint supplement (doi:10.21203/rs.3.rs-7644682/v1), 2025-11-05
Supplement: Supplementary file 1 [file cc29cb2d8bbbf6e34c0ed6b3.xlsx]

## Sheet: Table S1
Table S1. Public metagenomic datasets used in this study, including sequencing statistics, plasmid identification, and phosphorus availability per sample
									geNomad v1.8.0			PLASMe v1.1
Habitat	Corresponding nucleotides data	Sample type	Instrument	Input Read Pairs	Both Surviving Reads	Both Surviving Read Percent	Dropped Reads	Dropped Read Percent	Number of plasmids	Number of plasmids with P genes	Number of plasmids with P-acquisition genes	Number of plasmids	Number of plasmids with P genes	Number of plasmids with P-acquisition genes	Sample_name	Available soil P (mg/kg)	Method of P determination	Phosphorus_availability	Continent (Country)	Reference
Farmland	SRR28285725	Soil	HiSeq 2500 (2x150 PE)	112049388	110571984	98.68	52851	0.05	618	5	4	1852	103	70	AH.Fa5	107.06	Olsen-P	High	Asia (China)	Liang, J. L., Feng, S. W., Lu, J. L., Wang, X. N., Li, F. L., Guo, Y. Q., Liu, S. Y., Zhuang, Y. Y., Zhong, S. J., Zheng, J., Wen, P., Yi, X., Jia, P., Liao, B., Shu, W. S., & Li, J. T. (2024). Hidden diversity and potential ecological function of phosphorus acquisition genes in widespread terrestrial bacteriophages. Nature communications, 15(1), 2827. https://doi.org/10.1038/s41467-024-47214-7
	SRR28285724	Soil		130381257	128227326	98.35	81856	0.06	988	11	5	1920	153	105	AH.Fa7	107.06	Olsen-P	High
	SRR28285644	Soil		103951955	102025864	98.15	65843	0.06	679	3	1	1261	74	54	AH.Fa9	107.06	Olsen-P	High
	SRR28285646	Soil		98404535	96951051	98.52	54979	0.06	354	5	2	1189	102	62	GS.Fa5	60.47	Olsen-P	High
	SRR28401909	Soil		105029936	103504397	98.55	56732	0.05	405	18	11	1140	96	65	GS.Fa6	60.47	Olsen-P	High
	SRR28401908	Soil		112714962	110841109	98.34	67206	0.06	924	17	7	2263	151	82	GS.Fa7	60.47	Olsen-P	High
	SRR28401767	Soil		97846191	96406761	98.53	73047	0.07	1665	26	17	1702	96	60	GZ.Fa10	31.53	Olsen-P	High
	SRR28401756	Soil		90676555	89370368	98.56	64666	0.07	332	1	0	1392	102	75	GZ.Fa5	31.53	Olsen-P	High
	SRR28401745	Soil		90574986	89290242	98.58	64492	0.07	2189	27	17	2010	111	78	GZ.Fa7	31.53	Olsen-P	High
	SRR28401896	Soil		92472347	91011226	98.42	79251	0.09	1495	51	28	3467	206	109	HLJ.Fa5	125.10	Olsen-P	High
	SRR28401885	Soil		102311647	100524108	98.25	85791	0.08	398	4	3	1535	122	71	HLJ.Fa7	125.10	Olsen-P	High
	SRR28401840	Soil		99204180	97456232	98.24	85818	0.09	513	13	5	1817	106	69	HLJ.Fa9	125.10	Olsen-P	High
	SRR28401829	Soil		92172758	90757975	98.47	70782	0.08	717	4	2	1648	80	50	HuB.Fa10	61.18	Olsen-P	High
	SRR28401818	Soil		108089384	106421116	98.46	82864	0.08	911	15	9	2427	144	99	HuB.Fa5	61.18	Olsen-P	High
	SRR28401875	Soil		92407193	90988946	98.47	70699	0.08	636	8	3	1630	102	71	HuB.Fa6	61.18	Olsen-P	High
Grassland	SRR28401843	Soil		98444006	96680872	98.21	84192	0.09	572	4	1	1525	70	51	XZ.Gr7	6.63	Olsen-P	Low
	SRR28401877	Soil		98489391	97037092	98.53	72842	0.07	384	3	2	1709	115	78	XZ.Gr5	6.63	Olsen-P	Low
	SRR28401878	Soil		88368039	86729935	98.15	81038	0.09	787	4	1	1284	79	48	XZ.Gr10	6.63	Olsen-P	Low
	SRR28401879	Soil		95557641	93872980	98.24	91048	0.10	397	2	1	1786	104	68	XJ.Gr8	17.84	Olsen-P	Low
	SRR28401880	Soil		98956612	97338389	98.36	84726	0.09	606	15	11	2477	162	102	XJ.Gr7	17.84	Olsen-P	Low
	SRR28401881	Soil		89393953	87954854	98.39	73097	0.08	387	2	2	1211	97	63	XJ.Gr5	17.84	Olsen-P	Low
	SRR28401882	Soil		91402571	89803721	98.25	86321	0.09	202	1	0	1013	85	57	XJ.Gr16	4.68	Olsen-P	Low
	SRR28401883	Soil		111460317	109560350	98.30	98185	0.09	957	10	4	1662	94	61	XJ.Gr15	4.68	Olsen-P	Low
	SRR28401884	Soil		103411200	100843481	97.52	124168	0.12	1532	12	6	1135	82	61	SC.Gr7	2.51	Olsen-P	Low
	SRR28401886	Soil		104342103	102470226	98.21	92827	0.09	1019	14	9	1350	94	68	SC.Gr5	2.51	Olsen-P	Low
	SRR28401887	Soil		88137217	86588853	98.24	75266	0.09	1029	8	6	1050	86	60	SC.Gr10	2.51	Olsen-P	Low
	SRR28401888	Soil		90573492	89382313	98.68	41792	0.05	162	2	1	702	47	36	QH.Gr7	5.59	Olsen-P	Low
	SRR28401889	Soil		69255458	67715929	97.78	60503	0.09	473	18	12	921	48	34	QH.Gr6	5.59	Olsen-P	Low
	SRR28401890	Soil		84421444	83371009	98.76	45379	0.05	282	18	12	855	90	60	QH.Gr10	5.59	Olsen-P	Low
	SRR28401891	Soil		70749042	69615706	98.40	60158	0.09	385	1	0	1159	79	61	HeB.Gr8	1.86	Olsen-P	Low
	SRR28401892	Soil		90265427	88674447	98.24	75331	0.08	539	7	4	1287	82	53	HeB.Gr6	1.86	Olsen-P	Low
	SRR28401893	Soil		89045207	87501958	98.27	70065	0.08	660	8	5	1815	121	76	HeB.Gr10	1.86	Olsen-P	Low
	SRR28285604	Soil		81684216	80400250	98.43	61726	0.08	2055	40	24	2587	124	64	XJ.Gr20	4.68	Olsen-P	Low
	SRR28285605	Soil		115589366	113535574	98.22	98643	0.09	2185	28	15	2063	126	88	NM.Gr9	4.06	Olsen-P	Low
	SRR28285606	Soil		86999748	85416171	98.18	79040	0.09	1390	20	12	1351	69	53	NM.Gr8	4.06	Olsen-P	Low
	SRR28285607	Soil		89307347	87710833	98.21	75208	0.08	1722	17	10	1542	93	58	NM.Gr7	4.06	Olsen-P	Low
	SRR28285608	Soil		93639625	91890145	98.13	86296	0.09	650	10	9	2543	181	114	NM.Gr30	1.65	Olsen-P	Low
	SRR28285609	Soil		89528108	87804575	98.07	85620	0.10	936	17	8	2059	136	87	NM.Gr28	1.65	Olsen-P	Low
	SRR28285610	Soil		88884313	87167528	98.07	84616	0.10	888	11	5	2035	153	89	NM.Gr25	1.65	Olsen-P	Low
	SRR28285612	Soil		89903810	88192844	98.10	86397	0.10	1194	17	12	1468	81	49	NM.Gr20	4.06	Olsen-P	Low
	SRR28285613	Soil		89910822	88195470	98.09	85874	0.10	1206	9	7	1315	72	45	NM.Gr18	4.06	Olsen-P	Low
	SRR28285614	Soil		93823693	92408246	98.49	72142	0.08	847	12	10	1364	69	45	NM.Gr16	4.06	Olsen-P	Low
Desert	SRR28401894	Soil		84095713	82334992	97.91	64706	0.08	930	13	9	1907	65	34	XJ.Go8	23.43	Olsen-P	Low
	SRR28401895	Soil		78432520	76017043	96.92	82093	0.10	91	1	1	246	13	4	XJ.Go5	23.43	Olsen-P	Low
	SRR28401897	Soil		88154115	86498907	98.12	89958	0.10	739	3	0	1677	87	58	XJ.Go20	3.37	Olsen-P	Low
	SRR28401898	Soil		91635152	90083994	98.31	83060	0.09	720	6	2	1608	73	53	XJ.Go18	3.37	Olsen-P	Low
	SRR28401899	Soil		97095218	95555405	98.41	76478	0.08	946	5	2	2165	106	63	XJ.Go15	3.37	Olsen-P	Low
	SRR28401900	Soil		94826427	92225959	97.26	114180	0.12	941	25	16	349	20	16	XJ.Go10	23.43	Olsen-P	Low
	SRR28401901	Soil		92419611	90666422	98.10	88335	0.10	6614	67	38	2724	98	65	QH.Go7	1.65	Olsen-P	Low
	SRR28401902	Soil		108047261	105601909	97.74	127752	0.12	3472	22	14	3612	181	84	QH.Go3	1.65	Olsen-P	Low
	SRR28401903	Soil		87382579	86102083	98.53	64617	0.07	3053	34	22	667	16	7	QH.Go1	1.65	Olsen-P	Low
	SRR28401904	Soil		101507704	98742994	97.28	135047	0.13	2288	24	9	2439	117	70	GS.Go9	8.15	Olsen-P	Low
	SRR28401905	Soil		101741335	99030987	97.34	132077	0.13	2614	31	20	3596	193	104	GS.Go8	8.15	Olsen-P	Low
	SRR28401906	Soil		105351550	103883086	98.61	47694	0.05	2598	38	23	3679	207	119	GS.Go5	8.15	Olsen-P	Low
Tundra	SRR6429830	Soil	Illumina MiSeq (2x300 PE)	2750394	2282799	83.00	93534	3.40	36	1	0	41	0	0	Cq+Da replicate 3	33.9 ± 2.8	NA	High	Antarctic	Molina-Montenegro, M.A., Ballesteros, G.I., Castro-Nallar, E. et al. A first insight into the structure and function of rhizosphere microbiota in Antarctic plants using shotgun metagenomic. Polar Biol 42, 1825–1835 (2019). https://doi.org/10.1007/s00300-019-02556-7
	SRR6429831	Soil		3208209	2715261	84.63	107164	3.34	69	0	0	49	4	2	Cq+Da replicate 2	33.9 ± 2.8	NA	High
	SRR6429832	Soil		3715503	3120646	83.99	122146	3.29	58	1	0	66	3	0	Cq+Da replicate 1	33.9 ± 2.8	NA	High
	SRR6429833	Soil		3290829	2849957	86.60	93278	2.83	62	0	0	75	0	0	Cq replicate 3	35.2 ± 2.1	NA	High
	SRR6429834	Soil		3363848	2918032	86.75	100255	2.98	75	0	0	76	1	1	Cq replicate 2	35.2 ± 2.1	NA	High
	SRR6429835	Soil		3386208	2918731	86.19	102642	3.03	56	1	1	67	2	1	Cq replicate 1	35.2 ± 2.1	NA	High
	ERR4182668	Soil	HiSeq 2500 (2x150 PE)	39008644	35975849	92.23	433318	1.11	2490	59	31	1453	29	14	Ag_LI	155.29 ± 65.48	Bray-P	High		Ramírez-Fernández, L., Orellana, L. H., Johnston, E. R., Konstantinidis, K. T., & Orlando, J. (2021). Diversity of microbial communities and genes involved in nitrous oxide emissions in Antarctic soils impacted by marine animals as revealed by metagenomics and 100 metagenome-assembled genomes. The Science of the total environment, 788, 147693. https://doi.org/10.1016/j.scitotenv.2021.147693
	ERR4182669	Soil		25378515	23099195	91.02	293268	1.16	1018	34	23	855	25	9	Ag_KGI	18.13 ± 1.42	Bray-P	Low
	ERR4182670	Soil		40032579	36716258	91.72	459176	1.15	1189	30	22	1173	34	16	Ml_LI	437.22 ± 122.91	Bray-P	High
	ERR4182673	Soil		26462225	24021927	90.78	323045	1.22	248	2	1	534	17	8	Ml_KGI	13.63 ± 4.47	Bray-P	Low
	ERR4183043	Soil		28363761	25802683	90.97	379430	1.34	316	5	3	367	15	11	Ct_LI	14.16 ± 2.61	Bray-P	Low
	ERR4183044	Soil		26468550	24158390	91.27	305710	1.15	250	2	0	326	22	19	Ct_KGI	0.78 ± 3.64	Bray-P	Low
	ERR4183116	Soil		33525274	30503996	90.99	404539	1.21	473	7	5	432	11	2	Pp_LI	1746.38 ± 179.17	Bray-P	High
	ERR4183117	Soil		27120106	24477722	90.26	330360	1.22	827	24	9	517	11	1	Pp_KGI	585.69 ± 136.19	Bray-P	High
	ERR4183124	Soil		33986359	31521070	92.75	334484	0.98	1275	24	11	768	13	4	Ld_LI	259.00 ± 95.52	Bray-P	High
	ERR4183125	Soil		25443039	22691962	89.19	351937	1.38	699	17	8	359	15	2	Ld_KGI	1830.79 ± 169.27	Bray-P	High
Volcanic	SRR11271801	Soil	Illumina MiSeq (2x300 PE)	8103173	7059471	87.12	135670	1.67	73	0	0	215	18	14	Soil_1751	6.00 ± 1.00	Olsen-P	Low	South America (Chile)	Hernández, M., Vera-Gargallo, B., Calabi-Floody, M., King, G. M., Conrad, R., & Tebbe, C. C. (2020). Reconstructing Genomes of Carbon Monoxide Oxidisers in Volcanic Deposits Including Members of the Class Ktedonobacteria. Microorganisms, 8(12), 1880. https://doi.org/10.3390/microorganisms8121880
	SRR11271802	Soil		9434658	8623030	91.40	125659	1.33	299	2	2	728	38	27	Soil_1751	6.00 ± 1.00	Olsen-P	Low
	SRR11271803	Soil		8571954	7854181	91.63	106790	1.25	179	2	2	675	45	30	Soil_1640	7.67 ± 1.53	Olsen-P	Low
	SRR11271804	Soil		9426833	8631833	91.57	119149	1.26	602	9	6	1001	54	34	Soil_1640	7.67 ± 1.53	Olsen-P	Low
	SRR11271805	Soil		9025198	7661605	84.89	172152	1.91	587	9	5	317	16	11	Soil_1957	7.67 ± 1.15	Olsen-P	Low
	SRR11271806	Soil		8446959	7178935	84.99	162833	1.93	724	12	10	330	24	9	Soil_1957	7.67 ± 1.15	Olsen-P	Low
	SRR11271807	Soil		9544119	7980615	83.62	179685	1.88	352	3	2	314	26	13	Soil_1957	7.67 ± 1.15	Olsen-P	Low
	SRR11271808	Soil		8776594	7591056	86.49	152440	1.74	401	13	9	335	17	10	Soil_1751	6.00 ± 1.00	Olsen-P	Low
	SRR11271809	Soil		7290790	6642133	91.10	94750	1.30	86	0	0	377	18	11	Soil_1640	7.67 ± 1.53	Olsen-P	Low
Mine	ERR3200791	Soil	HiSeq X Ten and Illumina HiSeq 2500 (2x250 PE, 2x150 PE)	113555710	96855965	85.29	2151062	1.89	1152	32	24	2257	135	82	ALRT4_1	7.29 ± 0.14	Olsen-P	Low	Asia (China)	Liang, J. L., Liu, J., Jia, P., Yang, T. T., Zeng, Q. W., Zhang, S. C., Liao, B., Shu, W. S., & Li, J. T. (2020). Novel phosphate-solubilizing bacteria enhance soil phosphorus cycling following ecological restoration of land degraded by mining. The ISME journal, 14(6), 1600–1613. https://doi.org/10.1038/s41396-020-0632-4
	ERR3200792	Soil		106829581	92489386	86.58	1812624	1.70	772	16	15	1626	105	55	ALRT4_2	7.29 ± 0.14	Olsen-P	Low
	ERR3200793	Soil		108551277	94818831	87.35	1871372	1.72	890	21	16	1991	120	84	ALRT4_3	7.29 ± 0.14	Olsen-P	Low
	ERR3200794	Soil		99683943	87986369	88.27	1552252	1.56	2017	17	6	565	17	9	ULRT4_1	6.42 ± 1.17	Olsen-P	Low
	ERR3200795	Soil		112628291	99389369	88.25	1791539	1.59	4508	145	95	2449	111	41	ULRT4_2	6.42 ± 1.17	Olsen-P	Low
	ERR3200796	Soil		96027531	84389621	87.88	1622362	1.69	4434	125	90	2542	117	68	ULRT4_3	6.42 ± 1.17	Olsen-P	Low
	ERR3200797	Soil		104073606	93472802	89.81	1580007	1.52	1925	7	3	351	7	3	UT4_1	2.64 ± 0.10	Olsen-P	Low
	ERR3200798	Soil		108120580	96260862	89.03	1716096	1.59	1756	8	4	445	9	2	UT4_2	2.64 ± 0.10	Olsen-P	Low
	ERR3200799	Soil		109406744	98183914	89.74	1738785	1.59	2367	12	3	465	5	1	UT4_3	2.64 ± 0.10	Olsen-P	Low
	ERR3200800	Soil		54968990	51160380	93.07	562822	1.02	866	21	16	2142	135	89	ALRT3_1	7.12 ± 0.21	Olsen-P	Low
	ERR3200801	Soil		50820280	47308938	93.09	518166	1.02	1033	20	16	2298	130	75	ALRT3_2	7.12 ± 0.21	Olsen-P	Low
	ERR3200803	Soil		129316054	116135181	89.81	1793318	1.39	4793	121	70	3041	122	59	ULRT3_1	7.13 ± 0.36	Olsen-P	Low
	ERR3200804	Soil		84433377	79209525	93.81	695050	0.82	5495	104	64	4097	161	72	ULRT3_2	7.13 ± 0.36	Olsen-P	Low
	ERR3200805	Soil		90943886	71627305	78.76	3957578	4.35	4684	75	46	3068	108	57	ULRT3_3	7.13 ± 0.36	Olsen-P	Low
	ERR3200806	Soil		129531436	124992637	96.50	702774	0.54	1396	16	5	502	10	3	UT3_1	2.87 ± 0.05	Olsen-P	Low
	ERR3200807	Soil		78983773	76000494	96.22	519725	0.66	1335	10	5	494	11	5	UT3_2	2.87 ± 0.05	Olsen-P	Low
	ERR3200808	Soil		100165312	96188694	96.03	688000	0.69	1731	36	22	903	37	13	UT3_3	2.87 ± 0.05	Olsen-P	Low
									114874	1830	1109	133876	7361	4493

## Sheet: Table S2
Table S2. Genomic annotation and metadata of soil-derived plasmids from PLSDB, including plasmid characteristics, taxonomic classification, and phosphorus-related gene content.
NUCCORE_ACC	length	GC	tRNAs	tmRNAs	rRNAs	CDSs	pseudogenes	hypotheticals	signal_peptides	sORFs	gaps	oriCs	oriVs	oriTs	genes	P-acquisition_genes	Phosphorus_Genes_PCycDB	NUCCORE_CreateDate	NUCCORE_GC	BIOSAMPLE_Host	BIOSAMPLE_Host_processed	BIOSAMPLE_IsolationSource	NUCCORE_Length	BIOSAMPLE_Location	BIOSAMPLE_SampleType	NUCCORE_Topology	loc_lat	loc_lng	loc_parsed	plasmidfinder	pmlst	TAXONOMY_class	TAXONOMY_family	TAXONOMY_genus	TAXONOMY_taxon_name	TAXONOMY_order	TAXONOMY_phylum	TAXONOMY_species	TAXONOMY_strain	TAXONOMY_superkingdom	D1	D2	HOST_ACC	host_GC	class	mobility	bakta_gene_count	PCycDB_count
CP015592.1	459971	33.1	3	0	0	396	19	73	0	1	0	0	0	0	tnpB, traM, traM, lepB, tnpA, tnpB, ushA, tnpB, clfA, yhcF, rimL, tar, vanR, vanS, vanZ, xerS, gadA, bcsA, tetR, galU, cotS, tnpA, tnp, colA, araJ, acrR, arsR, acrR, sdaC, sdaAA, sdaAB, grpB, tetR, tetR, tetR, tnp, traX, yxdL, ltrA, cdiI, arpU, recU, tnp, grsT, sfp, solG, dltA, yxeA, lysR, rhaT, ampC, ampC, bceA, arpU, recU, tnp, tetR, trnV, xerD, trnV, mutT, asnB, gntR, azlC, azlD, bla, trnI, ly…		RegX3, phoB, spoT	2016-11-17	0.3310099984564244			garden soil	459971	China	whole organism	circular	344118455	860326902	China			Bacilli (91061)	Bacillaceae (186817)	Bacillus (1386)	Bacillus cereus	Bacillales (1385)	Bacillota (1239)	Bacillus_cereus (1396)		Bacteria (2)	-2.35307e+16	-4623557599999990	GCA_001880305.1	35.5	MOBL	mobilizable	0	3
CP016195.1	317818	33.3	1	0	0	294	9	48	0	1	0	0	0	0	padR, tnp, bla, brnQ, abrB, yxeA, yxeA, yxdL, fbpA, tnp, vanY, capA, ltrA, yxeA, trnI, msmK, lacI, hfq, brnQ, istB, istA, orfA, malK, fliB, tnp, tnp, ftsK, ltrA, abrB, ligA, rocF, ssb, abrB, arsR, yxeA, tnp, gntR, sdpA, ftsN, gltP		ugpC, ugpC, phoB	2016-06-23	0.3332127192292444			soil sample	317818	China: Sichuan Basin	organism	circular	30.5	105.5	China,Sichuan Basin			Bacilli (91061)	Bacillaceae (186817)	Bacillus (1386)	Bacillus thuringiensis	Bacillales (1385)	Bacillota (1239)	Bacillus_thuringiensis (1428)		Bacteria (2)	-24175985	-46648803	GCA_001675515.1	35.3	MOBL	mobilizable	0	3
CP017422.1	288370	61.9	0	0	0	312	2	76	0	0	0	0	0	0	crcB, fluC, tniQ, lspA, ccdA, trkG, resB, ctaG, ctaG, czcD, dsbC, copC, lspA, arsR, virD4, trbL, flhG, irrE, marR, parA, merR, merA, istB, istA, tniQ, gntR, gntR, parB, satD, tnp, 6-hdno, modC, modB, modA, moaC, glp, moaA, moaD, istB, istA, ndhM, ndhS, 6-hlno, tnp, kdhB, kdhA, cdaR, kdhC, dhpH, pmfR, purU, abo, nepA, nepB, mao, tnp, gntR, fbpB, dedA, atpE, dedA, pspE, frmR, lgt, tlpA, lgt, ccdA		ugpC, RegX3	2016-10-26	0.6192218330616915			soil	288370	China: Jilin Pesticide Plant	whole organism	circular	429995032	1259816054	China,Jilin			Actinomycetes (1760)	Micrococcaceae (1268)	Arthrobacter (1663)	Arthrobacter sp. ZXY-2	Micrococcales (85006)	Actinomycetota (201174)	Arthrobacter_sp._ZXY-2 (1806905)		Bacteria (2)	6483905	-27172298	GCA_001854365.1	63.6	non-mob	non-mob	0	2
CP024685.1	490693	32.6	1	0	0	433	13	57	0	1	0	0	0	0	rfbG, wcaG, rfbF, gerAC, gerAB, gerAA, eda, kduI, kduD, galM, galK, galT, ureA, ureB, ureC, 5_ureB_sRNA, ureE, ureF, ureG, ureD, ureI, hoxN, xerS, mgtE, cDA1, qdoI, arsR, gerAC, gadA, dAP2, tetR, yqfW, ribD, ribA, hxlR, tnp, ampC, ybfO, colA, lolD, lolD, vanS, vanR, arsR, tnp, blaIII, eamA, gntR, rimI, acrR, ampS, phzF, rocF, bsrC, carD, tetR, merR, cdiI, arpU, recU, recU, tnpB, vanS, vanR, yndA,…		RegX3, phoB, spoT	2018-12-06	0.3264688919548475			soil	490693	Argentina: Buenos Aires	cell culture	circular	-3.46076e+16	-58437076	Argentina,Buenos Aires			Bacilli (91061)	Bacillaceae (186817)	Bacillus (1386)	Bacillus wiedmannii	Bacillales (1385)	Bacillota (1239)	Bacillus_wiedmannii (1890302)		Bacteria (2)	-23547685	-4632722	GCA_003866015.1	35.5	MOBL	mobilizable	0	3
CP024686.1	313432	32.5	0	0	0	280	4	34	0	0	0	0	0	0	traM, aimR, araC, adhE, nrdG, nrdD, ald, tdcB, potE, scfB, lysR, hfq, tnp, umuC, sulP, ftsK, ald, tdcB, graR, vanR, lolD, fosB, argR, arcA, arcD, arcC, manA, mmuP, mmuM, arsR, ahpD, fabZ, fabF, rfbA, rfbC, rfbB, rfbD, xerS, folE, queE, queD, queC, lmbE, yxeA, rodA, ftsI, rpoE, tnp, merR, manZ, manY, dhaL, dhaK, gldA, lolD, lolD, copG, copG, merR, virB4, traM		nrdD, phoB, RegX3, phoB, phoR, dut	2018-12-06	0.3246158656423084			soil	313432	Argentina: Buenos Aires	cell culture	circular	-3.46076e+16	-58437076	Argentina,Buenos Aires			Bacilli (91061)	Bacillaceae (186817)	Bacillus (1386)	Bacillus wiedmannii	Bacillales (1385)	Bacillota (1239)	Bacillus_wiedmannii (1890302)		Bacteria (2)	-25249934	-4594894999999990	GCA_003866015.1	35.5	MOBL	mobilizable	0	6
CP031365.1	318607	58.8	0	0	0	354	4	69	0	0	0	0	1	0	csa3, ar15, parB, argG, ardC, slyX, lysR, phnG, phnH, phnI, phnJ, traG, traD, traC, traA, traF, traB, Atu_Ti1, traH, hipB, trbH, trbG, trbF, trbL, trbK, trbJ, virB4, trbD, trbC, trbB, repA, repB, ctRNA_p42d, repC, lysR, adhP, csa3, zitB, merR, lspA, cyoA, cyoB, cyoC, cyoD, tnpA, rve, yncE, copZ, cueR, rve, lspA, mlaD, dedA, nrfE, arsR, arsN2, arsB, arsC, arsH, arsK, xerD, xerD, xerD, dnaE, dinP, …	phnG, phnH, phnI, phnJ	phnG, phnH, phnI, phnJ, phnK, phoB, phoR	2021-03-16	0.5881571967973083			soil	318607	China	cell culture	circular	344118455	860326902	China			Alphaproteobacteria (28211)	Rhizobiaceae (82115)	Rhizobium (379)	Rhizobium sp. ZX09	Hyphomicrobiales (356)	Pseudomonadota (1224)	Rhizobium_sp._ZX09 (2291939)		Bacteria (2)	6.61222e+16	-47686677	GCA_017357485.1	59.3	MOBQ	mobilizable	4	7
CP036488.1	525842	52.1	0	0	0	483	2	27	0	1	0	0	0	0	srfB, srfC, fbaB, yajL, acrR, dnaK, dnaJ, dnaJ, amyA, proP, tolB, qdoI, rpiB, kduD, araC, acrA, acrB, iscR, tetR, fabG, araC, ovoA, fimB, pAS, tar, tssB, tssC, tssK, tssL, hcp, tssH, tssA, vgrG1, tssF, tssG, tssJ, tssE, tssA1, appC, cydB, acrR, araJ, ddpA, dppD, dppD, dppC, dppB, citB, menH, araC, araJ, appC, cydB, fadR, fabG, ycgM, rspA, fabG, rhaM, fucP, arsR, aCTx2, hmoA, metE, yceI, hDGYP, ca…	gcd, gcd	ugpC, gcd, RegX3	2019-03-06	0.5211565451219188			Rice-wheat rotation soil	525842	China: Hubei	cell culture	circular	31.0	112.0	China,Hubei			Gammaproteobacteria (1236)	Yersiniaceae (1903411)	Rahnella (34037)	Rahnella aquatilis	Enterobacterales (91347)	Pseudomonadota (1224)	Rahnella_aquatilis (34038)		Bacteria (2)	27356713	0.44420135	GCA_004328445.1	52.3	MOBF	mobilizable	2	3
CP037991.1	483686	33.6	0	0	0	503	41	84	0	0	0	0	0	0	alr, tetR, ykkD, ftsW, mgtE, nAGPA, ftsN, phoP, mutT, xerS, sepF, hhoA, mmuM, mmuP, czcR, tnpB, tnp, ftsK, splB, splA, ymfJ, mmpL, ahpD, arpU, fbpA, hfq, padR, yjcZ, bsrC, carD, czcR, arsR, bsrC, carD, pseI, pseH, pseG, pseC, arpU, tnp, traM, traG, ftsK, traG, dinB, pseC, rsfA, orfB, tnp, mutT, fbpA, copG, gerPA, arpU, acrR, asnB, herA, eamA, hfq, deoR, tar, mgtE, tnpC, fadH2, hfq, orfB, tnp, amp…	phoP	phoB, phoB, phoR, dut, phoP	2019-03-25	0.3355896180579963			soil core	483686	USA: Alaska, Fairbanks		circular	64875646	-147668981				Bacilli (91061)	Bacillaceae (186817)	Bacillus (1386)	Bacillus mycoides	Bacillales (1385)	Bacillota (1239)	Bacillus_mycoides (1405)		Bacteria (2)	-2.12113e+16	-4600475299999990	GCA_004367995.1	35.6	MOBL	mobilizable	1	5
CP041205.1	730230	57.3	0	0	0	710	6	112	0	0	0	0	0	0	sfnG, msuE, lysR, tetR, tolA, cspC, hlyD, bapA, tolC, rhtB, mviM, glnQ, repA, repB, ctRNA_p42d, repC, lysR, lysR, gloA, yqjQ, lysR, hpaI, hpaH, gntR, istA, istB, lprI, lprI, lprI, gfa, frmA, lysR, alkB, lysR, yceI, iclR, maiA, ugpC, lacI, lysR, catC, catA, pcaD, lysR, doxX, lysR, lysR, doxX, lysR, iclR, pcaF, gntR, oppF, betA, nolF, marR, hmoA, araC, nthA, fixA, pcaF, maoC, ssuD, nmrA, lysR, gntR…	ugpC, ugpB, ugpA, ugpE	ugpC, RegX3, ugpC, ugpC, ugpC, ugpC	2019-07-01	0.5734234419292552			Coal mine soil	730230	South Korea: Gangwon-do	Genome assembly	circular	37885	1277297	South Korea,Gangwon-do			Alphaproteobacteria (28211)	Rhizobiaceae (82115)	Rhizobium (379)	Rhizobium sp. NIBRBAC000502774	Hyphomicrobiales (356)	Pseudomonadota (1224)	Rhizobium_sp._NIBRBAC000502774 (2590777)		Bacteria (2)	6525941400000000	-515013	GCA_006517835.1	58.9	MOBQ	mobilizable	4	6
CP042210.1	134338	40.4	0	0	0	155	8	20	0	0	0	0	1	0	tnp, tnp, tnp, tnp, frmR, fghA, gldA, higB, copG, hlyD, tnp, tnp, tnp, tnp, iacB, hcaE, fabG, oprD, feaR, marR, tnp, hicB, csuD, tnp, tnp, tnp, tnp, tnp, tnp, tnp, tnp, tatC, tatB, tatA, tnsE, hipA, tnp, ibpA, yfdX, hdeD-GI, trxLHR, tnp, yddG		phoA	2019-08-02	0.40398100314133			soil	134338	India: Anantpur, Andhra Pradesh	Whole organism	circular	1.58333e+16	79.75	India,Anantpur,Andhra Pradesh			Gammaproteobacteria (1236)	Moraxellaceae (468)	Acinetobacter (469)	Acinetobacter baumannii	Moraxellales (2887326)	Pseudomonadota (1224)	Acinetobacter_baumannii (470)		Bacteria (2)	10001376	-8525934	GCA_003012895.3	39.2	non-mob	non-mob	0	1
CP052064.1	552228	32.9	1	0	0	442	9	79	0	1	0	0	0	0	eamA, hfq, ftsN, araJ, acrR, tnpA, traM, traM, gntR, gntK, gntP, gndA, tcpC, trbC, merR, marR, ftsK, yxeA, rimL, rsfA, ssuD, czcR, cxxC, gloB, yesE, ubiE, trnV, lmuB, dcm, purR, narK, iolG, iolC, iolA3, iolD, iolE, fba, iolB, rodA, yajC, solG, dltA, solG, ftsN, bglC, vbhA, tnp, dnaJ, lysM, tnp, tnp, gerAB, gerAA, pseC, pseG, pseH, pseI, arpU, fadH2, pspE, pssA, tnp, rimL, xerS, nAGPA, mgtE, ftsW,…		gntK, gnd, phoR, phoB, phoP, phoB, phoB, phoB	2020-12-15	0.3294092295211398			soil sample from Harissa region in Lebanon	552228	Lebanon: Harissa, Kesrouwane	soil sample	circular	339802869	356441581	Lebanon,Harissa,Kesrouwane			Bacilli (91061)	Bacillaceae (186817)	Bacillus (1386)	Bacillus thuringiensis	Bacillales (1385)	Bacillota (1239)	Bacillus_thuringiensis (1428)		Bacteria (2)	-23243744	-4.64151e+16	GCA_016070565.1	35.4	MOBL	mobilizable	0	8
CP053689.1	250451	33.4	0	0	0	222	3	80	0	0	0	0	0	0	ltrA, merR, irrE, copG, mobL, merR, virB4, prgI, luxR, xerC, sleB, ltrA, ybaR, ytiB, copG, xerS, himA, copG, radC, bglH, marR, hlyD		phoP	2020-05-31	0.3338976486418501			soil	250451	USA:Massachusetts	pure culture	circular	423788774	-7203236600000000	USA,Massachusetts			Actinomycetes (1760)	Micrococcaceae (1268)	Arthrobacter (1663)	Arthrobacter citreus	Micrococcales (85006)	Actinomycetota (201174)	Arthrobacter_citreus (1670)		Bacteria (2)	-1993937	-4618210299999990	GCA_013200995.1	33.4	MOBL	mobilizable	0	1
CP062236.1	351150	62.0	0	0	0	403	13	116	0	0	0	0	0	0	arsR, nreB, arsR, lgt, frmR, glpE, dedA, atpE, dedA, fbpB, gntR, tnp, mao, nepB, nepA, abo, purU, pmfR, tnp, tnp, dhpH, kdhC, tnp, tnp, cdaR, kdhA, kdhB, tnp, 6-hlno, ndhS, ndhM, moaD, moaA, glp, moaC, modA, modB, modC, 6-hdno, tnp, satD, parB, gntR, gntR, tniQ, istA, istB, merA, merR, parA, marR, irrE, flhG, trbL, virD4, arsR, lspA, copC, dsbC, czcD, ctaG, ctaG, resB, trkG, ccdA, lspA, tniQ, flu…		RegX3, ugpC, RegX3, RegX3, RegX3	2020-10-08	0.6198405239925957			soil	351150	Egypt	bacterial pure culture	linear	262540493	292675469	Egypt			Actinomycetes (1760)	Micrococcaceae (1268)	Arthrobacter (1663)	Arthrobacter sp. TES	Micrococcales (85006)	Actinomycetota (201174)	Arthrobacter_sp._TES (2774874)		Bacteria (2)	6506078	-2671748	GCA_014863565.1	63.5	non-mob	non-mob	0	5
CP066848.1	523425	33.4	0	0	0	551	25	84	0	2	0	0	0	0	orfB, eamA, thiF, tnp, ftsK, traM, gloB, ycgM, acrR, padR, tnpB, orfB, tnp, tnp, pseC, pseG, pseH, pseI, padR, pbsX, tnp, betT, bclA, map, abrB, hfq, tnp, tetR, dltA, gerPA, arpU, xerD, ywqG, ywqG, qdoI, cDA1, ftsN, marR, phoP, yxeA, tnpB, lysE, vanR, lolD, dAP2, bsh, ftsW, mgtE, nAGPA, xerS, xpaF1, yjcZ, bsrC, cdnL, blaR1, blaI, ahpD, arpU, recU, recU, sepF, tnpB, hhoA, mmuM, mmuP, czcR, tnpB, y…	phoP	phoB, phoB, phoB, phoR, phoR	2021-06-07	0.334464345417204			soil	523425	Poland: Bialowieza National Park	single cell	linear	527623571	238674192	Poland,Bialowieza National Park			Bacilli (91061)	Bacillaceae (186817)	Bacillus (1386)	Bacillus mycoides	Bacillales (1385)	Bacillota (1239)	Bacillus_mycoides (1405)		Bacteria (2)	-21465535	-4600511	GCA_018741985.1	35.5	MOBL	mobilizable	1	5
CP066849.1	228644	33.4	0	0	0	259	7	32	0	0	0	0	0	0	repX, ftsK, dnaN, cdiI, cas5c, cas8c, cas7c, cas4, cas1c, cas2, pucR, pucR, ald, yrzO, phoP, bdbC2, xerS, msrC, aimR, araC, dinB, umuC, yoqH, padR, xRE, herA, prgI, yicC, gspF, gspF, cpaB, ftsZ	phoP	phoP	2021-06-07	0.3340345690243347			soil	228644	Poland: Bialowieza National Park	single cell	linear	527623571	238674192	Poland,Bialowieza National Park			Bacilli (91061)	Bacillaceae (186817)	Bacillus (1386)	Bacillus mycoides	Bacillales (1385)	Bacillota (1239)	Bacillus_mycoides (1405)		Bacteria (2)	-21010675	-48142014	GCA_018741985.1	35.5	MOBL	mobilizable	1	1
CP076412.1	1804572	63.8	4	0	3	1609	1	106	0	0	0	0	0	0	icmH, tssK, tssJ, tssB, tssC, tssC, tssE, tssF, tssG, tssH, vgrG, vasX, tssA, ompA, sciT, tssM, pAAR, uvrA, uspA, uspA, uspA, traR, citB, nodT, mgtA, phbB, polX, groL, luxR, ftsH, tolC, cadA, ethD, tetR, adeB, iclR, araC, araC, araD, lacI, glpK, lysR, ethD, ycgL, tetR, lysR, lysR, lysR, lysR, lysR, yybH, ppsA, fdhF, acsA, pdhA, arsR, rbbA, dbpA, chrA, eutC, iclR, thiF, hppD, ggt, metC, eamA, doxX…	ugpC, phnX	prsA, pps, phoP, phoB, gnl, phoB, phoB, ugpC, phoP, phoB, pyk, phnX, gnl	2021-12-13	0.6377334902680525			soil	1804572	China: Yunnan		circular	25.0	102.0	China,Yunnan			Betaproteobacteria (28216)	Burkholderiaceae (119060)	Ralstonia (48736)	Ralstonia wenshanensis	Burkholderiales (80840)	Pseudomonadota (1224)	Ralstonia_wenshanensis (2842456)		Bacteria (2)	5.62001e+16	-4154372	GCA_021173085.1	63.7	non-mob	non-mob	2	13
CP077416.1	199575	39.4	0	0	0	210	3	48	0	0	0	0	0	0	tolQ, relE, copG, mazF, hicB, hipA, acpP, lolA, fabG2, tnp, tnp, tnp, tnp, tnp, ompA, tnp, hicA, dapA, copG, repM, purU, folD, gntR, tgnB, pcaC, glnT, glxC, gltB2		phy, phy, phy	2021-06-28	0.3935512965050732			soil	199575	China	cell culture	circular	344118455	860326902	China			Gammaproteobacteria (1236)	Moraxellaceae (468)	Acinetobacter (469)	Acinetobacter junii	Moraxellales (2887326)	Pseudomonadota (1224)	Acinetobacter_junii (40215)		Bacteria (2)	10335435	-8291898	GCA_019048765.1	42.1	non-mob	non-mob	0	3
CP077747.1	131248	51.7	0	0	0	114	0	11	0	0	0	0	0	1	repA, ycgF, merR, yajD, adeB, nepI, yfaZ, wbuC, feoB, ssuD, ssuD, arnF, arnE, arnT, arnD, arnA, arnC, arnB, lacI, luxR, tetR, fabF, yiaT, ynfL, budA, alsS, citM, yefM, uvrA, iprA, aroQ, scrR, ptsG2, parB		phoB	2021-07-04	0.5165869194197245			tomato rhizosphere soil	131248	China: Ji Lin, Changchun, Agricultural Science Experimental Station of Jilin Agricultural University	strain	circular	438138733	125404407	China,Ji Lin,Changchun,Agricultural Science Experimental Station of Jilin Agricultural University			Gammaproteobacteria (1236)	Erwiniaceae (1903409)	Pantoea (53335)	Pantoea jilinensis	Enterobacterales (91347)	Pseudomonadota (1224)	Pantoea_jilinensis (2676834)		Bacteria (2)	-11675253	58650126	GCA_019104105.1	54.8	MOBF	mobilizable	0	1
CP077748.1	483571	52.6	0	0	0	474	3	35	0	0	0	0	0	0	repA, parA, parB, lysR, lysR, ydcN, pecS, yhjC, lacI, ymgB, ycgZ, sitC, sitD, lysR, lysR, dapC, isrN, yncE, rpiR, rluF, lysR, yhjC, gabP, gabT, mocR, clcA, yicS, tenA, ascF, lacI, yciT, yybR, yaiC, map, grpB, rskA, lysR, tetR, araC, cybB, fetB, lysR, aegA, pagP, fhuE, ulaA, cmtB, ssuD, ehuA, rdgB, ugpC, gdhA, ribH, metQ, modA, tauC, ycgI, uca, ampR, araC, nccH, fdhF, phoP, xapX, xapX, ytcJ, doxX,…	ugpC, phoP	phoB, ugpC, ugpC, gcd	2021-07-04	0.5255774229637427			tomato rhizosphere soil	483571	China: Ji Lin, Changchun, Agricultural Science Experimental Station of Jilin Agricultural University	strain	circular	438138733	125404407	China,Ji Lin,Changchun,Agricultural Science Experimental Station of Jilin Agricultural University			Gammaproteobacteria (1236)	Erwiniaceae (1903409)	Pantoea (53335)	Pantoea jilinensis	Enterobacterales (91347)	Pseudomonadota (1224)	Pantoea_jilinensis (2676834)		Bacteria (2)	24296877	13103027	GCA_019104105.1	54.8	MOBF	mobilizable	2	4
CP085711.1	507307	37.3	0	0	0	414	7	93	0	0	0	0	0	0	ppsA, merR, fabZ, tnp, radC, priA, rbsC, hmpA, deoR, gntR, deoR, ureJ, tnp, tatA, gntR, ddpC, gsiA, tatA, tatA, tatA, yyaP, copZ, lplB, marA, yfhD, secA, lacI, istB, luxR, pqqD, fbp, gcvPA, gcvPB, ydeG, mlrC, yxeP, manA, yvdQ, eutH, corA, yrdB, herA, xerS, argH, potA, iclR, copG, copG, ecfT, fbpB		phoB, phoX, phoX, phoD, ugpC	2022-06-21	0.373182313668055			soil	507307	China	single cell	circular	344118455	860326902	China			Bacilli (91061)	Bacillaceae (186817)	Bacillus (1386)	Bacillus sp. F19	Bacillales (1385)	Bacillota (1239)	Bacillus_sp._F19 (2884833)		Bacteria (2)	-20519907	-47178264	GCA_023823795.1	39.9	MOBL	mobilizable	0	5
CP090417.1	117458	39.0	0	0	0	125	2	10	0	0	0	0	1	0	tnp, brxC, pglZ, brxL, gabP, gntR, tnp, tnp, tnp, tnp, tnp, tnp, relE, cadR, tnp, ltrA, tnp, tnp, cynS, vapC, relE, tnp, hipA, hicB, tnp, tnp, tnp, tnp, tnp, tnp, tnp, tnp, tnp, tnp, tnp, relE, hipA, hipA		phoA	2022-06-21	0.3900202625619369			soil	117458	Italy: Emilia-Romagna	mixed culture	linear	44525696	11039437	Italy,Emilia-Romagna			Gammaproteobacteria (1236)	Moraxellaceae (468)	Acinetobacter (469)	Acinetobacter johnsonii	Moraxellales (2887326)	Pseudomonadota (1224)	Acinetobacter_johnsonii (40214)		Bacteria (2)	10232108	-8269872	GCA_023822225.1	41.3	non-mob	non-mob	0	1
CP091852.1	435044	63.2	1	0	0	387	0	42	0	0	0	0	0	0	ssuC, gsiA, gsiC, gsiD, gntR, degT, thiF, dppB, hcnB, lysR, lecA, gntR, ttuC, ttuA, sugC, ycjP, lacF, paiB, rhtB, gsiA, fdhE, trnU, parA, fabG, rspR, livH, lptB, ugpC, ugpE, lacF, eamA, luxR, fabG, kstR2, lptB, tetR, echA8, vapC, ddpC, gntR, tauB, arsR, oppF, gsiD, gsiC, ydgJ, xylH, chvE, yjfF, ytfT, ytfQ, repA, repB, maoC, fabG, lptB, gntR, atzE, ddpC, potA, potH, lacI, tolB, siaP, lysR	ugpC, ugpE	ugpC	2022-02-08	0.6319498717371117			forest soil	435044	China: Guangdong	cell culture	circular	231357694	1131982688	China,Guangdong			Alphaproteobacteria (28211)			Hyphomicrobiales bacterium 7MK25	Hyphomicrobiales (356)	Pseudomonadota (1224)	Hyphomicrobiales_bacterium_7MK25 (2895980)		Bacteria (2)	6754273	-4248318	GCA_022059845.1	63.6	MOBQ	mobilizable	2	1
CP094464.1	177301	63.2	0	0	0	186	21	58	0	1	0	0	0	0	aprE, pqqD, ubiH, frwB, pfkB, glpR, menC, kdpA, kdpC, kdpD, baeS, ompR, dps2, gGDEF, menH, tnp, tnp, xerD, yciA, nrdI, nrdB, tnp, tnp, nhaP, fecE, fepD, fepD, viuB, fepB, tetR, tlyC, tlyC, terC, alsT, rapA, yeeA, tnp, tnp, secB, mcrB, mcrC, spo0J, tnp, fepB, cobO, cobB, cbiB, hisC, cobQ, chuT, fepD, hmuV, viuB, tnp, dLH, spoIIAA, spoIIAA, rsbW, rsbW, spo0J, phd, czcD, gGDEF, sgrR, lmrP, gAF, gAF,…		ptsI, nrdE, nrdE, nrdF, glpQ	2022-07-05	0.6318858889684773			soil	177301	South Korea: Jeju Island	prokaryote	circular	3338034745	1.26548e+16	South Korea,Jeju Island			Deinococci (188787)	Deinococcaceae (183710)	Deinococcus (1298)	Deinococcus radiodurans	Deinococcales (118964)	Deinococcota (1297)	Deinococcus_radiodurans (1299)		Bacteria (2)	7993557000000000	-2928238	GCA_024138735.1	67.0	non-mob	non-mob	0	5
CP097774.1	248380	45.4	0	0	3	177	0	11	0	0	0	0	0	0	yhcR, greA, niaR, nifS, nadA, yidC, pgpB, pgpB, ompR, walK, nlpC, rfaB, cpsB, yheC, modF, yfdV, trhO, rbsK, adk, proS, speE, tACO1, acrR, phzB, ybjT, oxdD, ybaK, nagC, bglB, yfcE, aguA, aguB, fadH, fepD, fepD, hxlR, phnB, rsuA, gerAB, gerAC, gerAA, clpP, rpoE, map, tetR, aes, yyaL, tar, pleD, ompR, ectB, mdaB, gGDEF, grsT, ycjR, ygdD, ftnA, alkC, acs, ampS, acrR, acrR, yrkE, frmR, ycaP, gerAB, ge…	ugpB, ugpA, ugpE	RegX3, phoR	2022-05-30	0.4542877848458008			Rizosphere soil sample	248380	Russia: Krasnodar region	Cell culture	circular	450993065	3909635338289400	Russia,Krasnodar region			Bacilli (91061)	Paenibacillaceae (186822)	Paenibacillus (44249)	Paenibacillus polymyxa	Bacillales (1385)	Bacillota (1239)	Paenibacillus_polymyxa (1406)		Bacteria (2)	-0.24517545	-4.55357e+16	GCA_023586805.2	45.5	MOBH	mobilizable	3	2
CP099116.1	82250	49.7	0	0	0	91	0	12	0	1	0	0	1	0	repB, hprS, hprR, hiuH, msrP, msrQ, xerD, ccdB, ccdA, vagC, vapC, psaF, faeI, faeH, faeF, faeE, faeD, repA, tap, copA, repA2, finO, traX, traI, traD, traT, traG, traH, trbB, traF, traN, trbC, traU, traW, traR, trbI, traC, traV, traB, traK, traE, traL, traY, traM, yubP, yeiA, rsmA, ydaB, AS-pc01, yffA, ychA, yubD, yfbA, yubB, parE, putA1		phoB	2023-04-13	0.4965106382978723			Pooled soil sample collected from floor of cattle farm	82250	United Kingdom	culture	circular	5470235450000000	-32765753	United Kingdom	IncFIB(AP001918)_1, AP001918, |IncFII(pHN7A8)_1, JN232517,	IncF RST(F-:A-:B-):FIA(-);FIB(34?);FIC(-);FII(~40);FIIK(-);FIIS(-);FIIY(-)	Gammaproteobacteria (1236)	Enterobacteriaceae (543)	Escherichia (561)	Escherichia coli	Enterobacterales (91347)	Pseudomonadota (1224)	Escherichia_coli (562)		Bacteria (2)	-5762784	29558978	GCA_029719245.1	50.6	MOBF	mobilizable	0	1
CP099174.1	1310597	51.3	23	0	3	1207	0	11	0	12	0	0	0	0	odhB, sucA, sdhB, sdhA, sdhD, sdhC, ybgU, gltA, fimA, ybgQ, ybgP, ybgO, abrB, nei, pxpA, pxpC, pxpB, ybgI, dtpD, ES036, phrB, ybgA, yhhI, ybfQ, ybfC, ybfB, rhsC, ybfA, kdpA, kdpB, kdpC, kdpD, kdpE, speFL, speF, potE, pgm, seqA, ybfF, ybfE, fldA, uof, fur, chiQ, chiP, glnS, nagE, nagB, nagA, nagC, nagD, asnB, trnM, trnL, trnQ, trnQ, trnM, trnQ, trnQ, ubiF, miaB, ybeZ, ybeY, corC, lnt, gltI, sroC, …	phoR, phoB, phoA, gcd, phoP, appA	phoH, purE, purK, ushA, adk, adk, phoR, phoB, phnL, phoA, ptsH, nrdD, pyrH, gcd, phoB, deoB, phnM, purB, purB, phoP, ugpC, spoT, tmk, phoH, phoH, phoB, appA, cmk, ugpC	2023-04-13	0.5127060415978367			Pooled soil sample collected from floor of sheep farm	1310597	United Kingdom	culture	circular	5470235450000000	-32765753	United Kingdom			Gammaproteobacteria (1236)	Enterobacteriaceae (543)	Escherichia (561)	Escherichia coli	Enterobacterales (91347)	Pseudomonadota (1224)	Escherichia_coli (562)		Bacteria (2)	-0.40113026	-0.0132537205	GCA_029718445.1	50.7	MOBF	mobilizable	6	29
CP099214.1	133604	50.7	0	0	0	153	2	18	0	0	0	0	1	0	repA, phnO, relE, proP, tnp, isrC, istB, tnp, tnp, tnp, tnp, rafR, rafA, rafD, tnp, daaA, faeD, faeE, faeF, faeH, faeI, faeJ, tnpB, insE, insE, tnpB, vapC, vagC, ccdA, ccdB, xerD, repE, tnpA, spo0J, parA, tnp, tnp, iS285, phoX, tnp, putA1, parE, tnp, daaA, faeD, faeE, faeF, faeH, faeI, faeJ, spo0J, tnp, tnpA, tnpB, sok, yeiA, yubP, traM, traY, traL, traE, traK, traB, traV, traC, trbI, traR, traW,…	phnO, phoX	phoH, phoX	2023-04-13	0.5069683542408909			Pooled soil sample collected from floor of pig farm	133604	United Kingdom	culture	circular	5470235450000000	-32765753	United Kingdom	IncFIA(HI1)_1, AF250878, |IncFII(pCoo)_1, CR942285,	IncF RST(F-:A-:B-):FIA(~19);FIB(-);FIC(-);FII(35?);FIIK(-);FIIS(-);FIIY(-)	Gammaproteobacteria (1236)	Enterobacteriaceae (543)	Escherichia (561)	Escherichia coli	Enterobacterales (91347)	Pseudomonadota (1224)	Escherichia_coli (562)		Bacteria (2)	-5739803	29470882	GCA_029715845.1	50.8	MOBF	mobilizable	2	2
CP099215.1	128784	48.0	0	0	0	144	4	23	0	2	0	0	1	0	repB, intM, cofR, hilD, cofC, cofD, cofE, cofF, lngG, cofH, orfA, tnp, tnp, tnp, araC, ompC, tnp, tnp, phoX, paa, araC, bhsA, yncE, tnp, putA1, repA, tap, copA, repA2, sok, traX, traI, traD, traT, traS, traG, traH, trbB, traF, traN, trbC, traU, traW, trbI, traC, traB, traK, traE, traL, traA, traM, yeiA, tnp, tnpB, tnpA, sok, yraN, psiA, psiB, spo0J, yubL, yubK, tnp, tnpB, tnpA, spo0J, sopA, tnp, …	phoX	phoH, phoH, phoX	2023-04-13	0.4799975152192819			Pooled soil sample collected from floor of pig farm	128784	United Kingdom	culture	circular	5470235450000000	-32765753	United Kingdom	IncFIB(AP001918)_1, AP001918, |IncFII(pHN7A8)_1, JN232517,	IncF RST(F-:A-:B-):FIA(-);FIB(56?);FIC(-);FII(78?);FIIK(-);FIIS(-);FIIY(-)	Gammaproteobacteria (1236)	Enterobacteriaceae (543)	Escherichia (561)	Escherichia coli	Enterobacterales (91347)	Pseudomonadota (1224)	Escherichia_coli (562)		Bacteria (2)	-5352885	3.59284e+16	GCA_029715845.1	50.8	MOBF	mobilizable	1	3
CP099720.1	180989	52.1	0	0	0	225	7	33	0	2	0	0	0	0	pcoC, pcoD, pcoR, pcoS, rcnA, rcnR, tnp, phnO, repA, traX, tnp, tnpA, spoIVCA, merE, merD, merA, merC, merP, merT, merR, cinB, marR, tnp, tnp, chrA, padR, arsH, arsR, arsB, arsC, tnp, ydfA, parD, parE, sulP, uspA, arsC, arsB, arsA, arsD, eno, gpmA, crcB, mutS, mutS, mutS, uspA, vapC, vagC, sopA, dinP, lexA, ecoRIIM, areA, spo0J, psiB, psiA, sok, traL, traE, traK, traB, traB, yafA, traV, traC, tra…	phnO, phnO	phoB, RegX3, phoB	2022-07-03	0.5214847311162557			soil	180989	China: wuhan	bacteria	circular	3.05951e+16	1142999353	China,wuhan	IncFII(pENTA)_1, CP003027, |IncFIB(pENTAS01)_1, CP003027,	IncF RST(F-:A-:B-):FIA(-);FIB(-);FIC(-);FII(-);FIIK(-);FIIS(-);FIIY(-)	Gammaproteobacteria (1236)	Enterobacteriaceae (543)	Enterobacter (547)	Enterobacter sp. Z1	Enterobacterales (91347)	Pseudomonadota (1224)	Enterobacter_sp._Z1 (2561927)		Bacteria (2)	1063769	17010604	GCA_024125655.1	54.4	MOBF	mobilizable	2	3
CP101281.1	1441107	65.5	2	0	3	1367	69	182	0	0	0	0	0	0	lysR, lysR, tniQ, tnp, hutD, lysR, hutG, glnT, tnpB, istB, tnp, xerD, xerC, tnsA, tnsD, dhaK, rocR, msuE, sfnG, sfnB, potE, aRO8, lysE, lysE, lysR, lysR, glcD, livK, rhaT, lysR, gstA, ompC, potA, potH, potI, mdlB, acrR, osmC, aes, luxR, flhD, flhC, yohJ, lrgB, wrbA, lysR, lprI, purR, rbsK, uhpC, dapA, doxX, fabG, lysR, hns, araJ, dmpG, mhpT, lysR, lysR, tonB, exbB, trxA, marR, menH, araC, potE, b…	pstS	pstS, phoP, RegX3, gdh, spoT, purA	2022-07-18	0.6551685613906532			soil	1441107	China: ezhou	bacteria	circular	303925379	1.1489e+16	China,ezhou			Betaproteobacteria (28216)	Burkholderiaceae (119060)	Burkholderia (32008)	Burkholderia sp. FXe9	Burkholderiales (80840)	Pseudomonadota (1224)	Burkholderia_sp._FXe9 (2962884)		Bacteria (2)	597573	-37188563	GCA_024298805.1	66.0	MOBP	mobilizable	1	6
CP104131.1	3521393	62.7	53	1	9	3428	104	250	0	1	0	1	0	0	rrs, trnI, trnA, rrl, rrf, trnfM, dppB, lysR, deoR, dppD, dppC, ugpQ, ycjR, hisJ, dadA, hisM, rhaT, ehuA, rbsK, agaS, mngR, marR, emrA, arpD, citB, hppD, lrp, marR, hmgA, ycgM, maiA, purU, lpdA, aceF, acoB, acoA, dadA, lysR, modC, modB, modA, ung, cobF, cobG, cobH, cobI, cobJ, cobK, cobL, cobM, lysR, mnhG, phaF, phaE, phaC, mnhB, phaAB, cHASE, cDC9, ySH1, uRH1, lysS, gltX, terC, ydeE, acrR, emrA,…	ugpQ, ugpC, ugpE, ugpA, ugpB, ugpB, ugpA, ugpE, ugpA, ugpE, ugpC, ugpE, ugpA, ugpB, ugpB, ugpA, ugpE, phnP, ugpQ, phoX, ugpQ, gcd, phoB, phoU, pstB, pstA, pstC, pstS, phoR, ugpB, ugpA, ugpE, pit, ugpB, ugpA, ugpE, ugpB, ugpA, ugpE, phnK, phoD, ppa, ugpB, ugpA, ugpE, ugpB, ugpE, ugpA	ugpQ, ugpC, pyk, purK, purE, prsA, purA, phoB, ugpC, ugpC, ugpC, prsA, phoB, ugpC, ugpC, ugpE, ugpC, thyA, gnd, ugpC, ugpC, rpiA, purL, purQ, purS, purC, purB, tmk, nrdJ, nrdJ, pyrH, pyrG, adk, adk, adk, ppk, purM, purN, ndk, gmk, gmk, purF, phoX, spoT, phoP, phoP, gcd, ppdK, purD, ugpC, deoB, ugpC, phoB, phoU, pstB, pstA, pstC, phoR, pyrE, phoH, phoH, dut, pyrF, guaA, cmk, ugpC, pit, deoB, ugpC,…	2023-03-14	0.6267238561557883	Phaseolus vulgaris		nodule from plant grown in inoculum free soil	3521393	Canada: Kelburn, Manitoba	cell culture	circular	5016899119665080	-9704687046571110				Alphaproteobacteria (28211)	Rhizobiaceae (82115)	Sinorhizobium (28105)	Sinorhizobium sp. K101	Hyphomicrobiales (356)	Pseudomonadota (1224)	Sinorhizobium_sp._K101 (2976820)		Bacteria (2)	6726797	-4165215	GCA_029201645.1	62.7	MOBQ	mobilizable	48	79
CP104132.1	772620	60.8	1	0	0	796	29	116	0	0	0	0	0	0	dadA, cpaF, asnC, argE, gabD, nikD, pepP, oxdD, tm-1N, acrR, ugpB, ugpA, malK, malK, serA, fadR, rspA, ycjR, ycjR, nhaA, nhaA, citT, lysR, cutB, cutS, coxL, ar14, ar35, araJ, doxX, ytcJ, xapX, pncA, gloA, lysR, menH, araC, tnpB, insE, ureJ, tetR, cspC, perM, clpX, copG, trnI, lysR, tnp, ldhA, parE, relB, tniQ, clpS, araC, tnpB, vapC, arsH, arsB, arsC, arsR, vapC, marR, lysR, ridA, fadH, lysR, gGD…	ugpB, ugpA, ugpA, ugpE, ugpE, ugpA, ugpB, ugpC	ugpC, ugpC, ugpC, phoB, gnl, ugpC	2023-03-14	0.6083676322124718	Phaseolus vulgaris		nodule from plant grown in inoculum free soil	772620	Canada: Kelburn, Manitoba	cell culture	circular	5016899119665080	-9704687046571110				Alphaproteobacteria (28211)	Rhizobiaceae (82115)	Sinorhizobium (28105)	Sinorhizobium sp. K101	Hyphomicrobiales (356)	Pseudomonadota (1224)	Sinorhizobium_sp._K101 (2976820)		Bacteria (2)	6250735	-44342427	GCA_029201645.1	62.7	MOBQ	mobilizable	8	6
CP104136.1	1695765	62.6	2	0	0	1632	54	145	0	1	0	0	0	0	denD, fabG, malK, ugpB, ugpA, ugpE, aRA1, asnB, acpP, menE, nadE, minC, minD, minE, citB, comP, eAL, erfK, hemK, rfbX, rhtB, gumC, rfaL, cDA1, rfaB, rfaB, vanZ, bcsA, acrA, lrp, cyoD, cyoC, cyoB, cyoA, nepR, rpoE, fabG, terC2, prsD, prsE, mngR, celF, rbsK, malK, ugpA, ugpE, yjlB, gstA, udg4, glgX, top1, osmY, ridA, dctP, dctM, dctQ, argE, ubiE, fepD, fepC, rfbC, wbbJ, wcaG, cmcI, rfbG, glcD, gadA…	ugpB, ugpA, ugpE, ugpA, ugpE, ugpB, ugpA, ugpE, phnN, phnM, phnE, phnE, phnD, phnC, phnW, phnY, ugpE, ugpA, ugpB, ugpE, ugpA, ugpB, ugpB, ugpE, ugpA, phnP, ugpB, ugpA, ugpE, ugpC, ugpE, ugpA, ugpB, ugpB, ugpB, ugpB, ugpC, ugpE, ugpA, ugpB, ugpE, ugpA, ugpB, ugpE, ugpA, ugpB, gcd, ugpE, ugpA, ugpB, ugpB, ugpA, ugpA, ugpE, ugpB, phnL, phnK, phnJ, phnI, phnH, phnG, phnF, ugpB, ugpA, ugpE, ugpA, ugpE	ugpC, ugpC, phnN, phnM, phnN, phnE, phnE, phnD, phnC, phoB, phnW, phnA, phny, aepX, RegX3, ugpC, ugpC, ugpC, ugpC, gntK, ugpC, phoB, phoB, ugpC, gnl, ugpC, ugpE, ugpA, ugpB, ugpC, ugpC, ugpC, ugpC, ugpC, ugpC, ugpC, ugpC, phnL, phnK, phnJ, phnI, phnH, phnG, phoB, ugpC	2023-03-14	0.626423472592016	Phaseolus vulgaris		nodule from plant grown in inoculum free soil	1695765	Canada: Carman, Manitoba	cell culture	circular	495082995	-980016853	Canada,Manitoba,Carman			Alphaproteobacteria (28211)	Rhizobiaceae (82115)	Sinorhizobium (28105)	Sinorhizobium sp. C101	Hyphomicrobiales (356)	Pseudomonadota (1224)	Sinorhizobium_sp._C101 (2976819)		Bacteria (2)	67108254	-3979409200000000	GCA_029201665.1	62.7	MOBQ	mobilizable	67	45
CP104137.1	772646	60.8	1	0	0	802	22	126	0	0	0	0	0	0	tnpB, araC, clpS, tniQ, relB, parE, ldhA, tnp, lysR, trnI, copG, clpX, perM, cspC, tetR, ureJ, insE, tnpB, menH, lysR, gloA, pncA, xapX, ytcJ, doxX, araJ, ar35, ar14, glf, coxL, cutS, cutB, copG, lysR, nhaA, nhaA, ycjR, ycjR, rspA, fadR, serA, malK, malK, ugpA, ugpB, acrR, tm-1N, oxdD, pepP, nikD, gabD, argE, puuC, cpaF, dadA, xerD, sTE14, lysR, grpB, lysR, ugpC, gntR, ugpB, ugpA, ugpE, ycjR, xer…	ugpA, ugpB, ugpC, ugpB, ugpA, ugpE, ugpE, ugpA	ugpC, ugpC, ugpC, gnl, phoB, ugpC	2023-03-14	0.608288918858054	Phaseolus vulgaris		nodule from plant grown in inoculum free soil	772646	Canada: Carman, Manitoba	cell culture	circular	495082995	-980016853	Canada,Manitoba,Carman			Alphaproteobacteria (28211)	Rhizobiaceae (82115)	Sinorhizobium (28105)	Sinorhizobium sp. C101	Hyphomicrobiales (356)	Pseudomonadota (1224)	Sinorhizobium_sp._C101 (2976819)		Bacteria (2)	6260311	-44334755	GCA_029201665.1	62.7	MOBQ	mobilizable	8	6
CP124684.1	67584	38.4	0	0	0	93	1	26	0	0	0	0	0	0	feoA, cadR, tnp, repM, parA, copG, nadS, asnC, lysE, tnp, tnp, tnp, ompR, cadA, copC, copZ, rcnR, dmeF, tnp, qseB, eptA, tnp, hicB, hicA, arsC, arsB, arsH		phoB, phoB	2023-05-10	0.3839370265151515			peat soil samples	67584	Malaysia	Whole organism	circular	4089206	100562935	Malaysia			Gammaproteobacteria (1236)	Moraxellaceae (468)	Acinetobacter (469)	Acinetobacter radioresistens	Moraxellales (2887326)	Pseudomonadota (1224)	Acinetobacter_radioresistens (40216)		Bacteria (2)	0.9603042	-8270925	GCA_029961705.1	41.6	non-mob	non-mob	0	2
CP124688.1	45906	24.2	0	0	0	73	10	31	0	0	0	0	0	0	uspA, marR, copG, parA, yedZ, bclA, srtB		phoB	2023-05-10	0.2424737507079684			peat soil sample	45906	Malaysia	Whole organism	circular	4089206	100562935	Malaysia			Clostridia (186801)	Clostridiaceae (31979)	Paraclostridium (1849822)	Paraclostridium bifermentans	Eubacteriales (186802)	Bacillota (1239)	Paraclostridium_bifermentans (1490)		Bacteria (2)	1132945	-2481602	GCA_029961725.1	28.9	MOBM	mobilizable	0	1
CP124691.1	146436	26.8	0	0	0	206	24	53	0	0	0	0	0	0	yoxB, padR, aspS, vanZ, araC, natK, msbA, abgB, arsR, prdC, prdB, asrA, asrB, asrC, nirC, copG, vanZ, marR, asrC, asrB, asrA, arsR, arsB, cspD, mepA, marR, hisS, bsh, xRE, sugE, modA, padR, mreB, yycH		ppa	2023-05-10	0.2684312600726597			peat soil sample	146436	Malaysia	Whole organism	circular	4089206	100562935	Malaysia			Clostridia (186801)	Clostridiaceae (31979)	Paraclostridium (1849822)	Paraclostridium bifermentans	Eubacteriales (186802)	Bacillota (1239)	Paraclostridium_bifermentans (1490)		Bacteria (2)	-11498132	-4500718599999990	GCA_029961725.1	28.9	MOBM	mobilizable	0	1
CP124692.1	23798	26.1	0	0	0	31	1	17	0	0	0	0	0	0	Flavo-1		phoB	2023-05-10	0.2614085217245147			peat soil sample	23798	Malaysia	Whole organism	circular	4089206	100562935	Malaysia			Clostridia (186801)	Clostridiaceae (31979)	Paraclostridium (1849822)	Paraclostridium bifermentans	Eubacteriales (186802)	Bacillota (1239)	Paraclostridium_bifermentans (1490)		Bacteria (2)	-17863231	-42330956	GCA_029961725.1	28.9	MOBM	mobilizable	0	1
CP126591.1	232104	33.5	0	0	0	247	7	35	0	0	0	0	0	0	nirD, nirB, yeiB, iscR, graR, traX, yxeA, flgG, tnp, tnp, rfbG, rfbF, hfq, czcR, norM, soxR, yndB, xerS, pucB, coxL, aimR, tnp, tnp, fbpA, yqaJ, tnp, gntR, lacI, umuC, herA, ltrA, prgI, sipL, gspF, gspF, cpaB, tubR, tubZ, ftsK, araC, xerD, tnpB		RegX3, RegX3	2023-06-06	0.334785268672664			warm, humid forested area with dark clay soil, about 15 cm from the trunk of an Encino tree (Quercus glaucoides (5 cm deep))	232104	Mexico: Tepoztlan, Morelos	bacterial isolate	circular	18.99	-99.11				Bacilli (91061)	Bacillaceae (186817)	Bacillus (1386)	Bacillus bombysepticus	Bacillales (1385)	Bacillota (1239)	Bacillus_bombysepticus (658666)		Bacteria (2)	-28303945	-47330303	GCA_030179875.1	35.3	MOBL	mobilizable	0	2
CP126592.1	600534	32.5	1	0	0	507	5	65	0	2	0	0	0	0	glcU, queH, lanM, sbnB, sbnA, kabD, kabC, kabB, zmaQ, zmaN, zmaL, zmaJ, echA8, ubiG, tnp, tnp, asnB, acrR, tnpA, ubiG, gntR, azlC, azlD, sigS, rmuC, yesE, gloB, cxxC, trnI, arsR, rsfA, dinB, tnpB, tnp, traG, traM, cpaB, gspF, gspF, recU, arpU, tnp, prgI, herA, arsR, ampS, acrR, rimI, yxeA, fabF, mnaT, copG, vanR, vanS, lolD, lolD, umuC, umuC, lacI, arsR, parB, ampC, ampC, tnpB, potE, cspD, bsrC, …		gdh, spoT, RegX3	2023-06-06	0.3252904914625983			warm, humid forested area with dark clay soil, about 15 cm from the trunk of an Encino tree (Quercus glaucoides (5 cm deep))	600534	Mexico: Tepoztlan, Morelos	bacterial isolate	circular	18.99	-99.11				Bacilli (91061)	Bacillaceae (186817)	Bacillus (1386)	Bacillus bombysepticus	Bacillales (1385)	Bacillota (1239)	Bacillus_bombysepticus (658666)		Bacteria (2)	-26906462	-4524197	GCA_030179875.1	35.3	MOBL	mobilizable	0	3
CP131057.1	801789	63.0	3	0	3	705	0	158	0	0	0	0	0	0	hicB, lysR, lpxI, gntR, eamA, asnC, parD1, nrfE, gsiA, ppsC, marR, srfB, eryC1, slmA, tctD, qseC, lysR, iclR, ydeK, fliG, fabG, ugpE, fecR, fhuC, glcD, glcE, rrs, trnI, trnA, rrl, rrf, trnfM, pfkB, eamA, ompR, teaA, pgrR, nrdH, nrdI, nrdF2, potA, novR, dgdR, lmbE, lysR, lysR, araC, takP, mctR, mctS, lacI, luxR, yxlF, proW, glmU, vapC, imuB, ugpC, ugpE, eamA, pqqD, gntR, kduD, bla, lysR, yfcG, yce…	ugpE, ugpC, ugpE, ugpC, ugpA, ugpE	nrdE, nrdF, gcd, ugpC, ugpE, ugpA, phoB, ugpC, gcd, phoB, ugpC, ugpC, RegX3, ugpC	2023-08-06	0.6298776860246275	tomato		rhizosphere soil	801789	South Korea: Busan	bacteria	circular	351799528	1290752365	South Korea,Busan			Alphaproteobacteria (28211)			Hyphomicrobiales bacterium UR115	Hyphomicrobiales (356)	Pseudomonadota (1224)	Hyphomicrobiales_bacterium_UR115 (3064829)		Bacteria (2)	6914167999999990	-423485	GCA_030657355.1	64.0	non-mob	non-mob	6	14
CP135083.1	316199	58.9	0	0	0	319	10	38	0	0	0	0	0	0	oxdD, luxR, fixJ, bisC, dps, menH, ompR, araJ, nhaP, abrB, pilT, vapC, abrB, yqzM, nhaP, araJ, ompR, menH, dps, bisC, fixJ, luxR, oxdD, glgA, treZ, ctaD, coxB, catE, oppF, ggt, dppC, dppB, ddpA, fadR, rspA, nikD, dppC, dppB, ddpA, fdhF, nuoF, nuoE, lysR, dcg1, rutF, gntR, dppD, dppD, ssnA, dppC, dppB, ddpA, ssnA, ldhA, glnQ, hisM, hisM, hisJ, ethD, purR, prdF, lhpI, dadA, ehuA, hisM, hisM, hisJ, …	ugpB, ugpA, ugpE, ugpC, ugpE	ugpC, pit, ugpC, ugpE, ugpA	2023-09-30	0.5893282394947486			Heavy rainforest soil	316199	Indonesia: Central Kalimantan	Single cell	circular	-2324342	111766196				Alphaproteobacteria (28211)	Rhizobiaceae (82115)	Agrobacterium (357)	Agrobacterium pusense	Hyphomicrobiales (356)	Pseudomonadota (1224)	Agrobacterium_pusense (648995)		Bacteria (2)	67697754	-4.39623e+16	GCA_032229345.1	59.4	MOBQ	mobilizable	5	5
LR606148.1	462569	58.6	1	0	0	450	2	81	0	0	0	0	0	0	repA, repB, ctRNA_p42d, repC, vapC, istA, istB, metC, nocR, ccoN, ccoO, fixQ, ccoP, ccoS, vapC, nikD, fadR, ccmA, parD, nmrA, vapC, vapC, gntR, dctP, yjmC, gntR, rbsA, yajL, cml, ampC, bla, lacI, ugpC, vapC, tctB, iclR, lysR, tetR, ugpC, gntR, ugpB, ugpA, ugpE, ycjR, tetR, vapB, vapC, marR, degQ, lysR, parD, ctaD, coxB, copD, glxA, eamA, lysR, ligD, dnaE, hipA, bhuA, lacI, istA, istB, hlyD, trnS,…	ugpC, ugpC, ugpB, ugpA, ugpE	ugpC, ugpC, ugpC, RegX3	2019-07-04	0.5863946784155445			paddy soil contaminated with arsenic due to geogenic reasons	462569	China		circular	344118455	860326902	China			Alphaproteobacteria (28211)	Rhizobiaceae (82115)	Rhizobium (379)	Rhizobium sp. Q54	Hyphomicrobiales (356)	Pseudomonadota (1224)	Rhizobium_sp._Q54 (1335060)		Bacteria (2)	6644369999999990	-48089747	Record suppressed	NA	MOBQ	mobilizable	5	4
LR606149.1	216185	57.3	0	0	0	240	2	83	0	0	0	0	1	0	lysR, tetR, yrdN, traG, traD, traC, traA, traF, traB, Atu_Ti1, hipB, traM, trbI, trbH, trbG, trbF, trbL, trbK, trbJ, virB4, trbD, virB2, trbB, lasI, repB, ctRNA_p42d, mgtC, mgtC, lysE, tnp, vapB, cspA, tniQ, yfmC, yfmE, ycdT, tnpB, tnp, virG, marR, flgE, tnp, tnpB, tnp, tnpB, virG, ligA, ligB, tnp		phoB, phoB	2019-07-04	0.5734255383120939			paddy soil contaminated with arsenic due to geogenic reasons	216185	China		circular	344118455	860326902	China			Alphaproteobacteria (28211)	Rhizobiaceae (82115)	Rhizobium (379)	Rhizobium sp. Q54	Hyphomicrobiales (356)	Pseudomonadota (1224)	Rhizobium_sp._Q54 (1335060)		Bacteria (2)	65662823	-48141065	Record suppressed	NA	MOBQ	mobilizable	0	2
LR606151.1	138601	58.5	0	0	0	150	1	21	0	0	0	0	0	0	vapC, glp, aioR, aioS, aioX, phoB, pstC, pstA, pstB, phoU, phoB, phnC, phnE, phnE, arsR, arsC, arsB, arsO, arsK, arsH, arsR, eno, eamA, lspA, tnp, merR, merT, merA, hisI, merT, merC, ftsI, psiB, repC, vbhA, ardC, repA, repB, ctRNA_p42d, copG, traA, traG, virB11, virB9, virB8, virB4, virB3, merR, arsR, copZ, lspA, dsbB, mauE	phoB, pstC, pstA, pstB, phoU, phoB, phnC, phnE, phnE	phoB, pstS, pstC, pstA, pstB, phnC, phnE	2019-07-04	0.5849885642960729			paddy soil contaminated with arsenic due to geogenic reasons	138601	China		circular	344118455	860326902	China			Alphaproteobacteria (28211)	Rhizobiaceae (82115)	Rhizobium (379)	Rhizobium sp. Q54	Hyphomicrobiales (356)	Pseudomonadota (1224)	Rhizobium_sp._Q54 (1335060)		Bacteria (2)	6672304	-48492465	Record suppressed	NA	MOBQ	mobilizable	9	7
LR723669.1	118533	60.1	0	0	0	138	3	33	0	0	0	0	0	0	ompR, baeS, xerD, nirK, repB, ctRNA_p42d, traG, psiB, lexA, dinP, ar15, ar15, lgt, dsbB, trbI, yafK, relE, merR, istA, istB, ftsI, dsbB, lspA, merR, nirK, cls, istB, slmA, emrA, lolE, lolD, cadA, cadA, copZ, lysR		RegX3	2019-10-10	0.600634422481503			contaminated soil sample obtained from a drilling mud pit	118533	Iran		circular	3655555556	6079916667				Alphaproteobacteria (28211)	Rhizobiaceae (82115)	Rhizobium (379)	Rhizobium sp. Khangiran2	Hyphomicrobiales (356)	Pseudomonadota (1224)	Rhizobium_sp._Khangiran2 (1435607)		Bacteria (2)	6746773200000000	-48628554	Record suppressed	NA	MOBQ	mobilizable	0	1
LR723676.1	190427	59.4	0	0	0	185	0	27	0	0	0	0	0	0	repA, repB, repC, vbhA, vapC, yccC, tnp, eamA, dld, dctQ, dctP, adhE, eutG, lysR, ydcO, rbsC, tnp, hxlR, tnp, vapC, gntR, fliY, rutD, eutG, lptB, lysR, rpiB, dctP, gntR, prdF, gntR, dapA, pncA, livK, livG, livH, pncA, iclR, ridA, hisJ, pfkB, sugC, ugpE, lacF, eamA, ethD, lacI, kaiA	ugpE	ugpC	2019-10-10	0.5939546387854664			soil	190427	India		circular	20009515	6442206039999990	India			Alphaproteobacteria (28211)	Rhizobiaceae (82115)	Rhizobium (379)	Rhizobium sp. TCK	Hyphomicrobiales (356)	Pseudomonadota (1224)	Rhizobium_sp._TCK (136098)		Bacteria (2)	6916138	-45748672	Record suppressed	NA	MOBQ	mobilizable	1	1
NC_014811.1	211864	65.6	0	0	0	233	2	49	0	0	0	0	0	0	xerD, xerC, parB, marR, whiB, ubiE, arsR, cadA, arsB, arsR, xerD, xerC, Ms_IGR-7, tnp, ripA, blaI, ripB, tnp, xerD, xerD, xerC, istA, ripB, ripC, regX3, ripA, blaI, htpX, blaI, mepM, crgA, lnt, yycF, rpfE, lpqS, mdtH, moeB, copY, tnp, Ms_IGR-7, cadA, tnp, Ms_IGR-7, traM, mobF, tra5, tnp, tnp, tnp, nrdH, vapC, blaI, mraW, csoR, baeB, cmtR, cadA, lspA, resA		phoP, phoB	2010-12-23	0.6560954197032058			creosote contaminated soil	211864	Greece		circular	39674495	20840141				Actinomycetes (1760)	Mycobacteriaceae (1762)	Mycolicibacterium (1866885)	Mycolicibacterium gilvum Spyr1	Mycobacteriales (85007)	Actinomycetota (201174)	Mycolicibacterium_gilvum (1804)	Mycolicibacterium_gilvum_Spyr1 (278137)	Bacteria (2)	6992122999999990	-24875624	GCF_000184435.1	67.9	non-mob	non-mob	0	2
NC_018022.1	615278	65.7	0	0	0	640	5	107	0	0	0	0	0	0	Ms_AS-8, istA, istB, trwC, xerC, kfrA, bssS, vapC, vapB2, xerD, tnp, thsA, xerD, xerD, groL, devS, mazF1, xerD, xerD, pucR, istA, istB, mobF, nrdH, merR, arsR, merA, merB, xerD, nrdH, xerD, xerD, istB, istA, mobF, eccA3, tcpC, eccE2, mycP, eccD, espG1, esxN, esxB, eccC5, eccB, ybaB, bssS, copG, copG, padR, bssS, fabG, thiC, xerD, istA, istB, insE, xerD, merB, merA, arsR, merR, csoR, csoR, xerD, x…		adk, phoP	2012-06-20	0.6567714106468946			creosote-contaminated soil	615278	Missing		circular						Actinomycetes (1760)	Mycobacteriaceae (1762)	Mycolicibacterium (1866885)	Mycolicibacterium chubuense NBB4	Mycobacteriales (85007)	Actinomycetota (201174)	Mycolicibacterium_chubuense (1800)	Mycolicibacterium_chubuense_NBB4 (710421)	Bacteria (2)	70605416	-24860644	GCF_000266905.1	68.7	non-mob	non-mob	0	2
NC_019699.1	370830	45.1	0	0	0	376	0	71	0	0	0	0	0	0	degQ, lepB, fabG, cr066, crcB, tauE, arsB, ykoI, gGDEF, yneE, baeS, ompR, ccc1, cotJC, glpF, ompR, araJ, frmR, rppB, rppA, sufI, cusA, cadA, cobH, zntA, sufI, gorA, fldA, csa3, copZ, cadA, soxR, ubiE, mraW, mreD, luxR, ykvA, insQ, tnpA, ubiE, perM, yvlD, mscK, tPR, qcrA, zupT, sufI, ynfA, batD, czcD, arsR, copZ, gloB, gerM, arsR, c2c8, acrA, cusA, rppA, rppB, pcxA, czcD, csa3, rpoD, yneE, nlpD, c…		phoB, phoB, phoB, phoP, phoB, RegX3, phoR	2012-12-05	0.4506377585416498			soil sample, near Greifswald, East Germany	370830	Germany		circular	5410114	133885				Cyanophyceae (3028117)	Chroococcidiopsidaceae (1890528)	Chroococcidiopsis (54298)	Chroococcidiopsis thermalis PCC 7203	Chroococcidiopsidales (1890505)	Cyanobacteriota (1117)	Chroococcidiopsis_thermalis (54299)	Chroococcidiopsis_thermalis_PCC_7203 (251229)	Bacteria (2)	1099431	-0.5494182	GCF_000317125.1	44.4	MOBV	mobilizable	0	7
NC_019763.1	300164	45.1	0	0	0	242	0	72	0	0	0	0	0	0	insQ, rppA, rppB, arsC, arsH, cDC14, glpF, pstS, arsR, soxR, citB, ompR, spo0J, parA, immA, thiF, hsdM, hsdS, ygjP, hsdM, insQ, spoVK, dNA2, polA, tnp, nlpD, insQ, rAYT, virD4, hepA, parA, xerD, spo0J, holA, dnaX, dnaN, drmA, fdxN, fdxN, drmD, recD, xerD, trbI, trbJ, xisI, xisH, thiF, ycjD, recG, zorC, yprA, rimI, copZ, soxR, cadA, mntH, batD, cadA, czcD, arsR, czcA, soxR, cysK, matE, wecH, yvpB,…	pstS	phoB, pstS, phoB	2012-12-06	0.451266640902973			soil in orchid house	300164	USA		circular	397837304	-1004458825	USA			Cyanophyceae (3028117)	Oscillatoriaceae (1892254)	Oscillatoria (1158)	Oscillatoria nigro-viridis PCC 7112	Oscillatoriales (1150)	Cyanobacteriota (1117)	Oscillatoria_nigro-viridis (482564)	Oscillatoria_nigro-viridis_PCC_7112 (179408)	Bacteria (2)	10491396	-0.006231559	GCF_000317475.1	45.9	MOBV	mobilizable	1	3
NC_019789.1	556630	62.0	0	0	3	593	1	137	0	0	0	0	0	0	fecE, trxA, ethD, trxA, trxB, ahpD, gabD, abrB, xerC, nikB, pxpB, topA, nucS, nucS, nikC, higA, copG, copG, eda, eda, dgoD, dctP, dctM, xerD, rtcB, abrB, xerD, cadA, xerD, gmd, wbaP, dinB, lpdA, chrA, chrA, tctA, tctB, tcuA, yjgF, insA, rrf, rrl, rrs, msrB, doxX, doxX, xerD, lpdA, ynfA, cadA, copZ, merE, fixQ		gdh, phoP	2012-12-10	0.6204750013473942			Arid soil collected from a coastal desert north of Antofagasta in Chile	556630	Chile		circular	-24.6	-69.53				Deinococci (188787)	Deinococcaceae (183710)	Deinococcus (1298)	Deinococcus peraridilitoris DSM 19664	Deinococcales (118964)	Deinococcota (1297)	Deinococcus_peraridilitoris (432329)	Deinococcus_peraridilitoris_DSM_19664 (937777)	Bacteria (2)	73955135	-31950498	GCF_000317835.1	64.0	non-mob	non-mob	0	2
NZ_CP004860.1	422692	32.6	1	0	0	361	6	40	0	1	0	0	0	0	ltrA, ltrA, ltrA, tnp, tetR, ydcZ, tnp, zmaJ, zmaL, zmaN, zmaQ, sbnA, sbnB, lanM, tnp, tnp, queH, yhcF, thnB, thnT, thnI, glcU, tnp, tnpB, pssA, tnp, tnp, yycF, tnp, istB, xerS, ltrA, yddR, lgt, tnp, tnp, tnp, tnp, istB, tnpB, ycgB, asnB, acrR, tnpB, lolD, vanR, lytD, ubiG, tnpB, tnp, tnp, tnpB, tnp, xpaF1, immA, tnp, gntR, azlC, azlD, trnI, cynS, tolA, tnpB, yxeA, rsfA, traG, ltrA, tnp, istB, tr…		gdh, ushA, spoT, spoT, phoB	2015-01-21	0.3258022389825215			soil	422692	China		circular	344118455	860326902	China			Bacilli (91061)	Bacillaceae (186817)	Bacillus (1386)	Bacillus thuringiensis serovar kurstaki str. YBT-1520	Bacillales (1385)	Bacillota (1239)	Bacillus_thuringiensis (1428)	Bacillus_thuringiensis_serovar_kurstaki_str._YBT-1520 (570416)	Bacteria (2)	-2681955	-4468681	GCF_000688795.1	35.3	MOBL	mobilizable	0	5
NZ_CP004877.1	431546	32.7	1	0	0	375	4	46	0	1	0	0	0	0	tnp, zmaJ, zmaL, zmaN, zmaQ, sbnA, sbnB, lanM, tnp, tnp, queH, yhcF, thnB, thnT, thnI, glcU, dsbB, tnp, tnpB, pssA, tnp, tnp, yycF, tnp, istB, xerS, ltrA, yddR, lgt, tnp, tnp, tnp, tnp, istB, tnpB, ycgB, asnB, acrR, tnpB, lolD, vanR, lytD, ubiG, tnpB, tnp, tnp, tnp, xpaF1, immA, tnp, gntR, azlC, azlD, trnI, cynS, tolA, tnpB, yxeA, rsfA, traG, ltrA, ltrA, traG, traM, cpaB, gspF, gspF, prgI, herA, …		gdh, ushA, spoT, spoT, phoB	2015-02-17	0.3265491975362997			soil	431546	USA		circular	397837304	-1004458825	USA			Bacilli (91061)	Bacillaceae (186817)	Bacillus (1386)	Bacillus thuringiensis serovar kurstaki str. HD-1	Bacillales (1385)	Bacillota (1239)	Bacillus_thuringiensis (1428)	Bacillus_thuringiensis_serovar_kurstaki_str._HD-1 (1261129)	Bacteria (2)	-2.71737e+16	-45150766	GCF_000717535.1	35.3	MOBL	mobilizable	0	5
NZ_CP007740.1	68999	35.8	0	0	0	85	3	12	0	0	0	0	0	0	herA, bppU, amiE, yjiB, tetR, parA, copG, pcrA, traM, bclI, gerA, radC, sufI, copZ, ccdA, ccdA, tVP38, ompR, merR		phoB	2015-02-06	0.3580486673719909			soil sample, enrichment culture methanol as carbon source	68999	USA: Minnesota area		circular	480690686	-911083076	USA,Minnesota area			Bacilli (91061)	Bacillaceae (186817)	Bacillus (1386)	Bacillus methanolicus MGA3	Bacillales (1385)	Bacillota (1239)	Bacillus_methanolicus (1471)	Bacillus_methanolicus_MGA3 (796606)	Bacteria (2)	8977407000000000	18246262	GCF_000724485.1	38.7	MOBL	mobilizable	0	1
NZ_CP008842.1	204468	52.0	0	0	0	229	2	25	0	2	1	0	0	0	terB, lhr, repA, repA, copA, copB, hutG, hutI, hutU, proV, proV, proW, hutD, hutC, hutF, gcvA, traX, traI, traD, traT, traS, traG, traH, trbF, trbB, traQ, traF, traN, trbC, traU, traW, trbI, traC, traV, traP, traP, traB, traK, traE, traL, traA, traJ, finP, traM, hipB, psiB, ssb, ydaB, areA, ychA, yhdJ, lexA, umuC, relE, umuC, sopA, intM, tnp, tnp, xerD, silE, silS, silR, silC, silF, silB, silA, c…	phnO, phnE, ptxB, phnC	phoH, RegX3, phoB, ptxD, ptxC, ptxB, phnC	2015-01-21	0.520473041709054			soil	204468	South Korea: Maripo beach		circular	36.78	126.14		IncFII(pKP91)_1, CP000966,	IncF RST(K17:A-:B-):FIA(-);FIB(-);FIC(-);FII(-);FIIK(17);FIIS(-);FIIY(10?)	Gammaproteobacteria (1236)	Enterobacteriaceae (543)	Klebsiella (570)	Klebsiella michiganensis	Enterobacterales (91347)	Pseudomonadota (1224)	Klebsiella_michiganensis (1134687)		Bacteria (2)	0.45737454	2323284	GCF_000724525.1	56.1	MOBF	mobilizable	4	7
NZ_CP009606.1	312478	32.7	1	0	0	294	1	52	0	0	0	0	0	0	clpP, ycaP, spoVAE, spoVAD, spoVAC, trnR, xerC, spoIVCA, spoIVCA, ydeE, gerAC, tnp, ppaX, ltrA, gntR, nrdI, cesH, thiF, ltrA, lepB, holA, ltrA, dnaN, merR, traM, traG, ltrA, tcpC, ltrA, merR, marR, hamA, hamB, dinB, tnpB, ftsK, yajC, dnaX, tnp, tnp, arsA, arsD, arsC, arsB, arsR, arsR, marR, tniQ, tnsA, thiS, copZ, copZ, arsR, lgt, yhjQ, parB, ehuA, spoIIP, tctB, gshB, fghA, frmA		phoB	2015-02-12	0.3270054211816512			soil	312478	USA: WI, Madison (University of Wisconsin-Madison)		circular	430407879	-893953702	USA,WI,Madison (University of Wisconsin-Madison)			Bacilli (91061)	Bacillaceae (186817)	Bacillus (1386)	Bacillus cereus	Bacillales (1385)	Bacillota (1239)	Bacillus_cereus (1396)		Bacteria (2)	-22407515	-47980113	GCF_000835185.1	35.5	MOBL	mobilizable	0	1
NZ_CP010420.1	132372	61.9	0	0	0	144	0	39	0	0	0	0	1	0	dnaJ, ppx, ppk1, ompR, ppk2, doxX, msrP, msrQ, lysR, parA, PrrB_RsmZ, PrrB_RsmZ, parB, blaOXA, uvrD, gntR, kfrA, lysR, traL, mobH, csb2, cas3u, recT		ppx, ppk	2015-01-21	0.6187940047744236			soil	132372	USA	cell culture	circular	397837304	-1004458825	USA			Gammaproteobacteria (1236)	Pseudomonadaceae (135621)	Azotobacter (352)	Azotobacter chroococcum NCIMB 8003	Pseudomonadales (72274)	Pseudomonadota (1224)	Azotobacter_chroococcum (353)	Azotobacter_chroococcum_NCIMB_8003 (1328314)	Bacteria (2)	61870317	-2887742	GCF_000817975.1	66.3	non-mob	non-mob	0	2
NZ_CP010421.1	311724	62.7	0	0	0	324	1	53	0	0	0	0	0	0	lysR, kfrA, tnp, hxlR, tnpA, lacI, ssuD, pdxI, tauA, tonB, tolQ, exbD, yfcL, lysR, fabG, doxX, araC, araC, katG, yfcL, cobM, cbiG, cbtA, cbtB, cobW, cobN, chlI, chlD, cobF, cobG, cbiE, lysR, ycfA, copG, oprD, betA, tnp, romA, oprD, csa3, parB, parA, umuC, umuD, marR, orfB, parW, cobS, traN, recT, pbsX, chpB, relB, mobH, rhaS, traL, traE, traK, traB, traV, lysR, vapC, vapC, vagC, parB, dltA, mbaA,…		ugpC	2015-01-21	0.6267146578383441			soil	311724	USA	cell culture	circular	397837304	-1004458825	USA			Gammaproteobacteria (1236)	Pseudomonadaceae (135621)	Azotobacter (352)	Azotobacter chroococcum NCIMB 8003	Pseudomonadales (72274)	Pseudomonadota (1224)	Azotobacter_chroococcum (353)	Azotobacter_chroococcum_NCIMB_8003 (1328314)	Bacteria (2)	6220621599999990	-2912844	GCF_000817975.1	66.3	non-mob	non-mob	0	1
NZ_CP010578.1	232994	33.7	0	0	0	222	3	30	0	0	1	0	0	0	ltrA, ltrA, herA, prgI, yicC, ant(4')-I, manA, bglG, tetR, ant(4')-I, aadD1, gspF, gspF, cpaB, merR, tubR, tubZ, traG, ltrA, traD, tnpB, topX, hfq, tnp, istB, aimR, mqsR, tnp, umuC, marR, tnp		ptsH, phoP	2015-03-09	0.3370573364865039			soil	232994		whole organism	circular						Bacilli (91061)	Bacillaceae (186817)	Bacillus (1386)	Bacillus thuringiensis	Bacillales (1385)	Bacillota (1239)	Bacillus_thuringiensis (1428)		Bacteria (2)	-28499465	-4746251999999990	GCF_000940785.1	35.3	MOBL	mobilizable	0	2
NZ_CP010957.1	322226	61.1	0	0	0	348	0	70	0	0	0	0	0	0	xerD, parB, ubiC, pilZ, vapC, mscL, vapC, arsR, ssb, copG, mobF, uspA, mreB, marR, gdhA, rnk, tnp, cfa, metB, lysR, hmpA, tatC, phnA, araC, sigJ, paaI, ompA, lysR, mauE, traG, traH, traF, traN, trbC, traU, traW, traC, traV, traB, traK, traE, traL, traA, pbsX, glmM, comF, mucR, spoIVCA, wecC, wecB, capD, glmS, parD, cysI, lprI, glmU, yacA, tnp, mucR, cpaB, cpaC, tadA, tadB, tadC, parB, rlpA, mscS,…		guaB, pckA, gcd	2015-03-05	0.6114124868880848			soil	322226	China:Nanjing	cell culture	circular	3.2061e+16	1.18792e+16	China,Nanjing			Alphaproteobacteria (28211)	Sphingomonadaceae (41297)	Sphingobium (165695)	Sphingobium sp. YBL2	Sphingomonadales (204457)	Pseudomonadota (1224)	Sphingobium_sp._YBL2 (484429)		Bacteria (2)	6540365	-3533295	GCF_000943805.1	64.8	MOBQ	mobilizable	0	3
NZ_CP011515.1	262673	67.9	4	0	3	217	0	13	0	0	0	0	0	0	cydB, hisM, rhaT, norV, djlA, ugpQ, gGDEF, curA, araC, rhsA, epsD, epsE, epsF, mrp, xrtB, epsI, oafA, cysE, rfaB, bcsA, wecG, wcaK, wcaA, rfbX, wbbJ, nolL, wcaA, wcaG, ugd, kdsA, wecB, rfbC, rfbA, rfbD, rfbB, wecC, cpsB, galE, wcaJ, ubiJ, ubiB, sctS, sctR, fliN, hrpE, sctC, yopN, escV, yscD, fliI, kfrA, flhB, escT, mnaT, sctJ, putP, aspS, ddpA, ureH, mdoH, mdoG, atoC, baeS, lysR, caiB, leuA, tctC…	ugpQ, phoX	glpQ, ppk, ppx, phoX	2016-08-18	0.6792780377122887			forest soil	262673	China: Mt. Zijing, Nanjing, Jiangsu	Bacterium from forest soil.	circular	3206167	11877778	China,Mt. Zijing,Nanjing,Jiangsu			Betaproteobacteria (28216)	Sphaerotilaceae (2975441)	Mitsuaria (65047)	Mitsuaria sp. 7	Burkholderiales (80840)	Pseudomonadota (1224)	Mitsuaria_sp._7 (1658665)		Bacteria (2)	6108635	-36893501	GCF_001653795.1	68.3	non-mob	non-mob	2	4
NZ_CP012100.1	509170	32.7	0	0	0	480	6	72	0	0	0	0	0	0	ltrA, radC, mafB, tnpB, purR, narK, iolG, iolC, iolA3, iolD, iolE, fba, iolB, tnpA, umuC, tnp, tar, rfbG, wcaG, rfbF, tnpA, orfB, spsB, pseC, pseG, pseH, pseI, fadH2, pspE, graR, yycF, xerS, gshB, fghA, frmA, aceA, copY, lolD, allC, pucR, mmuM, mmuP, arsR, nAGPA, mgtE, ftsW, menH, baeS, ompR, sdaC, sdaAA, sdaAB, lrp, potE, hfq, tnp, cynS, rodA, ftsI, rpoE, yxdL, tnp, ampC, tauE, yrhO, hfq, arsR, …		phoP, phoR, RegX3, phoB, RegX3, gntK, gnd, phoR, phoB, spoT	2015-08-13	0.3271009682424338			soil sample	509170	China: Sichuan	whole organism	circular	305000001	1024999999	China,Sichuan			Bacilli (91061)	Bacillaceae (186817)	Bacillus (1386)	Bacillus thuringiensis	Bacillales (1385)	Bacillota (1239)	Bacillus_thuringiensis (1428)		Bacteria (2)	-24062076	-4599012999999990	GCF_001182785.1	35.4	MOBL	mobilizable	0	10
NZ_CP012101.1	337579	33.2	0	0	0	326	6	63	0	1	0	0	0	0	tnp, tnp, tnp, galU, wcaL, tnp, tnp, mgtE, mgtA, manA, argR, rimL, tdcB, ftsK, lolD, vanR, prsA, tnp, hlyD, fosB, bclA, glsA, brnQ, gerAA, gerAC, mutT, hfq, tnpC, comP, padR, deoR, ftsN, hfq, abrB, arsR, irrE, copG, merR, virB4, ltrA, traM, traM, aimR, tnp, tnp, aprE, tnp, rpoE, ftsI, tnp, cwlD, vanR, vanS, vanY, tnp, tnp		phoB, RegX3	2015-08-13	0.3324614386558405			soil sample	337579	China: Sichuan	whole organism	circular	305000001	1024999999	China,Sichuan			Bacilli (91061)	Bacillaceae (186817)	Bacillus (1386)	Bacillus thuringiensis	Bacillales (1385)	Bacillota (1239)	Bacillus_thuringiensis (1428)		Bacteria (2)	-24808614	-46366663	GCF_001182785.1	35.4	MOBL	mobilizable	0	2
NZ_CP012748.1	2555069	62.4	1	0	0	2230	2	121	0	2	0	0	0	0	hpxZ, atzE, potD, gntR, nodT, adeB, asnC, aroQ, aroE, caiB, maoC, yfcG, araC, prpF, acnD, prpC, prpB, prpR, araC, lysR, ethD, hpaC, fhuC, lysR, mutT, srmB, tolA, araJ, actP, lysR, dppD, ggt, lysR, citM, pdxI, tetR, dinB, ahpD, lysR, iclR, potC, ahpC, gabP, icmH, tssK, tssJ, tssB, tssC, tssE, tssF, tssG, tssH, tssA, tssM, lysR, lysR, glcB, glcG, hpaG, hpaE, hpaD, hpaH, marR, dppB, nikE, lysR, potA…	ugpB, ugpE, phoU, phnY, phnW	purB, phoB, gnd, gnl, ppc, phoB, guaB, gcd, phoU, phoB, phoB, ugpC, phoX, phny, phnA, phnW	2015-11-09	0.6241083900278231			soil	2555069	Thailand		circular	148971921	10083273	Thailand			Betaproteobacteria (28216)	Burkholderiaceae (119060)	Paraburkholderia (1822464)	Paraburkholderia caribensis MBA4	Burkholderiales (80840)	Pseudomonadota (1224)	Paraburkholderia_caribensis (75105)	Paraburkholderia_caribensis_MBA4 (1323664)	Bacteria (2)	60123935	-3643756	GCF_000522545.2	63.2	MOBP	mobilizable	5	16
NZ_CP013419.1	375023	60.8	0	0	0	382	3	68	0	0	0	0	0	0	pilP, pilS, flhC, tnpB, copG, mcjB, copG, tnpB, groL, ppsA, hypA, hypF, hupF, hypD, hypE, acsA, pdhA, tetR, isrK, vapB, vapC, tnp, cyaE, istB, copG, istA, copG, tnpB, lysB, hicB, hicB, azlC, azlD, tnp, tnpB, insH, tssA, virG, tssB, tssC, tssE, tssF, tssG, tssH, pipB2, tssJ, tssK, dotU, impL, araC, sicP, bopA, bopE, tnpB, insH, xerC, aspT, aspT, tnp, istB, istA, pflB, pflA, pta, btsR, eutB, sopB, …		pps, phoB	2017-04-27	0.6083546875791618			soil	375023	Australia: Northern Territory		circular	-19.49	132.55				Betaproteobacteria (28216)	Burkholderiaceae (119060)	Burkholderia (32008)	Burkholderia savannae	Burkholderiales (80840)	Pseudomonadota (1224)	Burkholderia_savannae (1637837)		Bacteria (2)	5293966999999990	-365959	GCF_001524445.2	67.2	MOBP	mobilizable	0	2
NZ_CP013426.1	249331	61.4	0	0	0	215	2	50	0	0	0	0	0	0	xerD, cysD, tnp, pilS, pilP, pulD, virB10, virB9, trbF, spo0J, parA, xerD, tnpB, tnp, tnp, jmjC, ycaO, tnp, tnp, marR, tnpB, iclR, tnp, tnp, dctP, dctQ, istA, gntR, istB, tnp, tolC, hlyD, tnp, tnp, asnC, mdeB, naiP, tnpB, tnp, tra5, tnp, istB, adhE, bioA, potA, potB, potC		ugpC	2018-04-09	0.6142156410554644			soil	249331	Australia: Northern Territory		circular	-19.49	132.55				Betaproteobacteria (28216)	Burkholderiaceae (119060)	Burkholderia (32008)	Burkholderia sp. MSMB0856	Burkholderiales (80840)	Pseudomonadota (1224)	Burkholderia_sp._MSMB0856 (1637869)		Bacteria (2)	5.31384e+16	-3625258	GCF_001524645.2	66.6	MOBP	mobilizable	0	1
NZ_CP013744.1	288836	69.9	0	0	0	292	2	77	0	0	0	0	0	0	cas2, merR, ccsB, cadC, resC, dsbA, lspA, efeU, efeB, copY, ftsW, kfrA, xerC, arsR, ehuA, mscS, tetR, copG, uspA, gspF, gspF, rapZ, ftsK, ftsK, espC, whiB, gntR, gntR, lexA		phoA	2016-01-06	0.6991268401445803			soil	288836	China: Changsha		circular	281979483	11297133	China,Changsha			Actinomycetes (1760)	Streptomycetaceae (2062)	Streptomyces (1883)	Streptomyces sp. CdTB01	Kitasatosporales (85011)	Actinomycetota (201174)	Streptomyces_sp._CdTB01 (1725411)		Bacteria (2)	72762785	-30453975	GCF_001484565.1	71.6	non-mob	non-mob	0	1
NZ_CP014276.1	314776	62.3	1	0	0	275	0	11	0	0	0	0	0	0	tnp, ethD, lacI, merR, nikE, dppC, dppB, ddpA, eutG, fadR, pdxA, dapA, selA, iclR, ridA, dppD, dppC, dppB, ddpA, lacI, ugpC, lysR, catC, catA, pcaD, araC, ridA, lysR, iacB, marR, nikE, dppC, dppB, ddpA, glpR, gph, fbpB, potA, afuA, ompR, smvA, tetR, fhaC, csgD, yzzA, ywqK, betA, livK, gloA, ubiH, lysR, pcaH, livH, rutF, caiA, menH, tdh, livM, livF, livG, livK, fabG, tetR, tetR, araC, lysR, dabB, …	ugpC, ugpC	gntK, gnl, phoB	2016-03-09	0.62311294380766			petroleum-contaminated soil with high salinity	314776	China: crude oil-polluted saline soil in Shengli Oilfield, Shandong province	petroleum-contaminated soil with high salinity	circular	3633333	118.25	China,crude oil-polluted saline soil in Shengli Oilfield,Shandong province			Alphaproteobacteria (28211)	Aurantimonadaceae (255475)	Martelella (293088)	Martelella sp. AD-3	Hyphomicrobiales (356)	Pseudomonadota (1224)	Martelella_sp._AD-3 (686597)		Bacteria (2)	7379946	-4207146	GCF_001578105.1	62.4	MOBQ	mobilizable	2	3
NZ_CP014277.1	166530	59.0	0	0	0	174	0	21	0	0	0	0	0	0	vagC, vapC, csa3, repA, repB, repC, exeA, spoIVCA, csa3, lysR, ldhA, phnE, phnD, phnC, tnpB, xerD, ctaD, coxB, uspA, lspA, mntR, phnC, phnE, dsbE, argG, czcD, lspA, ccdA, sco1, czcD, zntA, dsbB, merR, phnE, phnE, phnC, pstC, pstA, pstB, phoU, ompR, arsR, arsB, arsH, arsC, vbhA, fIDO, pA5055, molR, virD4, traD, traC, traA, dotD, dotC, pilT, cadA, ygaA, traW	phnE, phnD, phnC, phnC, phnE, phnE, phnE, phnC, pstC, pstA, pstB, phoU	ptxD, ptxC, ptxB, phnC, phnC, phnE, phnE, phnC, pstS, pstC, pstA, pstB	2016-03-09	0.5902119738185312			petroleum-contaminated soil with high salinity	166530	China: crude oil-polluted saline soil in Shengli Oilfield, Shandong province	petroleum-contaminated soil with high salinity	circular	3633333	118.25	China,crude oil-polluted saline soil in Shengli Oilfield,Shandong province			Alphaproteobacteria (28211)	Aurantimonadaceae (255475)	Martelella (293088)	Martelella sp. AD-3	Hyphomicrobiales (356)	Pseudomonadota (1224)	Martelella_sp._AD-3 (686597)		Bacteria (2)	72415266	-4435044	GCF_001578105.1	62.4	MOBQ	mobilizable	12	12
NZ_CP014572.1	316012	62.3	0	0	0	344	2	90	0	0	0	0	0	0	istB, grxC, parB, tetR, aceA, aceB, argA, lysR, acs, eat, tynA, adhE, atzB, lpd, atzC, trbC, istA, istB, ridA, tauA, ssnA, trbC, terC, terC, dedA, paaI, marR, tnp, sulP, merR, merR, nhaA, lysM, ccdA, gntR, frmR, pspE, tauE, pspE, trxA, pspE, degQ, virD4, trbL, flhG, hicB, marR, copG, parA, asnC, lgt, frmR, pspE, dedA, atpE, dedA, merR, merA, istB, arsC, czcD, trxB, wzb, merR, arsR, cadA, lspA, co…		RegX3	2021-03-18	0.6231946888092857			Soil cores containing cogon grass roots	316012	China: Shandong, weifang Prefecture, dajiawa town	cell culture	circular	3712544000000000	11907162				Actinomycetes (1760)	Micrococcaceae (1268)	Arthrobacter (1663)	Arthrobacter sp. D5-1	Micrococcales (85006)	Actinomycetota (201174)	Arthrobacter_sp._D5-1 (1477518)		Bacteria (2)	65119176	-26307566	GCF_017357425.1	62.8	non-mob	non-mob	0	1
NZ_CP014598.1	274486	65.4	0	0	0	247	0	15	0	0	0	0	0	0	lysR, dctM, wcaG, lysR, ddpA, dppB, dppC, nikE, oprB, fadH2, dadA, fliJ, motA, fkbM, tadD, ompR, motB, rpoD, flgD, fliL, flgH, flgA, flgG, flgF, flgE, flgK, flgL, ompR, flgI, flgJ, flgN, flgL, flaF, flbT, fliG, fliP, fliN, fliH, fliF, fliL, fliM, motE, mdlB, fiu, araC, arfB, tauB, tauC, ssnA, glcD, tauA, mdaB, acrR, ridA, ilvE, gntR, argD, srkA, lysR, adhE, dadA, purU, soxG, fadH2, soxD, dadA, gl…	ugpE, ugpB, gcd, pstB	gcd	2016-08-17	0.6541171498728533			mangrove soil	274486	Malaysia: Perak		circular	421335	10064708999				Alphaproteobacteria (28211)	Roseobacteraceae (2854170)	Salipiger (263377)	Salipiger sp. CCB-MM3	Rhodobacterales (204455)	Pseudomonadota (1224)	Salipiger_sp._CCB-MM3 (1792508)		Bacteria (2)	75582156	-39606757	GCF_001687105.1	65.6	MOBQ	mobilizable	4	1
NZ_CP014599.1	280527	65.2	0	0	0	258	1	9	0	0	0	0	0	0	dppD, dppC, dppB, ddpA, fadR, wcaE, wcaA, bcsA, rfbX, wcaJ, oafA, rfaL, bglS, wcaA, wcaA, bglS, wza, gumC, wcaA, wcaA, yqjQ, glcD, gtrA, serB, yeiH, dctP, dctQ, dctM, rutF, ydhF, ssuD, mngR, mviM, cutS, coxL, fhuE, araC, cwlJ, ubiE, yndB, uvrD, thiF, thiE, thiG, thiS, dadA, nadA, nadB, nadC, dnaJ, cbpM, dctP, dctQ, pepP, gntR, argE, serA, gntR, pxpC, pxpB, pxpA, ilvE, aspB, dapA, fabG, zigA, purR…	gcd	phoB, pps	2016-08-17	0.6523436246778385			mangrove soil	280527	Malaysia: Perak		circular	421335	10064708999				Alphaproteobacteria (28211)	Roseobacteraceae (2854170)	Salipiger (263377)	Salipiger sp. CCB-MM3	Rhodobacterales (204455)	Pseudomonadota (1224)	Salipiger_sp._CCB-MM3 (1792508)		Bacteria (2)	7476239	-413734	GCF_001687105.1	65.6	MOBQ	mobilizable	1	2
NZ_CP015006.1	534207	63.2	0	0	0	479	2	19	0	0	0	0	0	0	repA, repB, repC, lsrR, rhaD, glpR, xylB, ccmA, araH, araH, rbsB, rhaD, xylB, nagD, rhaI, rhaM, araD, malK, ugpE, ugpA, ugpB, nagC, nanE, gntR, urtE, urtD, urtC, urtB, urtA, yqjQ, ppro0129, chrR, lysR, adhE, allD, proX, proW, proV, nagC, argE, rbsB, rbsB, araH, yhfX, mglA, lysR, nit2, rraA, potD, potA, potB, potC, ddpA, dppB, ridA, iclR, selA, oppF, scpB, aF2118, rES, queD, aRO8, livK, livH, livM…	ugpE, ugpA, ugpB, ugpB, ugpA, ugpE, phnK, phnY	pgtC, ptxD, ppc, phny, ugpC, phny, phnA, phnW, ptsI	2016-08-18	0.6320752068018577			soil	534207	USA	cell culture	circular	397837304	-1004458825	USA			Alphaproteobacteria (28211)	Phyllobacteriaceae (69277)	Aminobacter (31988)	Aminobacter aminovorans	Hyphomicrobiales (356)	Pseudomonadota (1224)	Aminobacter_aminovorans (83263)		Bacteria (2)	7177916000000000	-4189083	GCF_001605015.1	63.5	MOBQ	mobilizable	8	9
NZ_CP015007.1	451547	60.6	0	0	0	452	1	53	0	0	0	0	0	0	repA, repB, ctRNA_p42d, repC, napH, gcvT, potE, rutF, glnA, acrR, menH, caiA, ampS, rutF, nit2, ycgM, gntR, araC, oCDMu, ridA, dadA, adhE, pucG, ilvA, dsd1, oCDMu, ridA, dadA, potD, potA, potC, rutF, tra5, istB, istA, gntR, ntaA, ntaB, dapD, lysR, mmsB, hyi, araD, otnK, ltnD, leuB, dadA, yigB, ddpA, dppB, dppC, dppD, dppD, insO, kduD, ugpE, lacF, ugpB, kduI, yesR, purR, hipA, xRE, mgtA, eCM27, cy…	ugpE, ugpB	ugpC, ugpC	2016-08-18	0.6064839319052059			soil	451547	USA	cell culture	circular	397837304	-1004458825	USA			Alphaproteobacteria (28211)	Phyllobacteriaceae (69277)	Aminobacter (31988)	Aminobacter aminovorans	Hyphomicrobiales (356)	Pseudomonadota (1224)	Aminobacter_aminovorans (83263)		Bacteria (2)	70239463	-43083267	GCF_001605015.1	63.5	MOBQ	mobilizable	2	2
NZ_CP015439.1	258230	43.2	14	0	1	275	0	22	0	0	0	0	0	0	luxR, skfF, skfB, skfA, luxR, comX, ispA, ycaO, luxR, tnpB, comX, trmB, pheT, pheS, spoU, sspI, frvX, rplT, rpmI, infC, thrS, ytxC, dnaI, nrdR, speD, gapA, coaE, mutM, polA, phoP, RAGATH-18, orfB, insH, ltrA, maoC, mdh, icd, citZ, ytvI, fxsA, pyk, pfkA, accA, accD, gntR, dnaE, ytrI, ytoI, orfB, argH, argG, ackA, tpx, ytfJ, sspA, ezrA, hisJ, rpsD, tyrS, acsA, acuC, ccpA, aroF, ftsA, ytxJ, ampS, mu…	phoP	phoR, phoP, pyk, pckA	2016-08-18	0.4315106687836424			soil	258230	Antarctica: Mount Rittmann	Microbial isolate	circular	-735093525	163367408	Antarctica,Mount Rittmann			Bacilli (91061)	Bacillaceae (186817)	Anoxybacillus (150247)	Anoxybacillus amylolyticus	Bacillales (1385)	Bacillota (1239)	Anoxybacillus_amylolyticus (294699)		Bacteria (2)	-0.43319649	-4431539	GCF_001634285.1	43.7	non-mob	non-mob	1	4
NZ_CP015530.1	224533	67.3	0	0	0	217	3	63	0	0	0	0	0	0	tnpB, ltrA, lysM, vbhA, pqqD, mcjB, scbR, mobF, traM, prgI, parA, parB, xerD, xerD, iclR, sucB, copG, yrhK, cheY, ctaD, marR, dnaC, copG		phoB	2016-08-12	0.6725292050611714			PCBs contaminated soil	224533	China:Zhejiang	soil	circular	290000001	1199999999	China,Zhejiang			Actinomycetes (1760)	Nocardiaceae (85025)	Rhodococcus (1827)	Rhodococcus sp. WB1	Mycobacteriales (85007)	Actinomycetota (201174)	Rhodococcus_sp._WB1 (1033922)		Bacteria (2)	71104765	-23001626	GCF_001700945.1	70.6	MOBF	mobilizable	0	1
NZ_CP015882.1	1459374	60.3	4	0	3	1395	7	199	0	0	0	0	0	0	repA, repB, ctRNA_p42d, repC, spoIVCA, zapB, hipB, dcm, vsr, malK, ampC, gatA, nuoJ, nuoK, hyfB, hyfB, nuoM, nuoN, nuoA, nuoB2, nuoC2, nuoD2, nuoE, nuoF, nuoG, nuoI, nuoH, atoC, xth, nhaP, livK, yncE, ccmA, yadH, tauA, tauC, tauB, gcd, hisJ, frmA, gfa, emrA, bcsA, higA, higB, gloB, lysR, yajL, dsd1, gsiA, dppD, lysR, ddpA, dppB, dppC, ampC, bioF, dppA, rES, cspC, msrP, purR, ugpB, ugpA, ugpE, sac…	gcd, ugpB, ugpA, ugpE, phnD, ugpB, ugpA, ugpE, ugpE, ugpA, ugpB, ugpA, ugpE, ugpB, ugpB, ugpA, ugpE, ugpE, ugpA, ugpB, ugpA, ugpE, ugpB, phnY, ugpE, ugpB, ugpE, ugpA, ugpB, phoD, ugpE, ugpA, ugpB, ugpB, phnK, phnK	gnl, ugpC, ugpE, phoR, phnW, phnA, phny, phoB	2016-06-21	0.6032881221674499			silty clay loam soil (pH 6.1)	1459374	USA: Hagerstown, Pennsylvania		circular	396634258	-7820806309999990	USA,Hagerstown,Pennsylvania			Alphaproteobacteria (28211)	Rhizobiaceae (82115)	Ensifer (106591)	Ensifer adhaerens	Hyphomicrobiales (356)	Pseudomonadota (1224)	Ensifer_adhaerens (106592)		Bacteria (2)	7145455999999990	-4186916	GCF_000697965.2	62.8	MOBQ	mobilizable	36	8
NZ_CP017076.1	1756808	65.3	7	1	6	1438	0	59	0	0	0	0	0	0	cysI, cobH, cobI, cobJ, cobK, cobL, cbiG, cobM, cobF, tauD, acrR, fepA, cphB, lrp, srtA, csa3, spoIVCA, tnpB, asmA, ligD, ykoV, cytC553, ctaG, ctaD, coxB, coxL, cutB, cutS, gstA, nosY, ccmA, fhuE, rlmJ, rfaL, araJ, fecR, cirA, hemO, tonB, tnp, istB, cirA, attH, ycbJ, attH, soxR, frmA, cypX, cirA, menE, caiD, hcaE, tetR, fabG, ycgM, acrR, gloA, yesE, catE, ethD, ybjT, yesE, sdhA, fabG, ycbJ, qor, …	gcd, gcd, gcd, gcd, gcd, phoA, gcd, pstS, pstS, pstS, gcd	phoP, phoB, phoB, phoP, gcd, phoB, gcd, pit, phoP, phoB, phoB, pstS, phoB, phoP, phoP, ppdK, phoB, phoB, ptsI, gcd	2016-09-23	0.6526837309484018			soil	1756808	Hungary	single cell	linear	471817585	195060937	Hungary			Alphaproteobacteria (28211)	Sphingomonadaceae (41297)	Novosphingobium (165696)	Novosphingobium resinovorum	Sphingomonadales (204457)	Pseudomonadota (1224)	Novosphingobium_resinovorum (158500)		Bacteria (2)	69550276	-38322458	GCF_001742225.1	65.6	MOBQ	mobilizable	11	20
NZ_CP017077.1	960805	63.0	0	0	0	968	6	160	0	0	0	0	0	0	nirB, tauA, fabG, menH, qdoI, gloA, iclR, hcaE, uhpC, iclR, adhE, aspD, ilvB, bglX, fepA, fabG, curA, fadB, fadK, fabG, ethD, caiD, caiA, ycbJ, cirA, araJ, aidB, paaJ, aidB, csgD, acrR, fabG, fabG, yurZ, ydfG, fabG, caiD, oprB, ycbJ, caiA, paaJ, acrR, ethD, bdcA, rpoE, osmC, lpd, racX, fes, lysR, ethD, yqjQ, menH, gloA, aes, xerD, tra8, araC, araC, menH, rpoE, ybjT, yciW, lysR, fabG, araC, fabG, …	gcd	phnC, gdh	2016-09-23	0.6301216167692716			soil	960805	Hungary	single cell	circular	471817585	195060937	Hungary			Alphaproteobacteria (28211)	Sphingomonadaceae (41297)	Novosphingobium (165696)	Novosphingobium resinovorum	Sphingomonadales (204457)	Pseudomonadota (1224)	Novosphingobium_resinovorum (158500)		Bacteria (2)	6745572599999990	-3674748	GCF_001742225.1	65.6	MOBQ	mobilizable	1	2
NZ_CP017078.1	354886	61.4	0	0	0	376	2	43	0	0	0	0	1	0	repA, spo0J, parA, hipA, xRE, rpoD, argA, arsH, cytB, tolC, cusA, acrA, baeS, ompR, ccc1, arsR, ahpC, gloB, yedE, tauE, appC, cydB, xerC, cypX, acrR, cypX, cirA, csgD, imuB, dnaE, pEBP, tadA, sRAP, spoIVCA, ctaG, arsR, ahpC, gloB, yedE, yedE, tauE, trxA, dsbC, ushA, acfC, appC, cydB, lysR, yeiH, msrP, sapB, arsR, msrP, lysR, mdh, tnp, istB, sUL1, citT, rodA, nhaA, lysR, ynfA, arsR, wzb, arsC, ars…		phoB	2016-09-23	0.6138365559644505			soil	354886	Hungary	single cell	circular	471817585	195060937	Hungary			Alphaproteobacteria (28211)	Sphingomonadaceae (41297)	Novosphingobium (165696)	Novosphingobium resinovorum	Sphingomonadales (204457)	Pseudomonadota (1224)	Novosphingobium_resinovorum (158500)		Bacteria (2)	6605575599999990	-3.5008e+16	GCF_001742225.1	65.6	MOBQ	mobilizable	0	1
NZ_CP017303.1	393079	62.0	0	0	0	408	2	82	0	0	0	0	0	0	moxR, maoC, paaI, tetR, whiB, iacB, zapB, vbhA, nhaA, uvrA, fdhA, araC, tnp, lysR, istB, narI, narJ, narH, ygiN, glxA, fdxA, arsR, luxR, sigF, merR, tniB, tniQ, copG, flgN, crp, trxA, clpB, merR, grpE, dnaK, degQ, iclR, doxX, glxA, ygiN, istB, yihY, yagT, mazF3, flgM, merR, uspA, uspA, devR, marR, cspC, merR, tetR, espR, irrE, ripA, virB4, tcpE, cpaE, cdiI, cadA, cadA, copC, lnt, resB, istB, tnp,…		phoP	2017-01-16	0.6198550418618141			soil	393079		pure culture	linear						Actinomycetes (1760)	Nocardiaceae (85025)	Rhodococcus (1827)	Rhodococcus sp. YL-1	Mycobacteriales (85007)	Actinomycetota (201174)	Rhodococcus_sp._YL-1 (1045808)		Bacteria (2)	71912827	-2436001	GCF_001942025.1	62.5	non-mob	non-mob	0	1
NZ_CP017304.1	339489	61.2	0	0	0	336	1	86	0	0	0	0	0	0	dprA, copG, parA, copG, lysM, recA, Ms_IGR-7, lysR, fabG, maoC, Ms_IGR-7, tniB, tniQ, istB, crcB, fluC, eno, mutS, ftsK, tetR, yagT, istB, tnp, doxX, iclR, ecsC, merR, gmd, dltA, tnp, tnp, istB, arsR, lspA, ctaD, copC, lnt, resB, tlpA, tlpA, merR, ccsB, whiB, phoU, arsR, cadA, cadA, copC, lnt, resB, istB, tnp, csoR, lspA, cadA, arsR, merR, aseR, arsB, htpX, trxB, arsD, arsA	phoU	phoU, phoP	2017-01-16	0.6116103909110457			soil	339489		pure culture	linear						Actinomycetes (1760)	Nocardiaceae (85025)	Rhodococcus (1827)	Rhodococcus sp. YL-1	Mycobacteriales (85007)	Actinomycetota (201174)	Rhodococcus_sp._YL-1 (1045808)		Bacteria (2)	7234022	-24334729	GCF_001942025.1	62.5	non-mob	non-mob	1	2
NZ_CP019063.1	549463	52.4	0	0	0	492	3	42	0	0	0	0	0	0	tssF, tssA, vasK, tssH, hcp, ompA, tssL, tssK, tssC, tssB, pAS, tetR, qacE, araC, fabG, tetR, iscR, acrB, acrA, araC, eamA, kduD, rpiB, qdoI, tolB, proP, amyA, hscC, fbaB, btsR, yjiA, ybdD, cstA, srfB, srfA, araJ, rhaT, gldA, melB, mgtA, otsB, otsA, bglB, araC, ptsG2, pTR2, tetR, stbD, rcnB, araC, melB, citA, dcuR, fumA, yfdV, sfcA, impA, araJ, mtr, luxR, znuB, znuB, znuC, znuA, mntR, ehuA, hisM,…	gcd, gcd	lysR, RegX3, gcd, ugpC	2018-03-04	0.5239388275461678			soil	549463	India: West Sikkim, East Rathong Glacier	bacteria	circular	27.34	8805999999				Gammaproteobacteria (1236)	Yersiniaceae (1903411)	Rahnella (34037)	Rahnella sikkimica	Enterobacterales (91347)	Pseudomonadota (1224)	Rahnella_sikkimica (1805933)		Bacteria (2)	2.75251e+16	0.43321335	GCF_002951615.1	53.0	MOBF	mobilizable	2	4
NZ_CP019641.1	329482	44.8	0	0	0	345	1	97	0	0	0	0	0	0	ecsC, radC, nagA, nagB, phnF, virD4, mobQ, mobC, lepB, repC, coiA, xerS, mazF, mazE, copZ, asnB, traG, prgI, dnaN, ltrA, merR, traM, gspF, tadB, ltrA, ltrC, ltrA, merR, merA, relE, ligA, exeA, xerS, fhuF, pstB, phoU, pstA, pstC, wrbA, abrB, metH, corA, ggt, swrC, spoIVCA, copG, abrB	phnF, pstB, phoU, pstA, pstC	phoA, phoA, pstB, pstA, pstC, pstS, glpQ, ugpC	2017-02-20	0.4484281387147097			crude oil-contamination soil	329482	China:Qaidam Basin	whole organism	circular	378800081	934885025	China,Qaidam Basin			Bacilli (91061)	Planococcaceae (186818)	Planococcus (1372)	Planococcus lenghuensis	Bacillales (1385)	Bacillota (1239)	Planococcus_lenghuensis (2213202)		Bacteria (2)	9565828	-23306797	GCF_001999905.1	48.8	non-mob	non-mob	5	8
NZ_CP020539.1	959196	63.0	4	1	3	944	16	75	0	1	0	0	0	0	dmpG, asnC, mmsB, cinA, hemN, fixJ, ccoN, ccoO, ccoP, ccoG, fixH, fixI, ccoS, araC, tolC, mdtA, tnp, tnp, kleA, klcB, klcA, dinJ, lysR, tetR, tnp, tnp, sdpA, lysR, tetR, tnp, tnp, sdpA, lysR, tetR, tnp, lysR, tnp, chrA, chrB, ydcH, tnp, tnp, tfdF, tfdR, tfdD, cadR, cadA, cadC, pcaF, cadC, tnpB, orfB, tnp, tnp, sldA, mgtC, cinA, tdh, maoC, ssrA, rodA, uspA, yjdF, cydB, arsR, sulP, proP, thpD, ectB…		gcd, phoP, ppc	2017-04-08	0.6301298170551171			soil	959196	Austria	cell culture	circular	472000338	13199959	Austria			Alphaproteobacteria (28211)	Sphingomonadaceae (41297)	Sphingobium (165695)	Sphingobium herbicidovorans	Sphingomonadales (204457)	Pseudomonadota (1224)	Sphingobium_herbicidovorans (76947)		Bacteria (2)	6612348	-34939773	GCF_002080435.1	62.5	MOBQ	mobilizable	0	3
NZ_CP020744.1	460379	32.8	1	0	0	456	6	69	0	1	0	0	0	0	ampC, tnp, tar, tnp, mphM, map, hfq, czcR, mgtE, mgtA, yjcZ, fbpA, xerS, nAGPA, mgtE, ftsW, Bacillus-plasmid, hfq, cDA1, qdoI, ltrA, tnp, eamA, graR, sdaC, sdaAA, sdaAB, tnp, rocF, tnpA, mutT, copG, tnp, dnaJ, hfq, tnp, tnp, pbsX, hfq, ycaO, nrdI, pqqD, mafB, padR, yfbU, arpU, dut, yqaJ, fbpA, irrE, ltrA, traM, traG, ltrA, ltrA, traG, tnp, tnp, tnp, ftsK, yxeA, rimL, tnp, pseC, rsfA, yxeA, tnpA, …		phoB, dut, dut, phoR, phoB	2017-04-24	0.3280818629868			soil	460379	China:Zhuaxixiulong township, Tianzhu county, Wuwei city.	whole organism	circular	3792672	10263202	China,Zhuaxixiulong township,Tianzhu county,Wuwei city.			Bacilli (91061)	Bacillaceae (186817)	Bacillus (1386)	Bacillus mycoides	Bacillales (1385)	Bacillota (1239)	Bacillus_mycoides (1405)		Bacteria (2)	-21439571	-45917606	GCF_002104575.1	35.6	MOBL	mobilizable	0	5
NZ_CP020926.1	220037	63.7	0	0	0	230	0	38	0	0	0	0	0	0	phnA, aarF, pilZ, groES, groL, rpoH, kch, himA, hipA, yhaH, mobF, virD4, copG, labA, ssb, tonB, citT, yubB, dps, katE, aNKYR, kfrA, mauE, copD, copC, lysR, tetR, thsB, pilZ, yncB, ardC, spo0J, xerD, mprF, virJ, speE, yoaK, degQ, parA, marR, spoIVCA, spoIVCA, ligD, xth, yjlB, top1, fabG, fixJ, yjbI, tehB, hmp, uspA, mnhG, cadC1, paaI, dnaJ, merR, tdh, yajL, uvrA, frmA, ompR, mreB, gdhA, rnk, cspC,…		pckA, phoB, pckA	2018-04-09	0.6369383330985243			soil	220037	China: Caidian District, Wuhan, Hubei		circular	304960087	1.14158e+16	China,Caidian District,Wuhan,Hubei			Alphaproteobacteria (28211)	Sphingomonadaceae (41297)	Sphingobium (165695)	Sphingobium yanoikuyae	Sphingomonadales (204457)	Pseudomonadota (1224)	Sphingobium_yanoikuyae (13690)		Bacteria (2)	6553988	-3.50876e+16	GCF_001078495.2	64.4	MOBQ	mobilizable	0	3
NZ_CP021438.1	172221	33.5	0	0	0	174	7	37	0	0	0	0	0	0	tnp, tnp, tnp, tnp, cry21Aa, tnp, istB, tyrS, tnp, tnp, xpaF1, bclA, istB		phoA, phoA	2019-01-06	0.3350810876722351			soil	172221	China	soil sample	circular	344118455	860326902	China			Bacilli (91061)	Bacillaceae (186817)	Bacillus (1386)	Bacillus thuringiensis	Bacillales (1385)	Bacillota (1239)	Bacillus_thuringiensis (1428)		Bacteria (2)	-2.40319e+16	-51056337	GCF_003991175.1	35.4	MOBL	mobilizable	0	2
NZ_CP022363.1	836998	69.5	4	0	3	666	0	38	0	3	0	0	0	0	tctB, fabG, walK, hisJ, marR, ybcV, gdhA, fixJ, tonB, exbD, exbB, rlpA, lytS, btsR, cstA, frvX, ngg, asnB, aRO8, nimA, lysR, bioA, mmsA, gntR, terC, tctA, tctB, tctC, wcaK, rfaB, rfaB, ubiE, wcaE, emrA, arpD, galE, marR, acrR, menE, gntR, caiA, mmsB, iclR, livG, fAA1, livM, livF, paaK, adhE, aidB, paaJ, caiA, mmdA, caiD, pccA, leuA, uspA, fixX, fabG, bglB, bglB, yddA, bglB, celF, argE, cheC, ompR…	ugpB, ugpE, ugpA, gcd, ugpB, ugpA, ugpE	ugpC, ugpC	2018-05-30	0.6949765710312329			paddy soils	836998	Japan: Tokyo	single cell	circular	3469686420000000	1394049033	Japan,Tokyo			Alphaproteobacteria (28211)	Azospirillaceae (2829815)	Azospirillum (191)	Azospirillum sp. TSH58	Rhodospirillales (204441)	Pseudomonadota (1224)	Azospirillum_sp._TSH58 (664962)		Bacteria (2)	7006258	-37529552	GCF_003119115.1	69.0	non-mob	non-mob	7	2
NZ_CP022366.1	660876	69.7	12	0	6	573	3	38	0	0	0	0	0	0	gntR, kduD, qdoI, dctP, dctM, dctQ, pdxI, gntR, mgsA, uxaC, uxaA, lysR, tctC, tctC, tctB, tctA, terC, uspA, ompR, afuA, ccoG, fbaA, yvrE, ppc, aRO8, ccoG, nahD, ompR, ridA, paaI, thiG, thiS, thiO, mgtE, spoIIAA, trnL, lipB, acyP, ctaD, coxB, cytC553, nlpA, menE, abcC, metP, nlpA, galM, mtlD, modA, epsI, sufI, acrR, acrA, acrB, ybjT, hxlR, katE, lysR, spoU, yliI, rrf, rrl, trnA, trnI, rrs, uxuA, m…		ppc, pyk, purT, phoB, ppdK, prsA	2018-05-30	0.6973743939861639			paddy soils	660876	Japan: Tokyo	single cell	circular	3469686420000000	1394049033	Japan,Tokyo			Alphaproteobacteria (28211)	Azospirillaceae (2829815)	Azospirillum (191)	Azospirillum sp. TSH58	Rhodospirillales (204441)	Pseudomonadota (1224)	Azospirillum_sp._TSH58 (664962)		Bacteria (2)	70199604	-3.56989e+16	GCF_003119115.1	69.0	non-mob	non-mob	0	6
NZ_CP022367.1	1910929	69.2	26	0	11	1675	5	120	0	0	0	0	0	0	ntrC, ntrY, ntrC, trkA, ilvE, gph, hfq, hflX, tonB, suhB, mazG, hycG, hycE1, hyfB, hyfE, hyfC, hyfB, tex, pAS, rhtB, ybjQ, mET2, ompR, oppA, gstA, fcbT1, amyA, top1, rsm22, tar, acrA, acrB, lysR, acrB, acrA, lysR, ycsI, dctP, dctM, dctQ, pxpB, pxpC, pxpA, ompR, prfC, asd, glgP, rimI, lysX, rpoE, rsiW, rhaT, crp, baeS, ompR, bamE, iscR, sufB, sufC, sufD, sufS, iscU, paaD, iscA, pepN, cyc7, folK, u…	ugpE, ugpA, ugpB, ugpB	guaA, guaB, phoP, ptsI, ptsH, ptsH, phoB, pckG, purC, ugpC, pit, phoB, phoB, gmk, ndk, purN, purM, ppk, ugpC, gnd, gntK, dcd, pyk, spoT	2018-05-30	0.6917677213543779			paddy soils	1910929	Japan: Tokyo	single cell	circular	3469686420000000	1394049033	Japan,Tokyo			Alphaproteobacteria (28211)	Azospirillaceae (2829815)	Azospirillum (191)	Azospirillum sp. TSH58	Rhodospirillales (204441)	Pseudomonadota (1224)	Azospirillum_sp._TSH58 (664962)		Bacteria (2)	71143303	-35986457	GCF_003119115.1	69.0	non-mob	non-mob	4	24
NZ_CP022369.1	568757	69.8	0	0	0	505	2	18	0	0	0	0	0	0	fhuB, tetR, lysR, oqxB, araC, fhuE, fepC, fepB, fhuB, mdlB, ubiU, nnrS, tatA, copZ, nosD, nosZ, nosR, norD, norB, dctP, cysE, groL, rraA, tctB, ehuA, eamA, tauA, betC, tauD, dctP, lysR, cheY, hPtr, ddpA, mmsB, araC, fabG, rpoE, fecR, fiu, piuB, lysR, ddpA, dppB, dppC, nikE, ridA, speB, argE, arcD, arsR, uspA, pimA, ppsA, mgtA, tnp, fecR, hydA, dapA, artP, xylB, xylA, ridA, lysR, tauD, acrA, acrB,…		pps, ugpC	2018-05-30	0.697793609573157			paddy soils	568757	Japan: Tokyo	single cell	circular	3469686420000000	1394049033	Japan,Tokyo			Alphaproteobacteria (28211)	Azospirillaceae (2829815)	Azospirillum (191)	Azospirillum sp. TSH58	Rhodospirillales (204441)	Pseudomonadota (1224)	Azospirillum_sp._TSH58 (664962)		Bacteria (2)	71494913	-36941457	GCF_003119115.1	69.0	non-mob	non-mob	0	2
NZ_CP022999.1	1569179	59.2	2	0	0	1431	3	69	0	0	0	0	0	0	bcsA, bcsN, fhuB, norM, lysA, fba, deoR, araH, ccmA, deoR, derI, epsO, lysR, queC, queD, queE, arsR, ethD, lacI, araC, dhaL, dhaK, dhaL, dhaK2, xylG, gntR, psiF, frmA, lacI, deoR, mglA, oCDMu, pepT, potC, potB, gntR, gntR, ugpA, ugpE, ugpC, araC, macB, macB, ompR, fkbM, fkbM, tnp, tnpB, yghU, ar14, yjiS, thiM, thiD, uppP, oiaX, apnO, rbsB, rbsA, araH, dhaK, dhaL, yurM, ugpC, trkA, eamA, lysR, glx…	ugpA, ugpE, ugpC, ugpC, ugpE, ugpC, ugpE, ugpC, phnX, phnL, phnK, phnI, phnH, phnG, phnF, ugpC, ugpE	gnl, gnl, gntK, gcd, ugpC, RegX3, ugpC, ugpC, ugpC, ugpC, ppk, phoB, phoB, ugpC, ugpC, ugpC, phnX, phoB, phnL, phnK, phnJ, phnI, ugpC, nrdE, nrdE, nrdF	2017-09-01	0.5920873271946667			agricultural soil	1569179	Philippines: Los Banos	Cell culture	circular	141667	1212167				Alphaproteobacteria (28211)	Rhizobiaceae (82115)	Rhizobium (379)	Rhizobium sp. 11515TR	Hyphomicrobiales (356)	Pseudomonadota (1224)	Rhizobium_sp._11515TR (2028343)		Bacteria (2)	6787493700000000	-4217655000000000	GCF_002277895.1	59.8	MOBQ	mobilizable	17	26
NZ_CP023000.1	1497349	58.8	0	0	0	1402	13	111	0	0	0	0	1	0	ftsK, mutT, coxB, trbK, yciE, ugpC, ugpE, ugpA, ugpB, lacI, mutT, yciE, gcvA, tdiR, nirC, sulP, fecR, rhiA, copG, lysR, lysR, lysR, lysR, lysR, cheR, cheB, hxlR, cheW, adhP, tnp, hemN, cydX, cydB, cydD, cadA, rve, rve, araC, araC, gntR, tssM, icmH, tssK, tssG, tssF, tssE, tssC, tssC, tssB, tssA, tssH, hcp, vgrG, gloA, menH, yqjQ, lysR, eamA, araC, ndvB, marR, gntR, ugpA, ugpE, glcG, lysR, lrgB, l…	ugpC, ugpE, ugpA, ugpB, ugpA, ugpE, ugpA, ugpE, ugpE, ugpC, ugpE, ugpA, ugpE, ugpE, ugpC	gcd, pit, ugpC, ugpE, ugpA, ugpB, ugpB, ugpC, phoR, RegX3, ugpC, ugpC, ugpC, ugpC, phoB, ugpC, ugpC, ugpC, pyk, ugpC, RegX3	2017-09-01	0.5879524412812244			agricultural soil	1497349	Philippines: Los Banos	Cell culture	circular	141667	1212167				Alphaproteobacteria (28211)	Rhizobiaceae (82115)	Rhizobium (379)	Rhizobium sp. 11515TR	Hyphomicrobiales (356)	Pseudomonadota (1224)	Rhizobium_sp._11515TR (2028343)		Bacteria (2)	6.69712e+16	-40760784	GCF_002277895.1	59.8	MOBQ	mobilizable	15	21
NZ_CP023549.1	860520	68.3	5	0	3	774	7	107	0	0	0	0	0	0	selD, ilvD, egtB, egtD, fabI, ugpC, ugpE, ugpA, ugpB, livH, livF, livG, livK, lysR, ompR, lprI, copG, yceI, lacI, xylF, mglA, xylH, ydfG, bluB, cutA, degQ, ompR, gloA, gsiA, dppC, dppB, ddpA, hlyD, rsgA, metN, metP, nlpA, lysR, fabG, cysT, cysW, cysA, asnC, metN, acs, osmC, tnp, tnp, istA, istB, parD, orfA, istB, istA, tnp, czcD, cpaB, cpaF, potC, potB, potD, potA, gntR, iscR, rarD, fur, fabA, fa…	ugpC, ugpE, ugpA, ugpB, ugpE	ugpC, ugpE, ugpA, ugpB, ugpC, RegX3, adk, phnD_phosphite, phoB, phoH, cmk	2017-10-04	0.6834600009296704			paddy soil	860520	China: Chenzou city, Hunan province	cell culture	circular	2766667	111.75	China,Chenzou city,Hunan province			Alphaproteobacteria (28211)	Paracoccaceae (31989)	Rhodobacter (1060)	Rhodobacter sp. CZR27	Rhodobacterales (204455)	Pseudomonadota (1224)	Rhodobacter_sp._CZR27 (2033869)		Bacteria (2)	73964167	-39487255	GCF_002407205.1	68.5	non-mob	non-mob	5	11
NZ_CP023738.1	285280	66.0	1	0	0	201	1	19	0	0	0	0	0	0	rtcA, hicB, spoIVCA, repC, ctRNA_p42d, repB, repA, ureG, hupE, ureF, ureE, ureC, 5_ureB_sRNA, ureB, ureA, ureH, urtE, urtD, urtC, urtB, urtA, codB, citB, vapC, vagC, pksD, pksD, pksD, pksD, fabG, pksD, pksD, pksD, pksD, fabB, pksG, caiD, caiD, stbD, vapC, yrpB, aarF, sfp, pksD, fabD, qor, qor, soxB, soxZ, rve, phd, vapC, spoIVCA, rve, trbC, relE, yiaG, dotG, dotH, istA, rve, fhuE, fecR, rpoE, yhh…	phnD	phoB	2017-11-09	0.6602811273135165			soil	285280	United Kingdom:Warwick	isolate	circular	52279527	-15844827	United Kingdom,Warwick			Alphaproteobacteria (28211)	Methylocystaceae (31993)	Methylosinus (425)	Methylosinus trichosporium OB3b	Hyphomicrobiales (356)	Pseudomonadota (1224)	Methylosinus_trichosporium (426)	Methylosinus_trichosporium_OB3b (595536)	Bacteria (2)	68685207	-38103402	GCF_002752655.1	66.0	non-mob	non-mob	1	1
NZ_CP024907.1	403765	59.7	0	0	0	434	7	115	0	0	0	0	0	0	yfcF, nthB, nthA, ltrA, relB, imuA, lysR, istA, istB, flhC, pilV, pilS, pulF, pilP, pilL, trbI, trbG, virB8, parB, tniQ, tnsA, marR, yajO, yfcG, araC, oprM, lysR, tetR, lysR, nmrA, fadR, araC, kup, parB, imuA, ompA, tnp, tnpB, ecsC, lysR, huxB, merR, putP, dinB, araC, tnp, ccdA, ccdB, yajC, araC, tolC, insH, tctD, qseC, marR, pyk, leuB, lysR, pgrR, nepI, araC, ssuD, araC, lrp, lpdA, aceF, lysE, l…		phoB, pyk, adk	2018-07-23	0.5965796936336729			soil	403765	Netherlands: Hoeven		circular	5.1351e+16	43444				Betaproteobacteria (28216)	Burkholderiaceae (119060)	Paraburkholderia (1822464)	Paraburkholderia caledonica	Burkholderiales (80840)	Pseudomonadota (1224)	Paraburkholderia_caledonica (134536)		Bacteria (2)	5638948	-35178573	GCF_003330745.1	62.3	MOBQ	mobilizable	0	3
NZ_CP024936.1	494503	60.5	0	0	0	503	4	85	0	0	0	0	0	0	lysR, nikE, lysR, frmA, fadH, dsbA, tetR, yhfA, araC, aldA, dmpG, tnp, tnp, xylB, nmrA, lysR, hutU, hutH, lysR, qseB, qseC, creA, ibpA, phbB, mntH, uspA, uspA, citB, hpnK, hpnI, qseB, hpnI, hpnJ, lysR, araJ, umuC, imuA, tnpB, ltrA, kynA, ridA, ridA, araJ, ethD, tnpC, tnpB, tetR, ethD, ethD, bdcA, higB, parB, virB9, traI, pilN, pilO2, pilP, pulF, flhC, parB, thiF, cpaF, virB3, virB4, traI, traD, s…		phoB, phoB	2018-07-23	0.6049589183483215			soil	494503	Netherlands: Hoeven		circular	5.1351e+16	43444				Betaproteobacteria (28216)	Burkholderiaceae (119060)	Paraburkholderia (1822464)	Paraburkholderia graminis	Burkholderiales (80840)	Pseudomonadota (1224)	Paraburkholderia_graminis (60548)		Bacteria (2)	5532896	-34849966	GCF_003330785.1	63.3	MOBH	mobilizable	0	2
NZ_CP024940.1	1235162	59.6	0	0	0	1353	17	346	0	0	0	0	0	0	eamA, tnpC, istA, istB, cheB, cheB, cheB, motB, fliG, asnC, paaJ, glxA, glxA, trpC, kfrA, cspG, rfbD, rfbC, rfbA, rfbB, galU, tetR, vapC, lysR, dctA, chrR, maoC, fixA, fixB, iclR, pntA, rraA, lysR, marR, nadC, yceI, yceI, marR, lysR, lysR, dinB, sfnR, msuE, sfnG, lptB, livH, gstA, yciW, araC, gntR, nmrA, yqjQ, araC, ykgJ, mobC, parB, parB, parA, parB, Betaproteobacteria_toxic_sRNA, luxR, trbL, tr…	phoU	phoB, phoU, phoB	2018-07-23	0.596063512316603			soil	1235162	Netherlands: Hoeven		circular	5.1351e+16	43444				Betaproteobacteria (28216)	Burkholderiaceae (119060)	Paraburkholderia (1822464)	Paraburkholderia hospita	Burkholderiales (80840)	Pseudomonadota (1224)	Paraburkholderia_hospita (169430)		Bacteria (2)	57239304	-36265874	GCF_003330805.1	62.7	MOBQ	mobilizable	1	3
NZ_CP025114.1	285478	60.8	0	0	0	321	1	55	0	0	0	0	0	0	uvrD, prlF, merR, merT, merA, tetR, tetR, ardC, argG, padR, arsH, arsB, arsC, nhaA, lasI, ssb, virB2, virB3, virB4, virB6, virB8, virB9, virB10, virB11, traG, doxX, qseC, dsbA, insE, virB10, virB11, traG, hipA, soxB, ynfA, cnrA, traM, pilZ, chrB, crcB, nfeD, qseC, yncE, lysR, dsbA, qseC, tetR, xdhC, moxR, coxL, coxS, cutB, tnp, pcaH, pcaG, istA, paaJ, luxR, copG, repC, pA5055, repC, tniB, tniQ, r…		phoB, phoB	2017-12-13	0.6081029010992091			agricultural soil	285478	South Korea: agricultural soil in Cheongju	whole organism	circular	3663722	12748972	South Korea,agricultural soil in Cheongju			Alphaproteobacteria (28211)	Nitrobacteraceae (41294)	Bradyrhizobium (374)	Bradyrhizobium sp. SK17	Hyphomicrobiales (356)	Pseudomonadota (1224)	Bradyrhizobium_sp._SK17 (2057741)		Bacteria (2)	7141394999999990	-4727192	GCF_002831585.1	64.7	MOBQ	mobilizable	0	2
NZ_CP026266.1	367312	63.1	0	0	0	319	0	8	0	0	0	0	0	0	hisJ, potC, potB, potA, potD, fadR, caiD, qor, fadR, iorA, repA, repB, repC, xerD, cmpR, artQ, glnM, artM, speB, potB, ydcV, cysA, yibF, fimA, argE, cmpD, ssuC, ssuE, hutG, traA, xerC, tnp, tnp, potD, potB, potC, potA, czcD, yciW, gpsA, dgoD, rbsB, araG, araH, bepC, wcaL, kpsD, ywqD, tuaB, tuaC, czcO, lrp, cmpD, ssuC, folE, rspA, pepP, ssnA, dadA, glcB, glcG, panE, dpaA, allB, pptA, pncA, gntR, r…	phnY, phnK, ugpE, ugpA, ugpB	ptxD, ppc, phny, phnA, phnW, ugpC	2018-04-28	0.6306627608136952	GEUS Denmark		soil from courtyard of a former plant nursery located above a BAM-contaminated aquifer	367312	Denmark: near Hvidovre	bacterial isolate	circular	5565719	1247364	Denmark,near Hvidovre			Alphaproteobacteria (28211)	Phyllobacteriaceae (69277)	Aminobacter (31988)	Aminobacter sp. MSH1	Hyphomicrobiales (356)	Pseudomonadota (1224)	Aminobacter_sp._MSH1 (374606)		Bacteria (2)	7275405999999990	-4205466	GCF_003071665.1	63.2	MOBQ	mobilizable	5	6
NZ_CP026382.1	67707	62.3	0	0	0	80	0	15	0	0	0	0	0	0	traK, traL, traM, kfrC, parB, parA, trfB, kleE, copG, ssb, trbB, trbC, trbD, virB4, trbF, trbG, trbI, trbJ, trbL, tnp, uspA, pcaF, iclR, tnp, tnp, istB, opdA, fliT, spoIVCA, traD, topB, traF, traG, traI, traJ		opd	2018-03-04	0.6232738121612241			sewage &amp; soil	67707	USA	Environmental isolate	circular	397837304	-1004458825	USA			Alphaproteobacteria (28211)	Sphingomonadaceae (41297)	Sphingopyxis (165697)	Sphingopyxis sp. MG	Sphingomonadales (204457)	Pseudomonadota (1224)	Sphingopyxis_sp._MG (1866325)		Bacteria (2)	64474773	-3.39248e+16	GCF_002953155.1	66.5	MOBQ	mobilizable	0	1
NZ_CP026546.1	197700	59.5	0	0	0	236	2	103	0	0	0	0	0	0	copV, parA, parB, repB, brnA, tetR, istB, tnp, ardR, dsbD, tctB, lysR, ldhA, phnE, phnD, phnC, 5_ureB_sRNA, lysR, moxR, gmtY, gmtX, iclR	phnE, phnD, phnC	ptxD, ptxC, phnD_phosphite, phnC, ptxD	2018-03-01	0.5948305513404147			soil	197700	South Korea	single cell	linear	365581914	1279408564	South Korea			Betaproteobacteria (28216)	Burkholderiaceae (119060)	Cupriavidus (106589)	Cupriavidus metallidurans	Burkholderiales (80840)	Pseudomonadota (1224)	Cupriavidus_metallidurans (119219)		Bacteria (2)	5490403700000000	-3.01401e+16	GCF_002944765.1	63.8	MOBQ	mobilizable	3	5
NZ_CP028970.1	365485	60.1	1	0	0	362	2	48	0	0	0	0	0	0	gntR, lysR, maoC, lysR, gntR, fumA, lysR, ccmA, puuE, metC, lysR, lysR, tnpA, lysR, tnp, traF, scpB, vapC, repC, repB, repA, ehuB, luxR, traL, virB3, virB4, yifL, virB6, virB8, virB9, virB11, trnR, traA, mobC, parA, copG, yubB, gntR, tetR, tnp, lysR, tctB, ethD, gntR, maoC, nthA, nthB, cbtA, tnp, tnp, lysR, frmA, iclR, yciI, ugpC, tnp, ligA, dctP, iclR, cbtA, nthA, gntR	ugpC	ugpC	2018-04-26	0.6014528640026267			Dichlobenil-treated soil sampled from the courtyard of a former plant nursery located above a BAM-contaminated aquifer near Hvidovre	365485	Denmark: Hvidovre	Soil	circular	556441712	124772091	Denmark,Hvidovre			Alphaproteobacteria (28211)	Phyllobacteriaceae (69277)	Aminobacter (31988)	Aminobacter sp. MSH1	Hyphomicrobiales (356)	Pseudomonadota (1224)	Aminobacter_sp._MSH1 (374606)		Bacteria (2)	7131647599999990	-44248195	GCF_003063555.1	63.2	MOBQ	mobilizable	1	1
NZ_CP029211.1	366221	66.9	0	0	0	333	0	16	0	0	0	0	0	0	gcvT, acoR, amtB, purU, ycgI, czcD, pAS, narQ, narL, emrE, gmhA, gCD1, gmhB, ompV, marR, viaA, soxR, hsdM, marR, xerD, nhaA, acrR, emrE, motB, mocA, xdhC, coxL, cutS, araC, gdhA, stbD, gloA, fabG, pAS, rpfG, gloA, mll0975, rhtB, arsA, arsH, arsC, bcsZ, bcsS, bcsA, katG, modE, bisC, fdhD, vapB6, vapC, ecsC, eamA, tag, glgX, udg4, rRM, infA, cheY, nhaA, ugpQ, gspG, pulF, pilB, pilO, pulD, pulG, pul…	ugpQ, gcd, gcd	glpQ, ppdK, pit, nrdD, nrdD	2018-05-12	0.6691342113095644			soil	366221	South Korea	cell culture	circular	365581914	1279408564	South Korea			Betaproteobacteria (28216)		Aquabacterium (92793)	Aquabacterium olei	Burkholderiales (80840)	Pseudomonadota (1224)	Aquabacterium_olei (1296669)		Bacteria (2)	6848026299999990	-3762345	GCF_003100395.1	67.3	non-mob	non-mob	3	5
NZ_CP030074.1	969901	69.0	1	0	0	799	2	132	0	0	0	0	0	0	jetD, lysE, deoR, ssgA, yozG, lytR, padR, luxR, gntR, copD, copC, srp102, murJ, eamA, pepN, mngR, yopX, luxR, solA, lacF, ligA, tcrA, coxE, moxR, tetR, merR, sigE, ltrA, cimA, asnB, ltrA, ccmA, mazG, marR, ykuD, luxR, tatC, tatA, wrbA, trnfM, ubiE, cdiI, luxR, nreB, paaX, lysR, osmC, spoVK, eccC, eccD, eccB, yitT, gntR, arsR, ssuD, thiJ, araC, araC, marR, tetR, osmC, potA, ycaO, jmjC, hlyD, drrA,…		phoB, phoB, phoB, phoP	2018-07-13	0.6904941844580014			soil	969901	China:XiangTan	Whole organism	circular	27681864	112626292	China,XiangTan			Actinomycetes (1760)	Streptomycetaceae (2062)	Streptomyces (1883)	Streptomyces cadmiisoli	Kitasatosporales (85011)	Actinomycetota (201174)	Streptomyces_cadmiisoli (2184053)		Bacteria (2)	69055886	-36371164	GCF_003261055.1	70.9	non-mob	non-mob	0	4
NZ_CP030772.1	967890	67.9	1	0	0	999	3	238	0	0	0	0	0	0	degU, liaS, liaS, tniQ, terF, ssgG, tcpE, yafL, parB, xerD, mcjB, exuR, mazG, ydbC, afsR, tcpC, ripA, ptlH, gspF, lysM, tnp, racP, racO, xerD, istA, kfrA, xerD, lysM, ftsH, ispG, dxs, racP, xerD, racO, ltrA, ltrA, ltrA, ltrA, insH, ASpks, fabL, insH, tnp, tniQ, Ms_IGR-7, racP, racO, ASpks, fabD, pksI, pksH, pksG, pksF, acpK, ppsA, ASpks, insH, xerC, tnp, irrE, xerC, novR, corA, insH, lsrG, yraA, …		ndk, phoB, phoB	2019-06-08	0.6790337744991682			soil	967890	China: rainy forest in Xishuangbanna	pure culture	linear	21.5	1007667				Actinomycetes (1760)	Streptomycetaceae (2062)	Streptomyces (1883)	Streptomyces sp. YIM 121038	Kitasatosporales (85011)	Actinomycetota (201174)	Streptomyces_sp._YIM_121038 (2136401)		Bacteria (2)	7159573599999990	-31261597	GCF_006088715.1	72.9	non-mob	non-mob	0	3
NZ_CP031069.1	626394	32.2	0	0	0	585	18	99	0	0	0	0	0	0	sTE14, yeiB, traG, traM, cpaB, gspF, gspF, arsR, tnpB, prgI, herA, gntR, cspD, bsrC, tnp, yxeA, marR, merR, tnp, tnp, arsR, gntR, eamA, dltA, sbnA, sbnB, ampC, ampC, gntR, eamA, vanZ, hfq, rimI, ampC, araJ, acrR, tnpB, araC, araC, arsR, dinB, norM, rimI, tatD, eboC, ydiL, fabF, bcsA, tnpB, flgG, yxeA, tetR, xerS, yycF, sleB, xpaF1, galU, cotS, tnp, prpF, asnB, folD, orfB, marR, tnpB, merR, echA8,…		RegX3	2019-09-14	0.3219954214120825			soil	626394	Poland: Jasienowka, farmland	cell culture	circular	525320622	229636847	Poland,Jasienowka,farmland			Bacilli (91061)	Bacillaceae (186817)	Bacillus (1386)	Bacillus sp. JAS24-2	Bacillales (1385)	Bacillota (1239)	Bacillus_sp._JAS24-2 (2217832)		Bacteria (2)	-27165856	-45234976	GCF_008274905.1	35.3	MOBL	mobilizable	0	1
NZ_CP031070.1	277779	32.7	1	0	0	281	12	95	0	0	0	0	0	0	tnp, tnp, tnpB, marR, ftsZ, lolD, vanZ, ydcF, lolD, tyrS, tyrP, tdc, thiD, nhaC, ltrA, lgt, ltrA, ftsW, mgtE, tnp, yitT, xerS, marR, ald, tdcB, potE, ytaF, mgtE, psiE, tnpB, fbpA, ltrA, tnp, yxeA, recA, recA, trnI, tnp		phoB	2019-09-14	0.3266085629223231			soil	277779	Poland: Jasienowka, farmland	cell culture	circular	525320622	229636847	Poland,Jasienowka,farmland			Bacilli (91061)	Bacillaceae (186817)	Bacillus (1386)	Bacillus sp. JAS24-2	Bacillales (1385)	Bacillota (1239)	Bacillus_sp._JAS24-2 (2217832)		Bacteria (2)	-26404002	-46802044	GCF_008274905.1	35.3	MOBL	mobilizable	0	1
NZ_CP031072.1	394614	33.7	0	0	0	358	6	32	0	1	0	0	0	0	merR, tnp, yfkO, gntR, tnp, umuC, ftsK, yxeA, ampC, cxxC, gloB, yesE, acrR, asnB, tnpA, immA, xpaF1, gerPF, recU, arpU, tnp, tnp, pseC, pseG, pseH, pseI, abrB, hfq, dltA, solG, gerPA, arpU, xerD, dltB, tetR, tnp, tnp, czcR, ompR, phoP, yxeA, tnpB, xerS, tnp, hfq, xpaF1, sbnB, ridA, lysA, uvrA, uvrB, ypdA, sbnA, tnp, tnp, tnpB, czcR, sepF, copG, merR, virB4, traM, traM, aimR, map	phoP	dut, phoB, phoB	2019-09-14	0.3368354898711145			soil	394614	Poland: Bialowieza National Park	cell culture	circular	527623571	238674192	Poland,Bialowieza National Park			Bacilli (91061)	Bacillaceae (186817)	Bacillus (1386)	Bacillus mycoides	Bacillales (1385)	Bacillota (1239)	Bacillus_mycoides (1405)		Bacteria (2)	-21767373	-46128893	GCF_008274925.1	35.6	MOBL	mobilizable	1	3
NZ_CP031650.1	520959	53.7	0	0	0	507	2	30	0	0	0	0	0	0	repA, parA, parB, ampR, pagP, chpB, yofA, tdcF, lprI, ydcN, pecS, lysR, purR, ymgB, ycgZ, sitC, lysR, glmU, rpiR, sfnG, rluF, yhjC, gabP, gabT, mocR, clcA, yicS, ssuC, tenA, ascF, ascG, yciT, yybR, yaiC, map, nepI, tetR, rspA, lysR, fetA, fetB, rutR, pagP, fhuE, nikE, ddpC, ulaA, cmtB, ssuD, ehuA, rdgB, bglG, bglF, ugpC, gdhA, merR, ribH, metQ, thiJ, modA, tauA, tauC, ycgI, ampR, rspA, parD, ybjJ…	ugpC, phoP	ugpC, gdh, ugpC	2018-11-05	0.536888699494586			soil core	520959	USA: Alaska, Fairbanks		circular	64875646	-147668981				Gammaproteobacteria (1236)	Erwiniaceae (1903409)	Pantoea (53335)	Pantoea agglomerans	Enterobacterales (91347)	Pseudomonadota (1224)	Pantoea_agglomerans (549)		Bacteria (2)	24315784	13194864	GCF_003704305.1	55.2	MOBF	mobilizable	2	3
NZ_CP031651.1	182169	52.3	0	0	0	164	2	10	0	0	0	0	0	0	repA, ycgF, ibpB, ycgE, ycgF, yajD, adeB, gsiB, relE, ftrA, yfaZ, feoA, feoB, ssuD, ssuD, yahO, yibH, pqiB, arnF, arnE, arnT, arnD, arnA, arnC, arnB, purR, tolC, luxR, fimC, tetR, fabF, yiaT, swrC, ynfL, budA, alsS, citM, yefM, uvrA, tnp, tnp, ydaF, aroQ, aroQ, scrR, ptsG2, parB		phoB	2018-11-05	0.5230088544154055			soil core	182169	USA: Alaska, Fairbanks		circular	64875646	-147668981				Gammaproteobacteria (1236)	Erwiniaceae (1903409)	Pantoea (53335)	Pantoea agglomerans	Enterobacterales (91347)	Pseudomonadota (1224)	Pantoea_agglomerans (549)		Bacteria (2)	-11676824	5868405	GCF_003704305.1	55.2	MOBF	mobilizable	0	1
NZ_CP032054.1	1051520	71.9	0	0	0	938	14	276	0	1	0	0	0	0	repL, dapF, gntR, tnp, lxmK, citB, lxmA, calU8, strR, tebC, unbU, unbV, unbL, lysM, gudD, eamA, rfbB, staN, staG, staD, staP, staJ, staK, rimK, argJ2, speB, yjgF, lysR, marR, glpP, lepB, mauE, rox, ahpD, uspA, mtrY, ccmA, degT, djlA, arsR, afsA, tpx, aph(6)-I, arsR, yokL, tetR, parB, parA, scbR, tetR, scbR, ssuE, araC, aceA, aceB, metE, thiI, metF, cobF, mmsB, mmsA, araC, tetR, acbM, cnsA, lpqO, …		phoB, phoB	2018-09-08	0.7188688755325624			soil	1051520	China:Jinan	cell culture	linear	366507007	1171140042	China,Jinan			Actinomycetes (1760)	Streptomycetaceae (2062)	Streptomyces (1883)	Streptomyces clavuligerus	Kitasatosporales (85011)	Actinomycetota (201174)	Streptomyces_clavuligerus (1901)		Bacteria (2)	7778309299999990	-25811944	GCF_003454755.1	72.7	non-mob	non-mob	0	2
NZ_CP032676.1	533287	63.8	0	0	0	497	2	98	0	0	0	0	0	0	ompA, hicA, parA, tetR, copG, yrhK, lpqE, marR, nhaA, uspA, catA, ahpD, cbiQ, amiE, marR, pqqD, vOC, rbsA, torT, istB, ssuD, gntR, menH, nitA, marR, tetR, pucR, estB, lysR, istB, narK, hcaF, hcaE, iclR, caiA, citB, uhpC, fdhD, lacI, prs, thiC, nthB, nthA, nhlF, lysR, mmsA, iclR, mbtG, caiD, nudC, czcD, yrpB, salK, phzF, lysE, hipB, hipA, istB, ycaO, ltrA, ltrA, istB, istA, marR, fahA, araC, lysR,…		phoB, gdh, prsA, gdh	2020-01-17	0.638421712886307			soil	533287	South Africa: Modderfontein	cell culture	linear	-260451	280803				Actinomycetes (1760)	Nocardiaceae (85025)	Rhodococcus (1827)	Rhodococcus rhodochrous	Mycobacteriales (85007)	Actinomycetota (201174)	Rhodococcus_rhodochrous (1829)		Bacteria (2)	7072839699999990	-2.45373e+16	GCF_009883715.1	68.2	non-mob	non-mob	0	4
NZ_CP032703.1	556856	57.9	0	0	0	517	2	36	0	0	0	0	0	0	repA, parA, ssuD, glnQ, hisM, hisJ, ridA, iclR, cof, treC, treB, treR, epsG, scrA, lacI, iclR, rraA, hpxD, lysR, map, ycgZ, glgX, treY, treZ, yjbJ, proP, eamA, gcvA, fdhF, ehuA, yafY, hns, fhuE, lysR, araC, purR, lysE, lysR, nlpC, yncE, rcnB, lysR, ssuD, ehuA, rdgB, mmcQ, ridA, gabP, gabT, lysR, argD, arnB, arnC, arnA, arnD, arnT, arnE, arnF, uraH, merR, malG, malF, malE, malK, lamB, malM, malQ, …	ugpE, ugpC	gnl, gcd, ugpC, RegX3, ugpC, phoB	2019-08-06	0.579214374991021			soil	556856	Singapore:Jurong Island	single isolate	circular	1.25962e+16	1036704713	Singapore,Jurong Island			Gammaproteobacteria (1236)	Erwiniaceae (1903409)	Pantoea (53335)	Pantoea dispersa	Enterobacterales (91347)	Pseudomonadota (1224)	Pantoea_dispersa (59814)		Bacteria (2)	2.59274e+16	13561282	GCF_007833795.1	57.8	MOBF	mobilizable	2	6
NZ_CP032827.1	221615	59.8	0	0	0	252	3	67	0	0	0	0	0	0	cbpM, xpkA, tpiA, tal, rpiA, adhP, rodA, ompA, rnk, uraH, lysR, tolC, marR, lysR, yncE, hmpA, trbM, virB2, virB4, traJ, virB11, crcB, eamA, copG, parA, tnpB, parB, repA, repC, marR, luxR, dnaK, grpE, dnaJ, dnaJ		rpiA, gcd, phoP	2018-10-18	0.597518218532139			soil	221615	Antarctica	whole organism	circular	-794063075	0.3149311999999999	Antarctica			Alphaproteobacteria (28211)	Sphingomonadaceae (41297)	Sphingomonas (13687)	Sphingomonas paeninsulae	Sphingomonadales (204457)	Pseudomonadota (1224)	Sphingomonas_paeninsulae (2319844)		Bacteria (2)	66427712	-36378949	GCF_003660165.1	58.8	MOBQ	mobilizable	0	3
NZ_CP032828.1	849778	58.7	6	0	3	887	3	164	0	0	0	0	0	0	hlyD, trnfM, rrf, rrl, trnA, trnI, rrs, fabG, fabD, rpsF, rpsR, rplI, folE, fecR, oprB, czcA, tolC, cueR, mmsB, gor, pgi, lepB, rnc, era, dapB, nth, trnR, trbG, trbF, trbL, trbJ, trbE, trbC, trbB, copG, traG, rlxS, brnT, gntR, luxR, tnp, iclR, ethD, folE, tnpB, fadR, maoC, lysR, fadR, yozE, luxR, fdhF, fdhD, fghA, gfa, lysR, luxR, gloA, ridA, ridA, dld, istB, lprI, abrB, yhaV, lacI, sirB1, rsgA, …		pit	2018-10-18	0.5872757355450482			soil	849778	Antarctica	whole organism	circular	-794063075	0.3149311999999999	Antarctica			Alphaproteobacteria (28211)	Sphingomonadaceae (41297)	Sphingomonas (13687)	Sphingomonas paeninsulae	Sphingomonadales (204457)	Pseudomonadota (1224)	Sphingomonas_paeninsulae (2319844)		Bacteria (2)	6702817	-3577617	GCF_003660165.1	58.8	MOBQ	mobilizable	0	1
NZ_CP034685.1	199209	32.9	0	0	0	166	3	15	0	0	0	0	0	0	ybjQ, yndE, gerA, cpaB, copG, copG, merR, virB4, traM, traM, merR, aimR, ftsK, arsR, lacI, ptsG2, pfkB, pucR, ald, citB, katE, ybjQ, gerQA, gerQB, gerQC, xerS, lolD, yxeA, vanR, mraW, tnp, acrR, ybjQ, tnp		phoP, phoP, phoB	2019-07-31	0.3293827086125627			soil	199209	Bangladesh	Chromosomal DNA, plasmid DNA	circular	244768783	902932426	Bangladesh			Bacilli (91061)	Bacillaceae (186817)	Bacillus (1386)	Bacillus sp. BD59S	Bacillales (1385)	Bacillota (1239)	Bacillus_sp._BD59S (2499213)		Bacteria (2)	-2.28738e+16	-4674508599999990	GCF_007363175.1	35.4	MOBL	mobilizable	0	3
NZ_CP035038.1	2394395	62.0	1	0	0	2256	13	185	0	1	0	0	0	0	tnpB, marR, rbsC, mglA, lsrC, rbsB, fabF, acrR, acrA, acrB, tetR, iolE, purR, araH, mglA, hyi, yrbE, lysR, araC, yagS, yagR, mloA, ggt, occT, speB, occQ, occP, lysR, araC, pncA, xapX, soxH, menH, rbsB, ccmA, araH, deoR, fbaB, fet4, ligD, cspC, higA, tnp, groES, groL, gcrA, lysR, relB, tnpB, vapC, silP, merR, cbpA, rnk, fsa, nupQ, nupP, nupO, nupN, suhB, ar15, istB, istA, gntR, hxlR, ethD, garR, g…	phnL, phnK, phnJ, phnI, phnH, phnG, phnF, ugpB, ugpA, ugpE, ugpE, ugpE, ugpA, ugpE, ugpC, ugpB, ugpA, ugpE, ugpC, ugpB, ugpA, ugpE, ugpB, ugpA, ugpE, ugpC, phnC, phnD, phnE, phnE, phnM, phnN, ugpE, ugpA, ugpB, ugpE, ugpA, phnP, gcd, ugpB, ugpA, ugpE, ugpB, ugpA, ugpC, ugpE, ugpA, ugpB	gntK, gnl, phnL, phnK, phnJ, phnI, phnH, phnG, ugpC, phoB, ugpC, ugpA, ugpC, ugpB, ugpA, ugpE, ugpC, ugpB, phoB, phnC, phnD, phnE, phnE, phnN, phnM, phnN, ugpC, gcd, phoB, phoB, ugpC, ugpC, nrdF, ugpC	2022-07-31	0.6197381802083616			soil	2394395	Viet Nam: red river	single cell	linear	209677951	1.05902e+16	Viet Nam,red river			Alphaproteobacteria (28211)	Rhizobiaceae (82115)	Sinorhizobium (28105)	Sinorhizobium fredii	Hyphomicrobiales (356)	Pseudomonadota (1224)	Sinorhizobium_fredii (380)		Bacteria (2)	67323666	-4.12351e+16	GCF_024400375.1	62.8	MOBQ	mobilizable	48	34
NZ_CP035039.1	556376	59.0	1	0	0	632	4	119	0	1	0	0	1	0	dprA, vapC, gntR, tetR, cspC, tnp, ltrA, insH, pilZ, mepA, repC, ctRNA_p42d, repB, repA, ardC, vbhA, repC, parB, spoIVCA, tnpR, tnpB, hutG, eptA, copG, traR, rve, rve, rve, ltrA, nopP, rve, ehuA, glnH, garR, lysR, matR, rve, lRR, tniQ, istB, istA, nodS, tnp, istB, tnpB, tniQ, tnpB, tnpR, insE, tnpB, tnp, nodA, nodB, nodC, nodI, nodJ, nolO, noeI, fer, fni, xerC, tnpB, tnp, tnpR, tnpB, xerD, istB, …		phoB, phoB	2022-07-31	0.5902051849828174			soil	556376	Viet Nam: red river	single cell	linear	209677951	1.05902e+16	Viet Nam,red river			Alphaproteobacteria (28211)	Rhizobiaceae (82115)	Sinorhizobium (28105)	Sinorhizobium fredii	Hyphomicrobiales (356)	Pseudomonadota (1224)	Sinorhizobium_fredii (380)		Bacteria (2)	64320893	-4619789599999990	GCF_024400375.1	62.8	MOBQ	mobilizable	0	2
NZ_CP035286.1	889227	67.8	0	0	0	820	0	40	0	0	0	0	0	0	atoC, lpdA, acoB, acoA, lrp, dapA, adhE, lysR, luxR, phnA, atoA, atoD, ampG, gntR, lysR, dctQ, dctM, dctP, purB, pcaG, pcaH, pcaC, pcaD, pobA, pcaQ, ubiH, marR, hpcH, pyrD, dctQ, dctM, dctP, iclR, alsT, pitA, pdxI, rhaT, araJ, doxX, yhaK, arsH, yejR, glxA, aztA, aztB, aztC, aztD, fecR, mocR, tdh, fabG, malK, ugpE, ugpA, ugpB, purR, gatZ, rbsK, araH, xylG, rbsB, gntR, proC, adhE, lysR, fdhA, araC,…	ugpE, ugpA, ugpB, phnC, phnD, phnE, phnE, phnF, phnG, phnH, phnI, phnJ, phnK, phnL, phnN, phnM	ppk, phoX, ugpC, prsA, RegX3, ugpC, ugpC, phoP, ugpC, phnC, phnE, phnE, phnF, phnG, phnH, phnI, phnJ, phnK, phnL, phnN, phnN, phnM	2023-03-15	0.6779213856529323			soil	889227	USA: Texas	whole organism	circular	318160381	-995120986	USA,Texas			Alphaproteobacteria (28211)	Paracoccaceae (31989)	Paracoccus (265)	Paracoccus versutus	Rhodobacterales (204455)	Pseudomonadota (1224)	Paracoccus_versutus (34007)		Bacteria (2)	73514643	-38697052	GCF_029203935.1	67.7	non-mob	non-mob	16	22
NZ_CP035287.1	1740310	67.7	16	1	3	1648	0	64	0	1	0	0	0	0	dnaA, dnaN, recF, xth, iscA, dgt, osmC, prfC, nadK, glyA, marR, hmgA, nodT, adeB, acrA, tetR, tetR, flgL, flgN, fliK, flgD, fepA, fecR, ybdK, yciE, fabG, ssnA, lacI, copG, xerD, trnL, glnK, glnA, purB, fliG, gap, pyrC, pyrE, dnaB, araJ, nlpD, ccmA, coaD, lysR, mmsA, caiA, caiD, mmsB, macB, ilvD, gntT, fadR, dld, lldP, glpC, lutB, lldG, gntR, tam, bioG, bioA, bioD, bioB, dnaA, parA, araC, acs, fab…	pstS, pstC, pstA, pstB, phoU, phoB, ugpE, ugpA, ugpB, ugpC, ugpE, ugpA, ugpB, ugpB, ugpE, ugpA, phnM, ugpE, ugpA, ugpB	purB, pyrE, guaB, gntK, purC, purS, pckA, ptsH, purQ, RegX3, gdh, gnd, ugpC, ugpC, nrdD, nrdD, pstC, pstA, pstB, phoU, phoB, dcd, phoB, purM, purN, gmk, phoR, purD, ppk, purF, ugpC, phoB, pyrH, ugpC, ugpC, ugpE, ugpA, ugpB, purL, nrdE, nrdF, phnM, ugpC, cmk, pyrG, guaA, phoH	2023-03-15	0.6769316960771357			soil	1740310	USA: Texas	whole organism	circular	318160381	-995120986	USA,Texas			Alphaproteobacteria (28211)	Paracoccaceae (31989)	Paracoccus (265)	Paracoccus versutus	Rhodobacterales (204455)	Pseudomonadota (1224)	Paracoccus_versutus (34007)		Bacteria (2)	7297575999999990	-39212718	GCF_029203935.1	67.7	non-mob	non-mob	20	47
NZ_CP035958.1	321896	34.1	0	0	0	311	3	40	0	0	0	0	0	0	tnp, merR, resD, luxR, orfB, dltD, tnp, pdaB, rfbF, rfbG, bclA, umuC, ftsK, tnpB, cxxC, gloB, yesE, ubiE, colA, bclA, pssA, tnp, cls, ywqG, tnpB, tnp, mutT, dinB, tnp, sdaAB, sdaAA, sdaC, arsR, ushA, xerS, sepF, fbpA, ccdC, tnpB, hfq, dinB, dnaK, tnpB, sseB, yezG, essC, essB, yukD, essA, esaA, tnpB, ykuD, tnpA, tnpB, nosD, abrB, salY, lolD, acrA, copG, gntR		phoB, phoR, phoB	2021-06-09	0.3406255436538509			soil	321896	Poland: Bialowieza National Park	cell culture	linear	527623571	238674192	Poland,Bialowieza National Park			Bacilli (91061)	Bacillaceae (186817)	Bacillus (1386)	Bacillus mycoides	Bacillales (1385)	Bacillota (1239)	Bacillus_mycoides (1405)		Bacteria (2)	-2.1781e+16	-461712	GCF_018736705.1	35.7	MOBL	mobilizable	0	3
NZ_CP035963.1	232664	33.6	0	0	0	227	1	35	0	1	0	0	0	0	ftsK, lacI, padR, tnp, tnp, prsA, tnp, tnp, ybjQ, czcR, czcR, tnp, tdcB, ald, dinB, ltrA, tnp, tnp, accA, czcR, tnpB, gatD, murT, ybjQ, tnpB, katE, tnpA, orfB, tnp, tnp, tnpB, repC, tnp		phoP	2021-06-09	0.3361370903964515			soil	232664	Poland: Bialowieza National Park	cell culture	linear	527623571	238674192	Poland,Bialowieza National Park			Bacilli (91061)	Bacillaceae (186817)	Bacillus (1386)	Bacillus mycoides	Bacillales (1385)	Bacillota (1239)	Bacillus_mycoides (1405)		Bacteria (2)	-22933273	-4668556	GCF_018736725.1	35.7	MOBL	mobilizable	0	1
NZ_CP035964.1	361734	33.0	0	0	0	375	7	55	0	0	0	0	0	0	traM, tcpC, trbC, ltrA, ltrA, merR, marR, ubiE, bclA, colA, ftsK, tnp, tnpB, orfB, tnp, tnp, purR, narK, iolG, iolC, iolA3, iolD, iolE, fba, iolB, yajC, hfq, ltrA, xoxI, xoxI, tnp, tnpB, tnpB, xpaF1, xerS, nosD, tnp, sdaC, sdaAA, sdaAB, copY, dinB, yvrH, recU, phoP, yrzO, ald, pucR, tnp, araJ, acrR, ltrA, cls, bsrC, cdnL, pdaB, tnp, yjjG, marR, yndE, tnp, lepB, tolA, tnp, traM	phoP	phoB, phoP	2021-06-09	0.3298805199400664			soil	361734	Poland: Bialowieza National Park	cell culture	linear	527623571	238674192	Poland,Bialowieza National Park			Bacilli (91061)	Bacillaceae (186817)	Bacillus (1386)	Bacillus mycoides	Bacillales (1385)	Bacillota (1239)	Bacillus_mycoides (1405)		Bacteria (2)	-22331972	-4647538	GCF_018736725.1	35.7	MOBL	mobilizable	1	2
NZ_CP035969.1	397298	34.0	0	0	0	402	6	58	0	2	0	0	0	0	traM, tcpC, trbC, ltrA, merR, fabF, marR, lysM, ftsK, tnpA, yajC, tnpB, esaA, essA, yukD, essB, essC, sseB, tnpB, colA, gerPF, recU, recU, arpU, merR, czcR, yoaR, exsF, gerPF, recU, arpU, tnp, tnp, pseC, pseG, pseH, pseI, tnpB, tnp, tnp, betT, map, abrB, hfq, tnp, tetR, dltA, solG, abrB, bclA, araC, arpU, arpU, xerD, ydiK, tnp, ymaF, tnpB, xerS, padR, clfA, tnp, abrB, comEC, arpU, recU, padR, nos…		phoR, phoB, dut	2021-06-09	0.3400319155898091			soil	397298	Poland: Bialowieza National Park	cell culture	linear	527623571	238674192	Poland,Bialowieza National Park			Bacilli (91061)	Bacillaceae (186817)	Bacillus (1386)	Bacillus mycoides	Bacillales (1385)	Bacillota (1239)	Bacillus_mycoides (1405)		Bacteria (2)	-21910443	-46330333	GCF_018736745.1	35.5	MOBL	mobilizable	0	3
NZ_CP035975.1	231973	33.5	0	0	0	226	3	34	0	0	0	0	0	0	tnpA, orfB, ftsK, lacI, padR, tnp, tnp, prsA, tnp, ybjQ, czcR, czcR, tdcB, ald, dinB, tnp, accA, czcR, tnpB, gatD, murT, ybjQ, katE, tnpB, tnp, tnp, tnpB, repC, tnp		phoP	2021-06-09	0.3347975842016096			soil	231973	Poland: Bialowieza National Park	cell culture	linear	527623571	238674192	Poland,Bialowieza National Park			Bacilli (91061)	Bacillaceae (186817)	Bacillus (1386)	Bacillus mycoides	Bacillales (1385)	Bacillota (1239)	Bacillus_mycoides (1405)		Bacteria (2)	-2273323	-4664921	GCF_018736765.1	35.7	MOBL	mobilizable	0	1
NZ_CP035976.1	357042	33.0	0	0	0	368	4	59	0	0	0	0	0	0	traM, tcpC, trbC, ltrA, tnpB, ltrA, merR, marR, padR, yhaQ, dltD, bclA, colA, ftsK, tnp, tnpA, cxxC, gloB, yesE, mcrC, brxC, pglX, pglZ, brxL, purR, narK, iolG, iolC, iolA3, iolD, iolE, fba, iolB, tatA, orfB, yobV, yajL, sulP, dltC, toxI, xpaF1, xerS, nosD, sdaC, sdaAA, sdaAB, copY, dinB, yvrH, recU, phoP, yrzO, pucR, orfB, tnp, araJ, acrR, cls, bsrC, cdnL, pdaB, yjjG, marR, yndE, tnp, lepB, tnp,…	phoP	phoB, phoP	2021-06-09	0.3295886758420578			soil	357042	Poland: Bialowieza National Park	cell culture	linear	527623571	238674192	Poland,Bialowieza National Park			Bacilli (91061)	Bacillaceae (186817)	Bacillus (1386)	Bacillus mycoides	Bacillales (1385)	Bacillota (1239)	Bacillus_mycoides (1405)		Bacteria (2)	-21914768	-4628744599999990	GCF_018736765.1	35.7	MOBL	mobilizable	1	2
NZ_CP035986.1	511214	33.5	0	0	0	452	11	47	0	2	0	0	0	0	merR, umuC, ftsK, yxeA, rsfA, tnpB, cbaT, yesE, acrR, asnB, satA, bglC, pseC, pseG, pseH, pseI, tnpB, ltrA, vanR, lolD, glsA, brnQ, mgtE, mgtA, tnpC, fadH2, hfq, tnp, ampC, dltA, solG, gerPA, arpU, xerD, dltB, tetR, tnp, tnp, xerS, tnpB, yxeA, phoP, ompR, tnp, xpaF1, sbnB, ridA, lysA, uvrA, uvrB, ypdA, sbnA, tnp, tnp, tnpB, czcR, sepF, tnp, tnp, ltrA, bsrC, cdnL, ltrA, cas3, cas5b, cas7i, cas8a1,…	phoP	phoB, phoB, phoB	2021-06-09	0.3352940255939782			soil	511214	Poland: Bialowieza National Park	cell culture	linear	527623571	238674192	Poland,Bialowieza National Park			Bacilli (91061)	Bacillaceae (186817)	Bacillus (1386)	Bacillus mycoides	Bacillales (1385)	Bacillota (1239)	Bacillus_mycoides (1405)		Bacteria (2)	-21686249	-46102223	GCF_018739365.1	35.6	MOBL	mobilizable	1	3
NZ_CP035996.1	538903	33.2	0	0	0	495	10	55	0	1	0	0	0	0	solG, tnp, frmA, fghA, gshB, czcR, acrR, araJ, pucR, ald, yrzO, phoP, ybjQ, tnp, qdoI, cDA1, ftsN, dAP2, bsh, ftsW, mgtE, nAGPA, padR, tnp, map, hfq, tctB, xerS, sepF, tnpB, mmuP, mmuM, yesE, gloB, cxxC, ftsK, orfB, padR, oxdD, sdaAB, eamA, hemA, tar, bsrC, cdnL, ltrA, ezrA, pbsX, tetR, alr, eamA, tnp, tnpB, satA, asnB, acrR, xpaF1, immA, yesE, gloB, cxxC, arpU, gerPA, mutT, rsfA, pseC, dinB, thi…	phoP	phoP	2021-06-09	0.3316422435948584			soil	538903	Poland: Bialowieza National Park	cell culture	linear	527623571	238674192	Poland,Bialowieza National Park			Bacilli (91061)	Bacillaceae (186817)	Bacillus (1386)	Bacillus mycoides	Bacillales (1385)	Bacillota (1239)	Bacillus_mycoides (1405)		Bacteria (2)	-2.15805e+16	-4601596400000000	GCF_018739445.1	35.5	MOBL	mobilizable	1	1
NZ_CP036001.1	225867	33.4	0	0	0	233	1	23	0	0	0	0	0	0	cdiI, dnaN, ftsK, repX, ftsZ, cpaB, gspF, gspF, yicC, padR, prgI, herA, tnp, tnp, umuC, dinB, aimR, rimK, parB, xerS, phoP, yrzO, ald, pucR, cas2, cas1c, cas4, cas7c, cas8c, cas5c, cas3	phoP	phoP	2021-06-09	0.3335945490045026			soil	225867	Poland: Bialowieza National Park	cell culture	linear	527623571	238674192	Poland,Bialowieza National Park			Bacilli (91061)	Bacillaceae (186817)	Bacillus (1386)	Bacillus mycoides	Bacillales (1385)	Bacillota (1239)	Bacillus_mycoides (1405)		Bacteria (2)	-20655038	-47726297	GCF_018739505.1	35.5	MOBL	mobilizable	1	1
NZ_CP036002.1	374906	34.1	0	0	0	346	10	38	0	2	0	0	0	0	merR, pbsX, ftsN, umuC, ykgJ, nagA, agaV, agaW, agaF, lacC, lacD, fbpA, copG, gerPA, arpU, tnpB, cxxC, gloB, yesE, acrR, asnB, tnpA, tnpB, tnpB, bglC, tnpB, iadA, ftsZ, gerPF, recU, arpU, tnp, pseC, pseG, pseH, pseI, abrB, hfq, dltA, solG, gerPA, arpU, xerD, dltB, tetR, tnp, tnp, czcR, ompR, phoP, tnpB, tnp, vanR, lolD, dAP2, ftsW, mgtE, nAGPA, czcR, hemA, xerS, xpaF1, yjcZ, bsrC, cdnL, arpU, rec…	phoP	ptsH, phoB, phoB, phoB, phoB, phoR	2021-06-09	0.3406987351496108			soil	374906	Poland: Bialowieza National Park	cell culture	linear	527623571	238674192	Poland,Bialowieza National Park			Bacilli (91061)	Bacillaceae (186817)	Bacillus (1386)	Bacillus mycoides	Bacillales (1385)	Bacillota (1239)	Bacillus_mycoides (1405)		Bacteria (2)	-21570451	-4.61337e+16	GCF_018739505.1	35.5	MOBL	mobilizable	1	6
NZ_CP036007.1	371005	33.3	0	0	0	338	5	47	0	2	0	0	0	0	merR, umuC, ftsK, yxeA, pseC, rsfA, tnp, mutT, fbpA, copG, gerPA, arpU, tnpB, cxxC, gloB, yesE, acrR, asnB, tnpA, tnpB, tnpB, bglC, pseC, pseG, pseH, pseI, tnpB, abrB, hfq, ampC, dltA, solG, grsT, rocF, umuC, arsR, abrB, hfq, phoP, yxeA, tnpB, dAP2, bsh, ftsW, mgtE, nAGPA, xerS, sepF, bsrC, cdnL, ltrA, cas3, cas5b, cas7i, cas8a1, cas6, sdaAB, eamA, hemA, hfq, traF, copG, copG, merR, virB4, traM, …	phoP	phoR, phoR, phoB, phoB	2021-06-09	0.3332165334698993			soil	371005	Poland: Bialowieza National Park	cell culture	linear	527623571	238674192	Poland,Bialowieza National Park			Bacilli (91061)	Bacillaceae (186817)	Bacillus (1386)	Bacillus mycoides	Bacillales (1385)	Bacillota (1239)	Bacillus_mycoides (1405)		Bacteria (2)	-21804118	-4615629	GCF_018739525.1	35.5	MOBL	mobilizable	1	4
NZ_CP036012.1	400360	33.6	0	0	0	378	3	46	0	0	0	0	0	0	tnp, yxeA, ftsK, umuC, merR, map, aimR, traM, traM, virB4, ltrA, merR, copG, copG, abrB, hfq, hfq, thsA, phoP, yxeA, lysE, bsh, ftsW, mgtE, nAGPA, xerS, pucR, tnp, lolD, vanR, tar, bsrC, cdnL, ltrA, arpA, ahpC, ahpF, ftsN, cDA1, qdoI, abrB, tnp, arpU, araC, abrB, solG, dltA, ampC, tnp, hfq, fadH2, tnpC, mgtA, ftsW, mgtE, umuC, marR, pseI, pseH, pseG, pseC, tnp, arpU, araC, tnp, map, hfq, asnB, ac…	phoP	phoB, phoB	2021-06-09	0.3356853831551603			soil	400360	Poland: Bialowieza National Park	cell culture	linear	527623571	238674192	Poland,Bialowieza National Park			Bacilli (91061)	Bacillaceae (186817)	Bacillus (1386)	Bacillus mycoides	Bacillales (1385)	Bacillota (1239)	Bacillus_mycoides (1405)		Bacteria (2)	-21731844	-4611194599999990	GCF_018739545.1	35.6	MOBL	mobilizable	1	2
NZ_CP036016.1	246340	32.4	0	0	0	223	7	31	0	1	0	0	0	0	ftsK, ftsN, tnp, cdiI, dltC, dltB, dinB, cdnL, bsrC, marR, tnp, tnp, gntR, tnpB, spoIVCA, czcR, xerS, vgb, folE, queE, queD, queC, lmbE, arsC, arsB, gloA, arsR, gerQC, gerQB, gerQA, tnpB, ybjQ, katE, citB, rocF, traM, aimR		phoB, phoP	2021-06-09	0.3243241048956726			soil	246340	Poland: Bialowieza National Park	cell culture	linear	527623571	238674192	Poland,Bialowieza National Park			Bacilli (91061)	Bacillaceae (186817)	Bacillus (1386)	Bacillus toyonensis	Bacillales (1385)	Bacillota (1239)	Bacillus_toyonensis (155322)		Bacteria (2)	-2306487	-46764364	GCF_018739605.1	35.3	MOBL	mobilizable	0	2
NZ_CP036021.1	318875	33.8	0	0	0	281	4	21	0	2	0	0	0	0	tnp, ftsK, umuC, merR, tnpB, fadR, aimR, traM, traM, virB4, merR, copG, map, hfq, dsrE, gntR, phzF, merR, rhtB, dinB, cls, mreD, tnp, dltA, solG, tnpB, tnp, acrR, asnB, satA, arsR, tnp, acrR, araJ, tnp, tnp, yndE, sdaAB, sdaAA, sdaC, eamA, arsR, wbbJ, qdoI, cDA1, ftsN, xerS, tar, bsrC, cdnL, tnp, arpU, recU, cpaF, resD, yoaR, mmuP, mmuM, gerPF, dut2, yesE, gloB, cxxC, ampC, tnp, tnp, yxeA, tnpB, …		dut, phoB	2021-06-09	0.3380540964327714			soil	318875	Poland: Bialowieza National Park	cell culture	linear	527623571	238674192	Poland,Bialowieza National Park			Bacilli (91061)	Bacillaceae (186817)	Bacillus (1386)	Bacillus mycoides	Bacillales (1385)	Bacillota (1239)	Bacillus_mycoides (1405)		Bacteria (2)	-2.17663e+16	-46034083	GCF_018739625.1	35.6	MOBL	mobilizable	0	2
NZ_CP036025.1	479471	33.3	1	0	0	429	6	51	0	0	0	0	0	0	tnp, ftsK, umuC, merR, map, aimR, traM, traM, virB4, merR, copG, copG, dinB, cls, mreD, yxeA, pseC, pseG, pseH, pseI, abrB, hfq, ampC, dltA, solG, arsR, sleL, tnp, frmA, fghA, gshB, tnp, czcR, acrR, araJ, tnp, yndE, sdaAB, sdaAA, sdaC, eamA, arsR, catB, qdoI, cDA1, ftsN, xerS, mgtA, mgtE, tar, eamA, bsrC, cdnL, fliT, rhtB, arpU, recU, gerPA, cpaF, resD, yoaR, tnp, trnV, satA, asnB, acrR, xpaF1, i…		dut, phoB	2021-06-09	0.3327375378281481			soil	479471	Poland: Bialowieza National Park	cell culture	linear	527623571	238674192	Poland,Bialowieza National Park			Bacilli (91061)	Bacillaceae (186817)	Bacillus (1386)	Bacillus mycoides	Bacillales (1385)	Bacillota (1239)	Bacillus_mycoides (1405)		Bacteria (2)	-2181992	-46276417	GCA_018739645.1	35.6	MOBL	mobilizable	0	2
NZ_CP036028.1	232193	33.5	0	0	0	232	6	35	0	1	0	0	0	0	ftsK, lacI, padR, tnp, prsA, tnp, ybjQ, czcR, czcR, tnp, tdcB, ald, dinB, tnp, accA, czcR, tnpB, gatD, murT, tnpB, katE, tnpA, orfB, tnp, tnp, tnpB, repC, tnp		phoP	2021-06-09	0.3348119883028342			soil	232193	Poland: Bialowieza National Park	cell culture	linear	527623571	238674192	Poland,Bialowieza National Park			Bacilli (91061)	Bacillaceae (186817)	Bacillus (1386)	Bacillus mycoides	Bacillales (1385)	Bacillota (1239)	Bacillus_mycoides (1405)		Bacteria (2)	-2288646	-4688454599999990	GCF_018739665.1	35.6	MOBL	mobilizable	0	1
NZ_CP036030.1	419002	32.9	2	0	0	421	10	75	0	0	0	0	0	0	traM, tcpC, trbC, ltrA, merR, marR, padR, yhaQ, dltD, insQ, colA, ftsK, tnp, tnpA, yxeA, arpU, mutT, trnV, xerD, trnV, yajC, xoxI, xoxI, tnp, tnpB, padR, tnp, tnp, rimL, ccdC, tnp, fbpA, sepF, xpaF1, xerS, hfq, sdaC, sdaAA, sdaAB, marR, copY, dinB, xerC, xerC, tnp, recU, phoP, yrzO, ald, pucR, araJ, acrR, accA, tnp, tnp, bsrC, cdnL, pdaB, yjjG, tnp, yndE, tnp, lepB, tnp, traM	phoP	phoB, phoP	2021-06-09	0.3287717003737452			soil	419002	Poland: Bialowieza National Park	cell culture	linear	527623571	238674192	Poland,Bialowieza National Park			Bacilli (91061)	Bacillaceae (186817)	Bacillus (1386)	Bacillus mycoides	Bacillales (1385)	Bacillota (1239)	Bacillus_mycoides (1405)		Bacteria (2)	-2244926	-4.639e+16	GCF_018739665.1	35.6	MOBL	mobilizable	1	2
NZ_CP036038.1	369824	33.4	0	0	0	353	5	52	0	0	0	0	0	0	tnp, merR, ltrA, ftsK, ushA, rsfA, tnpB, cbaT, hlyD, cxxC, gloB, yesE, tnpB, immA, xpaF1, dut2, arpU, arpU, rpoE, mazG, tnp, mcrA, dcm, purR, narK, iolG, iolC, iolA3, iolD, iolE, fba, iolB, yajC, tnpB, hfq, yopX, prsA, tnp, pagR, araC, tnp, araC, tnpB, araC, tnp, ybjQ, tnp, xerS, arsR, sdaC, sdaAA, sdaAB, tnp, pucB, xdhC, nosD, lasB, dinB, czcR, tnp, accA, lanM, gatD, tnp, murT, katE, tnpB, ybjQ,…	phoP	phoP, phoP	2021-06-09	0.3343428225317989			soil	369824	Poland: Bialowieza National Park	cell culture	linear	527623571	238674192	Poland,Bialowieza National Park			Bacilli (91061)	Bacillaceae (186817)	Bacillus (1386)	Bacillus mycoides	Bacillales (1385)	Bacillota (1239)	Bacillus_mycoides (1405)		Bacteria (2)	-22650812	-4670842	GCF_018739685.1	35.6	MOBL	mobilizable	1	2
NZ_CP036041.1	481041	33.6	0	0	0	440	13	57	0	2	0	0	0	0	merR, tnp, yfkO, colA, umuC, ftsK, yxeA, rsfA, tnpB, cbaT, yesE, acrR, asnB, satA, tnpB, tnpB, bglC, pseC, pseG, pseH, pseI, tnp, yoaR, exsF, gerPF, recU, arpU, tnp, abrB, hfq, dltA, solG, gerPA, arpU, xerD, dltB, tetR, ltrA, tnp, xerS, ltrA, tnpB, yxeA, phoP, tnp, ltrA, tnp, fabH, plsY, ompR, czcR, tnp, xhlA, sbnB, ridA, lysA, uvrA, uvrB, ypdA, sbnA, tnp, tnp, tnpB, czcR, sepF, tnp, yrvL, ltrA, …	phoP	spoT, dut, phoB, phoB	2021-06-09	0.3359401797351993			soil	481041	Poland: Bialowieza National Park	cell culture	linear	527623571	238674192	Poland,Bialowieza National Park			Bacilli (91061)	Bacillaceae (186817)	Bacillus (1386)	Bacillus mycoides	Bacillales (1385)	Bacillota (1239)	Bacillus_mycoides (1405)		Bacteria (2)	-2192574	-46118264	GCF_018740945.1	35.5	MOBL	mobilizable	1	4
NZ_CP036044.1	211646	32.4	0	0	0	175	1	12	0	0	0	0	0	0	araC, adhE, nrdG, nrdD, tnpB, ald, tdcB, potE, scfA, scfB, gldA, dhaK, dhaL, manY, manZ, grpB, pfkB, ptsG2, lacI, msmX, pgmB, pgmB, tnpB, fabZ, gcvT, fabF, rfbA, rfbC, rfbB, rfbD, yhcF, thnB, thnI, arsR, manA, bglG, argR, tdcB, ald, ftsK, sulP, dltC, hfq, hxlR, tnp, mutT, hfq, copG, merR		nrdD, ugpC	2021-06-09	0.3236300237188513			soil	211646	Poland: Bialowieza National Park	cell culture	linear	527623571	238674192	Poland,Bialowieza National Park			Bacilli (91061)	Bacillaceae (186817)	Bacillus (1386)	Bacillus mycoides	Bacillales (1385)	Bacillota (1239)	Bacillus_mycoides (1405)		Bacteria (2)	-25403285	-4585643	GCF_018741005.1	35.5	MOBL	mobilizable	0	2
NZ_CP036045.1	437823	34.0	0	0	0	403	4	49	0	0	0	0	0	0	merR, ftsN, ftsK, rsfA, yxeA, mutT, hhoA, cxxC, gloB, immA, xpaF1, dut2, fosB, gerPF, arpU, alpA, hicB, grpB, purR, narK, iolG, iolC, iolA3, iolD, iolE, fba, iolB, nagA, agaV, agaW, agaF, lacC, lacD, glxA, betT, sigV, tnp, marR, umuC, algI, ycgB, phoP, ykkD, bclA, sdaAB, sdaAA, sdaC, ushA, bsh, ftsW, mgtE, nAGPA, xerS, comE, grsT, solG, dltA, arpU, recU, mmuM, mmuP, mgtA, tnpB, mgtE, tnp, aceA, y…	phoP	phoR, phoB, phoR, phoB, RegX3, phoB, phoB, phoR	2021-06-09	0.3404001160286234			soil	437823	Poland: Bialowieza National Park	cell culture	linear	527623571	238674192	Poland,Bialowieza National Park			Bacilli (91061)	Bacillaceae (186817)	Bacillus (1386)	Bacillus mycoides	Bacillales (1385)	Bacillota (1239)	Bacillus_mycoides (1405)		Bacteria (2)	-21908226	-4613533	GCF_018741005.1	35.5	MOBL	mobilizable	1	8
NZ_CP036050.1	396394	33.6	0	0	0	335	7	31	0	2	0	0	0	0	merR, tnp, yfkO, colA, umuC, ftsK, rimL, rsfA, tnpB, cbaT, cxxC, gloB, yesE, acrR, asnB, tnpA, tnpB, tnpB, bglC, pseC, pseG, pseH, pseI, tnpB, vanR, lolD, tnp, glsA, brnQ, mgtE, mgtA, tnpC, fadH2, hfq, tnp, ampC, dltA, solG, bclA, ywqG, tnp, tnp, czcR, ompR, phoP, yxeA, tnpB, xerS, tnp, xpaF1, sbnB, ridA, lysA, uvrA, uvrB, ypdA, sbnA, tnp, tnp, tnpB, czcR, sepF, tnp, bsrC, cdnL, tnp, tetR, alr, m…	phoP	phoB, phoB, phoB	2021-06-09	0.3360040767519185			soil	396394	Poland: Bialowieza National Park	cell culture	linear	527623571	238674192	Poland,Bialowieza National Park			Bacilli (91061)	Bacillaceae (186817)	Bacillus (1386)	Bacillus mycoides	Bacillales (1385)	Bacillota (1239)	Bacillus_mycoides (1405)		Bacteria (2)	-21567092	-4.59868e+16	GCF_018741085.1	35.6	MOBL	mobilizable	1	3
NZ_CP036054.1	270706	32.8	0	0	0	241	3	27	0	1	0	0	0	0	ftsK, tnpB, ftsN, yjcZ, tsaA, ltrA, yunB, dltC, dltB, dinB, malK, spoIVCA, spoIVCA, czcR, xerS, cdiI, tnpB, gerQC, gerQB, gerQA, tnpB, ybjQ, katE, citB, rocF, bsrC, abrB, tnpB, tasA, potE, brnQ, proC, sfcA, gerC, gerAB, cheY, baeS, glsA, alsT, arsB, padR, hfq, merR, virB4, traM, traM, aimR		phoB, ugpC, phoP	2021-06-09	0.3280533124496686			soil	270706	Poland: farmland in Jasienowka	cell culture	linear	525320559	229680514	Poland,farmland in Jasienowka			Bacilli (91061)	Bacillaceae (186817)	Bacillus (1386)	Bacillus toyonensis	Bacillales (1385)	Bacillota (1239)	Bacillus_toyonensis (155322)		Bacteria (2)	-23296368	-4678925	GCF_018741125.1	35.5	MOBL	mobilizable	0	3
NZ_CP036055.1	354632	33.0	0	0	0	311	3	36	0	0	0	0	0	0	traM, gntR, gntK, gntP, gndA, tcpC, trbC, merR, padR, tnp, merR, marR, tnpB, arsR, ftsK, rimL, rsfA, tnpB, trmB, ygaZ, csaA, eamA, mphM, alr, bsrC, cxxC, gloB, yesE, purR, narK, iolG, iolC, iolA3, iolD, iolE, fba, iolB, yajC, tnpB, tnpB, bglC, tar, vanR, vanS, lolD, lolD, pseC, pseG, pseH, pseI, rodA, lmbE, queC, queD, queE, folE, hisG, modA, lysE, tnp, tnp, grsT, sfp, solG, dltA, ampC, ampC, tnp…		gntK, gnd, phoR, phoB, RegX3	2021-06-09	0.3301958086128719			soil	354632	Poland: farmland in Jasienowka	cell culture	linear	525320559	229680514	Poland,farmland in Jasienowka			Bacilli (91061)	Bacillaceae (186817)	Bacillus (1386)	Bacillus toyonensis	Bacillales (1385)	Bacillota (1239)	Bacillus_toyonensis (155322)		Bacteria (2)	-23024125	-46640935	GCF_018741125.1	35.5	MOBL	mobilizable	0	5
NZ_CP036068.1	233674	33.3	1	0	0	248	11	60	0	0	0	0	0	0	ftsK, fabZ, arsR, ftsN, deoR, marR, xoxI, aRO8, eamA, hfq, brnQ, glsA, sulP, yjdJ, istA, istB, lepB, abrB, hfq, Bacillus-plasmid, wapA, xpaF1, repC, trnM		phoR, phoB	2021-06-09	0.3334602908325274			soil	233674	Poland: farmland in Jasienowka	cell culture	linear	525320559	229680514	Poland,farmland in Jasienowka			Bacilli (91061)	Bacillaceae (186817)	Bacillus (1386)	Bacillus mycoides	Bacillales (1385)	Bacillota (1239)	Bacillus_mycoides (1405)		Bacteria (2)	-24041426	-50870132	GCF_018741165.1	35.5	MOBL	mobilizable	0	2
NZ_CP036072.1	536465	32.3	0	0	0	496	12	74	0	1	0	0	0	0	traM, dinB, gntR, gntK, gntP, gndA, tcpC, ltrA, merR, marR, lysM, tar, ftsK, rsfA, yxeA, lasB, pqqD, mcjB, arpU, acrR, asnB, satA, fbpA, arpU, xkdF, yqbF, ltrA, ubiG, echA8, mafB, tnp, yajC, clfA, tnpA, aprE, rfbG, wcaG, rfbF, tnp, tnp, padR, galM, galK, galT, xerS, hemA, czcR, nAGPA, mgtE, ftsW, galU, tnpB, cotS, vanZ, vanS-Pt, vanR-A, tnpB, bsrC, gntR, arsR, rimI, acrR, ampS, cdiI, arpU, recU, …		gntK, gnd, spoT, dut, dut, phoB	2021-06-09	0.3231506249242727			soil	536465	Poland: farmland in Jasienowka	cell culture	linear	525320559	229680514	Poland,farmland in Jasienowka			Bacilli (91061)	Bacillaceae (186817)	Bacillus (1386)	Bacillus wiedmannii	Bacillales (1385)	Bacillota (1239)	Bacillus_wiedmannii (1890302)		Bacteria (2)	-2.36469e+16	-459491	GCF_018741285.1	35.5	MOBL	mobilizable	0	6
NZ_CP036076.1	198488	33.7	0	0	0	216	11	55	0	0	0	0	0	0	ftsK, fabZ, xoxI, tnp, mutT, aRO8, eamA, hfq, brnQ, lepB, abrB, hfq, lepB, tnp, mutT, tnp, ltrA, tnp, rsiW, sigX, ltrA, xpaF1, lysO, repC		phoR, phoB	2021-06-09	0.3365341985409697			soil	198488	Poland: farmland in Jasienowka	cell culture	linear	525320559	229680514	Poland,farmland in Jasienowka			Bacilli (91061)	Bacillaceae (186817)	Bacillus (1386)	Bacillus mycoides	Bacillales (1385)	Bacillota (1239)	Bacillus_mycoides (1405)		Bacteria (2)	-23898532	-5037656	GCF_018741465.1	35.6	MOBL	mobilizable	0	2
NZ_CP036079.1	506603	33.5	0	0	0	477	9	61	0	0	0	0	0	0	dinB, ftsK, traM, cpaB, gspF, gspF, yicC, prgI, herA, tnp, ltrA, arpU, tnp, pseC, pseG, pseH, pseI, vanR, lolD, tar, mgtE, ftsW, ftsW, mgtA, tnpC, fadH2, hfq, ampC, dltA, solG, grsT, arsR, abrB, tnpB, hfq, alr, tetR, ykkD, bsh, ftsW, mgtE, nAGPA, ftsN, phoP, mutT, tnp, xerS, sepF, hhoA, mmuM, mmuP, czcR, tnpB, tnp, ftsK, splB, splA, ymfJ, mmpL, ahpD, yfbU, arpU, dut, yqaJ, fbpA, tnp, bsrC, cdnL, …	phoP	phoB, phoB, phoB, phoR, dut, phoP, spoT	2021-06-09	0.3345144027966672			soil	506603	Poland: farmland in Jasienowka	cell culture	linear	525320559	229680514	Poland,farmland in Jasienowka			Bacilli (91061)	Bacillaceae (186817)	Bacillus (1386)	Bacillus mycoides	Bacillales (1385)	Bacillota (1239)	Bacillus_mycoides (1405)		Bacteria (2)	-21356778	-4598636	GCF_018741465.1	35.6	MOBL	mobilizable	1	7
NZ_CP036093.1	439317	33.0	0	0	0	336	3	26	0	1	0	0	0	0	traM, gntR, gntK, gntP, gndA, tcpC, trbC, merR, merR, marR, fbpB, vanR, vanS, lolD, lolD, lysM, ftsK, rimL, rsfA, yxeA, ssuD, rhtB, mphM, tnp, cxxC, gloB, yesE, iolA3, iolD, iolE, fba, iolB, rodA, yajC, solG, dltA, solG, ftsN, bglC, aprE, gerAC, gerAB, gerAA, pseC, pseG, pseH, pseI, fadH2, pspE, tnpB, pssA, rimL, xerS, czcR, asnB, arsR, mauE, mauE, tnp, dAP2, tnp, comP, graR, lolD, vanR, grsT, sf…		gntK, gnd, RegX3, phoR, phoB, phoP, phoB, dut	2021-06-09	0.3297118026390966			soil	439317	Poland: farmland in Jasienowka	cell culture	linear	525320559	229680514	Poland,farmland in Jasienowka			Bacilli (91061)	Bacillaceae (186817)	Bacillus (1386)	Bacillus toyonensis	Bacillales (1385)	Bacillota (1239)	Bacillus_toyonensis (155322)		Bacteria (2)	-2323858	-46415205	GCF_018741525.1	35.4	MOBL	mobilizable	0	8
NZ_CP036096.1	274778	33.5	0	0	0	219	6	28	0	1	0	0	0	0	ftsK, ftsN, tnp, tnp, hfq, colA, tnp, sdpI, hfq, tnpB, yfcC, gerA, yndE, bsrC, rocF, citB, katE, ybjQ, gerQA, gerQB, gerQC, lacI, ugpC, araC, galK, galT, galE, brnQ, xerS, mauE, mauE, tnpB, malK, dinB, dltB, dltC, hfq, mphM	ugpC	phoP, ugpC, ugpC, phoB	2021-06-09	0.3350923290802029			soil	274778	Poland: farmland in Jasienowka	cell culture	linear	525320559	229680514	Poland,farmland in Jasienowka			Bacilli (91061)	Bacillaceae (186817)	Bacillus (1386)	Bacillus toyonensis	Bacillales (1385)	Bacillota (1239)	Bacillus_toyonensis (155322)		Bacteria (2)	-23320115	-4.6611e+16	GCF_018741545.1	35.5	MOBL	mobilizable	1	4
NZ_CP036097.1	356088	32.8	0	0	0	353	5	46	0	0	0	0	0	0	traM, gntR, gntK, gntP, gndA, tcpC, trbC, merR, padR, tnp, merR, marR, tnpB, arsR, ftsK, rimL, rsfA, tnpB, trmB, ygaZ, csaA, eamA, mphM, alr, bsrC, cxxC, gloB, yesE, purR, narK, iolG, iolC, iolA3, iolD, iolE, fba, iolB, yajC, tnpB, yunG, tnpB, tnp, tnp, vanR, vanS, arpU, padR, gntR, tnp, tnp, lysE, modA, hisG, folE, queE, queD, queC, lmbE, rodA, pseI, pseH, pseG, pseC, lolD, lolD, vanS, vanR, tar…		gntK, gnd, phoR, phoB, phoB, RegX3	2021-06-09	0.3275959875087057			soil	356088	Poland: farmland in Jasienowka	cell culture	linear	525320559	229680514	Poland,farmland in Jasienowka			Bacilli (91061)	Bacillaceae (186817)	Bacillus (1386)	Bacillus toyonensis	Bacillales (1385)	Bacillota (1239)	Bacillus_toyonensis (155322)		Bacteria (2)	-23135889	-4710108999999990	GCF_018741545.1	35.5	MOBL	mobilizable	0	6
NZ_CP036100.1	508817	33.1	0	0	0	470	6	51	0	0	0	0	0	0	dinB, traG, traM, traM, cpaB, gspF, gspF, yicC, galU, prgI, herA, ltrA, dltB, lysE, malK, lolD, tnp, padR, araC, arpU, tnp, dltA, solG, tnp, arsR, tnp, tnp, sdpI, frmA, fghA, gshB, czcR, rfbG, rfbF, acrR, araJ, pucR, ald, yrzO, phoP, ybjQ, qdoI, cDA1, ftsN, dAP2, bsh, ftsW, mgtE, nAGPA, tnp, map, hfq, xerS, sepF, yxeA, ftsK, alr, recU, ltrA, arsR, splA, betT, mmuM, mmuP, tnpB, tar, bsrC, cdnL, tn…	phoP	phoB, ugpC, phoP, spoT	2021-06-09	0.3305215824156818			soil	508817	Poland: farmland in Jasienowka	cell culture	linear	525320559	229680514	Poland,farmland in Jasienowka			Bacilli (91061)	Bacillaceae (186817)	Bacillus (1386)	Bacillus mycoides	Bacillales (1385)	Bacillota (1239)	Bacillus_mycoides (1405)		Bacteria (2)	-21602876	-46128	GCF_018741565.1	35.5	MOBL	mobilizable	1	4
NZ_CP036103.1	405965	34.2	0	0	0	396	5	56	0	1	0	0	0	0	merR, tnpB, ftsK, ltrA, yxeA, ampC, ftsN, cxxC, tnpA, yesE, dut2, yopX, gerPF, padR, recU, arpU, ydiK, tnp, mgtE, mgtA, pseC, pseG, pseH, pseI, yajC, padR, ytrA, ytrB, dltB, resD, lysE, ymaF, tnpB, xerS, tnp, sdaC, sdaAA, sdaAB, hblB, tnpB, tnpB, rocF, tnpB, solG, dltA, tnp, bsrC, cdnL, yafY, fliT, grpB, fliK, marR, padR, arpU, recU, gerPA, exsF, yoaR, bclA, czcR, recU, nosD, abrB, spaA, tnpB, dn…		phoB, phoB, dut	2021-06-09	0.3418742995085783			soil	405965	Poland: farmland in Jasienowka	cell culture	linear	525320559	229680514	Poland,farmland in Jasienowka			Bacilli (91061)	Bacillaceae (186817)	Bacillus (1386)	Bacillus mycoides	Bacillales (1385)	Bacillota (1239)	Bacillus_mycoides (1405)		Bacteria (2)	-2.18485e+16	-4613648	GCF_018741605.1	35.6	MOBL	mobilizable	0	3
NZ_CP036104.1	247123	32.8	0	0	0	244	5	25	0	0	0	0	0	0	ftsK, yhfH, pqqD, tnpB, lepB, mutT, eamA, colA, spoII, pucR, ald, yrzO, phoP, tnp, spbB, dinB, fabZ, ybjQ, ald, tdcB, potE, tnpB, folE, queE, queD, queC, lmbE, yndE, salY, lolD, acrA, padR, tnpB, adhE, araC, tnp, ybjQ, cspD, copG, merR, virB4, traM, traM, aimR, repC, yvaK	phoP	phoP	2021-06-09	0.3279824217090274			soil	247123	Poland: farmland in Jasienowka	cell culture	linear	525320559	229680514	Poland,farmland in Jasienowka			Bacilli (91061)	Bacillaceae (186817)	Bacillus (1386)	Bacillus mycoides	Bacillales (1385)	Bacillota (1239)	Bacillus_mycoides (1405)		Bacteria (2)	-2265198	-4658651	GCF_018741605.1	35.6	MOBL	mobilizable	1	1
NZ_CP036113.1	277779	33.1	0	0	0	242	4	29	0	0	0	0	0	0	ftsK, hfq, sdpI, hfq, tnp, yunB, copG, tnp, glxA, umuC, gerA, yndE, bsrC, rocF, citB, katE, arsR, murT, gatD, gerQA, gerQB, gerQC, xerS, malK, dltB, dltC, hfq, alr, tnp, copG, merR, virB4, traM, traM, aimR, bcsA		phoP, ugpC, phoB	2021-06-09	0.3307485447064033			soil	277779	Poland: farmland in Jasienowka	cell culture	linear	525320559	229680514	Poland,farmland in Jasienowka			Bacilli (91061)	Bacillaceae (186817)	Bacillus (1386)	Bacillus toyonensis	Bacillales (1385)	Bacillota (1239)	Bacillus_toyonensis (155322)		Bacteria (2)	-22909176	-46725883	GCF_018741625.1	35.4	MOBL	mobilizable	0	3
NZ_CP036127.1	192434	33.7	1	0	0	205	8	44	0	1	0	0	0	0	tnp, istB, repC, trnI, ftsK, fabZ, hhoA, marR, xoxI, aRO8, eamA, hfq, brnQ, glsA, lepB, abrB, hfq, acrA, lolD, salY, tnp, fabZ, tnp, xpaF1		phoR, phoR, phoB, phoR, phoB	2021-06-09	0.3365725391562821			soil	192434	Poland: farmland in Jasienowka	cell culture	linear	525320559	229680514	Poland,farmland in Jasienowka			Bacilli (91061)	Bacillaceae (186817)	Bacillus (1386)	Bacillus mycoides	Bacillales (1385)	Bacillota (1239)	Bacillus_mycoides (1405)		Bacteria (2)	-23997278	-5052551	GCF_018742225.1	35.6	MOBL	mobilizable	0	5
NZ_CP036135.1	162314	33.2	0	0	0	162	2	32	0	0	0	0	0	0	ftsK, umuC, wapA, tnp, lysE, umuC, orfB, ybjQ, tnp, gatD, murT, ybjQ, katG, fbpA, ybjQ, lysM, tnp, yndE, bsrC, mutT, tnpB, repC		phoP	2021-06-09	0.3321340118535678			soil	162314	Poland: farmland in Jasienowka	cell culture	linear	525320559	229680514	Poland,farmland in Jasienowka			Bacilli (91061)	Bacillaceae (186817)	Bacillus (1386)	Bacillus mycoides	Bacillales (1385)	Bacillota (1239)	Bacillus_mycoides (1405)		Bacteria (2)	-22457945	-47124248	GCF_018742245.1	35.6	MOBL	mobilizable	0	1
NZ_CP036139.1	136324	37.1	0	0	0	154	0	3	0	0	0	0	0	0	yqkB, eamA, pckA, metK, moaB, mobA, orfB, tnpB, pgpB, paaY, pldB, piuB, ccmA, mraW, yhcC, glgD, lolD, xerD, khtT, kefB, araJ, leuS, mazG2, gerHC, gerAB, gerA, mET2, pspE, gerPA, slc2, moaA, thiF, moaC, glp, mobB, moaE, moaD, glcU, fabG, cdnL, yndB, arsR, proP, yhiN, spoVB, rsuA, glpR, pepV, thpR, pulA, cotS, trmB, gloB, ytzB, frvX, yjjX, trxA, ytpQ, eMAP, amiC, ftsK, pncB, murC, padR, rimL, ampS,…		pckA, gdh, phoB	2021-06-09	0.3711892256682609			soil	136324	Poland: farmland in Jasienowka	cell culture	linear	525320559	229680514	Poland,farmland in Jasienowka			Bacilli (91061)	Bacillaceae (186817)	Bacillus (1386)	Bacillus mycoides	Bacillales (1385)	Bacillota (1239)	Bacillus_mycoides (1405)		Bacteria (2)	-22502396	-47168617	GCF_018742265.1	35.4	MOBL	mobilizable	0	3
NZ_CP036140.1	5846	33.6	0	0	0	7	0	1	0	0	0	0	0	0	uppP		phoP	2021-06-09	0.3362983236400957			soil	5846	Poland: farmland in Jasienowka	cell culture	linear	525320559	229680514	Poland,farmland in Jasienowka			Bacilli (91061)	Bacillaceae (186817)	Bacillus (1386)	Bacillus mycoides	Bacillales (1385)	Bacillota (1239)	Bacillus_mycoides (1405)		Bacteria (2)	1126184	-13609277	GCF_018742265.1	35.4	MOBL	mobilizable	0	1
NZ_CP036148.1	347238	34.1	0	0	0	302	0	26	0	0	0	0	0	0	merR, ftsK, tnpB, cxxC, dut2, gerPF, mmuM, mmuP, tnp, recU, arpU, comEC, accA, arsR, glsA, brnQ, mgtE, mgtA, ftsN, tnp, ampC, czcR, tnp, xerS, tnp, tnp, dxr, yxeA, nAGPA, mgtE, ftsW, bsh, dAP2, arsR, umuC, eamA, sdaC, sdaAA, sdaAB, yndE, ybjQ, phoP, yrzO, ald, pucR, araJ, acrR, araC, tnpB, solG, dltA, tnp, bsrC, cdnL, graR, tnp, rodA, dnaJ, hfq, copG, merR, ltrA, virB4, traM, traM, aimR, fadR	phoP	phoR, phoB, phoP	2021-06-09	0.3411204994845034			soil	347238	Poland: farmland in Jasienowka	cell culture	linear	525320559	229680514	Poland,farmland in Jasienowka			Bacilli (91061)	Bacillaceae (186817)	Bacillus (1386)	Bacillus mycoides	Bacillales (1385)	Bacillota (1239)	Bacillus_mycoides (1405)		Bacteria (2)	-2.19374e+16	-4623717299999990	GCF_018742285.1	35.6	MOBL	mobilizable	1	3
NZ_CP037921.1	190065	60.4	0	0	0	202	2	51	0	0	0	0	0	0	ynfA, merTP, mobC, parA, traG, terB, terB, traJ, traK, traM, traN, copG, parA, nmrA, 5_ureB_sRNA, ureG, ureD, chlD, porT, vbhA, tolC, tolC, copC, tolC		phoB	2019-03-21	0.6043353589561465			soil	190065	South Korea: Seoul	single cell	circular	375666791	1.26978e+16	South Korea,Seoul			Cytophagia (768503)	Hymenobacteraceae (1853232)	Hymenobacter (89966)	Hymenobacter radiodurans	Cytophagales (768507)	Bacteroidota (976)	Hymenobacter_radiodurans (2496028)		Bacteria (2)	6869076700000000	-3017799	GCF_004355185.1	54.0	MOBB	mobilizable	0	1
NZ_CP038023.1	88584	38.7	0	0	0	86	2	9	0	0	0	0	0	0	pglZ, pglX, brxC, C4, isrK, copG, repM, tnp, thsB, thsB, copG, arsH, copA, ompR, cadA, copC, copZ, tnp, tdh, tnp, tnp, czcA, cadR, feoA, feoB, arsC, arsB, arsH, trxB, arsO, uspA, brxL, pglZ, pglZ		phoB	2019-05-23	0.3874853246635961			soil	88584	Chile: Valparaiso Region	bacterial culture	circular	-325976089	-708529753	Chile,Valparaiso Region			Gammaproteobacteria (1236)	Moraxellaceae (468)	Acinetobacter (469)	Acinetobacter radioresistens	Moraxellales (2887326)	Pseudomonadota (1224)	Acinetobacter_radioresistens (40216)		Bacteria (2)	0.9694788	-8289557	GCF_005519305.1	41.8	non-mob	non-mob	0	1
NZ_CP038024.1	69207	37.0	0	0	0	77	0	11	0	0	0	0	1	1	tnp, qseB, eptA, hicB, hicA, arsR, dsbG, tlpA, dsbD, tnp, virB11, virB9, virB8, virB5, virB6, trbE, traD, trbC, topA, copG, umuC, umuD, terC, tnp, sulP, uspA		phoB, phoB	2019-05-23	0.3698325313913332			soil	69207	Chile: Valparaiso Region	bacterial culture	circular	-325976089	-708529753	Chile,Valparaiso Region			Gammaproteobacteria (1236)	Moraxellaceae (468)	Acinetobacter (469)	Acinetobacter radioresistens	Moraxellales (2887326)	Pseudomonadota (1224)	Acinetobacter_radioresistens (40216)		Bacteria (2)	0.9036181	-77356405	GCF_005519305.1	41.8	MOBP	mobilizable	0	2
NZ_CP038196.1	2238439	67.0	18	1	3	2171	3	146	0	1	0	0	0	0	traF, virD2, traG, copG, rpiR, araC, rhaT, arsR, mauE, cueR, trbB, virB2, trbD, trbE, trbJ, trbK, trbL, trbF, trbG, lysR, rdoA, tetR, caiA, paaJ, araC, lysR, dsbD, qseB, qseC, qor, caiD, narK, livK, gntR, patZN, livF, livG, livH, yurZ, lysR, insH, prpD, prpD, iclR, prpD, prpD, ygiN, yvrE, tctC, tctA, tctB, tctC, yvrE, iclR, prpD, ydfG, tnp, tnpB, lysR, iclR, yciI, lysR, virB10, trbG, trbF, trbL, …	ugpB, ugpA, ugpE, pstS, pstC, pstA, pstB, phoU, phoB, ugpE, ugpA, ugpB, ugpC, ugpE, ugpA, ugpB, ugpB, ugpE, ugpA, phnM, ugpE, ugpA, ugpB	phoB, ugpC, ugpC, ugpC, RegX3, gdh, gnd, ugpC, nrdD, nrdD, pstC, pstA, pstB, phoU, phoB, dcd, phoB, purM, purN, gmk, phoR, purD, ppk, purF, ugpC, phoB, phoB, pyrH, ugpC, ugpC, ugpE, ugpA, ugpB, purL, nrdE, nrdF, phnM, ugpC, cmk, pyrG, guaA, phoH, purB, pyrE, guaB, gntK, purC, purS, pckA, ptsH, purQ	2023-05-02	0.6701183279955362			soil adjacent to the roots of the plant Clitoria ternatea	2238439	India: West Bengal	single cell	circular	229964948	876855882	India,West Bengal			Alphaproteobacteria (28211)	Paracoccaceae (31989)	Paracoccus (265)	Paracoccus versutus	Rhodobacterales (204455)	Pseudomonadota (1224)	Paracoccus_versutus (34007)		Bacteria (2)	7230629400000000	-38490179	GCF_029909795.1	67.7	non-mob	non-mob	23	51
NZ_CP038205.1	538229	67.6	0	0	0	532	1	36	0	0	0	0	0	0	acoB, acoA, lrp, tnp, tnp, luxR, phnA, atoA, atoD, lysR, etfA, etfB, hpbA, tetR, proW, proC, glpA, lysR, hcaE, fpr, hpbD, fdhA, prdF, gntR, pucR, gabD, acnX2, allD, dctP, dctQ, dctM, hypF, dadA, ehuA, hisM, hisM, allD, dapA, gntR, iolB, iolE, iolD, iolG, lacI, ubiE, phnB, aac(3)-II, tnp, tnp, xrtE, paaZ, ydbO, paaK, paaD, paaC, paaB, paaA, pcaF, paaX, pvdQ, lysR, pcaF, atoA, atoD, iclR, tetR, dct…	phnC, phnD, phnE, phnE, phnF, phnG, phnH, phnI, phnJ, phnK, phnL, phnN, phnM	prsA, RegX3, ugpC, ugpC, ugpC, phnC, phnE, phnE, phnF, phnG, phnH, phnI, phnJ, phnK, phnL, phnN, phnN, phnM	2023-05-02	0.6756157694958838			soil associated with Quercus lobator	538229	United Kingdom: Kew, Surrey	single cell	circular	5137609725	-0.3166907755645454				Alphaproteobacteria (28211)	Paracoccaceae (31989)	Paracoccus (265)	Paracoccus pantotrophus	Rhodobacterales (204455)	Pseudomonadota (1224)	Paracoccus_pantotrophus (82367)		Bacteria (2)	7389278999999990	-3852799	GCF_029910495.1	67.5	non-mob	non-mob	13	18
NZ_CP038206.1	1499165	67.8	16	1	3	1447	0	63	0	0	0	0	0	0	dnaA, dnaN, recF, xth, hemY, dgt, osmC, prfC, nadK, glyA, lysR, nodT, adeB, acrA, tetR, etfA, etfB, pcaF, aliA, aliB, badI, marR, tnpB, fabG, oppA, ade, recO, hslJ, caiA, dapE, elaA, gsh2, acrR, ptsH, manX, rapZ, pckA, rnr, fdhD, fdhF, nuoF, nuoE, lysR, purS, purC, norM, paaI, paaI, merR, merR, caiA, paaJ, fadB, rbsK, nth, ompA, atpF, atpE, atpB, arsR, ushA, pyrD, cysE, lmaA, gp36, beeE, mltG, fa…	ugpC, pstS, pstC, pstA, pstB, phoU, phoB, ugpE, ugpA, ugpB, ugpC, ugpE, ugpA, ugpB, ugpB, ugpE, ugpA, phnM, ugpE, ugpA, ugpB	ptsH, pckA, purS, purC, gntK, guaB, pyrE, purB, purQ, ugpC, ugpC, rpiA, RegX3, phoH, guaA, pyrG, pstC, pstA, pstB, phoU, phoB, dcd, phoB, purM, purN, gmk, phoR, purD, ppk, purF, ugpC, phoB, pyrH, ugpC, ugpC, ugpE, ugpA, ugpB, purL, nrdE, nrdF, phnM, ugpC, cmk, phoB	2023-05-02	0.6777286022552554			soil associated with Quercus lobator	1499165	United Kingdom: Kew, Surrey	single cell	circular	5137609725	-0.3166907755645454				Alphaproteobacteria (28211)	Paracoccaceae (31989)	Paracoccus (265)	Paracoccus pantotrophus	Rhodobacterales (204455)	Pseudomonadota (1224)	Paracoccus_pantotrophus (82367)		Bacteria (2)	7285789500000000	-38980963	GCF_029910495.1	67.5	non-mob	non-mob	21	45
NZ_CP039340.1	1830097	67.0	4	0	3	1379	3	108	0	3	0	0	0	0	xerD, fabD, rhiA, rhiF, rhiH, rhiD, rhiI, rhiC, glnA, ftsK, pglA, fhuE, popA1, popB, sctC, hrpB, sctT, hrpB7, sctN, sctL, hrpB4, sctJ, hrpB2, hrpB1, sctU, sctV, sctP, sctQ, sctR, sctS, hrpV, hrpD5, hrpX, ompR, citB, fecR, rpoE, paaI, ybjT, hxlR, lRR, mltE, tar, pncB, nadR, uhpC, pgu1, yvrE, wcaG, garD, gudD, uhpC, adhE, kdgD, speE, prlF, yhaV, lysR, rhaT, acrA, acrB, adeC, acrR, acrR, mqo, eAL, b…		phoP, phoB, RegX3, pyk, RegX3, ptsI, phoB, phoB, phoB, nrdD, nrdD, gntK	2019-06-08	0.6702005412827845			soil	1830097	Nigeria	Cell Culture	circular	96000359	7999972099999990	Nigeria			Betaproteobacteria (28216)	Burkholderiaceae (119060)	Ralstonia (48736)	Ralstonia solanacearum	Burkholderiales (80840)	Pseudomonadota (1224)	Ralstonia_solanacearum (305)		Bacteria (2)	58260517	-40965114	GCF_006088755.1	66.9	non-mob	non-mob	0	12
NZ_CP039640.1	325924	67.5	0	0	0	235	0	26	0	0	0	0	0	0	cysN, cysD, rfbC, rfbB, rfbD, rfbA, galE, cpsB, repA, pseB, pseC, tetR, nosD, otnI, fkbM, fkbM, fkbM, wbaP, pqqD, fkbM, gmd, rfbH, rfbG, rfbF, fkbM, asnB, lpoB, fkbM, copG, aqpZ, merR, infC, flgM, metK, copG, mtnA		phoX	2019-05-03	0.6751512622574588			soil	325924	Japan	soil	circular	35.73	139.53				Alphaproteobacteria (28211)	Azospirillaceae (2829815)	Azospirillum (191)	Azospirillum sp. TSH100	Rhodospirillales (204441)	Pseudomonadota (1224)	Azospirillum_sp._TSH100 (652764)		Bacteria (2)	7100761400000000	-35889528	GCF_004923295.1	67.2	non-mob	non-mob	0	1
NZ_CP039643.1	105657	63.7	0	0	0	99	0	20	0	0	0	0	0	0	nodN, tetR, livH, lysR, ftsK, traF, traG, traI, traJ, traK, traL, traM, repB, trbB, trbC, trbD, trbJ, trbL, trbF, trbG, trbH, trbI, feoB, dedA		phoP	2019-05-03	0.637184474289446			rice paddy soil	105657	Japan	Soil	linear	35.73	139.53				Alphaproteobacteria (28211)	Azospirillaceae (2829815)	Azospirillum (191)	Azospirillum sp. TSA2s	Rhodospirillales (204441)	Pseudomonadota (1224)	Azospirillum_sp._TSA2s (709810)		Bacteria (2)	6765992	-4504631	GCF_004923315.1	67.5	non-mob	non-mob	0	1
NZ_CP039644.1	351631	66.8	0	0	0	270	1	29	0	0	0	0	0	0	yigZ, pseC, pseB, cpsB, brnA, yfhO, galE, rfbA, rfbD, rfbB, rfbC, gmd, hisH, neuB, hisH, asnB, parA, copG, marR, copG, virB11, virB9, virB8, virB6, eexN, virB5, virB4, virB3, virB2, ompA, ompA, csgF, aqpZ, copG, merR, infC, flgM, higA, mtnA, mtnP, cysN, cysD, istB, pemK, mazE		phoX	2019-05-03	0.6684706410981966			rice paddy soil	351631	Japan	Soil	circular	35.73	139.53				Alphaproteobacteria (28211)	Azospirillaceae (2829815)	Azospirillum (191)	Azospirillum sp. TSA2s	Rhodospirillales (204441)	Pseudomonadota (1224)	Azospirillum_sp._TSA2s (709810)		Bacteria (2)	7104133999999990	-36274514	GCF_004923315.1	67.5	non-mob	non-mob	0	1
NZ_CP039651.1	353832	63.7	0	0	0	398	1	114	0	0	0	0	0	0	tnp, dsbD, dsbA, tnp, tnpB, istA, istB, lysR, acrB, acrA, qdoI, lysR, istA, istB, tnpB, coiA, mobH, tnp, spoIVCA, traL, traK, traB, traV, traA, traC, trbC, traU, traN, bet, yqaJ, cobS, traF, traH, traG, flhD, lysR, istB, copG, mobI, istB, istA, vapC, mgtC, dmeF, dedA, eamA, rraA, lysR, ubiX, tnpB, csbD, ybjN, tniB, tniQ, feoA, dedA, eamA, dmeF, copA, ompR, tolC, wcaL		phoP, phoP	2019-05-03	0.6366665536186665			rice paddy soil	353832	Japan	Soil	linear	35.73	139.53				Alphaproteobacteria (28211)	Azospirillaceae (2829815)	Azospirillum (191)	Azospirillum sp. TSA2s	Rhodospirillales (204441)	Pseudomonadota (1224)	Azospirillum_sp._TSA2s (709810)		Bacteria (2)	7101485	-36638055	GCF_004923315.1	67.5	non-mob	non-mob	0	2
NZ_CP039728.1	241339	36.7	0	0	0	234	0	68	0	0	0	0	0	0	tnpB, tnpB, dnaA, radC, tnpB, tnpB, istB, istA, padR, ureH, ureD, ureG, ureF, ureE, ureC, 5_ureB_sRNA, ompR, tniQ, tnpB, tnpB, tnpB, tnpB, gspF, gspF, parA, ftsZ, thiF, sseB, dnaN, prgI, coiA, mmcB, repB, uvrX, xerS, uxaA, yesL, ebgA, araC, lacI, araC		phoB	2019-09-18	0.3673877823310779			Contaminated Mine Soils	241339	China: Hunan	whole organism	circular	276662087	1117487063	China,Hunan			Bacilli (91061)	Bacillaceae (186817)	Bacillus (1386)	Bacillus sp. S3	Bacillales (1385)	Bacillota (1239)	Bacillus_sp._S3 (486398)		Bacteria (2)	-24174488	-51000333	GCF_005154805.1	40.3	MOBL	mobilizable	0	1
NZ_CP040096.1	744154	54.5	0	0	0	684	5	43	0	0	0	0	0	0	argD, gabT, gabP, arfB, amsF, marR, cybB, mmcQ, merR, yebG, rdgB, ehuA, ssuD, ssuD, dctP, nikD, araC, padC, lysE, ompA, eptA, fhuE, ssuD, tuaH, bioY, ehuA, proP, treZ, treY, glgX, cspC, rluA, yaiL, metE, yajD, fliD, bglF, map, uraH, ftrA, eptB, lysR, malT, malP, malQ, malM, lamB, malK, malE, malF, malG, motA, potA, nikE, dppC, mgtA, pagP, cspC, ycgZ, araJ, rbsB, ccmA, araH, araH, araB, hxlR, cof,…	ugpC, ugpE, ugpC	phoB, ugpE	2019-05-15	0.5454852087068			soil	744154	China	whole organism	circular	344118455	860326902	China			Gammaproteobacteria (1236)	Erwiniaceae (1903409)	Pantoea (53335)	Pantoea sp. SO10	Enterobacterales (91347)	Pseudomonadota (1224)	Pantoea_sp._SO10 (2575375)		Bacteria (2)	24678862	1221625	GCF_005281435.1	55.1	MOBF	mobilizable	3	2
NZ_CP040642.1	451191	56.4	0	0	0	433	3	67	0	0	0	0	0	0	phnF, traG, traD, traC, traA, araC, araC, alr, tnp, mazE, fecR, istA, istB, fecR, fhuB, istA, istB, cydB, cysE, hisC, pxpA, lysR, lysR, tctB, nit2, iclR, atoD, atoA, pcaF, iclR, tctB, rraA, paaI, lysR, nthB, nthA, lysR, mviM, ycjR, lacI, ugpC, marR, gcvA, lysR, tctB, paaI, ugpC, dmmA, lhgO, gntR, ridA, pcaF, dppB, iclR, thuA, dmmA, paaI, araC, tnp, traF, himA, cheW, lysR, araC, lysR, marR, repA, …	phnF, ugpC, ugpC	ugpC, RegX3	2019-07-18	0.5642222473409265			soil	451191	China:Guangzhou Guangdong	Single strain culture	circular	232041476	1132854385	China,Guangzhou Guangdong			Alphaproteobacteria (28211)	Rhizobiaceae (82115)	Agrobacterium (357)	Agrobacterium sp. T29	Hyphomicrobiales (356)	Pseudomonadota (1224)	Agrobacterium_sp._T29 (2580515)		Bacteria (2)	6604025	-4.92136e+16	GCF_006970545.1	60.0	MOBQ	mobilizable	3	2
NZ_CP041042.1	84792	66.0	3	0	3	70	0	5	0	0	0	0	0	0	repA, repB, minE, minD, minC, dctP, fadR, denD, lysR, imp, yhaN, glgB, dedA, thiS, tenA, rrs, trnI, trnA, rrl, rrf, trnfM, dppB, gntR, nagA, vapC		ugpC	2020-04-06	0.6597202566279837			Hexachlorocyclohexane (HCH) pesticide-contaminated soil	84792	India: Lucknow, UP	pure culture	circular	268381	809346001	India,Lucknow,UP			Alphaproteobacteria (28211)	Paracoccaceae (31989)	Paracoccus (265)	Paracoccus sp. AK26	Rhodobacterales (204455)	Pseudomonadota (1224)	Paracoccus_sp._AK26 (2589076)		Bacteria (2)	7486566000000000	-4029001999999990	GCF_011801365.1	66.0	non-mob	non-mob	0	1
NZ_CP041043.1	129509	66.4	0	0	0	123	3	17	0	0	0	0	0	0	bcsQ, parB, abrB, vapC, istA, istB, mazE, rraA, araD, gntR, asnC, rocF, oCDMu, gntR, chrB, ugpC, xylA, ugpC, lacI, csbD, ubiA, gtrA, ltaE, ccmA, dnaA	ugpC, ugpC	ugpC, ugpC	2020-04-06	0.6641391717950104			Hexachlorocyclohexane (HCH) pesticide-contaminated soil	129509	India: Lucknow, UP	pure culture	circular	268381	809346001	India,Lucknow,UP			Alphaproteobacteria (28211)	Paracoccaceae (31989)	Paracoccus (265)	Paracoccus sp. AK26	Rhodobacterales (204455)	Pseudomonadota (1224)	Paracoccus_sp._AK26 (2589076)		Bacteria (2)	7384786	-39252942	GCF_011801365.1	66.0	non-mob	non-mob	2	2
NZ_CP041044.1	189213	62.9	0	0	0	197	1	34	0	0	0	0	0	0	repA, repB, repC, xerD, xerD, yhaN, copG, parD1, trbG, orfA, virB3, urcA, tnp, lspA, zntR, merR, dmeF, tolC, dmeF, yqaA, copG, ctaD, paaI, iclR, yiaO, parD		gcd	2020-04-06	0.62860374287179			Hexachlorocyclohexane (HCH) pesticide-contaminated soil	189213	India: Lucknow, UP	pure culture	circular	268381	809346001	India,Lucknow,UP			Alphaproteobacteria (28211)	Paracoccaceae (31989)	Paracoccus (265)	Paracoccus sp. AK26	Rhodobacterales (204455)	Pseudomonadota (1224)	Paracoccus_sp._AK26 (2589076)		Bacteria (2)	75293946	-40880957	GCF_011801365.1	66.0	non-mob	non-mob	0	1
NZ_CP041045.1	471727	64.9	0	0	0	435	1	27	0	0	0	0	0	0	parB, lysR, tnp, gntR, nikD, hydA, cDA1, gntR, istB, orfA, qseC, hmpA, acs, treZ, nikD, folD, purU, lysR, tnp, tnp, bamE, dsbA, dsbB, lysM, merR, lspA, mntR, hlyD, hdeD, hlyD, marR, tetR, gfdT, devR, pedF, paaX, pcaF, paaA, paaB, paaC, paaD, paaZ, paaK, paaI, paaG, paaN, livH, livH, lptB, livF, msuE, yghX, vapC, gntR, tctA, tctB, glxA, glxA, dadA, rbsC, rbsA, xylA, marR, doxX, ugpC, pfkB, ugpE, l…	ugpC, ugpE	ugpC, RegX3, RegX3, ugpC, ugpC	2020-04-06	0.648977056645051			Hexachlorocyclohexane (HCH) pesticide-contaminated soil	471727	India: Lucknow, UP	pure culture	circular	268381	809346001	India,Lucknow,UP			Alphaproteobacteria (28211)	Paracoccaceae (31989)	Paracoccus (265)	Paracoccus sp. AK26	Rhodobacterales (204455)	Pseudomonadota (1224)	Paracoccus_sp._AK26 (2589076)		Bacteria (2)	73966384	-38855658	GCF_011801365.1	66.0	non-mob	non-mob	2	5
NZ_CP041514.1	203764	52.1	0	0	0	253	1	22	0	4	0	0	0	0	ccdB, ccdA, vagC, vapC, ymiA, emrA, sunT, vagC, vapC, uvrD, insE, tnpB, tnp, silE, silS, silR, silC, silF, silB, silA, copG, silP, nlpD, pcoA, pcoB, pcoC, pcoD, pcoR, pcoS, pcoE, glpF, mnaT, arsR, arsH, rpoE, arsA, arsA, mnaT, arsC, arsB, arsA, tnp, arsD, arsR, ydeA, yaeB, phnO, tnp, tnp, cadR, lspA, tnpA, tnpR, chrA, padR, arsB, arsC, arsR, dps, nifX, lolD, lolC, acrA, acrR, eamA, tnp, arsC, ars…	phnO	RegX3, phoB	2019-07-30	0.5206366188335525			soil	203764	South Korea	cell culture	circular	365581914	1279408564	South Korea	IncFII(pKP91)_1, CP000966, |IncFIB(K)_1, JN233704,	IncF RST(F-:A-:B-):FIA(-);FIB(-);FIC(-);FII(-);FIIK(17?);FIIS(-);FIIY(10?)	Gammaproteobacteria (1236)	Enterobacteriaceae (543)	Klebsiella (570)	Klebsiella michiganensis	Enterobacterales (91347)	Pseudomonadota (1224)	Klebsiella_michiganensis (1134687)		Bacteria (2)	0.1719848	20710614	GCF_007106885.1	55.9	MOBF	mobilizable	1	2
NZ_CP041517.1	151023	34.2	0	0	0	180	6	38	0	0	0	0	0	0	eamA, ycnI, copC, copG, merR, lysE, fbpA, abrB, araC, chrB, ybjG, arlS, arlR, dedA, mreC, marR, ureC, 5_ureB_sRNA, ureE, ureF, ureG, ureD, padR, yrvL, yaiI, lacI, iolB, iolD, fba, lysR, merR, csaA, araC, doxX, ugpE, ugpA, lacI, psiE	ugpE, ugpA	phoB	2019-07-29	0.3423054766492521			soil	151023	South Korea	cell culture	circular	365581914	1279408564	South Korea			Bacilli (91061)	Bacillaceae (186817)	Priestia (2800373)	Priestia aryabhattai	Bacillales (1385)	Bacillota (1239)	Priestia_aryabhattai (412384)		Bacteria (2)	-0.76184905	-4752280000000000	GCF_007106705.1	38.3	MOBL	mobilizable	2	1
NZ_CP042167.1	239952	62.0	1	0	0	269	1	46	0	0	0	0	0	0	tnpB, dsbD, tnp, istA, istB, trnG, tnp, merR, merT, merP, merA, merB, merE, dmeF, yncE, tniQ, mreD, vapC, trfA, lysR, tnpB, dsbD, pgaD, pezT, traG, traH, traF, traN, traN, trbC, traU, lepB, trbI, traC, traV, traB, traK, traE, traL, traA, mobF, mobC, arsN2, arsH, arsC, arsB, arsR, tnpB, tnp, istB, istA, istB, copD, copC, lysR, ompC, baeS, irlR, cusA, czcB, tolC, tnp, dsbD, cueR, petA, cueR		phoP, phoB	2019-08-06	0.6198823097952924			soil	239952	China	soil	circular	344118455	860326902	China			Betaproteobacteria (28216)	Burkholderiaceae (119060)	Burkholderia (32008)	Burkholderia contaminans	Burkholderiales (80840)	Pseudomonadota (1224)	Burkholderia_contaminans (488447)		Bacteria (2)	5349825	-35748549	GCF_007724625.1	66.0	MOBP	mobilizable	0	2
NZ_CP042262.1	448990	58.7	0	0	0	416	1	43	0	0	0	0	0	0	parB, nikD, rraA, gntR, rbsB, ccmA, araH, rbsK, gatZ, purR, tcuB, tcuA, ggt, trkA, terB, ccdB, ccdA, galE, vanZ, lacI, rbsC, lacI, dctP, groL, gmd, rfbC, araD, gntR, glnQ, yecS, gntR, rbsA, phnE, phnE, phnC, gntR, nikD, rskA, potA, gntR, hlyD, bapA, gapA, arsJ, merR, mtnN, gloA, iolG, iolD, iolE, nikC, lysR, pcaD, catC, yciI, rraA, fadR, tctB, uxuA, gntR, ugpC, argH, ugpE, iclR, arsR, nhaC	phnE, phnE, phnC, ugpC, ugpE	phnE, phnC, ugpC	2019-08-12	0.5865342212521437			saline soil	448990	China: Inner Mongolia	cell culture	circular	432443242	1143251664	China,Inner Mongolia			Alphaproteobacteria (28211)	Paracoccaceae (31989)	Qingshengfaniella (2816884)	Qingshengfaniella alkalisoli	Rhodobacterales (204455)	Pseudomonadota (1224)	Qingshengfaniella_alkalisoli (2599296)		Bacteria (2)	7415992999999990	-39368608	GCF_007855645.1	59.1	MOBQ	mobilizable	5	3
NZ_CP042263.1	382321	59.7	1	0	0	305	1	14	0	0	0	0	0	0	metR, metE, fadR, lacI, ugpC, ridA, iclR, glxA, vapC, potA, lacI, tctB, araD, rraA, murB, proC, putA, betA, betB, betC, betI, choW, choV, tctB, gntR, lysR, trnS, lacI, ugpE, cydB, mnmH, selD, nikD, ugpC, araC, kduD, kduI, ytfQ, ytfR, yjfF, fadR, ugpC, ugpC, gntR, cutC, ugpC, ridA, ompA, tagF, tssM, icmH, tssK, tagH, vgrG, tssB, tssH, tssG, tssF, tssE, sciE, tssC, tssB, tssA, lysR, hemP, lpdA, ace…	ugpC, ugpE, ugpC, ugpC, ugpC, ugpC	ugpC, ugpC, ugpC, ugpC, ugpC, ugpC, ugpC, ugpC	2019-08-12	0.597223275729034			saline soil	382321	China: Inner Mongolia	cell culture	circular	432443242	1143251664	China,Inner Mongolia			Alphaproteobacteria (28211)	Paracoccaceae (31989)	Qingshengfaniella (2816884)	Qingshengfaniella alkalisoli	Rhodobacterales (204455)	Pseudomonadota (1224)	Qingshengfaniella_alkalisoli (2599296)		Bacteria (2)	7549899000000000	-39462304	GCF_007855645.1	59.1	non-mob	non-mob	6	8
NZ_CP042264.1	323281	59.1	4	0	3	298	0	23	0	0	0	0	0	0	parB, ugpE, ugpC, gntR, nikD, abrB, gntR, gntR, allB, dctP, gntR, ugpC, tdh, trnM, gntR, vapC, tdh, nqrM, nqrE, nqrF, luxR, lysR, tctB, argE, sbsA, sbsA, yajL, rbsB, araH, gntR, abrB, pdxA, gntR, tctB, arcC, yfcC, hlyD, rbbA, trnfM, rrf, rrl, trnI, trnA, rrs, speB, lysR, aceB, thuA, lacI, ccoS, fixH, ccoG, ccoP, ccoO, ccoN, mmsB, speB, exbD, exbD, lptB, lptA, lptC, gpmI, rlmH, rsfS, leuB, pcaF, l…	ugpE, ugpC, ugpC	ugpC, ugpC	2019-08-12	0.5914452132974101			saline soil	323281	China: Inner Mongolia	cell culture	circular	432443242	1143251664	China,Inner Mongolia			Alphaproteobacteria (28211)	Paracoccaceae (31989)	Qingshengfaniella (2816884)	Qingshengfaniella alkalisoli	Rhodobacterales (204455)	Pseudomonadota (1224)	Qingshengfaniella_alkalisoli (2599296)		Bacteria (2)	7503755	-40598083	GCF_007855645.1	59.1	MOBQ	mobilizable	3	2
NZ_CP042265.1	516857	58.8	0	0	0	487	0	39	0	0	0	0	0	0	parB, aroQ, yebA, mauE, cueR, lacI, xdhA, xdhB, xdhC, dctM, adhP, tniQ, tnsA, lysR, gstA, hxlR, caiB, livK, fabG, livG, gntR, pncA, caiB, citE, lysR, lysR, lysR, tnp, araC, tnp, aztA, aztB, lysR, phnC, phnD, phnE, phnE, phnF, phnG, phnH, phnI, phnK, phnL, phnN, ilvA, hslO, lysE, hemH, grxC, ubiG, pip, rimP, nusA, infB, mutT, argJ, secA, radC, dnaJ, dnaK, alkB, cysQ, galU, lysR, phoB, phoU, pstB, …	phnC, phnD, phnE, phnE, phnF, phnG, phnH, phnI, phnK, phnL, phnN, phoB, phoU, pstB, pstA, pstC, ugpC	ugpC, phoP, phnC, phnD, phnE, phnE, phnH, phnI, phnJ, phnK, phnL, phnN, phoB, pstB, pstA, pstC, ugpC, ugpC, nrdE, nrdF	2019-08-12	0.5876847948271959			saline soil	516857	China: Inner Mongolia	cell culture	circular	432443242	1143251664	China,Inner Mongolia			Alphaproteobacteria (28211)	Paracoccaceae (31989)	Qingshengfaniella (2816884)	Qingshengfaniella alkalisoli	Rhodobacterales (204455)	Pseudomonadota (1224)	Qingshengfaniella_alkalisoli (2599296)		Bacteria (2)	74025064	-4091858	GCF_007855645.1	59.1	MOBQ	mobilizable	17	20
NZ_CP042332.1	459027	64.1	3	0	3	477	5	69	0	0	0	0	0	0	hlyD, mucR, doxX, potA, ridA, istB, mucR, tnpB, marR, lysR, dsbA, cydB, poxB, lysR, hlyD, htpG, groL, groES, cspC, hlyD, repA, repB, repC, scpB, gloA, alr, lacI, gntR, lysR, lysR, lysR, gntR, capA, lysR, rraA, tnpB, orfB, iclR, iclR, ydiF, gntR, ugpE, ehuB, gntR, aac(3)-I, livH, hutI, hutI, potC, potA, cynS, ntrB, ubiE, paoA, lysR, glnQ, gntR, lysR, lysR, grpE, dnaK, cbpM, rrs, trnI, trnA, rrl, r…	ugpE	ugpC, ugpC, ugpC	2019-09-14	0.6405222350754967	soybean		rhizosphere soil	459027	China: guangxi	soil sample	circular	24.0	109.0	China,guangxi			Alphaproteobacteria (28211)	Boseaceae (2831100)	Bosea (85413)	Bosea sp. F3-2	Hyphomicrobiales (356)	Pseudomonadota (1224)	Bosea_sp._F3-2 (2599640)		Bacteria (2)	7044703	-4253291	GCF_008253865.1	65.6	MOBQ	mobilizable	1	3
NZ_CP043439.1	347552	60.0	0	0	0	440	5	196	0	0	0	0	0	0	brnA, tetR, rocR, bphC, todJ, dmpG, ompW, lysR, tnp, vapB, vapC, gmtX, gmtY, dsbD, tctB, lepB, cheY, traN, tnp, araC, dnaJ, ykvA, tnpA, ugpE, deoR, tnp, tnp, cysL, yciW, araC, araC, spoIVCA, merE, merD, merA, merP, merT, merR, traW, traU, trbC, rdgC, ompA, traL, traK, traB, traV, traA, traC, trbI, lepB, traF, traH, traG, traN, moxR, tnpB, parA, parB, repB	ugpE	ugpC	2019-09-14	0.6003677147592302			soil	347552	South Korea	cell culture	circular	365581914	1279408564	South Korea			Betaproteobacteria (28216)	Burkholderiaceae (119060)	Cupriavidus (106589)	Cupriavidus campinensis	Burkholderiales (80840)	Pseudomonadota (1224)	Cupriavidus_campinensis (151783)		Bacteria (2)	54622903	-2969727	GCF_008271425.1	66.2	MOBQ	mobilizable	1	1
NZ_CP043441.1	2786414	66.2	7	0	6	2587	57	254	0	0	0	0	0	0	serA, xerD, lysR, argH, lacI, caiB, tctC, iclR, sigK, sfnB, sfnB, ahpD, kefB, nodT, hxlR, araJ, lysR, araC, czcA, tolC, aspA, pyrC, naiP, mdeB, lysR, lysR, tnp, lysR, araC, tra8, lysR, araC, gstA, ggt, tctC, rspA, bugD, araC, phaZ, yncA, tniQ, lysR, lacI, tctC, insH, lacI, marR, lacI, glcE, marR, lysR, proP, virS, kfrA, doxX, dacC, lysR, ompR, luxR, cadA, flgB, czcE, czcS, czcR, czcD, czcA, czcB,…		gnl, pyrE, phoB, phoB, phnW, phoB, phoB, phoX, phoX, gnl, phoB, phoP, phoB, phnM, purB, phoB	2019-09-14	0.6622156650088609			soil	2786414	South Korea	cell culture	circular	365581914	1279408564	South Korea			Betaproteobacteria (28216)	Burkholderiaceae (119060)	Cupriavidus (106589)	Cupriavidus campinensis	Burkholderiales (80840)	Pseudomonadota (1224)	Cupriavidus_campinensis (151783)		Bacteria (2)	5759759	-31610992	GCF_008271425.1	66.2	non-mob	non-mob	0	16
NZ_CP043647.1	64818	54.8	0	0	0	74	0	19	0	0	0	0	0	0	parA, traM, yncE, traN, traM, traK, traJ, traI, terB, traG		phoB	2020-08-18	0.5481193495633929			soil	64818	Antarctica: Herring Island	pure culture	linear	-6641138889	11065833333				Cytophagia (768503)	Hymenobacteraceae (1853232)	Hymenobacter (89966)	Hymenobacter sp. NBH84	Cytophagales (768507)	Bacteroidota (976)	Hymenobacter_sp._NBH84 (2596915)		Bacteria (2)	6952851	-3001997	GCF_014217645.1	56.5	MOBB	mobilizable	0	1
NZ_CP043649.1	125550	56.0	2	0	0	128	1	33	0	0	0	0	0	0	galA, bamE, araC, csgG, csgF, csgE, parA, trnQ		phoX	2020-08-18	0.5598486658701712			soil	125550	Antarctica: Herring Island	pure culture	circular	-6641138889	11065833333				Cytophagia (768503)	Hymenobacteraceae (1853232)	Hymenobacter (89966)	Hymenobacter sp. NBH84	Cytophagales (768507)	Bacteroidota (976)	Hymenobacter_sp._NBH84 (2596915)		Bacteria (2)	72823668	-3043684	GCF_014217645.1	56.5	MOBV	mobilizable	0	1
NZ_CP043960.1	408250	67.8	0	0	0	436	8	101	0	0	0	0	0	0	lysR, wrbA, dedA, tetR, wrbA, lysR, marR, marR, dsbA, ssgA, tetR, dsbA, marR, marR, copG, tpgA2, menH, lysR, lacI, ugpA, ugpE, marR, ybjT, araC, ssgA, hicB, vioD, mbtH, gntD, marR, tnp, lpd, osmC, dsbA, espC, dsbA, marR, gntR, dsbA, tnp, tnp, merR, tnp, merR, dsbA, nhaA, fadR, fadR, uppS, tetR, yurZ, marR	ugpA, ugpE	phoB	2019-09-27	0.6784445805266381			soil	408250	China: Sichuan	microorganism	circular	305000001	1024999999	China,Sichuan			Actinomycetes (1760)	Streptomycetaceae (2062)	Streptomyces (1883)	Streptomyces tendae	Kitasatosporales (85011)	Actinomycetota (201174)	Streptomyces_tendae (1932)		Bacteria (2)	7225536999999990	-29675238	GCF_008632955.1	72.5	non-mob	non-mob	2	1
NZ_CP044217.1	293638	61.4	0	0	0	307	1	44	0	0	0	0	0	0	msrP, msrQ, hemH, tspO, istA, istB, groES, groL, ar14, dinB, ar35, brkB, xth, ligD, ykoV, coxB, Atu_At1, cheR, cheB, brkB, copC, istA, copG, msrA, tspO, lrgB, lrgA, tnp, potA, dadA, araC, lysR, istA, istB, trbC, virB4, trbL, virB9, virB11, traG, traA, phoU, ardC, argG, nicK, repC, ctRNA_p42d, repB, repA, lysR, tauA, gntR, lysR, dabB, dabA	phoU	phoR	2019-10-07	0.6138646905373283			soil	293638	South Korea: Jangsu	soil	circular	35647	1275212	South Korea,Jangsu			Alphaproteobacteria (28211)	Phyllobacteriaceae (69277)	Mesorhizobium (68287)	Mesorhizobium terrae	Hyphomicrobiales (356)	Pseudomonadota (1224)	Mesorhizobium_terrae (2725666)		Bacteria (2)	67849436	-46251206	GCF_008727715.1	63.3	MOBQ	mobilizable	1	1
NZ_CP045023.1	359606	32.3	0	0	0	336	1	28	0	3	0	0	0	0	araC, adhE, nrdG, nrdD, tnp, ald, tdcB, potE, aprE, scfA, scfB, tnp, tnp, lolD, tnpB, gldA, dhaK, dhaL, manY, manZ, fosB, tnp, capA, ldcB, qdoI, ftsN, uvrA, tnp, tnpB, sulP, ftsK, ald, tdcB, argR, bglG, manA, yycF, mmuP, mmuM, qdoI, xerS, nAGPA, mgtE, ftsW, tnp, tnp, rfbD, rfbB, rfbC, rfbA, fabF, gcvT, fabZ, merR, arsR, asnB, frmB, tnp, ftsI, rpoE, rodA, cspD, bsrC, czcR, araJ, acrR, tnp, gntR, t…		nrdD, phoR, phoB, dut	2019-10-17	0.3232676874134469			soil	359606	China: Nanjing	whole organism	circular	3.2061e+16	1.18792e+16	China,Nanjing			Bacilli (91061)	Bacillaceae (186817)	Bacillus (1386)	Bacillus thuringiensis	Bacillales (1385)	Bacillota (1239)	Bacillus_thuringiensis (1428)		Bacteria (2)	-2.52407e+16	-45580072	GCF_009025915.1	35.3	MOBL	mobilizable	0	4
NZ_CP045296.1	896837	52.8	0	0	0	780	1	20	0	0	0	0	0	0	cobW, rpsN, feoB, dinB, nagZ, lysR, arsR, araC, gntR, lplB, yhaU, yitT, lacI, rbsK, rbsD, ccmA, rbsC, rbsB, dinB, tetR, yesM, ytcQ, yteP, grpB, tetR, queF, queE, queD, queC, merR, pxpB, abrB, arsR, araC, estA, cysI, lysR, eamA, araC, yicI, pyrH, tetR, ykvO, gerQ, gerQ, trmB, lplB, tenA, thiM, araC, marR, vat, tetR, mocR, frmB, pdaB, lacI, sigA, thuA, yjcZ, tetR, araC, dnaA, marR, tetR, mutT, glpX…	phoB	pyrH, ptsI, ugpA, ugpA, gnd, phoB, RegX3, phoP, phoB, phoB	2019-10-28	0.5275607496122484			Thai soil	896837	South Korea	cell culture	circular	365581914	1279408564	South Korea			Bacilli (91061)	Paenibacillaceae (186822)	Paenibacillus (44249)	Paenibacillus cellulositrophicus	Bacillales (1385)	Bacillota (1239)	Paenibacillus_cellulositrophicus (562959)		Bacteria (2)	11159026	-17529026	GCF_009363095.1	53.1	MOBQ	mobilizable	1	10
NZ_CP045303.1	321600	61.7	0	0	0	361	4	66	0	0	0	0	0	0	parB, copG, PrrB_RsmZ, iS5, ompR, yafQ, relB, chpB, pbsX, tnpB, higA, relE, araC, eamA, tnp, eamA, tnpB, tnpB, lysR, tssA, lysR, araC, vagC, vapC, tnpA, vapC, C4, PrrB_RsmZ, relE, tnpB, parB, parA, umuD, marR, parW, orfB, ltrA, recT, yfcL, mobH, traL, traE, traK, traB, traV, brxL, pglZ, pglX, brxC, traA, traC, trbI, trbC, traU, traF, traH, traG, tnpB, ltrA, ltrA, ltrA, prnA, prnB, prnC, prnD, vap…		ugpC	2019-10-28	0.6171766169154229			soil	321600	South Korea	cell culture	circular	365581914	1279408564	South Korea			Gammaproteobacteria (1236)	Pseudomonadaceae (135621)	Azotobacter (352)	Azotobacter salinestris	Pseudomonadales (72274)	Pseudomonadota (1224)	Azotobacter_salinestris (69964)		Bacteria (2)	60525556	-28570318	GCF_009363155.1	65.9	non-mob	non-mob	0	1
NZ_CP045548.1	508575	70.9	0	0	0	451	3	62	0	0	0	0	0	0	yqaJ, cas6e, cas5e, cas7e, casB, casA, jmjC, salK, lysR, doxX, lysR, lysR, yncE, luxR, araC, lysR, lysR, dmpG, alr, tetR, tetR, tetR, efeB, cdaR, lacI, gntR, ubiH, acrR, ubiH, acrR, cseB, lysR, eccB, eccD, spoVK, tetR, tetR, ltrA, gntD, dapF, yitT, tetR, tetR, sigE, sigE, tetR, yqjQ, dsbC, menC, pucR, lysR, murA, mazE7, lysM, gspF, gspF, parA, flgA, tcpC, tatA, dprA, ompA, parB, ssgA		phoB, phoP, phoB, phoB	2019-11-03	0.7086467089416507			soil	508575	China: Yunnan province	cell culture	linear	25.0	102.0	China,Yunnan province			Actinomycetes (1760)	Streptomycetaceae (2062)	Streptomyces (1883)	Streptomyces sp. SYP-A7193	Kitasatosporales (85011)	Actinomycetota (201174)	Streptomyces_sp._SYP-A7193 (2662065)		Bacteria (2)	7293549	-29793417	GCF_009495655.1	72.2	non-mob	non-mob	0	4
NZ_CP045549.1	120680	72.7	0	0	0	120	0	11	0	0	0	0	0	0	dsbA, rfbA, tauC, tauB, tauA, cysN, cysD, copG, tetR, copG, vapC, ubiE, marR, repL, parA, repL2, marR, scbR, mmdA, scbR, tcmN, rsxB, purB, menH, hxlR, araC, araC, skfE, rfbB, hemG		purB, RegX3	2019-11-03	0.7265246934040438			soil	120680	China: Yunnan province	cell culture	circular	25.0	102.0	China,Yunnan province			Actinomycetes (1760)	Streptomycetaceae (2062)	Streptomyces (1883)	Streptomyces sp. SYP-A7193	Kitasatosporales (85011)	Actinomycetota (201174)	Streptomyces_sp._SYP-A7193 (2662065)		Bacteria (2)	71629663	-32870471	GCF_009495655.1	72.2	non-mob	non-mob	0	2
NZ_CP045607.2	584798	32.4	2	0	0	509	9	78	0	2	0	0	0	0	ubiG, tnp, lytD, qdoI, dsdA, cDA1, acrR, asnB, tnpA, ycgB, tnpB, bdbC, trnV, tet, echA8, zmaJ, zmaL, zmaN, zmaQ, kabB, kabC, kabD, sbnA, sbnB, panD, menE, dltA, dltA, lepB, tnp, tnpB, ltrA, tnp, tnpB, spsB, pseC, pseG, pseH, pseI, ssuD, ompR, menH, tetR, araC, xerS, lytB, nAGPA, mgtE, tnpB, ftsW, hfq, bsh, gadA, eboC, tatD, rimI, tetR, hfq, lrp, potE, hfq, deoR, gntR, eamA, gntR, sbnB, sbnA, dltA…		RegX3, phoR	2019-11-04	0.3242418749722126			soil	584798	Australia:Melbourne	Whole organism	circular	-3.78142e+16	1449631608	Australia,Melbourne			Bacilli (91061)	Bacillaceae (186817)	Bacillus (1386)	Bacillus cereus	Bacillales (1385)	Bacillota (1239)	Bacillus_cereus (1396)		Bacteria (2)	-26440487	-4500706	GCF_009497015.2	35.3	MOBL	mobilizable	0	2
NZ_CP045608.2	280820	32.5	0	0	0	239	3	20	0	0	0	0	0	0	blaIII, rpoE, ftsI, rodA, copY, gerAC, gerAB, gerAA, brnQ, glsA, fabZ, gcvT, fabF, rfbA, rfbC, rfbB, rfbD, mmuM, mmuP, manA, argR, ltrA, yndE, gerA, bclA, tnp, tdcB, ald, ftsK, ftsN, lolD, vanR, prsA, algI, tetR, arsR, araC, adhE, nrdG, nrdD, tnp, ald, tdcB, potE, scfA, scfB, lolD, tnp, gldA, dhaK, dhaL, manY, hfq, lysR		phoB, nrdD, phoR, phoB	2019-11-04	0.3251727084965458			soil	280820	Australia:Melbourne	Whole organism	circular	-3.78142e+16	1449631608	Australia,Melbourne			Bacilli (91061)	Bacillaceae (186817)	Bacillus (1386)	Bacillus cereus	Bacillales (1385)	Bacillota (1239)	Bacillus_cereus (1396)		Bacteria (2)	-25388117	-4574895400000000	GCF_009497015.2	35.3	MOBL	mobilizable	0	4
NZ_CP046454.1	83516	62.7	0	0	0	81	0	9	0	0	0	0	0	0	mobF, repA, copG, dinB, merA, cadA, cadA, arsR, copC, arsR, dsbC, araC, kmtR, entS, fieF, fieF, ccsB, resA, cueP, phoP	phoP	phoP, phoR	2019-12-11	0.6265386273288951			soil from a small paddock	83516	Germany: Vilsendorf, Bielefeld	pure culture	circular	520814444	85468611				Actinomycetes (1760)	Corynebacteriaceae (1653)	Corynebacterium (1716)	Corynebacterium comes	Mycobacteriales (85007)	Actinomycetota (201174)	Corynebacterium_comes (2675218)		Bacteria (2)	62778907	-23738184	GCF_009734405.1	66.4	non-mob	non-mob	1	2
NZ_CP046581.1	325969	59.0	0	0	0	280	1	9	0	0	0	0	0	0	vapC, lysR, ytcJ, pncA, xapX, luxR, fliB, lysR, malT, malP, malQ, malG, malF, malE, malK, lamB, malM, relE, yciT, ftsK, araC, menH, merR, hipA, lysR, sok, ehuA, araJ, frsA, ompR, walK, qdoI, aRA1, tetR, tetR, nemA, lysR, hpaR, hpaE, hpaD, hpaH, hpaI, hpaX, hpaA, hpaB, hpaC, lysR, arpA, lprI, fucP, rbsK, fhuE, thiF, thiS, zigA, betT, gntR, nikD, eamA, tetR, eamA, hns, nikD, repA, parA, parB, lysR,…		ugpC, gdh, ugpC, RegX3	2021-05-12	0.5896327564891141			soil	325969	China: Qiqihar	Soil	circular	473523672	1239164653	China,Qiqihar			Gammaproteobacteria (1236)	Erwiniaceae (1903409)	Erwinia (551)	Erwinia sp. E602	Enterobacterales (91347)	Pseudomonadota (1224)	Erwinia_sp._E602 (2675378)		Bacteria (2)	0.7093223000000001	35463638	GCF_018141005.1	58.9	MOBF	mobilizable	0	4
NZ_CP047312.1	504084	56.3	0	0	0	623	2	226	0	0	0	0	0	0	relE, tnp, recA, recA, dnaN, parB, repA, csrA, pilZ, rdgC, araC, pnuC, marR, yheU, korB, ompA, cdiI, relE, tnp, yejK, ftsH, cdiI, ykgJ, vbhA, cdiI, orn, cdiI, traH, traG, traB, traK, yrrC, araC, pobA, tnp, dksA, vapC, tniB, kfrA, stbD, istA, istB, merR, merT, merP, merP, merT, merR, tnp, tetR, xerC, tetR, dmeF, frmR, umuC, padR, tnp, lysR, xerC3, tonB, kfrA, trfA, terZ, sdaR, terD, terB, pilZ, pi…		ppk	2021-05-13	0.5628665063759215			soil sample	504084	China	whole organism	circular	344118455	860326902	China			Gammaproteobacteria (1236)	Pseudomonadaceae (135621)	Pseudomonas (286)	Pseudomonas putida	Pseudomonadales (72274)	Pseudomonadota (1224)	Pseudomonas_putida (303)		Bacteria (2)	39220963	25870152	GCF_018141045.1	61.3	non-mob	non-mob	0	1
NZ_CP047313.1	388915	56.1	0	0	0	435	0	155	0	0	0	0	0	0	tnp, yejK, hipA, dnaJ, tnp, tnp, tnp, ltrA, tnpB, tnp, sulP, uspA, dksA, yjiK, tetR, tnp, ardR, tra5, insE, tnsA, traX, yqaA, znuA, chrA, tnp, copB, ptrA, ompR, czcA, htpX, copB, tnp, copR, copS, cadR, tnp, tnp, czcD, ompR, baeS, arnT, wcaA, gtrA, lysR, cadA, cusA, acrA, tolC, ompR, copB, insH, ltrA, tnp, copD, copC, copR, tra5, insE, parA, trfA, kfrA, tolC, tnp, czrR, chrA, chrB, dedA, traX, mer…		phoB, phoB, phoP, RegX3, phoB	2021-05-13	0.5609606212154327			soil sample	388915	China	whole organism	circular	344118455	860326902	China			Gammaproteobacteria (1236)	Pseudomonadaceae (135621)	Pseudomonas (286)	Pseudomonas putida	Pseudomonadales (72274)	Pseudomonadota (1224)	Pseudomonas_putida (303)		Bacteria (2)	36710622	-22868686	GCF_018141045.1	61.3	MOBH	mobilizable	0	5
NZ_CP048420.1	71465	62.9	0	0	0	75	1	22	0	0	0	0	0	0	kdpA, kdpF, torF, repB, rfbA, rfbB, parA, wcaI, gmd, kdpD, kdpC, kdpB, kdpA		phy, phoP	2020-03-02	0.6286014132792276			soil	71465	South Korea	Cell	circular	365581914	1279408564	South Korea			Alphaproteobacteria (28211)	Sphingomonadaceae (41297)	Sphingomonas (13687)	Sphingomonas insulae	Sphingomonadales (204457)	Pseudomonadota (1224)	Sphingomonas_insulae (424800)		Bacteria (2)	6748106	-34641516	GCF_010450875.1	67.0	MOBQ	mobilizable	0	2
NZ_CP048421.1	192928	63.7	0	0	0	192	0	33	0	0	0	0	0	0	csbD, araC, paaI, ethD, ridA, tetR, fucP, iclR, trbM, virB4, virB11, lysR, alkB, dinB, parA, imuB, repA, repC, nmrA, nmrA, merR, nhaA, brkB		gcd	2020-03-02	0.6365276165201526			soil	192928	South Korea	Cell	circular	365581914	1279408564	South Korea			Alphaproteobacteria (28211)	Sphingomonadaceae (41297)	Sphingomonas (13687)	Sphingomonas insulae	Sphingomonadales (204457)	Pseudomonadota (1224)	Sphingomonas_insulae (424800)		Bacteria (2)	6746614999999990	-35414994	GCF_010450875.1	67.0	MOBQ	mobilizable	0	1
NZ_CP048424.1	256449	60.4	0	0	0	256	0	32	0	0	0	0	1	0	eamA, ridA, lysR, luxR, rraA, lysR, tnp, ompR, traH, traB, Atu_Ti1, traF, traA, traC, traD, traG, serA, ardC, argG, suhB, ar15, arsK, arsH, arsC, arsB, arsR, iolE, iolD, iolG, mglC, hipA, vapB, vapC, repC, ctRNA_p42d, repB, repA, repC, trbB, trbD, virB4, trbJ, trbL, trbF, trbG, trbH, trbI, ccmA, lrgB, rmlC, copC, tctB, tetR, relB, hxsA, hxsC, hxsB, ligD, ehuA, gntR, purR, agaS, ugpB, ugpA, ugpE, …	ugpB, ugpA, ugpE, ugpC	ugpC, RegX3, ugpC	2020-03-02	0.6043618809197929			soil	256449	South Korea	Cell	circular	365581914	1279408564	South Korea			Alphaproteobacteria (28211)	Rhizobiaceae (82115)	Rhizobium (379)	Rhizobium daejeonense	Hyphomicrobiales (356)	Pseudomonadota (1224)	Rhizobium_daejeonense (240521)		Bacteria (2)	66675334	-47368283	GCF_010450895.1	60.5	MOBQ	mobilizable	4	3
NZ_CP048425.1	307615	59.5	3	0	3	280	0	17	0	0	0	0	0	0	hydA, tnp, tetR, araC, tnp, lysR, lysR, opgC, lysR, prpF, tauA, tauB, tauC, dppB, tnpB, argG, lysR, tnp, fecR, fhuB, araC, napA, napD, napF, napE, hupH, dltE, glxA, gntR, lysR, ar14, tetR, acrB, deoR, lacI, gsiC, lysA, lysR, araC, gntR, lysR, lmbE, tctA, tctB, lysR, glgX, ugpC, lysR, lysR, lysR, acnB, potA, potC, potB, potD, hipB, rrs, trnI, trnA, rrl, rrf, trnfM, groL, lysR, glxA, menH, yqiJ, yq…	ugpC	ugpC, ugpC	2020-03-02	0.5948507062399427			soil	307615	South Korea	Cell	circular	365581914	1279408564	South Korea			Alphaproteobacteria (28211)	Rhizobiaceae (82115)	Rhizobium (379)	Rhizobium daejeonense	Hyphomicrobiales (356)	Pseudomonadota (1224)	Rhizobium_daejeonense (240521)		Bacteria (2)	6.911e+16	-4304532	GCF_010450895.1	60.5	MOBQ	mobilizable	1	2
NZ_CP048426.1	236493	60.6	0	0	0	199	0	10	0	0	0	0	0	0	ugpC, ugpE, lacI, hipB, rhaM, rhaS, rhaD, rhaI, nikD, marR, dppB, adhE, yjiC, potA, potC, potB, potD, scpB, repC, ctRNA_p42d, repB, repA, nikD, pip, lysR, lysR, oqxB, betA, ugpE, ugpB, lacI, ydiF, lacI, pcaF, iclR, minE, minD, minC, yjfF, ccmA, ytfQ, alr, kdpC, kdpB, kdpA, paaX, nikD, doxX, xapX, gntR, pdxA, eamA, nikE, iolG, rpiR, iolD, iolE, iolB, ccmA	ugpC, ugpE, ugpE, ugpB	ugpC, ugpC, ugpC, phoB	2020-03-02	0.6064365541474801			soil	236493	South Korea	Cell	circular	365581914	1279408564	South Korea			Alphaproteobacteria (28211)	Rhizobiaceae (82115)	Rhizobium (379)	Rhizobium daejeonense	Hyphomicrobiales (356)	Pseudomonadota (1224)	Rhizobium_daejeonense (240521)		Bacteria (2)	7096205	-4158279	GCF_010450895.1	60.5	MOBQ	mobilizable	4	4
NZ_CP048886.1	157203	33.8	5	0	0	183	4	39	0	0	0	0	0	0	dinB, cshA, spxA, lysR, sASP-C4, merR, norA, copG, hxlR, dinB, hutU, hutI, hutG, hutH, lysE, lprI, yoyH, yxeA, fecD, fabH, grpB, ykoS, trnQ, trnfM, trnS, trnI, trnL, terC, yaiI, lysR, dinB, nifU, luxE, tetR, abrB, brnQ, yndE, eamA		phoA	2020-07-24	0.3383268767135487			agricultural soil	157203	France: Limagne, Puy de dme	culture	circular	45528859	2905859	France,Limagne,Puy de dme			Bacilli (91061)	Bacillaceae (186817)	Priestia (2800373)	Priestia megaterium	Bacillales (1385)	Bacillota (1239)	Priestia_megaterium (1404)		Bacteria (2)	-0.7069960999999999	-4742401999999990	GCF_013458535.1	38.2	MOBL	mobilizable	0	1
NZ_CP048890.1	75956	33.5	0	0	0	79	2	21	0	0	0	0	0	0	copG, gntR, lanM, tlpA, arsR, grpB, nfsA, iclR, corA, ftsW, eamA, ytxH		phoB	2020-07-24	0.335431039022592			agricultural soil	75956	France: Limagne, Puy de dme	culture	circular	45528859	2905859	France,Limagne,Puy de dme			Bacilli (91061)	Bacillaceae (186817)	Priestia (2800373)	Priestia megaterium	Bacillales (1385)	Bacillota (1239)	Priestia_megaterium (1404)		Bacteria (2)	-0.6002607	-4708677	GCF_013458535.1	38.2	MOBL	mobilizable	0	1
NZ_CP048891.1	70948	35.1	17	0	4	73	2	29	0	0	0	0	0	0	rrs, rrl, rrf, trnfM, rrf, trnV, trnK, trnL, trnG, trnL, trnR, trnP, trnA, trnM, trnS, trnF, trnW, trnH, trnG, trnI, trnE, fsa, gerA, yxeA, ycaC, pncA, ytcJ, spxA, yoyH		glpQ	2020-07-24	0.3510035518971641			agricultural soil	70948	France: Limagne, Puy de dme	culture	circular	45528859	2905859	France,Limagne,Puy de dme			Bacilli (91061)	Bacillaceae (186817)	Priestia (2800373)	Priestia megaterium	Bacillales (1385)	Bacillota (1239)	Priestia_megaterium (1404)		Bacteria (2)	-0.5895751	-46919045	GCF_013458535.1	38.2	MOBL	mobilizable	0	1
NZ_CP049157.1	1996666	59.7	2	0	3	1848	0	149	0	0	0	0	0	0	mdtA, ttgC, cusR, puuR, pgrR, ncS54, uvrY, yigB, phnT, zraR, yraA, proQ, gntR, metS, natA, exaE, padR, ybgE, mdtN, cyaE, rutC, gltC, ygiN, yddE, abaF, arsR, arsB, pgrR, yajO, ugpE, malK, degA, mdtA, mdtC, mdtB, oprM, brnA, cyaE, gltR, mreB, tetR, proX, ousW, pucR, proX, rhaR, hcnB, nikE, dppB, puuC, lrp, dmlR, ybjG, qseB, hpnJ, hpnI, fimA, hdfR, potA, ydcV, ybjJ, mglA, rbsC, rbsK, lysR, pgrR, dml…	phnT, ugpE, pstS, phnE, phnF, phnU	phoB, ugpC, ugpC, pit, phoB, ugpC, pstS, ugpC, ugpC, phnE, phnC, phoB, phoB, ugpC, phoB, phoX, ugpC, phoB, ugpC, phoB, phoP, phnM, phoB, phoB	2020-03-22	0.5969636383851881			soil	1996666		whole organism	circular						Betaproteobacteria (28216)	Burkholderiaceae (119060)	Caballeronia (1827195)	Caballeronia sp. SBC1	Burkholderiales (80840)	Pseudomonadota (1224)	Caballeronia_sp._SBC1 (2705548)		Bacteria (2)	57139826	-39977794	GCF_011493005.1	59.8	MOBQ	mobilizable	6	24
NZ_CP049158.1	1826371	60.0	2	0	0	1630	0	104	0	1	0	0	0	0	parA, yajO, ygcS, yadV, ampR, iclR, mgtC, epsC, cmpR, proV, choW, araC, proX, cdhR, dadA, fadH2, betA, betB, betI, fdhA, glxA, glyA, fadH, fixB, proX, purU, betC, araC, asmA, czcR, acnA, prpD, prpC, mdh, gntR, sdhC, sdhD, sdhA, sdhB, sdhE, gltA, gspG, gspC, tnpB, gspG, istB, istA, xerD, hicB, hicA, istB, istA, xerD, hicB, hicA, ppk2, leuC, leuB, asd, lysM, truA, trpB, trpA, accD, folC, dedD, purF…	phoU, phoB, ugpC, pstS, phnT, phnY, phnV, phnT, phnS	gdh, purF, pit, ugpC, ugpC, ugpC, phoB, ugpC, pstS, gnl, phnT, pyrE, phoB, phny, phnA, phnU, phnT, phnS, phnW, gnl, gnd, ugpC, ugpC, RegX3	2020-03-22	0.5995829981969709			soil	1826371		whole organism	circular						Betaproteobacteria (28216)	Burkholderiaceae (119060)	Caballeronia (1827195)	Caballeronia sp. SBC1	Burkholderiales (80840)	Pseudomonadota (1224)	Caballeronia_sp._SBC1 (2705548)		Bacteria (2)	592459	-36925058	GCF_011493005.1	59.8	MOBH	mobilizable	9	24
NZ_CP049159.1	734052	58.8	0	0	0	725	0	128	0	0	0	0	0	0	dmlR, ccmA, rbsB, rbsC, istB, bluF, pyp, istA, tnp, tnp, istB, merR, fabG, hemH, sdhB, sdhA, sdhD, sdhC, tfdS, insE, kfrA, secA, cspJ, tnpB, istA, istB, istA, pinR, xerC, xerC, brkB, tnp, mntH, ltrA, asmA, xerC, rhaR, pstS, abaF, pdhA, rbsA, rbsC, zwf, cheW, hmpA, nsrR, nnrS, narH, narJ, narI, surA, narK2, yjiB, istB, istA, nsrR, nnrS, ctaD, secA, zupT, clcB, cysM, czcR, ssuB, ssuC, hdfR, marR, z…	pstS, phoB	pstS, phoB, ugpC, phnA, gdh	2020-03-22	0.5878139423365102			soil	734052		whole organism	circular						Betaproteobacteria (28216)	Burkholderiaceae (119060)	Caballeronia (1827195)	Caballeronia sp. SBC1	Burkholderiales (80840)	Pseudomonadota (1224)	Caballeronia_sp._SBC1 (2705548)		Bacteria (2)	5685415	-38767152	GCF_011493005.1	59.8	MOBQ	mobilizable	2	5
NZ_CP049244.1	1272887	62.0	3	0	3	1111	3	38	0	0	0	0	0	0	dctM, siaP, gntR, tnpB, tnp, parD, istA, istB, nnrU, norB, hemN, nnrS, nirK, fecR, fhuB, ugpC, rpiR, murA, murQ, nikD, gntR, dctP, gntR, dctP, cspC, ugpE, yjfF, ccmA, ytfQ, pilZ, luxR, yqaA, marR, marR, opgC, gntR, vpsF, recQ, dctP, atzF, uca, ycgI, hpxZ, gntR, atzF, marR, ugpC, lacI, tctB, gntR, cysT, cysW, cspC, copD, lysR, ctaD, coxB, lysR, hipA, lysR, tkt, lysR, tnpB, insE, araC, araC, poxB, …	ugpC, ugpE, ugpC, ugpC, ugpB, ugpE, ugpA, ugpE, phnF, phnG, phnH, phnI, phnJ, phnK, phnL, ugpC, phnN, phnE, phnE, phnD, phnC, ugpC, ugpE, ugpA, ugpB, ugpE, ugpE, ugpC	ugpC, ugpC, phoP, phoB, phoB, ugpC, ugpC, ugpC, ugpA, ugpC, phnF, phnI, phnJ, phnK, phnL, phoB, gnl, ugpA, ugpC, phnM, phnE, phnE, phnD, phnC, ugpC, ugpE, ugpC, phoP, ugpC, ugpC, ugpC	2020-03-08	0.6196567330799985			soil	1272887	South Korea	cell culture	circular	365581914	1279408564	South Korea			Alphaproteobacteria (28211)	Rhizobiaceae (82115)	Allorhizobium (78526)	Allorhizobium pseudoryzae	Hyphomicrobiales (356)	Pseudomonadota (1224)	Allorhizobium_pseudoryzae (379684)		Bacteria (2)	6896929300000000	-42927246	GCF_011046245.1	62.4	MOBQ	mobilizable	28	31
NZ_CP049249.1	1207714	57.8	6	0	6	1089	0	40	0	1	0	0	0	0	lysR, lysR, rutF, lysR, catC, catA, pcaD, vapC, ggt, btpA, lysR, tctC, tctB, lysR, xerD, lrp, nikE, yigB, gabD, argE, gntR, pfkB, argH, ugpE, ugpA, lmbE, tctA, tctB, gntR, glcG, dAP2, lysR, dabB, dabA, asnC, lysR, oqxB, kdgR, mnhC, mnhG, araC, yhaN, thiM, recX, ftsK, nikD, ugpB, ugpA, ugpE, lacI, alr, cutC, rpiR, nagA, pntB, deoR, glpD, phnN, phnE, phnE, phnD, phnC, phnL, phnK, phnI, phnH, phnG, …	ugpE, ugpA, ugpB, ugpA, ugpE, phnN, phnE, phnE, phnD, phnC, phnL, phnK, phnI, phnH, phnG, phnF, aepX, ugpE, ugpE, ugpE, ugpB	ugpC, ugpC, ugpA, ugpC, ugpC, ugpA, ugpC, ugpB, ugpA, ugpE, ugpC, ugpC, phnN, phnM, phnE, phnE, phnD, phnC, phnL, phnK, phnJ, phnI, pit, ugpC, ugpC, phoP, gdh, ugpC, ugpC, ugpC, ugpC, phoB, ugpC, phoB, gnl	2020-03-08	0.577935670200064			soil	1207714	South Korea	cell culture	circular	365581914	1279408564	South Korea			Alphaproteobacteria (28211)	Rhizobiaceae (82115)	Rhizobium (379)	Rhizobium rhizoryzae	Hyphomicrobiales (356)	Pseudomonadota (1224)	Rhizobium_rhizoryzae (451876)		Bacteria (2)	68937807	-4264593	GCF_011046895.1	58.2	MOBQ	mobilizable	21	35
NZ_CP049251.1	169154	57.2	0	0	0	165	0	23	0	0	0	0	0	0	lacI, ugpE, ugpC, marR, groL, groES, xerD, nac, pxpB, tniQ, yncE, uspA, crcB, yndB, arsR, ybjD, virB3, virB4, virB8, virB9, virB11, traG, traA, copG, repC, ctRNA_p42d, repB, repA, vbhA, repC, psiB	ugpE, ugpC	ugpC	2020-03-08	0.572105891672677			soil	169154	South Korea	cell culture	circular	365581914	1279408564	South Korea			Alphaproteobacteria (28211)	Rhizobiaceae (82115)	Rhizobium (379)	Rhizobium rhizoryzae	Hyphomicrobiales (356)	Pseudomonadota (1224)	Rhizobium_rhizoryzae (451876)		Bacteria (2)	66331816	-4790185500000000	GCF_011046895.1	58.2	MOBQ	mobilizable	2	1
NZ_CP049317.1	1990521	59.7	2	0	3	1840	0	150	0	0	0	0	0	0	anoR, hcaR, bpoC, fabG, fabG, kdpC, dmlR, uspA, uvrY, acs, atpD, atpR, atpE, mntH, cbpM, ydiK, aaeB, dmlR, dmlR, iclR, norG, ydeP, cynR, tam, rutD, marR, novR, lutR, gntR, prpR, prpB, prpC, acnD, prpF, tra8, cspD, abaF, lysR, slyX, copG, livF, lptB, nicR, nicT, nicR, gabR, gabT, gabD, mazF, yjcS, occR, dppB, ddpC, oppD, btuD, livF, livM, livH, lptB, sfnG, sfnC, dmlR, gstB, araC, ggt, gntR, parE, …	phnU, phnF, phnE, pstS, ugpE, phnT	phnM, phoP, phoB, ugpC, phoB, ugpC, phoX, phoB, ugpC, phoB, phoB, phnC, phnE, ugpC, ugpC, pstS, ugpC, phoB, pit, ugpC, ugpC, phoB, phoB, phoB	2020-03-08	0.5969517528325499			soil	1990521		whole organism	circular						Betaproteobacteria (28216)	Burkholderiaceae (119060)	Caballeronia (1827195)	Caballeronia sp. SBC2	Burkholderiales (80840)	Pseudomonadota (1224)	Caballeronia_sp._SBC2 (2705547)		Bacteria (2)	579443	-37542808	GCF_011039955.1	59.8	MOBH	mobilizable	6	24
NZ_CP049319.1	794780	58.0	0	0	0	840	6	234	0	0	0	0	0	0	virD4, virB11, trbG, virB8, virB6, virB3, trbM, mobD, mnmH, tnpB, tniQ, mcpP, hmpA, coxB, ctaD, doxX, nreC, tal, tkt, mntH, acs, zupT, hdfR, ssuC, ssuB, czcR, clcB, zupT, secA, ctaD, nnrS, nsrR, yjiB, narK2, surA, narI, narJ, narH, nnrS, nsrR, hmpA, cheW, zwf, rbsC, rbsA, pdhA, abaF, tnpB, doxX, arsN2, arsH, phoB, phoU, pstB, pstB, pstA, pstC, pstS, arsC, arsB, pstS, glrR, phnD1, istA, istB, moaA…	phoB, phoU, pstB, pstB, pstA, pstC, pstS, pstS, pstS	phoU, pstB, pstB, pstA, pstC, pstS, pstS, pstS, gdh	2020-03-08	0.5802297491129621			soil	794780		whole organism	circular						Betaproteobacteria (28216)	Burkholderiaceae (119060)	Caballeronia (1827195)	Caballeronia sp. SBC2	Burkholderiales (80840)	Pseudomonadota (1224)	Caballeronia_sp._SBC2 (2705547)		Bacteria (2)	56646485	-36436002	GCF_011039955.1	59.8	MOBQ	mobilizable	9	9
NZ_CP049320.1	377315	59.1	0	0	0	352	0	45	0	0	0	0	0	0	ppiC, tetR, arcB, treS, lprI, ompC, dctQ, dctP, garD, kdgD, uhpC, fadR, gspG, parA, speB, lysR, bcsF, ccdB, ccdA, phoB, benM, catA, benA, benB, benC, benD, cpaB, artP, yecS, glnM, potA, potC, potD, aruI, btuD, rutB, fliM, cheA, phnA, emrB, marR, arpC, emrA, fabG, hxlR, wcaG, hxlR, rhaS, hdeA, doxX, yfdX, fabI, xerD, clcB, adhP, adhA, lutR, iclR, linX, oxdD, xynR, naiP, xerC, istA, istB, tniQ, pqq…	phoB	ugpC, phnA, gdh, phoB	2020-03-08	0.5913467527132502			soil	377315		whole organism	circular						Betaproteobacteria (28216)	Burkholderiaceae (119060)	Caballeronia (1827195)	Caballeronia sp. SBC2	Burkholderiales (80840)	Pseudomonadota (1224)	Caballeronia_sp._SBC2 (2705547)		Bacteria (2)	56942525	-36528697	GCF_011039955.1	59.8	MOBQ	mobilizable	1	4
NZ_CP049321.1	195179	57.0	1	0	0	210	1	94	0	0	0	0	0	0	istB, parA, klcA, imuA, fecR, tnpB, repA, stdB, traO, virD4, virB11, virB5, virB3, trbM, pxpA, doxX, istA, istB, yhcG, parB, trnI, kup, kdpF, kdpA, kdpB, kdpC, istA, istB, istB		phoB	2020-03-08	0.570281638905825			soil	195179		whole organism	circular						Betaproteobacteria (28216)	Burkholderiaceae (119060)	Caballeronia (1827195)	Caballeronia sp. SBC2	Burkholderiales (80840)	Pseudomonadota (1224)	Caballeronia_sp._SBC2 (2705547)		Bacteria (2)	55920377	-3602293	GCF_011039955.1	59.8	MOBQ	mobilizable	0	1
NZ_CP049358.1	323544	66.5	1	0	0	271	0	16	0	0	0	0	0	0	soxR, qor, marR, ddpA, hmpA, iscR, cobT, cobS, coxL, coxL, hpaF, hpaG, msrP, hpaD, hpaB, hpaE, pucR, opuBB, opuBA, osmF, tnpB, murQ, gntR, dppB, dppC, tnp, caiA, paaI, maoC, fabG, nadE, yliI, cheY, pepF, rimO, uvrA, marR, pdxY, nCS2, modB, modA, thiD, thiG, thiS, thiC, ecfT, xerD, trxC, phoU, pstB, pstA, pstC, pstS, frmR, xerD, dedA, iclR, hutU, speB, hutI, hutH, paaB, brxL, pglZ, pglX, brxC, hpa…	phoU, pstB, pstA, pstC, pstS	phoX, pstB, pstA, pstC, pstS, nrdF, nrdE, prsA	2020-03-08	0.6652572756719334			soil	323544	China: Xinjiang	cell culture	circular	41.5	85.5	China,Xinjiang			Deinococci (188787)	Deinococcaceae (183710)	Deinococcus (1298)	Deinococcus wulumuqiensis R12	Deinococcales (118964)	Deinococcota (1297)	Deinococcus_wulumuqiensis (980427)	Deinococcus_wulumuqiensis_R12 (1288484)	Bacteria (2)	74780006	-3.3484e+16	GCF_011067105.1	66.6	non-mob	non-mob	5	8
NZ_CP049359.1	222570	61.1	0	0	0	222	2	50	0	0	0	0	0	0	pxpB, adhE, cobA, cbiX, cysI, cysC, cysH, sat, bioB, bioD, tnpB, bioA, tnp, lspA, cadA, arsR, tnp, relE, hdeD, copG, parA, copZ, tlpA, tnp, tnp, cueP, tnp, insO, xamI, tnp, merR, parA, tnp, galE, epsG, glf, tnp, tlpA, ptsP, pfkB, gntR, tnpB, arsB, tnp, tnp, wrbA, marR, tnpB, tnp		phoB, ptsI	2020-03-08	0.6108999415914095			soil	222570	China: Xinjiang	cell culture	circular	41.5	85.5	China,Xinjiang			Deinococci (188787)	Deinococcaceae (183710)	Deinococcus (1298)	Deinococcus wulumuqiensis R12	Deinococcales (118964)	Deinococcota (1297)	Deinococcus_wulumuqiensis (980427)	Deinococcus_wulumuqiensis_R12 (1288484)	Bacteria (2)	7770231	-32129986	GCF_011067105.1	66.6	non-mob	non-mob	0	2
NZ_CP050179.1	327914	66.6	0	0	0	348	0	115	0	0	0	0	0	0	blaI, lpqS, grpE, tnp, pilZ, whiB, moxR, ftsK, espG, vbhA, maoC, maoC, uspA, luxR, tnp, copG, arsR, tnp, parA, tetR, maoC, spoIVCA, ctaD, dsbA, copC, lnt, ccsB, resB, resC, copY, arsR, cadA, lspA, arsA, arsD, arsR, arsB, merR, arsR, istA, istB, copA, cadA, uspA, eamA, gnd, lgt, luxR		phoP, gnd	2021-07-04	0.6657751727587111			Soil sample from China, Shenyang	327914	China:Shenyang	bacterial pure culture	circular	416749893	123458674	China,Shenyang			Actinomycetes (1760)	Nocardiaceae (85025)	Rhodococcus (1827)	Rhodococcus pyridinivorans	Mycobacteriales (85007)	Actinomycetota (201174)	Rhodococcus_pyridinivorans (103816)		Bacteria (2)	7085967500000000	-2339248	GCF_019095205.1	68.0	non-mob	non-mob	0	2
NZ_CP051517.1	142975	59.5	0	0	0	152	0	20	0	0	0	0	0	0	traD, iclR, lysR, gtdA, marR, emrB, marR, arpC, emrA, lysR, marR, fdhA, lysR, gtdA, maiA, gorA, yciI, lysR, lysR, virD4, virB11, virB9, virB9, trbL, virB5, pnuC, trbE, fkbM, copG, parB, xerD, dcm, dnaE, imuB, imuA, arsN2, arsH, arsR, arsR, phoB, phoU, pstB, pstA, pstC, pstS, arsB, glrR, phnD, moaA, arsC, arsO, klcA	phoB, phoU, pstB, pstA, pstC, pstS, phnD	gdh, phoB, phoU, pstB, pstA, pstC, pstS	2020-04-24	0.5948312642070293			Alpine forest soil	142975	Italy: 7 km north of Bozen/Bolzano below the Rittner Horn, South Tyrol	clean bacterial culture	not-set	4671667	11.5	Italy,7 km north of Bozen/Bolzano below the Rittner Horn,South Tyrol			Betaproteobacteria (28216)	Burkholderiaceae (119060)	Paraburkholderia (1822464)	Paraburkholderia aromaticivorans	Burkholderiales (80840)	Pseudomonadota (1224)	Paraburkholderia_aromaticivorans (2026199)		Bacteria (2)	5496512999999990	-34151783	GCF_012689525.1	62.5	MOBQ	mobilizable	7	7
NZ_CP052772.1	385351	70.7	0	0	0	398	2	91	0	0	0	0	0	0	ccsB, ftsP, blaI, efpA, copZ, csoR, nuoK, istB, ccmB, ccmF, ctaD, cadA, czcD, lnt, alpA, whiE, whiE, marR, rfbA, accD, vbhA, acrR, yciI, acrR, paaI, lysR, paaI, accD, ASpks, fdxA, copG, marR, irrE, parB, whiB, Hammerhead_II, dprA, mobF, xerC, xerD, arsO, arsC, arsB, pstC, pstA, pstB, dsbE, phoP, murJ, rimI, lnt, moeZ, tetR, dsbE	pstC, pstA, pstB, phoP	phoX, pstB	2023-05-02	0.7065065356000114			soil	385351	China: the Shahu Park in Wuhan	Cell culture	circular	3056509845	1.14334e+16	China,Wuhan,Shahu Park			Actinomycetes (1760)	Pseudonocardiaceae (2070)	Pseudonocardia (1847)	Pseudonocardia alni	Pseudonocardiales (85010)	Actinomycetota (201174)	Pseudonocardia_alni (33907)		Bacteria (2)	6968975	-2829859	GCF_045159825.1	74.3	non-mob	non-mob	4	2
NZ_CP053546.1	224889	61.7	0	0	0	216	3	34	0	0	0	0	0	0	hicA, ppk2, asnC, lysR, folD, fadR, adhE, betA, aRA1, thsB, thsB, istA, istB, marR, parA, trbC, traM, asnC, xerD, yozG, gntR, pntB, iclR, gntR, lacI, hydA, ald, pucR, fadR, pxpA, pxpA, fadR, pxpA, pdxS, istB, istA, istB, istA, gcvP, gcvT, gcvH, glyA, pdxS, aspB, lysR, ridA, lysR, gntR, ridA, mobC, parB, istA, istB, dprA		phoD	2020-10-30	0.61696659240781			soil	224889	China	cell culture	linear	344118455	860326902	China			Actinomycetes (1760)	Micrococcaceae (1268)	Paenarthrobacter (1742992)	Paenarthrobacter sp. YJN-5	Micrococcales (85006)	Actinomycetota (201174)	Paenarthrobacter_sp._YJN-5 (2735316)		Bacteria (2)	6556516	-26172116	GCF_015040095.1	63.5	non-mob	non-mob	0	1
NZ_CP053657.2	500306	32.9	1	0	0	400	8	45	0	2	0	0	0	0	thsA, mafB, dcm, hfq, rimL, adcA, tnp, solG, dltA, solG, hpyO, yxeA, tnpA, eda, kduI, kduD, galM, galK, galT, xerS, ydiL, rimI, norM, colA, araJ, acrR, arsR, sdaC, sdaAA, sdaAB, cDA1, qdoI, lytD, eamA, gntR, tnp, tnpB, rimI, acrR, ampS, tetR, bceA, grsT, sfp, solG, dltA, hfq, arsR, tnpB, tnp, sdpA, ampC, herA, prgI, recU, recU, gspF, gspF, cpaB, traM, traG, tnp, tnpB, rsfA, yxeA, trnI, bla, cxxC,…		phoP	2020-05-28	0.3285669170467674			soil	500306	Namibia	culture	circular	-232335499	1.73231e+16	Namibia			Bacilli (91061)	Bacillaceae (186817)	Bacillus (1386)	Bacillus cereus	Bacillales (1385)	Bacillota (1239)	Bacillus_cereus (1396)		Bacteria (2)	-2.38564e+16	-4596522	GCF_013177495.2	35.5	MOBL	mobilizable	0	1
NZ_CP054208.1	523504	61.1	0	0	0	551	8	120	0	0	0	0	0	0	istB, maoC, iclR, fabG, maoC, nhaA, uvrA, fdhA, araC, glxA, ygiN, tnp, lysR, mcrC, merR, istB, maoC, tnp, limB, limC, mmdA, nhaA, ehuB, ehuC, ehuD, ehuA, tetR, cdiI, iclR, arsA, arsD, trxB, htpX, arsB, merR, arsR, cadA, lspA, csoR, tnp, istB, resB, lnt, copC, cadA, cadA, ccsB, resB, ccdA, tlpA, tlpA, lnt, arsR, phoU, ccsB, mgtE, tlpA, resB, copC, ctaD, lspA, mazF3, flgM, copG, yncE, yncE, ridA, c…	phoU	phoP, phoU	2021-04-10	0.6107040251841438			carbendazim contaminated soil	523504	China: Cixi city,Zhejiang province	cell culture	linear	302376243	1211962743	China,Cixi city,Zhejiang province			Actinomycetes (1760)	Nocardiaceae (85025)	Rhodococcus (1827)	Rhodococcus qingshengii	Mycobacteriales (85007)	Actinomycetota (201174)	Rhodococcus_qingshengii (334542)		Bacteria (2)	72354026	-24564724	GCF_017795725.1	62.5	non-mob	non-mob	1	2
NZ_CP054609.1	508678	50.7	4	0	0	477	1	57	0	1	0	0	0	0	ftsZ, dnaC, gtrA, tylF, ubiE, rfbG, rfbF, tyrS, cysK, padR, recG, degV, dhaL, rpmB, spoVM, rpe, rsgA, pknB, rlmN, rsmB, fmt, def, priA, coaBC, rpoZ, gmk, remA, dapF, rqcH, lysR, ylbG, ftsW, yloU, cax, araC, araC, tetR, tetR, lacI, ubiE, rpsD, yidC, trkH, acsA, acuA, acuC, ccpA, vanZ, pfpI, aroA, gndA, luxR, tetR, ubiE, trnV, trnV, htpX, trnL, trnI, pyrE, pyrF, carB, carA, pyrC, pyrR, lspA, ileS, …		ugpC, gmk, ptsH, ptsI, gnd, pyrE, pyrF, phoH, ugpE, phoA	2020-06-18	0.5073720506882546			soil	508678	South Korea	cell culture	circular	365581914	1279408564	South Korea			Bacilli (91061)	Paenibacillaceae (186822)	Paenibacillus (44249)	Paenibacillus cellulosilyticus	Bacillales (1385)	Bacillota (1239)	Paenibacillus_cellulosilyticus (375489)		Bacteria (2)	11180096	-2.8864e+16	GCF_013347265.1	50.3	MOBQ	mobilizable	0	10
NZ_CP054613.1	2697188	50.6	74	0	25	2373	0	203	0	0	0	0	0	0	aspS, hisS, dtd, recJ, secF, secD, spoVB, yajC, tgt, queA, ruvB, ruvA, ruvC, pheA, thrB, obgE, rpmA, rplU, rodA, minD, minC, mreD, mreC, mreB, radC, murC, valS, fliT, hemL, hemB, hemC, hemX, hemA, yihA, lon, lonB, ispG, clpX, clpP, tig, trnR, sbnA, asnB, rph, marR, lacI, rbsK, fni, recQ, mdh, icd, citZ, ppk1, ytvI, fxsA, pyk, accD, ytrH, ytrI, fabF, yhaL, odhB, gerA, clcA, ompR, tcpC, abrB, tadB,…	phoP, phoP	spoT, ppk, pyk, phoP, phoB, phoB, ugpC, ndk, phnM, ugpC, pyk, phoP, ppc, adk, phoP, phoB, phoP, purA, tmk, guaB	2020-06-18	0.5056240054456715			soil	2697188	South Korea	cell culture	circular	365581914	1279408564	South Korea			Bacilli (91061)	Paenibacillaceae (186822)	Paenibacillus (44249)	Paenibacillus cellulosilyticus	Bacillales (1385)	Bacillota (1239)	Paenibacillus_cellulosilyticus (375489)		Bacteria (2)	5454141	-42915606	GCF_013347265.1	50.3	MOBQ	mobilizable	2	20
NZ_CP054615.1	318077	67.7	0	0	0	249	4	25	0	0	0	0	0	0	rfbA, rfbD, rfbB, rfbC, cysD, cysN, mtnP, mtnA, flgM, infC, copG, aqpZ, copG, fkbM, asnB, fkbM, rfbF, rfbG, rfbH, gmd, gmd, fkbM, wbaP, fkbM, jmjC, pqqD, pglD, tnpB, pemK, mazE, lysM, yigZ, pseC, pseB, cpsB, yfhO, galE		phoX	2020-06-17	0.6767795219396561			soil	318077	South Korea	cell culture	circular	365581914	1279408564	South Korea			Alphaproteobacteria (28211)	Azospirillaceae (2829815)	Azospirillum (191)	Azospirillum oryzae	Rhodospirillales (204441)	Pseudomonadota (1224)	Azospirillum_oryzae (286727)		Bacteria (2)	70569315	-36472082	GCF_013347285.1	67.5	non-mob	non-mob	0	1
NZ_CP054616.1	668146	67.9	5	0	6	529	0	22	0	1	0	0	0	0	merR, arr, asmA, eamA, gabT, potA, glgX, lysR, hutU, hutC, hutI, hutF, hutH, hutG, pxpB, lptF, flaF, nadE, bcsA, bcsN, lysR, dsbA, eamA, ompA, lysR, clpB, pabB, icmH, tssM, impM, lysR, wrbA, hemF, petA, cheY, mmdA, accC, scpA, cydB, xdhA, xdhB, xdhC, atpE, atpB, atpD, motA, arsR, dxs, yqxC, mmsA, lysR, lysR, nikE, yigB, gabD, argE, rarD, sulP, asmA, msrQ, msrP, purT, pqqE, pqqD, pqqC, pqqB, pqqA,…	phoU	purT, phoU, purA	2020-06-17	0.6787723042568541			soil	668146	South Korea	cell culture	circular	365581914	1279408564	South Korea			Alphaproteobacteria (28211)	Azospirillaceae (2829815)	Azospirillum (191)	Azospirillum oryzae	Rhodospirillales (204441)	Pseudomonadota (1224)	Azospirillum_oryzae (286727)		Bacteria (2)	7102722	-3613979	GCF_013347285.1	67.5	non-mob	non-mob	1	3
NZ_CP054617.1	728493	67.5	6	0	0	642	2	65	0	0	0	0	0	0	uxaC, gntR, kduD, kduI, mgsA, gntR, paaK, pcaF, paaI, paaH, paaG, paaN, paaK, paaD, paaC, paaB, paaA, aceA, dapB, znuA, znuC, znuB, ftsK, glnK, ubiH, lolA, hdeD, araC, lysE, lysA, argH, tenA, hppD, yncE, higA, tnpB, tnp, tnpB, marR, tnsE, tniQ, fabG, trnD, trnN, lhpI, folB, rpoH, livH, cbtB, cbtA, cobW, cobN, cobG, cobH, cobJ, cobK, cbiE, cobM, cobA, bluB, cheA, cheR, cheW, cheC, hisG, hisD, wzb,…		purC, gntK, pyk, pit	2020-06-17	0.6754230994669819			soil	728493	South Korea	cell culture	circular	365581914	1279408564	South Korea			Alphaproteobacteria (28211)	Azospirillaceae (2829815)	Azospirillum (191)	Azospirillum oryzae	Rhodospirillales (204441)	Pseudomonadota (1224)	Azospirillum_oryzae (286727)		Bacteria (2)	70175405	-3.59622e+16	GCF_013347285.1	67.5	non-mob	non-mob	0	4
NZ_CP054620.1	443879	67.8	8	0	3	369	0	12	0	0	0	0	0	0	gltA, eda, hmpA, norR, uxuA, gntR, ppc, ygiQ, pstB, pstA, pstC, pstS, gloB, pilN, gntR, flgD, luxR, livH, trnY, ccoG, merR, glpK, glpD, deoR, guaC, uvrC, trkA, tonB, trkA, nirD, saoA, trnV, trnG, trnD, trnA, trnL, yjfF, ytfR, ytfQ, omaA, yvrE, chvE, mmsA, mmsB, ilvD, cstA, fabG, btsR, lysR, parB, lysR, soxR, lacI, vapC, tetR, adeA, adeB, rrs, trnI, trnA, rrl, rrf, flgN, flgI, flgK, flgE, motA, fl…	pstB, pstA, pstC, pstS	ppc, pstB, pstA, pstC, pstS, gcd	2020-06-17	0.6779640397495714			soil	443879	South Korea	cell culture	circular	365581914	1279408564	South Korea			Alphaproteobacteria (28211)	Azospirillaceae (2829815)	Azospirillum (191)	Azospirillum oryzae	Rhodospirillales (204441)	Pseudomonadota (1224)	Azospirillum_oryzae (286727)		Bacteria (2)	6999298	-35624478	GCF_013347285.1	67.5	non-mob	non-mob	4	6
NZ_CP054621.1	1118090	67.3	14	0	8	925	3	66	0	0	0	0	0	0	pilW, pilF, pta, treZ, treY, flbD, livF, flgE, flgK, dctP, flgG, pilW, pseI, marR, gpmA, asnB, nadE, rrl, rrs, cysA, cysW, cysT, galE, marR, qseC, pncA, asnB, ngg, cheW, cheW, fliF, fliH, fliN, motA, flhA, flhF, pyk, trnR, ugpC, yagS, groES, groL, arsB, adhE, lysR, sleB, gsiC, gsiB, oppF, fliG, dctQ, pxpB, glmU, glmS, ftsH, ppsA, uspA, acsA, pdhA, tnp, sunT, dotU, lys2b, ubiX, gntR, nikD, pxpA, a…	ugpC	phoB, pyk, ugpC, pps, gnl, purQ, pyk, ppdK, phnL, phoB	2020-06-17	0.6730773014694703			soil	1118090	South Korea	cell culture	circular	365581914	1279408564	South Korea			Alphaproteobacteria (28211)	Azospirillaceae (2829815)	Azospirillum (191)	Azospirillum oryzae	Rhodospirillales (204441)	Pseudomonadota (1224)	Azospirillum_oryzae (286727)		Bacteria (2)	7092263000000000	-3.59984e+16	GCF_013347285.1	67.5	non-mob	non-mob	1	10
NZ_CP054622.1	305146	62.8	0	0	0	330	1	107	0	0	0	0	0	0	wcaL, mmsB, mmsA, chvE, iolG, ltrA, lysR, pcaF, ltrA, tniQ, tnp, tnpB, coiA, mobH, tnp, spoIVCA, traL, traK, traB, traV, traA, traC, trbC, traU, traN, bet, yqaJ, cobS, traF, traH, traG, flhD, lysR, istB, copG, mobI, istB, istA, tnpB, vapC, tnpB, tnp, ybjN, tniB, tniQ, feoA, dedA, eamA, dmeF, dedA, copA, ompR, tolC		phoP	2020-06-17	0.6281058902951374			soil	305146	South Korea	cell culture	circular	365581914	1279408564	South Korea			Alphaproteobacteria (28211)	Azospirillaceae (2829815)	Azospirillum (191)	Azospirillum oryzae	Rhodospirillales (204441)	Pseudomonadota (1224)	Azospirillum_oryzae (286727)		Bacteria (2)	69064245	-36902924	GCF_013347285.1	67.5	MOBQ	mobilizable	0	1
NZ_CP055284.1	161809	39.0	0	0	0	198	1	11	0	0	0	0	1	0	tnp, tnp, tnpB, tnp, tnp, tnp, tnp, tnp, higB, tnp, hicB, hipA, tnp, tnp, tnp, tnp, tnp, hicA, hicB, ltrA, tnp, tnp, tnp, tnp, eptA, qseB, tnp, tnp, tnp, tnpB, tnp, tnp, ompR, cadA, copC, copZ, czcC, czcA, tnp, tnp, tnp, tnp, tnp, brnT, hicA, hicB, sulP, brnT, nadS, tnp, tnp, tnp, tnp, vapC, cynS, tnp, tnp, tnp, tnp, tnp, czcA, czcC, ompR, qseC, tnp, tnp, tnp, ltrA		phoB, phoB, phoB	2020-06-27	0.389613680326805			soil	161809	USA:Massachusetts	pure culture	circular	423788774	-7203236600000000	USA,Massachusetts			Gammaproteobacteria (1236)	Moraxellaceae (468)	Acinetobacter (469)	Acinetobacter sp. NEB 394	Moraxellales (2887326)	Pseudomonadota (1224)	Acinetobacter_sp._NEB_394 (2743575)		Bacteria (2)	0.9918139	-8287362	GCF_013374795.1	41.3	non-mob	non-mob	0	3
NZ_CP055285.1	85229	39.4	0	0	0	80	0	8	0	0	0	0	0	0	tetR, tnp, tnp, tnp, yqaJ, tnp, tnp, tnp, mutS, tnp, tnpB, hipA, tnp, tnp, hicB, hicA, ppk1, tnp, tnp, tnpB, brxL, pglZ, pglX, brxC, tnp, tnp, tnp, tnp, tnp, tnp, tnp, rbbA		ppk	2020-06-27	0.3942554764223445			soil	85229	USA:Massachusetts	pure culture	circular	423788774	-7203236600000000	USA,Massachusetts			Gammaproteobacteria (1236)	Moraxellaceae (468)	Acinetobacter (469)	Acinetobacter sp. NEB 394	Moraxellales (2887326)	Pseudomonadota (1224)	Acinetobacter_sp._NEB_394 (2743575)		Bacteria (2)	0.8537758	-8307196000000000	GCF_013374795.1	41.3	non-mob	non-mob	0	1
NZ_CP058351.1	708533	58.4	2	0	0	664	8	70	0	0	0	0	0	0	ugpC, gntR, nagA, nikD, atoA, tctB, dppB, uxuA, gntR, patD, lysR, denD, ubiH, scpB, repC, ctRNA_p42d, repB, repA, recQ, ar14, otnI, pemK, kdgR, atzF, uca, ycgI, rraA, araD, gntR, tetR, dppB, vapC, vapB, yitT, gntR, kduD, lacI, rpiR, yiaG, copG, cerR, lysR, araC, trnQ, devC, devA, tnp, ctaD, yiaG, ftsK, hipA, kdgD, tolC, hlyD, ribD, ribA, fkbM, pobA, marR, eamA, wbqC, tnpB, tnpB, tnpB, yecA, tnpB,…	ugpC, ugpC, ugpE, phnE, phnF	ugpC, ugpC, phnC, phoP	2020-06-30	0.5844399625705508			Saline Desert Soil	708533	India: Kutch, Gujarat	Pure culture	linear	23.59	694445				Alphaproteobacteria (28211)	Rhizobiaceae (82115)	Peteryoungia (2853332)	Peteryoungia desertarenae	Hyphomicrobiales (356)	Pseudomonadota (1224)	Peteryoungia_desertarenae (1813451)		Bacteria (2)	6860809	-42626996	GCF_005860795.2	58.7	MOBQ	mobilizable	5	4
NZ_CP058639.1	926330	65.0	2	1	0	907	6	189	0	0	0	0	0	0	tctB, tctA, iclR, mlaF, lprN, ydbM, ntaB, malT, tetR, betI, pknK, ebrB, ebrB, parG, acoR, cofC, cofH, prs, lacI, gnd, glpX, fgd, tkt, tal, vbhA, yjeE, nhaD, trnP, tnp, tetR, whiB, arsR, katE, yciI, yurZ, acnA, yeaO, hflC, marR, gltB2, nirB, tal, arsR, doxX, folE, arsR, fdxA, ctaD, arsR, marR, cynT, arsR, phoU, ethD, mxaD, gntR, ssrA, fabG, tetR, porA, luxR, attH, thuA, marR, marR, phoU, fdxA, urt…	phoU, phoU, phoU	prsA, pckG, phoU, ppdK, phoU, phoU	2021-04-03	0.6503665000593741			soil	926330	China:Shanghai	cell culture	linear	312253441	1214888922	China,Shanghai			Actinomycetes (1760)	Nocardiaceae (85025)	Rhodococcus (1827)	Rhodococcus sp. ZPP	Mycobacteriales (85007)	Actinomycetota (201174)	Rhodococcus_sp._ZPP (2749906)		Bacteria (2)	7.02271e+16	-24788573	GCF_017656075.1	65.7	non-mob	non-mob	3	6
NZ_CP058641.1	262583	65.7	0	0	0	288	4	77	0	0	0	0	0	0	thiF, terD, araC, ltrA, xerC, yozG, phnA, ctaD, istA, istB, nuoB, arsR, csa3, gspF, groL, betB, ethD, orfA, arsR, Ms_IGR-7, Ms_IGR-7, ltrA, istA, parB, copG, flgM, parA, ligA, irrE, tnsA, parA, vbhA, copG, terD, merR, ybaR, crcB, crcB, uspA, araJ, arsR, tauE, frmR, ydfJ, ompR, copG		phoB, pckG, phoB	2021-04-03	0.6572321894410529			soil	262583	China:Shanghai	cell culture	linear	312253441	1214888922	China,Shanghai			Actinomycetes (1760)	Nocardiaceae (85025)	Rhodococcus (1827)	Rhodococcus sp. ZPP	Mycobacteriales (85007)	Actinomycetota (201174)	Rhodococcus_sp._ZPP (2749906)		Bacteria (2)	69934974	-24950345	GCF_017656075.1	65.7	non-mob	non-mob	0	3
NZ_CP058643.1	112887	65.8	0	0	0	132	1	63	0	0	0	0	0	0	nrdH, vbhA, mobF, virB4, tolA, chrA, chrB1, chrB, chrB, copG, xerD, copG, dnaJ, dnaK, merR, ibpA, merR		phoB	2021-04-03	0.6576487992417196			soil	112887	China:Shanghai	cell culture	circular	312253441	1214888922	China,Shanghai			Actinomycetes (1760)	Nocardiaceae (85025)	Rhodococcus (1827)	Rhodococcus sp. ZPP	Mycobacteriales (85007)	Actinomycetota (201174)	Rhodococcus_sp._ZPP (2749906)		Bacteria (2)	7009052799999990	-24333875	GCF_017656075.1	65.7	non-mob	non-mob	0	1
NZ_CP059450.1	2048375	68.1	24	0	8	1825	7	224	0	0	0	0	0	0	livG, livK, livH, livM, acs, fabG, gstA, flbD, ompR, treY, treZ, trnA, trnL, citA, marR, ycbB, dacC, afuA, fbpB, malK, ySH1, nhaP, lysR, frmA, fghA, imp, dgcN, mutT, acrB, acrA, yciW, araC, dadA, mcrA, baeS, ompR, cspC, marR, ilvE, uvrB, araJ, ompR, holC, pepB, lptG, surA, pdxA, mHYT, mltE, menH, gmk, yicC, yqjQ, exoD, uup, ndk, tetR, purN, purM, pgsA, perM, dnaA, fabG, sixA, ppk1, gppA, rnd, asp…	ugpE, ugpA, ugpB, ugpB	phoB, gmk, ndk, purN, purM, ppk, guaB, guaA, phoB, ugpC, gnd, gntK, dcd, ugpC, spoT, pyk, phoB, guaA, phoP, purC, pit	2022-02-10	0.6810144626838347			soil	2048375	China	Prokaryotes	circular	344118455	860326902	China			Alphaproteobacteria (28211)	Azospirillaceae (2829815)	Azospirillum (191)	Azospirillum brasilense	Rhodospirillales (204441)	Pseudomonadota (1224)	Azospirillum_brasilense (192)		Bacteria (2)	7118952799999990	-3532829	GCF_022023855.1	68.4	non-mob	non-mob	4	21
NZ_CP059451.1	863243	67.7	0	0	0	783	10	78	0	0	0	0	0	0	chrB, iclR, rbbA, xylA, xylB, lysR, gntR, glxA, gntR, leuC, leuD, tbuX, eutC, pilF, pdxA, merR, gntR, katG, pqiC, mlaD, terC, lacI, lysR, ethD, yqjQ, menH, gloA, acrR, hipB, yesE, zntA, ytxH, torA, arsR, arsN2, arsB, arsH, tnp, menH, dsrE, lysR, fkbM, macB, lysR, dapA, rpsU, ligK, glxA, cbiM, nthA, nthB, mmsB, nirK, lysR, hlyD, dsbA, lysR, nmrA, glxA, araC, hmpA, yciW, ybjT, tolBN, patZN, frc, tn…		ugpC, pps, ugpC	2022-02-10	0.6769333779712086			soil	863243	China	Prokaryotes	circular	344118455	860326902	China			Alphaproteobacteria (28211)	Azospirillaceae (2829815)	Azospirillum (191)	Azospirillum brasilense	Rhodospirillales (204441)	Pseudomonadota (1224)	Azospirillum_brasilense (192)		Bacteria (2)	7066438000000000	-36672008	GCF_022023855.1	68.4	non-mob	non-mob	0	3
NZ_CP059452.1	753426	68.6	7	0	6	607	2	42	0	2	0	0	0	0	lysR, gntR, dctP, dctM, dctQ, mutK, yiaG, rnaY, ccmA, yadH, gatA, gatA, pncA, ddpA, dppB, dppC, dppD, gsiA, pncA, abrB, gntR, kdpA, kdpB, kdpC, kdpD, ompR, terC, acyC, crp, yceI, nfnB, fixJ, betA, tolC, acrB, acrB, aspB, aCH1, tar, menE, potC, potA, potD, caiD, iclR, rrs, trnI, trnA, rrl, rrf, trnfM, atoC, aspD, aspT, afuA, fbpB, potA, gph, phoE, argE, speB, ridA, nikE, dppC, dppB, ddpA, prpD, ly…	gcd, ugpB, ugpA, ugpE, ugpA, ugpE, ugpB	ugpC, ptsI, ptsH, ptsH, phoB, pckG, ugpC, ugpC	2022-02-10	0.6856811418772382			soil	753426	China	Prokaryotes	circular	344118455	860326902	China			Alphaproteobacteria (28211)	Azospirillaceae (2829815)	Azospirillum (191)	Azospirillum brasilense	Rhodospirillales (204441)	Pseudomonadota (1224)	Azospirillum_brasilense (192)		Bacteria (2)	7017884	-37132533	GCF_022023855.1	68.4	non-mob	non-mob	7	8
NZ_CP059453.1	642990	69.0	15	0	9	552	1	32	0	0	0	0	0	0	pncA, yjbI, nupN, fabG, argE, dppD, dppD, dppC, dppB, ddpA, adhE, lipB, trnL, spoIIAA, mgtE, thiO, thiS, thiG, paaI, ridA, ompR, nahD, ccoG, aRO8, ppc, yvrE, fbaA, ccoG, crp, ompR, pAS, pfkB, frwB, tPR, fecR, cysE, lysR, potD, potA, potB, potC, speB, pbuX, acyP, coxB, cytC553, ccmA, pldB, trnR, polA, cheB, cirA, tonB, ychF, eAL, yjhB, lysR, araJ, omlA, phbB, paaJ, phaC, phaR, gsp, rfaF, sodA, ist…		RegX3, ppc, phoB, purT, pyk, prsA, ppdK	2022-02-10	0.6900713852470489			soil	642990	China	Prokaryotes	circular	344118455	860326902	China			Alphaproteobacteria (28211)	Azospirillaceae (2829815)	Azospirillum (191)	Azospirillum brasilense	Rhodospirillales (204441)	Pseudomonadota (1224)	Azospirillum_brasilense (192)		Bacteria (2)	6980629400000000	-36216974	GCF_022023855.1	68.4	non-mob	non-mob	0	7
NZ_CP059466.1	133389	34.0	0	0	0	148	1	28	0	0	0	0	0	0	psiE, yxeA, yyaP, marR, arsR, arsN1, arsB, arsB, arsC, arsD, arsA, ydhK, asnB, copZ, copZ, tnp, sigH, hxlR, eamA, ykoY, ftsW, corA, corA, gtrA, ykoS, eamA, nhaC, tnp, abrB, tipA		phoA, phoB, phoB	2022-02-10	0.339945572723388			soil	133389	China	Prokaryotes	circular	344118455	860326902	China			Bacilli (91061)	Bacillaceae (186817)	Priestia (2800373)	Priestia megaterium	Bacillales (1385)	Bacillota (1239)	Priestia_megaterium (1404)		Bacteria (2)	-0.72992367	-4747120400000000	GCF_022023815.1	38.0	MOBL	mobilizable	0	3
NZ_CP059897.1	1382059	62.0	0	0	0	1309	10	94	0	0	0	0	0	0	soxX, soxY, soxZ, soxA, soxB, soxC, choW, hipA, purR, yesR, kduI, ugpB, ugpA, ugpE, ugpC, doeB, doeA, eutC, eutB, eutA, ehuD, ehuC, ehuB, ehuA, aRO8, bioA, dsbD, tlpA, dsbA, lacI, lacF, ugpC, actP, ydcJ, lysR, ridA, dctP, lysR, nirK, hlyD, iolD, iolC, ycjR, mviM, ycjR, rbsA, lacI, gcvA, lysR, patB, ridA, larC, larB, adhE, dapA, hisM, glnQ, gntR, dapA, gntR, gcvA, vapC, yiaG, vapC, nikD, dppB, ara…	ugpB, ugpA, ugpE, ugpC, ugpC, ugpB, ugpA, ugpC, ugpC, phnF, gcd, ugpC, ugpC, ugpA, ugpB, ugpE, ugpE, ugpA, ugpC, ugpE, ugpC, ugpC, ugpE	ugpC, ugpC, phoP, ugpC, guaA, ugpC, ugpC, ugpC, ugpC, purQ, ugpC, ugpC, phoP, phoB, ugpC, RegX3, ugpC, ugpC, ugpC, ugpC, ugpC, ugpC, ugpC	2020-08-12	0.6203541238109227			soil	1382059	China	mixed culture	circular	344118455	860326902	China			Alphaproteobacteria (28211)	Rhizobiaceae (82115)	Ciceribacter (1648508)	Ciceribacter thiooxidans	Hyphomicrobiales (356)	Pseudomonadota (1224)	Ciceribacter_thiooxidans (1969821)		Bacteria (2)	68924127	-4203750599999990	GCF_014126615.1	63.1	MOBQ	mobilizable	23	23
NZ_CP060123.1	232139	63.5	0	0	0	247	0	38	0	1	0	0	0	0	parB, marR, cheB, cheR, uspA, ppsA, uspA, istB, istA, istB, istA, hdeD, hemN, ccoN, ccoO, ccoP, ccoG, fixH, cadA, ccoS, ompW, tnpA, lspA, efeU, fecR, spoIVCA, istB, yecA, tnp, lysR, spoIVCA, iS285, traA, traL, traE, traK, traB, dsbC, traC, trbI, traW, traU, trbC, traN, marR, traF, tnp, hdeD, ompR, tolC, arsC, arsB, dsbA, dsbA, arsR, sulP, uspA, dksA, impB, tnpB, csgG, mobF, traD, copG, ssb, pemK,…		glpQ, phoD	2020-08-19	0.6347533159012488			soil	232139	South Korea: Gimhae	Cell culture	linear	3523109470000000	1288908228	South Korea,Gimhae			Alphaproteobacteria (28211)	Sphingomonadaceae (41297)	Sphingobium (165695)	Sphingobium yanoikuyae	Sphingomonadales (204457)	Pseudomonadota (1224)	Sphingobium_yanoikuyae (13690)		Bacteria (2)	65266395	-34845662	GCA_014235165.1	63.9	MOBQ	mobilizable	0	2
NZ_CP060198.1	519487	63.2	0	0	0	471	0	14	0	0	0	0	0	0	ubiH, tyrB, ilvB, fpr, hcaE, iclR, crp, fAA1, livG, livH, livM, livK, livF, paaK, pntA, pntA, tauB, tauC, tauA, yejR, ridA, gntR, ssnA, pncA, pptA, allB, dpaA, panE, glcG, glcB, dadA, ssnA, pepP, rspA, aRO8, tauA, tauB, tauC, yesE, dadA, xsc, yeiH, pta, hupE, ureH, ureG, ureC, ureB, ureF, ureE, urtE, urtD, urtC, urtB, livK, amiR, livK, argE, argE, cDA1, dcg1, livF, livG, livM, livH, livK, aRO8, q…	ugpB, ugpA, ugpE, phnY, ugpE, ugpA, ugpB	ugpC, ptsI, phnW, phnA, phny, ugpC, phny, ppc, ptxD, ugpC, pgtC	2020-08-20	0.6315480464381207			soil	519487	China	cell culture	circular	344118455	860326902	China			Alphaproteobacteria (28211)	Phyllobacteriaceae (69277)	Aminobacter (31988)	Aminobacter sp. MDW-2	Hyphomicrobiales (356)	Pseudomonadota (1224)	Aminobacter_sp._MDW-2 (2666139)		Bacteria (2)	7191674000000000	-4148911	GCF_014250155.1	63.3	MOBQ	mobilizable	7	11
NZ_CP060200.1	107222	61.0	0	0	0	98	0	16	0	0	0	0	0	0	ardC, mcrA, traG, traC, traA, traB, traH, copG, trbI, trbH, trbG, virB8, trbL, trbJ, virB4, trbD, trbC, trbB, repA, repB, repC, tniQ, scpB, ethD, glcG, gorA, panB, panC, parB, argG		ugpC	2020-08-20	0.60967898379064			soil	107222	China	cell culture	circular	344118455	860326902	China			Alphaproteobacteria (28211)	Phyllobacteriaceae (69277)	Aminobacter (31988)	Aminobacter sp. MDW-2	Hyphomicrobiales (356)	Pseudomonadota (1224)	Aminobacter_sp._MDW-2 (2666139)		Bacteria (2)	69017076	-47122297	GCF_014250155.1	63.3	MOBQ	mobilizable	0	1
NZ_CP060391.1	49070	41.7	0	0	0	51	0	9	0	0	0	0	0	0	kfrA, lgt, ompR, copA, tatA, tatB, tatC, dsbE, ccmH, lspA, czcC, czcA, parB		phoB	2020-08-25	0.4167108212757285			Antarctic soil	49070	Antarctica	single cell	circular	-794063075	0.3149311999999999	Antarctica			Gammaproteobacteria (1236)	Moraxellaceae (468)	Psychrobacter (497)	Psychrobacter sp. KCTC 72983	Moraxellales (2887326)	Pseudomonadota (1224)	Psychrobacter_sp._KCTC_72983 (2733866)		Bacteria (2)	4659867	11402284	GCF_014280455.1	44.0	non-mob	non-mob	0	1
NZ_CP062113.1	560213	63.2	0	0	0	490	1	19	0	0	0	0	0	0	lysR, fliJ, fepC, fepD, fepB, btuB, aes, acs, kynA, livK, livH, livM, livG, livF, kynU, phnK, gntR, ilvA, marR, glxA, pncA, fadH, fabG, caiD, caiA, fadM, ridA, fadB, pcaF, rbsK, malK, argH, ugpE, ugpA, ugpB, nagC, lmbE, rhaT, gntR, oppB, pdxA, baeB, csdA, lrp, phoE, potA, fbpB, afuA, atoC, afuA, gntR, prdF, puuR, ddpA, dppB, dppC, dppD, gsiA, pepP, ridA, lysR, hpaR, hpaF, hpaE, hpaD, ycgM, hpaH, …	phnK, ugpE, ugpA, ugpB, ugpB, ugpA, ugpE, phnY	ugpC, ptsI, phnW, phnA, phny, ugpC, phny, ppc, ptxD	2020-10-07	0.6320560215489466			soil	560213	France	bacterial pure culture	circular	46603354	18883335	France			Alphaproteobacteria (28211)	Phyllobacteriaceae (69277)	Aminobacter (31988)	Aminobacter sp. SR38	Hyphomicrobiales (356)	Pseudomonadota (1224)	Aminobacter_sp._SR38 (2774562)		Bacteria (2)	7181386	-4151262	GCF_014843375.1	63.4	MOBQ	mobilizable	8	9
NZ_CP062115.1	170880	58.8	2	0	0	174	3	27	0	0	0	0	0	0	lysR, tnpB, vapC, copG, groL, groES, trnI, nikD, hydA, gcvT, fhs, folD, luxR, cysA, ureC, 5_ureB_sRNA, ureG, ureD, ureE, ureF, istB, frmA, gfa, traG, traD, traC, traA, Atu_Ti1, hisJ, hisM, hisM, glnQ, queE, queC, trnL, repA, repB, ctRNA_p42d, repC, scpB, maoC, ridA, glxA, glxA, ehuC, ehuD, ehuA, lysR		ugpC, phoB	2020-10-07	0.588436329588015			soil	170880	France	bacterial pure culture	circular	46603354	18883335	France			Alphaproteobacteria (28211)	Phyllobacteriaceae (69277)	Aminobacter (31988)	Aminobacter sp. SR38	Hyphomicrobiales (356)	Pseudomonadota (1224)	Aminobacter_sp._SR38 (2774562)		Bacteria (2)	7072574	-42927885	GCF_014843375.1	63.4	MOBQ	mobilizable	0	2
NZ_CP062118.1	52741	58.3	0	0	0	59	0	20	0	0	0	0	0	0	copG, spoIVCA, chrA, traG, sSL2, higA, yozE, parB, tnpB, phnC, phnD, phnE, ldhA, lysR, spoIVCA	phnC, phnD, phnE	phnC, ptxB, ptxC, ptxD	2020-10-07	0.5830189036992094			soil	52741	France	bacterial pure culture	linear	46603354	18883335	France			Alphaproteobacteria (28211)	Phyllobacteriaceae (69277)	Aminobacter (31988)	Aminobacter sp. SR38	Hyphomicrobiales (356)	Pseudomonadota (1224)	Aminobacter_sp._SR38 (2774562)		Bacteria (2)	6.45709e+16	-4503177	GCF_014843375.1	63.4	MOBQ	mobilizable	3	4
NZ_CP063415.1	102283	43.2	1	0	0	106	1	20	0	0	0	0	0	0	mazE, fadR, glcD, glcF, fadR, potA, potB, potC, lhgO, yhcF, copG, parA, rocR, hyuA, codB, hyuA, comK, xerD, catE, pptA, caiA, rutF, fdx, pucR, mhpD, pheF, dmpG, mhpD, ypfH, mazE, doc, xerD, yvrJ, trnC, mazF, rhaT, lysR, yrpB, ecfA2, cbiQ, cbiN, cbiM, gatA, nthA, nthB		phoP	2022-05-03	0.4318606219997458			soil	102283	Spain: Sevilla, Coria del Rio	soil	circular	372892112	-60535287	Spain,Sevilla,Coria del Rio			Bacilli (91061)	Bacillaceae (186817)	Parageobacillus (1906945)	Parageobacillus thermoglucosidasius	Bacillales (1385)	Bacillota (1239)	Parageobacillus_thermoglucosidasius (1426)		Bacteria (2)	-0.45571652	-39010787	GCF_024509915.1	43.8	non-mob	non-mob	0	1
NZ_CP063451.1	207815	65.7	0	0	0	210	0	34	0	0	0	0	0	0	repA, repB, hicB, traM, mobF, tnp, gntR, mhpB, tnp, gntR, hcaB, narC, istB, istA, istA, dinB, arsR, ompR, arsB, arsR, arsD, arsA, cadA, tniQ, xerD, catA, iclR, araD, fadH2, fer, hcaF, hcaE, aRA1, fer, ligA, ligB, menH, hcaF, hcaE, flnB, lysR, Ms_IGR-7, tnp, higA, thiF, cadA, arsR, vbhA, parB, parB, araC, tetR, mobF, parE, iclR, parB, parB		phoP	2020-11-04	0.6565358612227221			Libyan oil-polluted soil	207815	Libya	oil-polluted soil	circular	268234472	181236723	Libya			Actinomycetes (1760)	Nocardiaceae (85025)	Rhodococcus (1827)	Rhodococcus pyridinivorans	Mycobacteriales (85007)	Actinomycetota (201174)	Rhodococcus_pyridinivorans (103816)		Bacteria (2)	7052384399999990	-23617327	GCF_015169995.1	68.0	non-mob	non-mob	0	1
NZ_CP063452.1	243288	67.0	0	0	0	231	0	29	0	0	0	0	0	0	flgM, arsR, ompR, arsB, arsR, arsD, arsA, cadA, tniQ, xerD, ctaD, tnp, dsbA, copC, lnt, ccsB, resB, tnp, resC, copY, arsR, cadA, lspA, arsA, arsD, arsR, arsB, merR, arsR, istA, istB, copA, cadA, uspA, eamA, gnd, lgt, luxR, blaI, lpqS, lnt, ccsB, resB, tlpA, ctaD, grpE, vbhA, uspA, cspA, tnp, tnp, yjbR, istA, istB, mobF, prgI		phoP, phoP, gnd	2020-11-04	0.6695028114826872			Libyan oil-polluted soil	243288	Libya	oil-polluted soil	circular	268234472	181236723	Libya			Actinomycetes (1760)	Nocardiaceae (85025)	Rhodococcus (1827)	Rhodococcus pyridinivorans	Mycobacteriales (85007)	Actinomycetota (201174)	Rhodococcus_pyridinivorans (103816)		Bacteria (2)	7075762299999990	-23688087	GCF_015169995.1	68.0	MOBF	mobilizable	0	3
NZ_CP063770.1	117968	39.8	0	0	0	131	2	23	0	0	0	0	1	0	tnp, relE, nadS, tnp, phnE, phnD, phnC, tnp, tnp, vbhA, tnp, tnpC, paaI, paaI, tetR, tnp, frmR, tnp, pbuX, uraH, uraD, parA, copG, tnp, tnp, gldA, fghA, frmR, ninB, repM, copG, tnp, brxL, pglZ, pglX, brxC	phnE, phnD, phnC	ptxD, ptxC, ptxB, phnC	2020-11-05	0.3983368371083683			fruit tree rhizosphere soil	117968	China: Guizhou	mixed culture	circular	27.0	107.0	China,Guizhou			Gammaproteobacteria (1236)	Moraxellaceae (468)	Acinetobacter (469)	Acinetobacter sp. Ac-14	Moraxellales (2887326)	Pseudomonadota (1224)	Acinetobacter_sp._Ac-14 (2781976)		Bacteria (2)	11168758	-8348687	GCF_015224645.1	39.0	non-mob	non-mob	3	4
NZ_CP063786.1	214777	39.8	1	0	0	206	0	24	0	0	0	0	0	0	rppB, rppA, rpoD, pcxA, czcD, cusA, sigB, sanA, cusA, arsR, copZ, ykoI, baeS, ompR, araJ, mscK, ubiE, cusA, acrA, cadA, soxR, copZ, soxR, mobB, tauE, citB, nifW, rusA, ftsK, nlpD, gpA1, ruvB, uvrC, HEARO, iscB, wD40, copG, xerD, ruvB, yoqJ, copZ, arsR, merC, spoVK, virB4, virD4, folD, wcaA, tnp, yprA, fliK, thiF, dnaN, dnaX, rsmA, polB, holA, holB, mdlB, ssb2, parA, spo0J, rppB, rppA, cysK, matE,…		phoB, phoB, phoB	2022-10-29	0.3978358949049479			soil	214777	USA: SUNY-Binghampton Campus, New York	Soil sample	circular	4208779975	-7597066065614850	United States , New York,State University of New York at Binghamton			Cyanophyceae (3028117)	Tolypothrichaceae (119859)	Tolypothrix (111782)	Tolypothrix sp. PCC 7712	Nostocales (1161)	Cyanobacteriota (1117)	Tolypothrix_sp._PCC_7712 (2596898)		Bacteria (2)	10427711	0.1080805359999999	GCF_025860405.1	40.8	non-mob	non-mob	0	3
NZ_CP064268.1	202369	33.2	0	0	0	215	5	38	0	0	0	0	0	0	copY, tnp, araC, tnp, glxA, repC, tnpA, ftsK, catA, secA, tetR, splA, splB, tnpB, arpU, aimR, fbpA, tnp, sspA, ydfG		pgtP	2022-04-06	0.3316565284208549			Zoo wolf area soil	202369	China:zhengzhou	cell culture	circular	34.72	113.64				Bacilli (91061)	Bacillaceae (186817)	Bacillus (1386)	Bacillus pseudomycoides	Bacillales (1385)	Bacillota (1239)	Bacillus_pseudomycoides (64104)		Bacteria (2)	-22420259	-4674919	GCF_022811845.1	35.7	MOBL	mobilizable	0	1
NZ_CP064685.1	380496	60.2	0	0	0	413	9	115	0	0	0	0	0	0	cyoC, czcA, ligD, rlpA, ydhR, minD, minE, cspC, tnpB, pilZ, tonB, exbD, exbB, gcrA, lysR, marR, repC, repB, repA, nadC, nadB, nadA, marR, insO, pabB, gntR, bioB, panD, bioD, tnpB, virD2, traG, copG, copG, panB, lysR, fabG, tktA1, tktA2, dctP, dctM, ntrB, lysR, mmsA, lysR, lysR, lysR, nikE, ugpC, araD1, mocE, livG, pyk, mdcB, mdcG, mdcE, mdcD, mdcC, mdcA, madL, madM, gntR, pilZ, ompA, labA, tctB, …	ugpC	ugpC, pyk	2022-04-26	0.6022060678693074	Acmispon strigosus		bulk soil	380496	USA: California	cell culture	circular	367014631	-1187559974	USA,California			Alphaproteobacteria (28211)	Nitrobacteraceae (41294)	Bradyrhizobium (374)	Bradyrhizobium sp. CW1	Hyphomicrobiales (356)	Pseudomonadota (1224)	Bradyrhizobium_sp._CW1 (2782686)		Bacteria (2)	72968307	-50591693	GCF_023100665.1	63.1	MOBQ	mobilizable	1	2
NZ_CP064933.1	352110	61.8	0	0	0	342	3	12	0	0	0	0	0	0	hisJ, hisJ, glnQ, abgB, ssuD, ssuD, repC, ctRNA_p42d, repB, repA, otsB, araC, xylF, mglA, xylH, ydfG, fabG, aroE, dctQ, tetR, creB, rpsU, alkB, lysR, ppk2, betA, malK, ugpE, ugpA, ugpB, ycjR, purR, copG, accB, accC, pxpB, pxpA, aspB, nac, ydfG, hisM, hisM, glnQ, hisJ, rraA, lacI, rbsA, ycjR, mviM, ycjR, ridA, araH, araH, mglA, rbsB, iclR, ssuD, vapC, marR, artM, artQ, hisJ, hisP, lrp, mctS, mctP,…	ugpE, ugpA, ugpB, ugpC, ugpE, ugpA, ugpB, ugpB, ugpA, ugpE	gntK, gnl, ugpC, gnl, ugpC, glpQ, ugpC, ugpE, ugpA, ugpB, ugpC	2020-11-17	0.6176336940160745	Phaseolus vulgaris		soil	352110	Kenya: Busia County	single cell	circular	0.3712048	342647952	Kenya,Busia County			Alphaproteobacteria (28211)	Rhizobiaceae (82115)	Rhizobium (379)	Rhizobium phaseoli	Hyphomicrobiales (356)	Pseudomonadota (1224)	Rhizobium_phaseoli (396)		Bacteria (2)	68535185	-4197197	GCF_012241395.2	61.6	MOBQ	mobilizable	10	11
NZ_CP064934.1	413456	62.3	2	0	0	384	1	17	0	0	0	0	0	0	araJ, flgL, araC, rhaT, fabG, rpiR, ridA, dsd1, tetR, araC, thiF, malK, ugpB, ugpE, ugpA, mviM, yghX, ydcZ, ydcZ, araC, aspA, gntR, gntR, allE, oppF, selA, ridA, dppC, dppB, ddpA, thiM, thiE, thiD, bglX, ddpA, dppB, dppC, dppD, gsiA, speE, lysR, betC, acrR, fabG, iclR, yciW, rhaI, rhaD, glpR, rhaS, ccmA, araH, araH, rhaM, fhuC, mmsB, betA, livM, livH, livF, livG, lysR, qdoI, caiA, lpd, dedA, tdh,…	ugpB, ugpE, ugpA, ugpE, ugpA, ugpB, phnP	ugpC	2020-11-17	0.6233093727022948	Phaseolus vulgaris		soil	413456	Kenya: Busia County	single cell	circular	0.3712048	342647952	Kenya,Busia County			Alphaproteobacteria (28211)	Rhizobiaceae (82115)	Rhizobium (379)	Rhizobium phaseoli	Hyphomicrobiales (356)	Pseudomonadota (1224)	Rhizobium_phaseoli (396)		Bacteria (2)	7162452	-4468118700000000	GCF_012241395.2	61.6	MOBQ	mobilizable	7	1
NZ_CP064935.1	1111454	60.9	0	0	0	1059	3	86	0	0	0	0	0	0	metC, brkB, ar14, ybgS, ugpE, yciF, yedY, yciE, fadR, dctP, dctM, dctQ, cheB, menH, ridA, lysR, pncA, xapX, ytcJ, doxX, araJ, pncA, nupO, biuH, amiF, nupP, nupN, gntR, glcD, tauB, tauA, lysR, atzF, uca, tauC, tauA, hicB, hicA, lacI, denD, malK, ugpB, ugpA, ugpE, azlD, araC, gntR, ugpB, ugpA, ugpE, pfkB, lysE, lysR, lysR, tauE, eamA, dinB, ubiA, araJ, nlpA, metN, metP, scpA, mviM, mviM, araC, ugpB…	ugpE, ugpB, ugpA, ugpE, ugpB, ugpA, ugpE, ugpB, ugpA, ugpE, ugpA, ugpE, ugpQ, ugpE, ugpC, ugpB, ugpE, ugpE, ugpA, ugpB, phoU, ugpE, ugpA, ugpE, ugpA, ugpA, ugpE, ugpB, ugpB, ugpA, ugpE, ugpB, ugpA, ugpE	ugpC, ugpC, ugpC, glpQ, ugpC, ugpC, ugpC, phoB, ugpC, ugpC, ugpC	2020-11-17	0.6088592060490132	Phaseolus vulgaris		soil	1111454	Kenya: Busia County	single cell	circular	0.3712048	342647952	Kenya,Busia County			Alphaproteobacteria (28211)	Rhizobiaceae (82115)	Rhizobium (379)	Rhizobium phaseoli	Hyphomicrobiales (356)	Pseudomonadota (1224)	Rhizobium_phaseoli (396)		Bacteria (2)	6858745	-4150944	GCF_012241395.2	61.6	MOBQ	mobilizable	34	11
NZ_CP065402.1	204701	50.1	0	0	0	236	2	46	0	1	0	0	1	0	xerD, tnp, isrN, tnp, tnp, istB, tnp, tnp, yoaA, rmpA, rmpC, peg-344, iroN, iroD, iroC, iroB, spo0J, ybdN, fecI, fecA, rES, sok, tnp, tnp, pagO, pifC, yebA, korC, vagC, vapC, rmpA2, luxR, iutA, iucD, iucC, iucB, iucA, def, cobW, tnp, tnp, silE, silS, silR, silC, silF, silB, silA, silP, nlpD, pcoA, pcoB, pcoC, pcoD, pcoR, pcoS, cadR, cadA, lspA, spoIVCA, tnpA, phnO, hemB, pyrC, paaY, folE2, dksA, …	phnO	RegX3, phoB, phoH, phoH	2020-12-08	0.5014631096086487			meropenem treated soil	204701	China: Beijing		circular	39.99	116.39		repB_KLEB_VIR, AP006726, |IncHI1B(pNDM-MAR)_1, JN420336,	IncHI1 MLST(-):HCM1_043(-);HCM1_064(-);HCM1_099(-);HCM1_116(-);HCM1_178ac(-);HCM1_259(-)	Gammaproteobacteria (1236)	Enterobacteriaceae (543)	Klebsiella (570)	Klebsiella pneumoniae	Enterobacterales (91347)	Pseudomonadota (1224)	Klebsiella_pneumoniae (573)		Bacteria (2)	3.14748e+16	-52709727	GCF_015832035.1	57.5	MOBF	mobilizable	1	4
NZ_CP065409.1	94278	65.0	0	0	0	100	0	26	0	0	0	0	0	0	tnpB, tnpB, cadR, tolC, ompA, trfB, parA, korA, trbM, tnp, tolC, hlyD, cusA, cadR, tnpB, tnpB, lpxC, thiC, tnpB, tnpB, vapC, vapC, araC		phoB	2020-12-08	0.6497380088673922			soil	94278	Brazil	whole organism	circular	-103333333	-53.2	Brazil			Betaproteobacteria (28216)	Comamonadaceae (80864)	Diaphorobacter (238749)	Diaphorobacter sp. JS3051	Burkholderiales (80840)	Pseudomonadota (1224)	Diaphorobacter_sp._JS3051 (2792224)		Bacteria (2)	49936337	-26544337	GCF_015832135.1	66.3	non-mob	non-mob	0	1
NZ_CP066311.1	307780	62.7	0	0	0	313	1	46	0	0	0	0	0	0	tnp, lysR, hutI, yjlB, mmsB, pdxI, ygiN, purR, vapC, lacI, ssuD, pdxI, tauA, tonB, tolQ, exbD, yfcL, traI, traI, tnpA, dnaJ, ppx, ppk1, ompR, ppk2, fabG, tnp, doxX, araC, araC, katG, yfcL, cobM, cbiG, cbtA, cbtB, cobW, cobN, chlI, chlD, cobF, cobG, cbiE, lysR, tnpB, ycfA, copG, oprD, betA, higA, araC, lysR, lysR, tnpB, eamA, araC, lysR, hicB, tnpB, cyaB, vapC, vagC, tnp, deoR, araC, fabG, lysR, w…		phoX, ppx, ppk, ugpC	2020-12-28	0.6273572031970889			soil	307780	China:Shanxi	single	circular	37.0	112.0	China,Shanxi			Gammaproteobacteria (1236)	Pseudomonadaceae (135621)	Azotobacter (352)	Azotobacter chroococcum	Pseudomonadales (72274)	Pseudomonadota (1224)	Azotobacter_chroococcum (353)		Bacteria (2)	6003952	-28719585	GCF_016406165.1	66.4	non-mob	non-mob	0	4
NZ_CP067125.1	429813	65.0	0	0	0	393	0	10	0	0	0	0	0	0	acrR, aldA, iolB, iolE, iolD, iolG, ccmA, citE, luxR, sucD, gntR, amtB, gltB2, glnT, glxA, dadA, folD, purU, ygiN, lysR, livH, lysR, glxA, yiiM, higA, ompR, lysR, parB, yceI, tctC, tctB, lysR, tctC, iclR, nikC, oppF, ytoQ, opgC, ntrC, lysR, fdnG, fdxH, fdhE, fhuB, gntR, gntR, pcaG, pcaH, pcaC, pcaD, lysR, gldA, dctP, dctM, marR, gntR, dctP, thpD, hutU, hutG, hutH, hutI, gntR, gntR, gntR, tctC, ar…		ugpC, phnD_phosphite	2023-02-10	0.6497546607478136			soil	429813		whole organism	circular						Alphaproteobacteria (28211)	Paracoccaceae (31989)	Paracoccus (265)	Paracoccus alcaliphilus	Rhodobacterales (204455)	Pseudomonadota (1224)	Paracoccus_alcaliphilus (34002)		Bacteria (2)	748476	-39336133	GCF_028553725.1	64.2	non-mob	non-mob	0	2
NZ_CP067126.1	402633	64.8	2	0	0	375	0	34	0	0	0	0	0	0	parA, parB, aztA, aztB, aztC, tnp, soxZ, soxY, nikD, iclR, glcF, glcE, iclR, fUI1, dcg1, gntR, acs, actP, tnp, glxA, tetR, yghX, oxlT, gntR, sucD, sucD, sucC, gntR, oxc, frc, fadR, pdxA, nikD, cysD, cysN, xylB, rbsB, araH, ydfG, impA, tssB, tssC, impF, tssF, tssG, tssH, iclR, dctP, lacI, selA, fdhE, fdxH, fdnG, ssuD, npdG, cofE, cofC, cofH, cofG, tniQ, trnR, tnpB, tnp, rbsA, arsR, ydfG, exbD, exb…		RegX3	2023-02-10	0.6476021587897663			soil	402633		whole organism	circular						Alphaproteobacteria (28211)	Paracoccaceae (31989)	Paracoccus (265)	Paracoccus alcaliphilus	Rhodobacterales (204455)	Pseudomonadota (1224)	Paracoccus_alcaliphilus (34002)		Bacteria (2)	7393557	-39822123	GCF_028553725.1	64.2	non-mob	non-mob	0	1
NZ_CP067127.1	305818	64.1	0	0	0	246	0	23	0	0	0	0	0	0	repA, repB, repC, gfa, tssA, tssB, tssC, tssE, tssF, tssG, tssJ, tssK, icmH, tssM, impM, vgrG, dotU, ompA, tssH, eutB, doeA, doeB, kduD, kduI, gntR, tnp, livH, mbtH, solG, entD, csgD, marR, arsR, iscR, gntR, tctC, tctA, tcuB, tcuA, gntR, tctC, ompR, qseC, ccmA, fecR, tonB, lysR, hxlR, lysR, ahpD, lysR, ggt, uspA, gntR, ubiE, csgD, arsH, arsB, arsC, arsR, phzF, araC, hxlR, hmoA, tnp, tnp, sulP, tn…		phoB	2023-02-10	0.6410021646861859			soil	305818		whole organism	circular						Alphaproteobacteria (28211)	Paracoccaceae (31989)	Paracoccus (265)	Paracoccus alcaliphilus	Rhodobacterales (204455)	Pseudomonadota (1224)	Paracoccus_alcaliphilus (34002)		Bacteria (2)	74311604	-39112093	GCF_028553725.1	64.2	non-mob	non-mob	0	1
NZ_CP067128.1	77023	60.4	0	0	0	91	0	11	0	0	0	0	0	0	repA, repB, repC, repC, tnp, dctP, lacI, tnpB, tnp, tnpB, lysR, tauA, lysR, lysR, lacI, hisD, virD2, tnp, traG, parA, parG, tnp, abrB		ugpC	2023-02-10	0.6041831660672786			soil	77023		whole organism	circular						Alphaproteobacteria (28211)	Paracoccaceae (31989)	Paracoccus (265)	Paracoccus alcaliphilus	Rhodobacterales (204455)	Pseudomonadota (1224)	Paracoccus_alcaliphilus (34002)		Bacteria (2)	8298989	-4311539	GCF_028553725.1	64.2	MOBQ	mobilizable	0	1
NZ_CP067141.1	242883	60.8	0	0	0	234	0	33	0	0	0	0	0	0	repA, repB, repC, ompA, hutC, gntR, hutI, hutH, hutG, hutU, gntR, marR, marR, merR, copZ, nadC, nadA, cobW, cobN, cobG, cbiE, cobM, cobF, ureG, ureF, ureE, ureC, 5_ureB_sRNA, ureA, ureD, katG, gntR, iclR, nagB, cutC, hlyD, glf, insH, cysN, cysD, glf, lysR, trbF, trbL, trbJ, trbE, trbD, trbC, trbB, yecA, copG, traG, ssb, copG, rfbC, rfbB, rfbD, rfbA, mazE, scpB		ugpC	2023-02-10	0.6079140985577418			saline-alkali soil	242883	China:Xinjiang province, edge of Ebinur Lake wetland natural reserve	cell culture	circular	41.5	85.5	China,Xinjiang			Alphaproteobacteria (28211)	Paracoccaceae (31989)	Paracoccus (265)	Paracoccus saliphilus	Rhodobacterales (204455)	Pseudomonadota (1224)	Paracoccus_saliphilus (405559)		Bacteria (2)	76492515	-4089346	GCF_028553805.1	61.1	MOBQ	mobilizable	0	1
NZ_CP067226.1	113686	64.7	0	0	0	118	0	21	0	0	0	0	0	0	lysM, pcaF, aliA, menB, marR, gstA, arsJ, istB, tnp, tnp, vapC, tnpB, vapB, tadA, virB9, virB8, virB5, luxR		phoX	2021-01-15	0.6474939746318807			river bed soil	113686	China: Qinghai	pure cultures of bacteria	circular	36.0	96.0	China,Qinghai			Alphaproteobacteria (28211)	Paracoccaceae (31989)	Paracoccus (265)	Paracoccus sp. MC1862	Rhodobacterales (204455)	Pseudomonadota (1224)	Paracoccus_sp._MC1862 (2760307)		Bacteria (2)	7519617999999990	-39891267	GCF_016617715.1	67.6	non-mob	non-mob	0	1
NZ_CP068235.1	76263	51.3	0	0	0	86	1	22	0	1	0	0	0	1	sraL, arsH, arsR, arsB, arsC, mobA, traI, trbA, scrR, scrB, scrA, scrY, scrK, tnp, tnpR, chrA, padR, arsH, arsR, arsC, tnp, vapC, vagC, parD, parE, pcoE, pcoS, pcoR, pcoD, pcoC, pcoB, pcoA, nlpD, silP, silA, silB, silF, silC, silR, silS, silE, xerD, sopA		phoB, RegX3	2022-06-02	0.5132239749288646			Garlic rhizosphere soil	76263	China:jining	cell culture	circular	354125047	1165849266	China,jining			Gammaproteobacteria (1236)	Enterobacteriaceae (543)	Leclercia (83654)	Leclercia adecarboxylata	Enterobacterales (91347)	Pseudomonadota (1224)	Leclercia_adecarboxylata (83655)		Bacteria (2)	1038373	19119661	GCF_023612295.1	56.1	MOBF	mobilizable	0	2
NZ_CP068436.1	1185855	62.2	2	0	0	1178	14	200	0	0	0	0	0	0	adhP, mhpB, mhpD, mhpF, dmpG, bphD, fabG, hipB, atoC, tctC, vapC, fadR, lysR, eutG, lysR, rhaT, tctC, greA, hipB, panP, doxX, lysR, dadA, ehuA, ehuD, hisJ, iclR, hipA, xerD, ilvE, vapC, lysR, glaH, lldD, qor, fabG, nirD, frnE, tctC, qor, araJ, ydeN, tauD, gntR, araD, rraA, tctC, argS, vapC, ydaS, araJ, hipB, lysR, iclR, ethD, arsR, lysR, yncE, rraA, rraA, lysR, caiD, galU, gmd, fghA, frmA, lysR, …		gnl, gnl, ppc, lysR, prsA, phoB, RegX3, gnl, RegX3	2021-01-28	0.6216046649885526			heavy metal containmented soil	1185855	China:Fujian provience, Longyan city, Zijin gold and copper mning		circular	25.09	116.23				Betaproteobacteria (28216)	Burkholderiaceae (119060)	Cupriavidus (106589)	Cupriavidus necator	Burkholderiales (80840)	Pseudomonadota (1224)	Cupriavidus_necator (106590)		Bacteria (2)	5538416000000000	-3.29496e+16	GCF_016757775.1	66.4	non-mob	non-mob	0	9
NZ_CP068596.1	256223	44.7	0	0	0	242	1	97	0	0	0	0	0	0	yvrJ, coiA, traM, tadA, gspF, gspF, yunB, fabD, ectB, hicB, thiF, arpU, ltrA, copG, yvrJ, phoB, vanZ, repB	phoB	phoB	2021-01-31	0.4473759186333779			soil	256223	South Korea	cell culture	circular	365581914	1279408564	South Korea			Bacilli (91061)	Paenibacillaceae (186822)	Paenibacillus (44249)	Paenibacillus sonchi	Bacillales (1385)	Bacillota (1239)	Paenibacillus_sonchi (373687)		Bacteria (2)	11673484	-0.616417	GCF_016772475.1	50.8	MOBH	mobilizable	1	1
NZ_CP068711.1	303664	62.8	0	0	0	334	0	82	0	0	0	0	0	0	ccsB, resB, tlpA, ccdA, tlpA, yncE, doxX, ltrA, ftsH, nfeD, ppk2, ftsH, hypA, hypF, hypD, hypE, ompR, tolC, sufI, copC, copD, nrsF, doxX, merT, merP, tonB, dsrE, tolC, dsbD, ccdA, tlpA, msrQ, doxX, lysR, merE, merD, merB, merA, merC, merP, merT, merR, ccdA, arsR, arsC, arsN2, padR, secA, asnC, dsbD, traG, traH, traF, traN, traN, trbC, traU, traW, trbI, traC, traV, dsbC, traK, traE, traL, ncS54, C…		phoP, prsA	2021-02-02	0.6280625955002898			soil	303664	Singapore		circular	129555	10376398				Betaproteobacteria (28216)	Burkholderiaceae (119060)	Burkholderia (32008)	Burkholderia thailandensis	Burkholderiales (80840)	Pseudomonadota (1224)	Burkholderia_thailandensis (57975)		Bacteria (2)	5404714	-35253422	GCF_016774495.1	67.2	MOBQ	mobilizable	0	2
NZ_CP070369.1	460652	64.3	0	0	0	415	2	12	0	0	0	0	0	0	parB, parA, vapC, urtA, urtB, urtC, urtD, urtE, ompA, vgrG, tagF, tssM, icmH, tssK, tssJ, tagH, tssG, tssF, hcp, tssC, tssB, impA, tssH, fabB, cdiI, nnrS, bioY, lptB, hlyD, cerR, lysR, metB, fadH, marR, caiD, caiA, ridA, acs, livK, livH, livM, livG, livF, marR, cyoD, cyoC, cyoB, cyoA, kdpD, ompR, marR, fabG, menE, paaJ, dctP, dctM, iclR, atoD, atoA, pcaF, lysR, pcaD, pcaC, pcaH, pcaG, hisN, nikE,…	phnF, phnG, phnH, phnI, phnJ, phnK, phnL, phnN, phnM	RegX3, phnF, phnG, phnH, phnI, phnJ, phnK, phnL, phnN, phnN, phnM, ugpC, ugpC	2021-02-25	0.6427932582513481			grassland soil	460652	Germany: exploratory Hainich	whole organism	circular	5.10811e+16	104584642	Germany,exploratory Hainich			Alphaproteobacteria (28211)	Paracoccaceae (31989)	Paracoccus (265)	Paracoccus methylovorus	Rhodobacterales (204455)	Pseudomonadota (1224)	Paracoccus_methylovorus (2812658)		Bacteria (2)	73365135	-38659515	GCF_016919705.1	63.5	non-mob	non-mob	9	13
NZ_CP070372.1	244195	61.8	0	0	0	244	0	32	0	0	0	0	0	0	lysR, zinT, lysR, azlC, azlD, gntR, lysR, lprI, ccmA, rbsK, deoC, copG, araC, ssuD, tauA, tauC, tauB, ycnI, copC, ssuD, tauA, ssuB2, phnE, phnE, phnC, lysR, mauF, mauB, mauD, mauA, mauJ, napG, napH, oppF, aldA, hipA, tnpB, lysR, ubiD, ubiX, ycjR, betA, bglX, tnp, tnp, aspA, ugpB, ugpA, ugpE, malK, betA, malK, afuA, fbpB, vapC, csgD, marR, gntR, matC, tnp, tnp, moxX, moxZ, moxF, moxJ, moxG, moxI, …	phnE, phnE, phnC, ugpB, ugpA, ugpE	phnC, phoP, ugpC, ugpC	2021-02-25	0.6178545834271791			grassland soil	244195	Germany: exploratory Hainich	whole organism	circular	5.10811e+16	104584642	Germany,exploratory Hainich			Alphaproteobacteria (28211)	Paracoccaceae (31989)	Paracoccus (265)	Paracoccus methylovorus	Rhodobacterales (204455)	Pseudomonadota (1224)	Paracoccus_methylovorus (2812658)		Bacteria (2)	7323755	-41683097	GCF_016919705.1	63.5	non-mob	non-mob	6	4
NZ_CP070610.1	1241328	64.8	2	0	0	1185	13	195	0	0	0	0	0	0	tetR, marR, parG, copG, trnI, citB, hxlB, hxlA, zwf, gnd, pgi, pknK, iclR, iclR, mhpF, dmpG, adhE, yqjQ, paaJ, thcR, thcB, thcC, thcD, marR, acnA, iclR, tetR, lysR, paaD, tetR, lysR, lysR, lysR, folD, purU, lysR, puuP, lacI, yCII, araC, ydfG, gntR, prpD, gntR, pknK, alr, gntR, betB, ydfG, rpoE, tetR, yadH, ccmA, arsR, dinB, ubiE, phoU, pknK, gntR, pdhA, lpdA, otnC, otnK, asnC, lysR, dapA, yeiE, a…	phoU	gnd, phoU, pckG, gnd, ppdK, adk, purA	2021-03-05	0.6476281852983257			rhizosphere of apple plantlets grown in replant diseased soil	1241328	Germany: Ellerhoop	cell culture	linear	537293593	97773969	Germany,Ellerhoop			Actinomycetes (1760)	Nocardiaceae (85025)	Rhodococcus (1827)	Rhodococcus koreensis	Mycobacteriales (85007)	Actinomycetota (201174)	Rhodococcus_koreensis (99653)		Bacteria (2)	7010650599999990	-24258993	GCF_017068375.1	67.7	non-mob	non-mob	1	7
NZ_CP070613.1	56535	64.0	0	0	0	69	0	40	0	0	0	0	0	0	tetR, gntR, phnD, phnC, phnE, phoU, yafJ	phnD, phnC, phnE, phoU	phnC, phoU	2021-03-05	0.6396391615813213			rhizosphere of apple plantlets grown in replant diseased soil	56535	Germany: Ellerhoop	cell culture	linear	537293593	97773969	Germany,Ellerhoop			Actinomycetes (1760)	Nocardiaceae (85025)	Rhodococcus (1827)	Rhodococcus koreensis	Mycobacteriales (85007)	Actinomycetota (201174)	Rhodococcus_koreensis (99653)		Bacteria (2)	7039884	-2411588	GCF_017068375.1	67.7	non-mob	non-mob	4	2
NZ_CP070615.1	320146	66.1	0	0	0	330	4	70	0	0	0	0	0	0	parA, copG, istB, tcpC, tcpE, virB4, mltE, istB, istA, ftsK, menH, cpaF, tadB, gspF, tadG, xkdP, copG, nlpC, tnsA, padR, tolA, yCII, cysD, tniQ, whiB, recA, dNA2, tnp, gloB, ctaD, tetR, copC, sPS1, dtxR, copC, ccsB, ctaD, lnt, resB, resC, tlpA, istB, istA, cyoC, arsR, arsR, psp3, fbpC3, fbpB, afuA, arsA, arsD, arsB, arsR, dinB, frmR, araC, dinB, tlpA, ccdA, copC, tlpA, ccdA, copC, mmcO, mdtH, lpq…		phoD, phoP	2021-03-05	0.6611514746396956			rhizosphere of apple plantlets grown in replant diseased soil	320146	Germany: Ellerhoop	cell culture	linear	537293593	97773969	Germany,Ellerhoop			Actinomycetes (1760)	Nocardiaceae (85025)	Rhodococcus (1827)	Rhodococcus pseudokoreensis	Mycobacteriales (85007)	Actinomycetota (201174)	Rhodococcus_pseudokoreensis (2811421)		Bacteria (2)	6998636	-24609072	GCF_017068395.1	67.5	non-mob	non-mob	0	2
NZ_CP071809.1	185643	33.0	0	0	0	174	5	32	0	0	0	0	0	0	ftsK, umuC, tnp, lysE, umuC, orfB, ybjQ, ardC, citA, ybjQ, katG, rhtB, tnpC, marR, orfB, fbpA, tnpB, ybjQ, lysM, tnp, yndE, bsrC, mutT, tnpB, repC		pyrE, phoP	2021-06-09	0.3300043632132641			soil	185643	Poland: farmland in Jasienowka	cell culture	circular	525320559	229680514	Poland,farmland in Jasienowka			Bacilli (91061)	Bacillaceae (186817)	Bacillus (1386)	Bacillus mycoides	Bacillales (1385)	Bacillota (1239)	Bacillus_mycoides (1405)		Bacteria (2)	-2296622	-4699456700000000	GCF_018739705.1	35.7	MOBL	mobilizable	0	2
NZ_CP072056.1	481845	32.9	0	0	0	442	5	48	0	0	0	0	0	0	dinB, ftsK, traM, cpaB, gspF, gspF, yicC, galU, prgI, herA, ltrA, dltB, lysE, malK, lolD, tnp, padR, araC, arpU, tnp, dltA, solG, tnp, acrR, araJ, pucR, ald, yrzO, phoP, ybjQ, qdoI, cDA1, ftsN, dAP2, bsh, ftsW, mgtE, nAGPA, tnp, map, hfq, xerS, fliK, sepF, yxeA, ftsK, alr, recU, ltrA, arsR, splA, betT, mmuM, mmuP, tnpB, tar, bsrC, cdnL, tnp, eamA, tnp, lanM, spoT, tnpB, satA, asnB, acrR, araC, ye…	phoP	phoB, ugpC, phoP, spoT	2021-06-09	0.3294337390654671			soil	481845	Poland: farmland in Jasienowka	cell culture	circular	525320559	229680514	Poland,farmland in Jasienowka			Bacilli (91061)	Bacillaceae (186817)	Bacillus (1386)	Bacillus mycoides	Bacillales (1385)	Bacillota (1239)	Bacillus_mycoides (1405)		Bacteria (2)	-21462376	-4598669	GCF_018742105.1	35.5	MOBL	mobilizable	1	4
NZ_CP072058.1	205885	33.4	0	0	0	189	1	21	0	1	0	0	0	0	ftsK, pucR, ald, yrzO, dAP2, tnp, ybjQ, tnp, lolD, malK, lysE, dltB, dltC, arsR, papR, sulP, dltC, gatD, murT, ybjQ, tnpB, katE, tnp, accA, tnpB, orfB		phoP, ugpC, phoB, phoP	2021-06-09	0.3335745683269786			soil	205885	Poland: farmland in Jasienowka	cell culture	circular	525320559	229680514	Poland,farmland in Jasienowka			Bacilli (91061)	Bacillaceae (186817)	Bacillus (1386)	Bacillus mycoides	Bacillales (1385)	Bacillota (1239)	Bacillus_mycoides (1405)		Bacteria (2)	-22749217	-4671814	GCF_018742045.1	35.6	MOBL	mobilizable	0	4
NZ_CP072062.1	487361	33.0	0	0	0	455	6	53	0	0	0	0	0	0	dinB, ftsK, traM, cpaB, gspF, gspF, yicC, galU, prgI, herA, ltrA, dltB, lysE, malK, lolD, tnp, padR, araC, arpU, tnp, dltA, solG, rfbG, rfbF, acrR, araJ, pucR, ald, yrzO, phoP, ybjQ, qdoI, cDA1, ftsN, dAP2, bsh, ftsW, mgtE, nAGPA, tnp, map, hfq, xerS, bclA, sepF, yxeA, ftsK, alr, recU, ltrA, arsR, splA, betT, mmuM, mmuP, tnpB, tar, bsrC, cdnL, tnp, lanM, spoT, tnpB, satA, asnB, acrR, araC, yesE, …	phoP	phoB, ugpC, phoP, spoT	2021-06-09	0.3298950880353578			soil	487361	Poland: farmland in Jasienowka	cell culture	circular	525320559	229680514	Poland,farmland in Jasienowka			Bacilli (91061)	Bacillaceae (186817)	Bacillus (1386)	Bacillus mycoides	Bacillales (1385)	Bacillota (1239)	Bacillus_mycoides (1405)		Bacteria (2)	-2.16262e+16	-4.62143e+16	GCF_018742185.1	35.5	MOBL	mobilizable	1	4
NZ_CP072066.1	400631	33.6	0	0	0	386	5	52	0	0	0	0	0	0	tnp, yxeA, ftsK, umuC, merR, map, aimR, traM, traM, virB4, ltrA, merR, copG, copG, abrB, hfq, hfq, thsA, ahpF, ahpC, arpA, ltrA, cdnL, bsrC, tar, vanR, lolD, tnp, pucR, tnp, xerS, nAGPA, mgtE, ftsW, bsh, yxeA, phoP, cDA1, qdoI, abrB, tnp, arpU, araC, fliK, abrB, solG, dltA, ampC, tnp, hfq, fadH2, tnpC, mgtA, ftsW, ftsW, mgtE, umuC, marR, pseI, pseH, pseG, pseC, tnp, arpU, araC, tnp, map, hfq, asn…	phoP	phoB, phoB	2021-06-09	0.3356829601303943			soil	400631	Poland: Bialowieza National Park	cell culture	linear	527623571	238674192	Poland,Bialowieza National Park			Bacilli (91061)	Bacillaceae (186817)	Bacillus (1386)	Bacillus mycoides	Bacillales (1385)	Bacillota (1239)	Bacillus_mycoides (1405)		Bacteria (2)	-21862705	-4619511	GCF_018742205.1	35.6	MOBL	mobilizable	1	2
NZ_CP072476.1	137532	34.0	0	0	0	151	1	30	0	0	0	0	0	0	yxeA, fabH, padR, hxlR, marR, trkH, lysR, aspA, psiE, ttdB, ttdA, lysR, merR, dinB, cshA, yoyH, tetR		phoA	2021-04-06	0.3397100311200302			soil	137532	China:Shenyang	mixed culture	circular	416749893	123458674	China,Shenyang			Bacilli (91061)	Bacillaceae (186817)	Priestia (2800373)	Priestia aryabhattai	Bacillales (1385)	Bacillota (1239)	Priestia_aryabhattai (412384)		Bacteria (2)	-0.7526352	-47668443	GCF_017743055.1	38.1	MOBL	mobilizable	0	1
NZ_CP073634.1	152430	67.2	0	0	0	133	0	20	0	0	0	0	0	0	iclR, virB1, virB2, virB3, virB4, virB5, eexN, virB6, virB7, virB8, virB9, virB11, virD4, msrA, dps, pfpI, lysR, ribD, paoC, yagS, paoA, lysR, dsbA, mobC, repB, repA, repC, repA, traC, vapC, arsB, arsC, arsR, arsH, tnp, betB, pedF, glcF		phoB, purQ	2023-05-24	0.6716919241619104			Oil-contaminated soil	152430	Japan	cell culture	circular	365748441	1392394179	Japan			Alphaproteobacteria (28211)	Methylobacteriaceae (119045)	Methylorubrum (2282523)	Methylorubrum extorquens	Hyphomicrobiales (356)	Pseudomonadota (1224)	Methylorubrum_extorquens (408)		Bacteria (2)	6932648	-3709111	GCF_030062705.1	68.0	non-mob	non-mob	0	2
NZ_CP073678.1	1670509	62.4	1	1	0	1708	26	338	0	0	0	0	0	0	arsA, arsD, arsH, arsC, arsC, arsR, tnp, tnp, tetR, doxX, ybgF, uspA, potE, parD, parE, secA, cspD, rpoD, trnI, hns, tnpB, tnp, kfrA, pstS, dmpG, tnsA, ppk2, sulP, tolC, kdgD, araC, ydfG, hepA, vapC, vapB, imuA, tnp, sRAP, ligD, ykoV, tPR, tnp, tnpB, Betaproteobacteria_toxic_sRNA, ridA, pntB, pntA, pntA, tetR, yjgH, tnpB, tnp, tnpC, nhaR, terC, hns, ahpD, gntR, glxA, kfrA, mmsB, exsA, ybgF, hns, …	pstS, pstS	ppk, ppk, ppk, ppk, ppk, pstS, phoB, phoB, pstS, ppk, pit, phoB, gdh, gdh, pps, pyk	2021-05-12	0.62394455821549			A bacterial consortium from cattle pasture soil, USA	1670509	USA: farm land in Gulf Coast of Texas	Isolate	circular	29099876	-97356256	USA,farm land in Gulf Coast of Texas			Betaproteobacteria (28216)	Burkholderiaceae (119060)	Cupriavidus (106589)	Cupriavidus sp. KK10	Burkholderiales (80840)	Pseudomonadota (1224)	Cupriavidus_sp._KK10 (1478019)		Bacteria (2)	54953218	-32915542	GCF_018223725.1	66.4	MOBH	mobilizable	2	16
NZ_CP074103.1	517982	70.7	2	0	0	536	3	122	0	0	0	0	0	0	parB, ompA, ligA, ftsH, ybhN, htpX, merR, copY, cadA, cbtA, mdtH, ehuA, tnpA, tnpB, htpX, mgtA, crgA, lgt, lnt, ccdA, nlpC, resB, ccsB, ligA, fabG1, ptlH, gspF, gspF, umuC, ligA, tetR, kfrA, ligA, chrB, fetB, yncE, trpA, copC, resC, arsR, merR, ynfA, arsR, padR, doxX, yajR, tusA, tetR, jmjC, fxlM, tpgA1, himA, cspC, trnfM, coiA, lexA, whiB, trnW		phoB, pstB	2021-05-14	0.7065998432377959			fresh creek bank soil, topsoil	517982	Germany: Eastern Thuringia, Gessenbach near Ronneburg,		linear	5085757	1214234				Actinomycetes (1760)	Streptomycetaceae (2062)	Streptomyces (1883)	Streptomyces mirabilis	Kitasatosporales (85011)	Actinomycetota (201174)	Streptomyces_mirabilis (68239)		Bacteria (2)	723111	-29864328	GCF_018310535.1	70.2	non-mob	non-mob	0	2
NZ_CP075910.1	70476	26.6	0	0	0	71	0	12	0	0	0	0	1	0	lexA, virS, tnp, tnpA, tnp, xerD, tcpA, ftsK, tcpD, tcpF, ltrA, tcpF, tcpG, tcpH, tcpJ, dcm, tnp, cpe		phoB	2021-09-29	0.2656649072024519			soil	70476	Unknown		linear						Clostridia (186801)	Clostridiaceae (31979)	Clostridium (1485)	Clostridium perfringens	Eubacteriales (186802)	Bacillota (1239)	Clostridium_perfringens (1502)		Bacteria (2)	-36327786	-41872077	GCF_020138375.1	28.4	MOBM	mobilizable	0	1
NZ_CP078082.1	403981	33.0	1	0	0	335	5	54	0	1	0	0	0	0	traX, yxdL, ltrA, cdiI, arpU, recU, tnp, grsT, sfp, solG, dltA, lysR, rhaT, ampC, bceA, arpU, recU, traM, traM, tnpB, tcpC, merR, marR, tnpB, marR, lysM, trnI, bla, azlD, azlC, gntR, acrR, asnB, mutT, ltrA, radC, tetR, tnpA, ushA, cesH, yhcF, rimL, tar, tnp, vanR-A, vanS, vanZ, eda, kduI, kduD, galM, galK, galT, padR, xerS, gadA, ccmA, colA, araJ, acrR, arsR, acrR, sdaC, sdaAA, sdaAB, lrp, potE, …		spoT, RegX3	2022-04-29	0.3300947321779984			soil sample	403981	India: New Delhi	Cell culture	circular	286138954	772090057	India,New Delhi			Bacilli (91061)	Bacillaceae (186817)	Bacillus (1386)	Bacillus tropicus	Bacillales (1385)	Bacillota (1239)	Bacillus_tropicus (2026188)		Bacteria (2)	-23271163	-4666761	GCF_023159405.1	35.5	MOBL	mobilizable	0	2
NZ_CP078083.1	181195	32.6	0	0	0	156	4	19	0	0	0	0	0	0	aimR, merR, traM, traM, virB4, merR, copG, copG, cpaB, citB, ybjQ, gerQA, gerQB, gerQC, azoR, marR, prsA, papR, xerS, ald, pucR, pucB, xdhC, cutS, cutB, coxL, fadR, ftsK		phoP, phoP	2022-04-29	0.3263059135185849			soil sample	181195	India: New Delhi	Cell culture	circular	286138954	772090057	India,New Delhi			Bacilli (91061)	Bacillaceae (186817)	Bacillus (1386)	Bacillus tropicus	Bacillales (1385)	Bacillota (1239)	Bacillus_tropicus (2026188)		Bacteria (2)	-2.31283e+16	-4.66711e+16	GCF_023159405.1	35.5	MOBL	mobilizable	0	2
NZ_CP079740.1	47028	24.2	0	0	0	57	0	13	0	0	0	0	0	0	srtB, bclA, copG, marR, uspA		phoB	2021-09-11	0.2419197074083524			soil	47028		whole organism	circular						Clostridia (186801)	Clostridiaceae (31979)	Paraclostridium (1849822)	Paraclostridium bifermentans	Eubacteriales (186802)	Bacillota (1239)	Paraclostridium_bifermentans (1490)		Bacteria (2)	12017041	-16302048	GCF_019916025.1	28.8	MOBM	mobilizable	0	1
NZ_CP079881.1	168866	35.3	0	0	0	192	2	22	0	1	0	0	0	0	sinI, copG, relE, abrB, tnp, tnp, relE, abrB, SpF66_sRNA, traE, arpU, srtA1, tnp, topB, ssb, SpF66_sRNA, uvrA, arpU, copG, tnp, msrA, tnp, tnp, lexA, clpL, spoIVCA, tnp, tnp, manC, fetA, fetB, tnp, tnp, xerS, gtfA, msmF, tnp, lacI, relE, tnp, panE, pfoR, tnp, tnp, cadA, arsR, czcD, cadD, cadA, copZ, lgt, dps, tnp, padR, pgmB, tnp, tnp		phnW, phnW, phnW	2021-07-28	0.3531972096218303			soil	168866	China:Nanchang	pure culture	circular	286792695	1158885987	China,Nanchang	repUS15_2_repA(pNB2354p1), CP004064, |rep29_3_ORF8(pCIZ2), DQ832184,		Bacilli (91061)	Enterococcaceae (81852)	Enterococcus (1350)	Enterococcus lactis	Lactobacillales (186826)	Bacillota (1239)	Enterococcus_lactis (357441)		Bacteria (2)	6707729	5366225	GCF_019343125.1	38.5	MOBL	mobilizable	0	3
NZ_CP079886.1	66077	51.0	1	0	0	76	2	14	0	2	0	0	3	1	aac(3)-IId, trnT, tnp, tnp, parF, tnp, tnp, relE, ddp1, copG, tnp, spoIVCA, floR, tnp, tnp, tnp, tnp, silP, silA, silB, silC, silR, silS, silE, xerD, spo0J, umuC, tnp, tnp, stbA		RegX3	2021-09-24	0.5103893941916249			soil	66077	China:Zhejiang	soil	linear	290000001	1199999999	China,Zhejiang	IncX1_1, EU370913, |IncR_1, DQ449578,		Gammaproteobacteria (1236)	Enterobacteriaceae (543)	Escherichia (561)	Escherichia fergusonii	Enterobacterales (91347)	Pseudomonadota (1224)	Escherichia_fergusonii (564)		Bacteria (2)	22360847	-0.50451934	GCF_020002285.1	49.8	MOBF	mobilizable	0	1
NZ_CP081002.1	1247975	63.5	6	0	6	1089	5	78	0	0	0	0	0	0	lysR, kdgD, lysR, ctaD, cyoC, yaaA, hlyD, cpaC, cpaB, tauA, ntrB, tauB, terC, pncA, xapX, lysR, glcG, mgtC, ligD, fghA, frmA, lysR, ilvD, lysR, lacI, maiA, arsB, speB, araC, cheY, lrp, katG, hutC, hutI, hutH, hutG, hutU, nikR, fixJ, ompW, eamA, hemN, dgcA, dgcN, lysR, dacB, gntR, nagA, dld, tenA, lysR, tetR, kduD, kduI, lacI, marR, ccoN, ccoO, ccoP, ccoG, fixH, fixI, ccoS, bluB, cobO, cobF, cobM,…	phoU	gntK, phoB, phoB, phoD	2023-06-17	0.6346801818946693			soil	1247975	China: Zibo	cell culture	circular	36819626	117980675	China,Zibo			Alphaproteobacteria (28211)	Sphingomonadaceae (41297)	Sphingobium (165695)	Sphingobium sp. V4	Sphingomonadales (204457)	Pseudomonadota (1224)	Sphingobium_sp._V4 (3038927)		Bacteria (2)	67857804	-37251308	GCF_029590555.1	65.1	MOBQ	mobilizable	1	4
NZ_CP081497.1	2808962	71.4	6	0	6	2442	4	234	0	0	0	0	0	0	trnP, irrE, paaX, gabP, capA, uvrA, uspA, egtD, egtC, egtB, egtA, alaA, deoR, lysX, Sernc350, Sernc350, xylB, mmuM, yceI, tesB, marR, novA, gntR, add, ssuD, yjbQ, casA, casB, cas7e, cas5e, cas6e, mutT, asnC, whiB, hicA, dnaB, virD4, virD4, mbtH, lysR, merR, asnC, bglX, cbiX, ung, mgtC, rihB, lacI, aph(6)-I, scbR, polX, lysR, tetR, lrp, lnt, fxsA, rbpA, ftsK, ligD, cspD, lacI, fabF, marR, salK, tu…		glpQ, phoD, phnF, purB, phoA, pyrG, RegX3, phoP, phoB, pps, ugpC, RegX3, spoT, nrdJ, ptsH, tmk, phoB, dut, phoP, phoP, pstB, phoB	2021-08-27	0.7141602485188479			plant soil	2808962	China:changsha	whole organism	linear	281979483	11297133	China,changsha			Actinomycetes (1760)	Streptomycetaceae (2062)	Streptomyces (1883)	Streptomyces sp. BHT-5-2	Kitasatosporales (85011)	Actinomycetota (201174)	Streptomyces_sp._BHT-5-2 (2866715)		Bacteria (2)	7.06564e+16	-31966336	GCF_019774615.1	72.0	non-mob	non-mob	0	22
NZ_CP081874.1	262462	32.8	0	0	0	240	6	28	0	1	0	0	0	0	abrB, carD, bsrC, marR, bsrC, rocF, citB, katE, ybjQ, tnpB, gerQA, gerQB, gerQC, arsR, gloA, arsB, arsC, tnp, lysE, modA, hisG, xerS, czcR, tnpB, ycgB, hfq, copG, merR, virB4, traM, ltrA, traM, traM, aimR, ftsK, tnpB, ftsN, hfq, hfq, arsR, tnpB		phoP	2022-02-12	0.3282875235272153	Environment		soil	262462	USA: Dallas, Texas		circular	3277580089999990	-9686903769485870	USA,Dallas,Texas			Bacilli (91061)	Bacillaceae (186817)	Bacillus (1386)	Bacillus toyonensis	Bacillales (1385)	Bacillota (1239)	Bacillus_toyonensis (155322)		Bacteria (2)	-2.31453e+16	-4688728299999990	GCF_022170805.1	35.4	MOBL	mobilizable	0	1
NZ_CP081879.1	184468	45.9	0	0	0	172	1	50	0	0	0	0	0	0	nlpD, spoIVCA, arsR, cadA, copD, copG, mngR, celB, manA, manA, mngA, mcrC, parB, copG, copG, pgmB, lacI, traM, virB4, copG, radC, iclR, hxlR, araJ, degV, tusA, ccdA, osmC, tlpA, copG		phoB	2022-02-12	0.4594889086454019	Environment		soil	184468	USA: Dallas, Texas		circular	3277580089999990	-9686903769485870	USA,Dallas,Texas			Bacilli (91061)		Exiguobacterium (33986)	Exiguobacterium acetylicum	Bacillales (1385)	Bacillota (1239)	Exiguobacterium_acetylicum (41170)		Bacteria (2)	67965393	33910887	GCF_022170825.1	46.8	MOBL	mobilizable	0	1
NZ_CP081988.1	1888955	61.9	0	0	0	1750	5	121	0	0	0	0	0	0	dctP, iclR, iclR, ugpC, dctP, dhaK, iclR, tctB, lacI, potA, purU, glnT, glxD, dadA, ureE, ureF, ureC, ureG, ureD, urtE, urtD, urtC, urtB, iclR, iclR, maoC, ydiF, lysR, livF, livG, livM, livH, argE, lysR, lysR, tetR, eutQ, ccmA, deoC, fecR, gntR, potA, lysR, lrp, betI, tauB, tauC, tauA, fadR, icd, hipA, hemL, glnA, aphA, copG, lldD, fba, ftsK, mnhG, mnhF, hyfB, mnhC, mnhB, phnN, phnE, phnE, phnD, …	ugpC, aphA, phnN, phnE, phnE, phnD, phnC, phnL, phnK, phnJ, phnI, phnH, phnG, phnF, ugpB, ugpE, ugpC, ugpE, ugpA, ugpB, ugpE, ugpA, ugpB, ugpC, ugpE, ugpA, ugpC, ugpE, ugpA, ugpB, ugpA, ugpE, pgtC, ugpB, ugpA, ugpE, ugpC, ugpA	phnN, phnM, phnE, phnE, phnC, phnL, phnK, phnJ, phnI, phnH, phnG, phnF, gnd, ugpC, phoB, ugpC, phoB, ugpC, ugpC, ugpC, ugpC, gntK, ugpC, phoP, ugpC, ugpC, pgtC, ugpC, ugpA, ugpC, ugpC, ugpC, ugpC, lysR, ugpC, ugpC	2022-04-22	0.6186478767360789			rhizosphere soil	1888955	China: Heilongjiang province	cell culture	circular	4.8e+16	127999992	China,Heilongjiang province			Alphaproteobacteria (28211)	Rhizobiaceae (82115)	Shinella (323620)	Shinella oryzae	Hyphomicrobiales (356)	Pseudomonadota (1224)	Shinella_oryzae (2871820)		Bacteria (2)	6719942	-4270714	GCF_023038235.1	64.0	MOBQ	mobilizable	38	36
NZ_CP082364.1	395960	41.5	16	0	3	367	2	68	0	0	0	0	0	0	ltaS, yhhN, eamA, brnQ, istA, istB, copG, copG, nlpC, virB4, prgI, gspF, cpaF, flaJ, istB, lysR, lysR, ybjD, pM0699, yozG, gp36, tnpW, spoIVCA, marR, tetR, phzF, ompR, pyc, gntR, sinR, phoB, yncA, thrS, brnQ, trnN, trnI, trnG, trnQ, trnH, trnY, trnF, trnD, trnA, trnR, trnG, trnL, trnK, trnT, trnV, trnE, rrf, rrl, rrs, istA, istB, copG, pxpB, iclR, arcD, kdpC, kdpB, kdpA, betB, hemA, yqzM, merR, l…	phoB	phoP, phoB	2021-09-24	0.415443479139307			soil	395960		bacterial cell	circular						Bacilli (91061)	Bacillaceae (186817)	Bacillus (1386)	Bacillus badius	Bacillales (1385)	Bacillota (1239)	Bacillus_badius (1455)		Bacteria (2)	-0.32396826	-46354413	GCF_020002245.1	44.2	MOBL	mobilizable	1	2
NZ_CP083456.1	446704	69.1	2	1	3	397	1	86	0	0	0	0	0	0	rrl, rrf, thuA, nagA, tetR, hicA, cheB, rraA, gntR, asnB, rfbC, lhgO, rfbF, mnmC, lacI, paaI, phzF, cbiD, cobI, cobM, cobK, recQ, cvpA, gntR, dinB, arsR, trnN, ssrA, dinB, parA, merR, trnR, prsW, hisJ, ydiU, insA, luxR, nhaA, lysR, map, dbpA, tnp, lacI, rhaD, rhaI, deoR, rhaS, flgM, topA, doxX, rrs		ugpA, ugpA	2021-10-07	0.6908780758623161			coastal dune soil	446704	South Korea: Taean	whole organism	circular	36843472	126192167				Deinococci (188787)	Deinococcaceae (183710)	Deinococcus (1298)	Deinococcus taeanensis	Deinococcales (118964)	Deinococcota (1297)	Deinococcus_taeanensis (2737050)		Bacteria (2)	7381556	-3.46622e+16	GCF_020229735.1	68.7	non-mob	non-mob	0	2
NZ_CP083458.1	421178	69.1	0	0	0	358	0	51	0	0	0	0	0	0	lysR, cydB, glpK, glf, lacI, hpaE, hpaB, hpaH, hpaI, arsC, pstS, pstC, pstA, pstB, araC, pfkB, gntR, gntR, tal, lacI, recA, tnp, yidD, pucL, uraH, marR, tnp, maoC, rsgA, nirB, nirD, merR, gntR, arsR, guaD, xdhC, xdhB, cotH, modA, modB, cobO, cobN, cbiB, cobU, kynU, trxC, copC, copD, tolC, tolC, hlyD, araA, lacI, nagA, parA, cphA, preA, hydA, pucR, rocD, allE, iclR, aceB, pfkB	pstS, pstC, pstA, pstB	pstS, pstC, pstA, pstB, ptsI	2021-10-07	0.69086229575144			coastal dune soil	421178	South Korea: Taean	whole organism	circular	36843472	126192167				Deinococci (188787)	Deinococcaceae (183710)	Deinococcus (1298)	Deinococcus taeanensis	Deinococcales (118964)	Deinococcota (1297)	Deinococcus_taeanensis (2737050)		Bacteria (2)	74123483	-3418175	GCF_020229735.1	68.7	non-mob	non-mob	4	5
NZ_CP083459.1	386169	65.7	0	0	0	390	4	146	0	0	0	0	0	0	marR, doxX, pptA, marR, marR, lacI, araC, merR, marR, lacI, fdhD, fdhF, dnaN, marR, dinB, lexA, merR, lexA, copZ, ridA, ridA		phoB	2021-10-07	0.6572200254292809			coastal dune soil	386169	South Korea: Taean	whole organism	circular	36843472	126192167				Deinococci (188787)	Deinococcaceae (183710)	Deinococcus (1298)	Deinococcus taeanensis	Deinococcales (118964)	Deinococcota (1297)	Deinococcus_taeanensis (2737050)		Bacteria (2)	73731856	-34354331	GCF_020229735.1	68.7	non-mob	non-mob	0	1
NZ_CP083953.1	494461	60.6	1	0	0	522	8	101	0	0	0	0	0	0	nikE, copG, traG, virB11, trbG, virB8, trbL, virB4, virB3, luxR, eamA, gntR, potA, traA, parB, ric, glp, narI, narJ, narH, narZ, nnrS, ubiX, ubiU, mog, nnrS, nosL, nosF, nosZ, hemN, pgm, tkt, pgi, tal, mucR, polX, pilZ, repC, ctRNA_p42d, repB, repA, scpB, capA, iclR, frmA, gfa, scpB, trnG, bioD, alc, allB, lysR, xerD, doxX, sbmA, doxX, abgB, ssuE, iclR, ridA, lysR, fsa, ctaD, lysR, rnk, fdxA, lys…	ugpC	ppa, gdh, ugpC	2021-09-20	0.6063875614052473			soil	494461	Australia: WA, Badgingarra	cell culture	circular	-303903774	1155021644	Australia,WA,Badgingarra			Alphaproteobacteria (28211)	Phyllobacteriaceae (69277)	Mesorhizobium (68287)	Mesorhizobium sp. B2-1-8	Hyphomicrobiales (356)	Pseudomonadota (1224)	Mesorhizobium_sp._B2-1-8 (2589967)		Bacteria (2)	67861667	-4475135	GCF_006442545.2	62.8	MOBQ	mobilizable	1	3
NZ_CP083955.1	460611	60.8	0	0	0	499	10	86	0	0	0	0	0	0	ridA, iclR, lysR, petA, luxR, Atu_At1, repC, ctRNA_p42d, repB, repA, lysR, araC, csbD, copG, mucR, traC, ardC, dinB, polX, ligD, xerD, traF, traG, copG, hipA, ehuB, lrp, aceE, pduX, cysK, thrC, luxR, lasI, ompR, ehuD, trbB, virB2, trbE, trbJ, trbK, trbL, trbF, trbG, traI, arcC, argF, arcD, mdaB, mgtC, trxC, uspA, hemA, fixJ, mgtA, ompR, nqrB, apbE, ccc1, nnrS, nosR, nosZ, nosD, copZ, ric, mogA, t…		phoB, phoB, phoP, gdh	2021-09-20	0.6076407206949029			soil	460611	Australia: WA, Badgingarra	cell culture	circular	-303903774	1155021644	Australia,WA,Badgingarra			Alphaproteobacteria (28211)	Phyllobacteriaceae (69277)	Mesorhizobium (68287)	Mesorhizobium sp. B2-1-1	Hyphomicrobiales (356)	Pseudomonadota (1224)	Mesorhizobium_sp._B2-1-1 (2589974)		Bacteria (2)	6878239999999990	-43094273	GCF_006442975.2	63.3	MOBQ	mobilizable	0	4
NZ_CP083957.1	494404	61.4	0	0	0	532	6	109	0	0	0	0	0	0	copG, degQ, ftsH, livK, pdxI, livG, livF, livH, livM, repA, repB, ctRNA_p42d, repC, scpB, gntR, ccmA, fabG, lysR, yhaN, gloA, vapC, lysR, hyuA, hyuB, yafY, lrp, lysR, nikE, dppC, dppB, ddpA, yigB, bioA, yigB, dadA, gabD, leuB, argE, xth, copG, parA, mobC, traA, ligD, mucR, virB11, virB4, virB3, tnp, vapC, dnaJ, potC, potB, potD, pfkB, gntR, pfkB, ugpE, lacI, copG, tnp, groL, groES, yebA, atzF, ch…	ugpE	ugpC	2021-09-20	0.6141212449737462			soil	494404	Australia: WA, Badgingarra	cell culture	circular	-303903774	1155021644	Australia,WA,Badgingarra			Alphaproteobacteria (28211)	Phyllobacteriaceae (69277)	Mesorhizobium (68287)	Mesorhizobium sp. B1-1-8	Hyphomicrobiales (356)	Pseudomonadota (1224)	Mesorhizobium_sp._B1-1-8 (2589976)		Bacteria (2)	68076406	-43148227	GCF_006442795.2	63.4	MOBQ	mobilizable	1	1
NZ_CP084399.1	160984	63.6	0	0	0	174	0	19	0	0	0	0	0	0	ardC, copG, copG, parA, tlpA, dsbA, lysR, cueR, dsbD, dsrE, cydB, lnt, spoIVCA, tnp, tetR, tnp, relB, yafQ, fixJ, fixJ, pcoB, sufI, rpoE, copC, copD, cadA, cueR, fixJ, prs, deoA, ySH1, sTE14, csgD, virD2, spo0J, parA, yncB, ssb, arsH, arsN2, arsB, arsC, wzb, arsR, xerD, ssb, parA, spo0J, xerD, spoIVCA, ctpA, soxR, czcD, cytC553, tolC, acrA, cusA, zupT, czcD, zntA, cof, pinE, pinE, tnp, tetR, tnp		phoB	2022-08-13	0.6364172837052129			soil	160984	China	cell culture	circular	344118455	860326902	China			Alphaproteobacteria (28211)	Sphingomonadaceae (41297)	Sphingobium (165695)	Sphingobium sp. CFD-1	Sphingomonadales (204457)	Pseudomonadota (1224)	Sphingobium_sp._CFD-1 (2878545)		Bacteria (2)	65955844	-35204895	GCF_024611115.1	62.4	MOBQ	mobilizable	0	1
NZ_CP084407.1	360439	61.8	0	0	0	366	3	89	0	0	0	0	0	0	gdhA, istB, istB, istA, istA, sulP, parD, higA, istA, istB, bcsD, tolC, hlyD, istB, istA, xerD, ardC, ubiC, pilZ, vapC, mscL, istB, istA, vapC, ssb, copG, mobF, insE, tnpB, mucR, istA, istB, lysR, prgI, hmpA, istB, istA, traG, traH, traF, traN, trbC, traU, traW, trbI, traC, traV, dsbC, traK, traE, traL, traA, istB, istA, araC, hipA, usg, groES, groL, higA, brnA, galU, mucR, wecC, wecB, capD, glmS…		ppdK, gcd, ppdK	2022-08-13	0.6175330638471419			soil	360439	China	cell culture	circular	344118455	860326902	China			Alphaproteobacteria (28211)	Sphingomonadaceae (41297)	Sphingobium (165695)	Sphingobium sp. CFD-2	Sphingomonadales (204457)	Pseudomonadota (1224)	Sphingobium_sp._CFD-2 (2878542)		Bacteria (2)	6576963	-3566702	GCF_024611135.1	64.3	MOBQ	mobilizable	0	3
NZ_CP084414.1	101450	55.0	0	0	0	121	2	47	0	0	0	0	0	0	parA, tnsA, lysR, oprD, ptrA, tolC, czcA, hicA, umuC, traN, dsbA, recT, copC, copD, ptrA, czcA, tolC, gmtX, gmtY		phoB, phoB, phoP	2021-10-13	0.5501429275505175			soil	101450	China:Guangzhou	mixed culture	circular	231301964	1132592945	China,Guangzhou			Gammaproteobacteria (1236)	Pseudomonadaceae (135621)	Pseudomonas (286)	Pseudomonas sp. HS-18	Pseudomonadales (72274)	Pseudomonadota (1224)	Pseudomonas_sp._HS-18 (2879114)		Bacteria (2)	48108234	-2620902	GCF_020401845.1	64.7	MOBH	mobilizable	0	3
NZ_CP084487.1	1681071	63.0	4	0	3	1468	1	42	0	0	0	0	0	0	pepCK, fabG, purR, livK, livG, livF, livH, livM, gstA, pcaH, qor, paaY, dAP2, acyC, yndB, uvrD, cysG, bfd, nirD, nirB, narK, tauA, amiR, hmpA, iscR, lrp, rhaT, acrA, acrB, acrR, araJ, frmR, gltP, ssuD, tauC, tauA, tauB, ssuD, petE, rpoE, ytcJ, lysR, nodU, sxtJ, comP, citB, tesA, dadA, citB, potC, potB, potA, potD, speB, mutK, acrR, acrA, acrB, rbsB, ddpA, dppB, dppD, dppD, chb, lysR, aldA, narK, …	ugpE, ugpA, ugpB, ugpE, ugpA, ugpB, phnP, ugpB, ugpA, ugpE, ugpA, ugpE, ugpB, ugpA, ugpE, ugpB, phnN, phnM, phnE, phnE, phnD, phnC, phnD, ugpE, ugpA, ugpB, phnF, phnG, phnH, phnI, phnJ, phnK, phnL, ugpE, ugpA, ugpB, ugpB, ugpA, ugpE, ugpB, ugpE, ugpA, ugpE, ugpB, ugpA, ugpE	pckG, phoB, phnN, phnM, phnE, phnE, phnD, phnC, phoB, ugpC, ugpE, ugpA, ugpB, phoB, phnG, phnH, phnI, phnJ, phnK, phnL, phoB, nrdE, nrdE, nrdF, phoB, phoB, gntK	2021-10-13	0.6299769611158601			soil	1681071	China: guangxi	cellculture	linear	24.0	109.0	China,guangxi			Alphaproteobacteria (28211)	Rhizobiaceae (82115)	Ensifer (106591)	Ensifer adhaerens	Hyphomicrobiales (356)	Pseudomonadota (1224)	Ensifer_adhaerens (106592)		Bacteria (2)	6817986500000000	-41703086	GCF_020405145.1	62.7	MOBQ	mobilizable	46	27
NZ_CP084488.1	1568420	60.7	4	0	3	1460	6	122	0	0	0	0	0	0	kynU, adhE, lysR, dapA, aspD, gGDEF, phnA, rbcL, tktA2, tktA1, mtnA, mtnK, mglA, araH, rbsB, rhaD, deoR, maoC, caiB, ugpB, iclR, ugpB, ugpA, ugpE, malK, rspA, rhaM, mviM, maoC, fabG, ycgM, rspA, molR, mutT, nhaP, suhB, ar15, araJ, suhB, cpdA, rpiR, nptA, purR, fbpB, malK, afuA, afuA, suhB, yjbI, corA, kup, araJ, rimL, tnpB, insE, lysR, yiaG, relE, nirK, nthA, nthB, gloB, lysR, yhcG, araC, cspC, r…	ugpB, ugpB, ugpA, ugpE, phoD, ugpB, ugpA, ugpE, ugpB, ugpE, phnY, ugpB, ugpE, ugpA, ugpB, ugpA, ugpE, ugpE, ugpA, ugpB, ugpB, ugpE, ugpA, ugpB, ugpA, ugpE, ugpC, ugpE, ugpA, ugpB, ugpC, ugpB, ugpA, ugpE, phnK, phnK	RegX3, pps, phoB, phny, phnA, phnW, phoR, ugpE, ugpC, ugpC, gnl, ugpC, ugpC, ugpC	2021-10-13	0.6069063133599418			soil	1568420	China: guangxi	cellculture	linear	24.0	109.0	China,guangxi			Alphaproteobacteria (28211)	Rhizobiaceae (82115)	Ensifer (106591)	Ensifer adhaerens	Hyphomicrobiales (356)	Pseudomonadota (1224)	Ensifer_adhaerens (106592)		Bacteria (2)	71003914	-4156413	GCF_020405145.1	62.7	MOBQ	mobilizable	36	14
NZ_CP084489.1	132389	59.7	0	0	0	142	0	31	0	0	0	0	0	0	hlyD, dsbA, mntR, copC, copD, emrA, petA, dsbA, copG, cusA, fixH, arsO, arsH, arsB, arsC, arsR, aioR, glp, arsK, phoB, phoB, phoU, pstB, pstA, pstC, phnC, phnD, phnE, phnE, repA, repB, ctRNA_p42d, repC, vapC, phd, copG, lysR, traA, lysR, ddpA	phoB, phoB, phoU, pstB, pstA, pstC, phnC, phnD, phnE, phnE	phoB, phoB, phoU, pstB, pstA, pstC, pstS, phnC, phnD, phnE, phnE	2021-10-13	0.5971568634856371			soil	132389	China: guangxi	cellculture	linear	24.0	109.0	China,guangxi			Alphaproteobacteria (28211)	Rhizobiaceae (82115)	Ensifer (106591)	Ensifer adhaerens	Hyphomicrobiales (356)	Pseudomonadota (1224)	Ensifer_adhaerens (106592)		Bacteria (2)	69518075	-4.1469e+16	GCF_020405145.1	62.7	MOBQ	mobilizable	10	11
NZ_CP084922.1	95483	37.5	0	0	0	97	0	15	0	2	0	0	1	0	tnp, brxL, pglZ, pglX, brxC, vbhA, tnp, ninB, hipA, uvrA, tnp, tnp, gldA, fghA, frmR		phoA	2021-10-21	0.3748415948388718			Groundwater from chloroethene-contaminated soil at chemical factory	95483	Czech Republic: Usti nad Labem		linear	50.65	14.02				Gammaproteobacteria (1236)	Moraxellaceae (468)	Acinetobacter (469)	Acinetobacter pittii	Moraxellales (2887326)	Pseudomonadota (1224)	Acinetobacter_pittii (48296)		Bacteria (2)	1.2311e+16	-8369433	GCF_020535225.1	38.9	non-mob	non-mob	0	1
NZ_CP085391.1	346731	35.6	0	0	0	356	8	69	0	0	0	0	0	0	lysE, istB, blaR1, istB, istA, hutH, hutP, ccsB, cadD, lspA, cysK, cadD, lpdA, cadA, lspA, istB, copZ, copZ, spoIIP, murE, lgt, solA, xerS, coiA, ccsB, prsA, cadA, copC, copD, qoxD, qoxC, qoxB, qoxA, ctaG, feoA, lgt, tetR, fixH, repB, nlpD, herA, prgI, copG, yhjD, ltrA, dnaN, sseB, ftsZ, traM, gspF, gspF, radC, ssb, ltrA, dnaA, hrcA, istB, istA, istB, istA		phoB, phoP, phoB, phoP, phoB, phoB	2022-06-23	0.3561319870447119			soil	346731	China	single cell	circular	344118455	860326902	China			Bacilli (91061)	Bacillaceae (186817)	Cytobacillus (2675230)	Cytobacillus firmus	Bacillales (1385)	Bacillota (1239)	Cytobacillus_firmus (1399)		Bacteria (2)	-16947433	-4813693	GCF_023823815.1	42.1	MOBL	mobilizable	0	6
NZ_CP085393.1	377383	35.6	0	0	0	419	5	81	0	0	0	0	0	0	tatA, lgt, feoA, ctaG, qoxA, qoxB, qoxC, qoxD, copD, copC, cadA, prsA, ccsB, darT, hutH, hutP, ccsB, cadD, lspA, cysK, cadD, lpdA, cadA, lspA, copZ, copZ, spoIIP, murE, lgt, yopX, trxB, ccdA, drsE, arsR, mutT, merR1, hrcA, ltrA, ltrA, ltrA, dnaA, ltrA, ssb, gspF, gspF, traM, ftsZ, sseB, dnaN, ltrA, copG, prgI, herA, nlpD, rpiR, menC, mutT, ubiE, spoIID, repB, marR, arsN1, merR, arsR, arsB, arsC, …		phoB, phoB, phoP, phoB, phoP, phoB	2022-06-23	0.356311757551347			soil	377383	China	single cell	circular	344118455	860326902	China			Bacilli (91061)	Bacillaceae (186817)	Cytobacillus (2675230)	Cytobacillus oceanisediminis	Bacillales (1385)	Bacillota (1239)	Cytobacillus_oceanisediminis (665099)		Bacteria (2)	-17312193	-4801279	GCF_023823835.1	41.3	MOBL	mobilizable	0	6
NZ_CP085403.1	296261	33.2	0	0	0	290	4	34	0	0	0	0	0	0	abrB, arsR, abc-f, tnp, spoIVCA, ydeE, gerAC, xerS, gshB, fghA, frmA, marR, araC, yfbU, ltrA, yndE, tnpB, ltrA, thsB1, thsA, thsB', xpaC, ant(6), tetR, rsfA, thiF, ltrA, fbpA, cdiI, dnaN, ltrA, tnp, cwlJ, ltrA, traG, tubZ, tubR, tnpB, tnp, cpaB, gspF, gspF, recU, yhfH, tnp, yicC, prgI, ltrA, traG, tnp		phoB	2022-06-23	0.3321429415279095			soil	296261	China	single cell	circular	344118455	860326902	China			Bacilli (91061)	Bacillaceae (186817)	Bacillus (1386)	Bacillus anthracis	Bacillales (1385)	Bacillota (1239)	Bacillus_anthracis (1392)		Bacteria (2)	-20610757	-4981562	GCF_023824055.1	35.4	MOBL	mobilizable	0	1
NZ_CP085407.1	530756	31.9	1	0	0	469	6	64	0	1	0	0	0	0	gerAC, gerAB, gerAA, tnpB, yycF, xerS, dsdA, qdoI, gntR, arsR, ygaZ, trmB, marR, hcaE, gerAC, arsR, tnpB, bsh, splB, splA, lrp, potE, yxdL, blaIII, copY, ethD, gadA, vanZ, vanS-Pt, vanR-A, umuC, tnpB, bsrC, cspD, ltrA, herA, prgI, tnp, arsR, gspF, gspF, cpaB, traM, traG, yobL, rsfA, yxeA, tolA, cynS, trnI, azlD, azlC, gntR, tnp, immA, xpaF1, ubiG, tnp, lytD, qdoI, cDA1, acrR, asnB, insQ, ygaD, yq…		phoB, spoT, gdh	2022-06-23	0.3194405715620737			soil	530756	China	single cell	circular	344118455	860326902	China			Bacilli (91061)	Bacillaceae (186817)	Bacillus (1386)	Bacillus bombysepticus	Bacillales (1385)	Bacillota (1239)	Bacillus_bombysepticus (658666)		Bacteria (2)	-27319257	-4521333	GCF_023824075.1	35.2	MOBL	mobilizable	0	3
NZ_CP085410.1	471554	33.2	0	0	0	430	9	81	0	1	0	0	0	0	tnpB, ltrA, nrdI, yjcZ, tnp, cyoE, ampC, fbpA, fbpA, dut, recU, tnpB, RAGATH-18, arpU, xerD, yvrH, hemA, eamA, sdaAB, czcR, tnp, tnp, acrR, araJ, tnp, ybjQ, papR, tnp, tnp, copG, jmjC, resD, tnp, tnp, copY, mgtE, nAGPA, xerS, yhcF, queH, ldcB, clfA, tnp, grsT, sfp, solG, dltA, ampC, tnp, hfq, bsrC, cspD, yajC, iolB, fba, iolE, iolD, iolA3, iolC, iolG, narK, purR, brxL, pglZ, pglX, brxC, mcrC, tnp…		dut, phoB, gnd, gntK	2022-06-23	0.3318517073336245			soil	471554	China	single cell	circular	344118455	860326902	China			Bacilli (91061)	Bacillaceae (186817)	Bacillus (1386)	Bacillus thuringiensis	Bacillales (1385)	Bacillota (1239)	Bacillus_thuringiensis (1428)		Bacteria (2)	-23083723	-46605754	GCF_023824095.1	35.3	MOBL	mobilizable	0	4
NZ_CP085414.1	286462	33.3	1	0	0	278	1	27	0	0	0	0	0	0	yicC, ltrA, prgI, herA, umuC, abrB, lacI, arsR, spoIVCA, ydeE, spoIVCA, tnp, istB, araC, yozG, cls, trnR, spoVAC, spoVAD, spoVAE, ycaP, clpP, frmA, fghA, gshB, gerAC, tnsA, tniQ, arsN1, arsB, arsC, arsD, arsA, xerS, hfq, bdbC2, ltrA, ltrA, thsB1, thsA, thsB', xpaC, ant(6), tetR, rsfA, cdiI, dnaN, ftsK, traG, tubZ, tubR, tnp, tnp, tnp, tnp, cpaB, gspF, gspF		phoB	2022-06-23	0.3326305059658873			soil	286462	China	single cell	circular	344118455	860326902	China			Bacilli (91061)	Bacillaceae (186817)	Bacillus (1386)	Bacillus paranthracis	Bacillales (1385)	Bacillota (1239)	Bacillus_paranthracis (2026186)		Bacteria (2)	-20174356	-5001945500000000	GCF_023824115.1	35.6	MOBL	mobilizable	0	1
NZ_CP085430.1	132108	34.0	0	0	0	159	7	33	0	0	0	0	0	0	lysE, sleB, hutH, hutG, hutI, hutU, merR, dinB, hxlR, copG, norA, merR, sASP-C4, lysR, spxA, yhfH, doxX, dinB, eamA, yndE, brnQ, abrB, tetR, luxE, nifU, dinB, lysR, yaiI, yxeA, lprI		phoA	2022-06-23	0.3397296151633512			soil	132108	China	single cell	circular	344118455	860326902	China			Bacilli (91061)	Bacillaceae (186817)	Priestia (2800373)	Priestia megaterium	Bacillales (1385)	Bacillota (1239)	Priestia_megaterium (1404)		Bacteria (2)	-0.7166092	-4742791	GCF_023824155.1	38.3	MOBL	mobilizable	0	1
NZ_CP085437.1	55036	33.9	0	0	0	60	2	15	0	0	0	0	0	0	mepB, padR, tetR, ltrA, merR, grpB		phoB	2022-06-23	0.3388872737844321			soil	55036	China	single cell	circular	344118455	860326902	China			Bacilli (91061)	Bacillaceae (186817)	Priestia (2800373)	Priestia megaterium	Bacillales (1385)	Bacillota (1239)	Priestia_megaterium (1404)		Bacteria (2)	-0.70907134	-472156	GCF_023824175.1	38.1	MOBL	mobilizable	0	1
NZ_CP085447.1	103394	35.9	0	0	0	98	2	20	0	0	0	0	0	0	solG, mobP2, copG, ltrA, abrB, map, rhtA, merR, grpB, ampC, ybfO, bla, blaI, blaR1, hsdR, abrB, gntR		phoB	2022-06-23	0.358782908099116			soil	103394	China	single cell	circular	344118455	860326902	China			Bacilli (91061)	Bacillaceae (186817)	Priestia (2800373)	Priestia megaterium	Bacillales (1385)	Bacillota (1239)	Priestia_megaterium (1404)		Bacteria (2)	-0.7814628	-47160463	GCF_023824195.1	38.1	MOBL	mobilizable	0	1
NZ_CP085449.1	73010	33.4	0	0	0	81	0	22	0	0	0	0	0	0	hxlR, merR, yxeA, terC, ftsW, mntP, corA, yitT, ltrA, padR, hxlR, marR, padR, dsbA, pqqD		phoA	2022-06-23	0.3335844404876044			soil	73010	China	single cell	circular	344118455	860326902	China			Bacilli (91061)	Bacillaceae (186817)	Priestia (2800373)	Priestia megaterium	Bacillales (1385)	Bacillota (1239)	Priestia_megaterium (1404)		Bacteria (2)	-0.6840021	-47297926	GCF_023824195.1	38.1	MOBL	mobilizable	0	1
NZ_CP085507.1	503267	32.6	1	0	0	473	9	75	0	0	0	0	0	0	tnpB, rhaT, lysR, ykuK, blaIII, yxdL, yajL, lrp, acrR, araJ, ltrA, yxdL, traX, tnp, colA, yxdL, resD, phzF, tnp, hcaE, ftsW, mgtE, nAGPA, copY, tetR, xerS, tnpA, gerAA, gerAB, gerAC, rfbF, wcaG, rfbG, tar, umuC, tnp, abc-f, dltA, dltA, marR, marR, yajC, rodA, iolB, fba, iolE, iolD, iolA3, iolC, iolG, narK, purR, tnpB, echA8, ubiG, radC, tnp, lmuB, trnV, yrpD, tnp, tnp, bhlA, yqbF, xkdF, arpU, fbp…		phoB, gnd, gntK	2021-10-25	0.326405267979025			soil from tomato plant roots	503267	Viet Nam: Hoai Duc, Ha Noi	soil sample	circular	2101903045	1.05712e+16	Viet Nam,Hoai Duc,Ha Noi			Bacilli (91061)	Bacillaceae (186817)	Bacillus (1386)	Bacillus cereus	Bacillales (1385)	Bacillota (1239)	Bacillus_cereus (1396)		Bacteria (2)	-2.38646e+16	-45924215	GCF_013284455.2	35.4	MOBL	mobilizable	0	3
NZ_CP085511.1	503267	32.6	1	0	0	473	9	76	0	0	0	0	0	0	umuC, tar, rfbG, wcaG, rfbF, gerAC, gerAB, gerAA, tnpA, xerS, tetR, copY, nAGPA, mgtE, ftsW, hcaE, tnp, phzF, resD, yxdL, colA, tnp, traX, yxdL, ltrA, araJ, acrR, lrp, yajL, yxdL, blaIII, ykuK, lysR, rhaT, tnpB, fbpA, spbB, tnp, tnp, lepB, traM, traM, dinB, menH, gntR, gntK, gntP, gndA, tcpC, merR, lagD, yjcZ, marR, lysM, ftsK, tnpB, rimL, rsfA, yxeA, arsR, fbpA, arpU, xkdF, yqbF, bhlA, tnp, tnp,…		phoB, gntK, gnd	2021-10-25	0.326405267979025			soil from tomato plant	503267	Viet Nam: Hoai Duc, Ha Noi	soil sample	circular	2101903045	1.05712e+16	Viet Nam,Hoai Duc,Ha Noi			Bacilli (91061)	Bacillaceae (186817)	Bacillus (1386)	Bacillus cereus	Bacillales (1385)	Bacillota (1239)	Bacillus_cereus (1396)		Bacteria (2)	-23710558	-4568133400000000	GCF_013284505.2	35.4	MOBL	mobilizable	0	3
NZ_CP085709.1	485313	37.1	0	0	0	466	3	83	0	1	0	0	0	0	araC, tetR, dinB, rpsN, ytcJ, pncA, ycaC, menH, doxX, yozG, yitT, marR, paiB, catA, arsR, dapA, lysR, asnB, msrA, msrB, dinB, lysR, yozE, gntP, csbD, yobV, yajL, yjjK, araC, copG, radC, priA, gntR, gntR, bglA, fabZ, phzF, lysE, manA, glcD, xerS, rbsK, lacI, copG, fadR, kdgD, gucD, tctB, blaR1, bla, tatC, oppF, bioY, fbp, osmC, doxX, rhtA, trxA, tetR, gntR, lpdA, ahpD, trxB, trxA, merR, yjzC, gerA…		phoA, phoB	2022-06-23	0.3713768227927131			soil	485313	China	single cell	circular	344118455	860326902	China			Bacilli (91061)	Bacillaceae (186817)	Bacillus (1386)	Bacillus sp. CMF21	Bacillales (1385)	Bacillota (1239)	Bacillus_sp._CMF21 (2884832)		Bacteria (2)	-18565184	-46940203	GCA_023823775.1	40.1	MOBL	mobilizable	0	2
NZ_CP085715.1	332908	34.7	0	0	0	351	0	120	0	0	0	0	0	0	padR, arpU, holA, dinB, coiA, bhlA, ytzI, tlpA, ywmB, lgt, ydhK, copZ, copZ, asnB, ccdA, merR, arsC, arsD, arsA, ytzI, ltrA, xerS, dsbA, copC, arsR, tatC, tatA, ywmB, prgI, ccsB, resB, cadD, lspA, lpdA, cadA, merA, merR1, merR, ltrA, ltrA, dnaN, grpB, yjcQ, tnsD, tnsA, traX, yozD		phoP	2022-06-23	0.3473722469871556			soil	332908	China	single cell	circular	344118455	860326902	China			Bacilli (91061)	Bacillaceae (186817)	Peribacillus (2675229)	Peribacillus asahii	Bacillales (1385)	Bacillota (1239)	Peribacillus_asahii (228899)		Bacteria (2)	-20423968	-5034762000000000	GCF_023823895.1	37.8	MOBL	mobilizable	0	1
NZ_CP086138.1	248585	60.6	1	0	0	276	3	61	0	0	0	0	0	0	tnpB, yecA, tnpB, yecA, ltrA, tnp, lysR, nopA, tnp, tnp, ltrA, tnp, tnp, tnp, trbI, trbH, trbG, trbF, trbL, trbJ, virB4, trbD, trbC, trbB, repA, repB, repC, tnpB, vapC, vapB, vapC, scpB, tnp, tnp, tnp, flgN, traD, traC, traA, traF, traB, traH, tnp, trnfM, luxR, tnp, tnp, tnp, istA, istB, tnp, tnpB, tnpB, yecA, metC, tnpB, tnp, istB, xerD, tnp, tnp, tnp, tnp, rfbB, rfbA, rfbD, tnpB, tnpB, yecA, tnp		ugpC	2021-11-01	0.6058289920952592	Glycine max cv. AC Orford		Root nodule from soybean plant inoculated with root zone soil from Amphicarpaea bracteata	248585	Canada: Quebec, Quebec	Cell Culture	circular	468137431	-712084061	Canada,Quebec,Quebec			Alphaproteobacteria (28211)	Nitrobacteraceae (41294)	Bradyrhizobium (374)	Bradyrhizobium barranii	Hyphomicrobiales (356)	Pseudomonadota (1224)	Bradyrhizobium_barranii (2992140)		Bacteria (2)	72612686	-4.82254e+16	GCF_017565645.3	63.3	MOBQ	mobilizable	0	1
NZ_CP086233.1	1795699	71.9	0	0	0	1513	0	249	0	0	0	0	0	0	thiI, thiI, prpB, araC, sufS, luxR, arsR, tnpA, eccB, eccD, eccCa, spoVK, cspC, tetR, tetR, pimR, araC, nepR, omdA, yobV, traR, whiB, traB, traA, panD, sbnA, sbnB, sbnB, sbnA, mbtH, mbtB, ampD, sseB, tnsA, mcjB, pqqD, pip, spcT, afsR, lmbE, lgt, alsR, djlA, iclR, cdiI, padR, arsR2, thiS, hbmL, tcmR, mgt, wbbJ, lanL, pip, djlA, nmrA, lysM, glpP, lepB, mauE, rox, ahpD, uspA, mtrY, ccmA, degT, djlA,…		pit, phoB, phoB, phoB	2023-02-23	0.718506275272192			soil	1795699	Unknown	whole organism	linear						Actinomycetes (1760)	Streptomycetaceae (2062)	Streptomyces (1883)	Streptomyces clavuligerus	Kitasatosporales (85011)	Actinomycetota (201174)	Streptomyces_clavuligerus (1901)		Bacteria (2)	7748069999999990	-26111538	GCF_028752555.1	72.7	non-mob	non-mob	0	4
NZ_CP086725.1	230544	51.6	0	0	0	228	0	16	0	3	0	0	1	0	xerD, gAF, tnp, yjcC, vagC, vapC, silE, silS, silR, silC, cusF, silB, silA, copG, silP, nlpD, pcoA, pcoB, pcoC, pcoD, pcoR, pcoS, pcoE, ydfA, ydeA, tnp, hutF, hutC, hutD, proX, proW, hutU, hutI, hutG, phnO, betT, arsR, arsD, arsA, arsB, arsC, gcvA, fecI, fecR, fecA, fecB, fecC, fecD, fecE, tnpB, tnp, qor, lacI, lacZ, lacY, tnp, insB, tnp, tnp, tnp, tnp, insE, tnp, aac(3)-IIe, tnp, catB3, blaOXA-1…	phnO	RegX3, phoB	2021-11-24	0.5155588521063225			soil/stream/plastic litter	230544	Tanzania: Zanzibar		circular	-609994425	3932094431715260	Tanzania,Zanzibar	IncFIB(K)_1, JN233704, |IncFII(K)_1, CP000648,	IncF RST(F-:A-:B-):FIA(-);FIB(-);FIC(-);FII(-);FIIK(5?);FIIS(-);FIIY(-)	Gammaproteobacteria (1236)	Enterobacteriaceae (543)	Klebsiella (570)	Klebsiella pneumoniae	Enterobacterales (91347)	Pseudomonadota (1224)	Klebsiella_pneumoniae (573)		Bacteria (2)	-0.69167465	39917052	GCF_020906545.1	57.4	MOBF	mobilizable	1	2
NZ_CP087141.1	350513	48.9	0	0	0	386	9	98	0	0	0	0	0	0	hxlR, hxlR, yhaK, yceI, tdh, yvrE, uvrA, phnN, parA, gntR, yrbE, thuA, araC, fecR, iclR, rbsK, pilT, tonB, araC, araC, ridA, nmrA, xynB2, araC, pqaA, ridA, crp, fabG, aes, padR, araC, araC, padR, araC, osmC, dinB, tpx, mutK	phnN	phnN	2021-12-13	0.4891601738023982	Brassica napus		rhizosphere soil	350513	South Korea:Daegu	single cell	circular	358494916	1285599518	South Korea,Daegu			Cytophagia (768503)	Cytophagaceae (89373)	Spirosoma (107)	Spirosoma sp. KNUC1025	Cytophagales (768507)	Bacteroidota (976)	Spirosoma_sp._KNUC1025 (2894082)		Bacteria (2)	11906347	-1.3816e+16	GCF_045160025.1	48.4	MOBB	mobilizable	1	1
NZ_CP087599.1	671525	68.5	0	0	0	594	1	25	0	0	0	0	0	0	dadA, lysR, lysR, proX, proV, gtrA, iclR, atoD, atoA, pcaF, gntR, glxA, gntR, phnF, phnG, phnH, phnI, phnJ, phnK, phnL, phnN, phnM, yciW, rpoE, rbsB, araH, mglA, mviM, ycjR, purR, dctA, atoC, gloA, betA, minE, minD, minC, rutG, ssuD, glcF, glcD, glcD, tctC, tctA, tctB, tctC, atoC, codB, hyuA, hyuB, araC, caiB, caiA, lysR, gabT, hipB, adhE, lacI, livF, livG, livM, livH, livK, gndA, lysR, lacI, acc…	phnF, phnG, phnH, phnI, phnJ, phnK, phnL, phnN, phnM, phoX, phnE, phnE, phnD, phnC	phnF, phnG, phnH, phnI, phnJ, phnK, phnL, phnN, phnN, phnM, gnd, ppk, phoX, phoP, ppc, ppc, phnE, phnE, phnC	2021-11-28	0.6845195636796843			soil	671525	China	cell culture	circular	344118455	860326902	China			Alphaproteobacteria (28211)	Paracoccaceae (31989)	Paracoccus (265)	Paracoccus sp. MA	Rhodobacterales (204455)	Pseudomonadota (1224)	Paracoccus_sp._MA (2895796)		Bacteria (2)	7367755000000000	-38757548	GCF_020990385.1	68.1	non-mob	non-mob	14	19
NZ_CP088023.1	187265	61.5	0	0	0	181	2	37	0	0	0	0	0	0	istB, istA, dcd, vapC, traH, traF, traA, tnp, yecA, tnp, tnpB, ltrA, tnpB, tnp, ppx, piuB, tnp, copG, istA, istB, htpG, hepA, recD, mazF, vapB, vapC, repC, repB, repA, trbB, trbC, trbD, virB4, trbJ, trbL, virB5, trbG, trbH, trbI, tnp, queD, sRAP, istB, istA, tnpB		ppk	2021-11-29	0.6154486956986089	Glycine max cv. AC Glengarry		Root nodule from soybean plant inoculated with root zone soil from Amphicarpa bracteata	187265	Canada: Gatineau, Quebec	Cell culture	circular	454222633	-757390982	Canada,Gatineau,Quebec			Alphaproteobacteria (28211)	Nitrobacteraceae (41294)	Bradyrhizobium (374)	Bradyrhizobium quebecense	Hyphomicrobiales (356)	Pseudomonadota (1224)	Bradyrhizobium_quebecense (2748629)		Bacteria (2)	71831956	-47358027	GCF_013373795.3	63.9	MOBQ	mobilizable	0	1
NZ_CP088024.1	132761	60.7	0	0	0	153	3	43	0	0	0	0	0	0	tnpB, tnpC, yecA, tnpB, tnp, repC, virD4, csa3, virB11, virB3, tnpB, tnp, scpB, vapC, repC, repB, repA, traI, trbB, trbD, virB4, trbJ, trbK, istB, istA, vapC, traH, traF, traA, traD, traG, copG, tnpB, virD1, virC2, tnpB, tnp, tnp, tnpB, tnpC, tnpB, tnp, tnpB, tnpB		phnL	2021-11-29	0.6065862715707173	Glycine max cv. AC Glengarry		Root nodule from soybean plant inoculated with root zone soil from Amphicarpa bracteata	132761	Canada: Gatineau, Quebec	Cell culture	circular	454222633	-757390982	Canada,Gatineau,Quebec			Alphaproteobacteria (28211)	Nitrobacteraceae (41294)	Bradyrhizobium (374)	Bradyrhizobium quebecense	Hyphomicrobiales (356)	Pseudomonadota (1224)	Bradyrhizobium_quebecense (2748629)		Bacteria (2)	72036023	-47146792	GCF_013373795.3	63.9	MOBQ	mobilizable	0	1
NZ_CP088910.1	188969	61.5	0	0	0	202	2	52	0	0	0	0	0	0	arsA, arsD, trxB, htpX, arsB, aseR, merR, arsR, arsR, cadA, cadA, tlpA, arsR, phoU, ccsB, mgtE, tlpA, resB, lnt, copC, ctaD, lspA, ftsK, lysM, copG, parA, copG	phoU	phoP, phoU	2021-12-13	0.6146828315755495			forest soil	188969	Russia: Pushchino	cell culture	linear	548347213	376139685	Russia,Pushchino			Actinomycetes (1760)	Nocardiaceae (85025)	Rhodococcus (1827)	Rhodococcus qingshengii	Mycobacteriales (85007)	Actinomycetota (201174)	Rhodococcus_qingshengii (334542)		Bacteria (2)	7240821400000000	-24343348	GCF_021165975.1	62.4	non-mob	non-mob	1	2
NZ_CP089920.1	722843	53.7	0	0	0	630	1	34	0	1	0	0	0	0	lysR, pagP, aglD2, clsB, elsH, iraM, araC, mntP, tssB, tssC, hcp, tssF, tssG, vgrG, pAAR, tssA, tssK, impK, impL, tssH, kup, hisM, ehuA, fucP, mntR, znuA, znuC, znuB, znuB, expR, eagI, mtr, yhaK, araJ, tetR, tolC, lapB, hlyD, fumA, dcuR, citA, rcnB, fabG, pTR2, rpiR, fhuE, arsC, arsB, lysR, tnp, tnpB, insE, yddW, fhuE, papD, treF, otsA, otsB, melB, pgpB, gldA, rbsB, rhaT, araJ, dapA, srfA, srfB, …	gcd, gcd, pstS	phoN, ugpC, gcd, RegX3, pstS	2021-12-24	0.5365743321855506			soil	722843	China: Guangxi	single cell	circular	24.0	109.0	China,Guangxi			Gammaproteobacteria (1236)	Yersiniaceae (1903411)	Rahnella (34037)	Rahnella victoriana	Enterobacterales (91347)	Pseudomonadota (1224)	Rahnella_victoriana (1510570)		Bacteria (2)	2.76115e+16	0.43072307	GCF_021276285.1	53.6	MOBF	mobilizable	3	5
NZ_CP090082.1	448451	34.2	2	0	0	425	16	105	0	0	0	0	0	0	repB, degT, recU, recU, marR, lepB, lolD, orfB, xhlA, tnp, tnp, lepB, wcaG, rfbG, rfbF, trnI, tnp, tnp, RAGATH-18, murQ, tnpA, orfB, bclA, tnpA, orfB, trnI, tnpR, abrB, hfq, arsR, tnp, tnp, lolD, abrB, lepB, fliB, tnp, tnp, ltrA, sdrD, mobL, mobP2, copG, merR, fliB, tnp, tnp, ftsN, acrB, abrB, merR, ftsZ, traM, merR, RAGATH-18, orfB, terC, yqbF, orfA, hoxN, ureA, ureC, 5_ureB_sRNA, ureE, ureF, ur…		phoB, RegX3	2022-01-11	0.3419838510784901			Contaminated soil sample CPT56DS-C from Oak Ridge Reservation Area 3	448451	USA: Tennessee, Oak Ridge Reservation (ORR)	cell culture	circular	35977268	-8427335				Bacilli (91061)	Bacillaceae (186817)	Bacillus (1386)	Bacillus cereus	Bacillales (1385)	Bacillota (1239)	Bacillus_cereus (1396)		Bacteria (2)	-2.3787e+16	-5063353	GCF_021391515.1	35.5	MOBL	mobilizable	0	2
NZ_CP090087.1	70091	35.5	1	0	0	79	0	18	0	0	0	0	0	0	tnpI, aimR, fbpA, tnp, trnI, tnp, tnp, sulP, speG		phoA, ppk	2022-01-11	0.3548244425104507			Contaminated soil sample CPT56DS-C from Oak Ridge Reservation Area 3	70091	USA: Tennessee, Oak Ridge Reservation (ORR)	cell culture	circular	35977268	-8427335				Bacilli (91061)	Bacillaceae (186817)	Bacillus (1386)	Bacillus cereus	Bacillales (1385)	Bacillota (1239)	Bacillus_cereus (1396)		Bacteria (2)	-24036384	-5091839	GCF_021391515.1	35.5	MOBL	mobilizable	0	2
NZ_CP090350.1	456912	70.7	0	1	3	448	2	50	0	0	0	0	0	0	luxR, marR, arsR, fecR, lysR, sorB, gntR, uxaA, tetR, rnhA, lldD, livH, msrA, ssrA, mtbC1, copG, lprI, cspA, copL, cusA, modE, fdhF, nuoE, mobB, glp, tetR, arsR, tetR, araC, uraH, uraD, lysR, pbuX, iclR, ygiQ, hxlR, ssuD, pyrC, gntR, pxpB, gntR, marR, livH, livG, luxR, lysR, lysR, ncs1, uraH, uraH, uraD, hxlR, soxC, vapC, tetR, tetR, luxR, kefC, rrs, rrl, rrf, repC, tonB, lysR, aspA, lysR, psiF, …		ugpC	2022-01-12	0.7071252232377351			soil	456912	South Korea	single cell	circular	365581914	1279408564	South Korea			Alphaproteobacteria (28211)	Methylobacteriaceae (119045)	Methylobacterium (407)	Methylobacterium oryzae	Hyphomicrobiales (356)	Pseudomonadota (1224)	Methylobacterium_oryzae (334852)		Bacteria (2)	71434813	-3.78676e+16	GCF_021398735.1	71.3	non-mob	non-mob	0	1
NZ_CP090580.1	657971	69.1	1	1	6	619	3	95	0	0	0	0	0	0	insO, fecR, insH, yqiC, mucR, thiF, tnsA, tniQ, uxaA, gntR, lysR, luxR, fecR, gntR, oxlT, zapB, cotJC, gntR, lysR, repB, repA, repC, copG, rrf, rrl, rrs, CC2171, umuD, tdh, perM, mauE, ctaD, nnrS, nrfD, htpG, hxlR, ygiQ, iclR, pbuX, lysR, uraD, uraH, araC, ureE, ureF, ureB, ureC, ureG, ureD2, urtA, glp, mobB, nuoE, fdhF, modE, tnp, tnp, marR, selB, lysR, glxA, solA, ehuA, lysR, lysR, vapC, tnp, k…		ugpC	2022-01-17	0.6906170636699793			Urban soil	657971	Hong Kong: Pokfulam	Pure isolate	circular	22264947	114129823				Alphaproteobacteria (28211)	Methylobacteriaceae (119045)	Methylobacterium (407)	Methylobacterium radiotolerans	Hyphomicrobiales (356)	Pseudomonadota (1224)	Methylobacterium_radiotolerans (31998)		Bacteria (2)	70102	-37376258	GCF_021484845.1	71.5	non-mob	non-mob	0	1
NZ_CP090583.1	48551	66.0	0	0	0	67	0	16	0	0	0	0	0	0	vapC, lysR, arsR, lysR, dsbA, tnp, tnp, arsR, merR, merT, tspO, mobF		ppa	2022-01-17	0.6598422277604993			Urban soil	48551	Hong Kong: Pokfulam	Pure isolate	circular	22264947	114129823				Alphaproteobacteria (28211)	Methylobacteriaceae (119045)	Methylobacterium (407)	Methylobacterium radiotolerans	Hyphomicrobiales (356)	Pseudomonadota (1224)	Methylobacterium_radiotolerans (31998)		Bacteria (2)	6925733599999990	-35600674	GCF_021484845.1	71.5	non-mob	non-mob	0	1
NZ_CP092103.1	337428	61.2	0	0	0	352	4	66	0	0	0	0	0	0	frmA, arsA, arsD, trxB, htpX, arsB, aseR, merR, arsR, cadA, lspA, csoR, resB, lnt, copC, cadA, cadA, tnp, arsR, phoU, ccsB, tlpA, tlpA, resB, lnt, copC, ctaD, lspA, arsR, mazF3, flgM, praB, aurF, tnp, lysR, tetR, lapA, tnsC, tniB, tniQ, crcB, fluC, eno, nsrR, ctaD, luxR, tnp, marR, irrE, mepM, ftsK, parA, copG, mcrC, maoC, fabG, paaJ, tetR, kstR2, padR, fdhA, gntR, terD	phoU	phoP, phoU, gdh	2022-02-10	0.6119379541709639			petroleum-contaminated soil, Western Siberia	337428	Russia: Western Siberia	soil	linear	62.0	76.0	Russia,West Siberia			Actinomycetes (1760)	Nocardiaceae (85025)	Rhodococcus (1827)	Rhodococcus qingshengii	Mycobacteriales (85007)	Actinomycetota (201174)	Rhodococcus_qingshengii (334542)		Bacteria (2)	72408714	-24481375	GCF_016722835.1	62.5	non-mob	non-mob	1	3
NZ_CP092189.1	310944	64.3	0	0	0	272	4	34	0	0	0	0	0	0	nagZ, murQ, gntR, sigA, thuA, lacI, gntR, allB, iclR, capD, pglC, asnB, ugpE, nagZ, gltB, ydcF, sugE, rpiR, nagA, gabT, spdH, eutC, dinB, lysM, tetR, ethD, msrP, msrQ, vcbS, meaB, ydbM, fetB, pta, bshC, parA, aceB, pilX, allE, guaD, xdhC, xdhB, pucL, lacI, lacI	ugpE	ugpE	2022-02-21	0.6433023309663476	Setaria viridis		rhizospheric soil	310944	South Korea: Daegu	cell culture	circular	358494916	1285599518	South Korea,Daegu			Deinococci (188787)	Deinococcaceae (183710)	Deinococcus (1298)	Deinococcus sp. KNUC1210	Deinococcales (118964)	Deinococcota (1297)	Deinococcus_sp._KNUC1210 (2917691)		Bacteria (2)	7449561999999990	-34117017	GCF_022344005.1	64.5	non-mob	non-mob	1	1
NZ_CP092192.1	268139	64.5	0	0	0	246	5	33	0	0	0	0	0	0	lacI, terE, modB, modA, tetR, copZ, mdlC, dgoD, marR, hxlR, cydB, parA, stiP, stiP, merR, tal, padR, ligA, lacI, crcB, tetR, pprA, corA, capA, urtE, urtD, urtC, urtB, urtA, araA, nirD		pit, phoB	2022-02-21	0.6453555805011579	Setaria viridis		rhizospheric soil	268139	South Korea: Daegu	cell culture	circular	358494916	1285599518	South Korea,Daegu			Deinococci (188787)	Deinococcaceae (183710)	Deinococcus (1298)	Deinococcus sp. KNUC1210	Deinococcales (118964)	Deinococcota (1297)	Deinococcus_sp._KNUC1210 (2917691)		Bacteria (2)	7568474	-3177992	GCF_022344005.1	64.5	non-mob	non-mob	0	2
NZ_CP092194.1	430672	63.8	1	0	0	388	6	82	0	0	0	0	0	0	yafY, dkgB, nadE, cphA, dinB, tetR, opcA, terD, terB, trnA, dinB, queF, queC, hisD, algF, glgX, marR, tetR, msnO8, nrdI, nrdE, merR, algJ, algF, lacI, parB, topA, parB, gsiA, iclR, opp4C, iclR, hutU, hutI, hutH, ugpE, glf, wbaP, exoP, yjiB, azlD, azlC	ugpE	nrdE, nrdF, ugpB, ugpE	2022-02-21	0.6382699595051454	Setaria viridis		rhizospheric soil	430672	South Korea: Daegu	cell culture	circular	358494916	1285599518	South Korea,Daegu			Deinococci (188787)	Deinococcaceae (183710)	Deinococcus (1298)	Deinococcus sp. KNUC1210	Deinococcales (118964)	Deinococcota (1297)	Deinococcus_sp._KNUC1210 (2917691)		Bacteria (2)	7513664	-34595013	GCF_022344005.1	64.5	non-mob	non-mob	1	4
NZ_CP092834.1	370292	33.2	0	0	0	384	15	42	0	0	0	0	0	0	qdoI, cDA1, yobV, yajL, dnaJ, murG, yobL, gerPF, brnQ, asnB, czcR, ahpD, splA, splB, tnpB, xerS, mphM, mutT, xRE, czcR, lolD, vanR, recU, ycgB, tnpB, iadA, mmuP, mmuM, ltrA, xpaF1, tnpB, sbnB, ridA, lysA, uvrA, uvrB, ypdA, sbnA, tnp, tnp, tar, bglC, arsA, arsD, arsC, arsB, arsN1, tnp, yjcZ, bsrC, ydeB, sspA, proW, tnpA, yxeA, rsfA, tnp, ftsK, umuC, colA, yfkO, merR, tnpB, tnpB, fadR, aimR, traM, …		phoB	2022-03-11	0.3316382746589178			soil	370292	China	whole organism	circular	344118455	860326902	China			Bacilli (91061)	Bacillaceae (186817)	Bacillus (1386)	Bacillus mycoides	Bacillales (1385)	Bacillota (1239)	Bacillus_mycoides (1405)		Bacteria (2)	-2158851	-45932136	GCF_022532085.1	35.5	MOBL	mobilizable	0	1
NZ_CP092894.1	233332	58.3	0	0	0	231	0	28	0	0	0	0	0	0	adhP, lysR, lysR, tniQ, repB, parB, arsK, arsH, arsC, arsB, arsN2, arsR, lysR, repA, repB, ctRNA_p42d, repC, avhB2, virB3, virB4, virB5, eexN, virB6, avhB7, virB8, virB9, virB11, vapC, traG, traD, traC, traA, gntR, araC, tnp, tnp, gabD, tetR, merR, folD, purU, fixA, gntR, ridA, tnp, tnp, lysR, lysR, purU, glyA2, fadH2, soxD, dadA, glxA, gntR, dapA, adhE, proX, proV, proW, proW		ugpC	2022-04-02	0.5830104743455677			soil	233332	China	soil	circular	344118455	860326902	China			Alphaproteobacteria (28211)	Rhizobiaceae (82115)	Agrobacterium (357)	Agrobacterium tumefaciens	Hyphomicrobiales (356)	Pseudomonadota (1224)	Agrobacterium_tumefaciens (358)		Bacteria (2)	6463476999999990	-5202205	GCF_022760295.1	59.6	MOBQ	mobilizable	0	1
NZ_CP092970.1	204886	60.3	0	0	0	242	1	59	0	0	0	0	0	0	repA, repB, ctRNA_p42d, repC, scpB, mdlC, marR, hypA, nifU, hypF, hypD, hypE, hypB, araC, suhB, matE, mbnC, mbnB, fecR, tnpB, tniQ, fadR, tnpB, tnpB, parA, mobC, virB11, virB9, virB8, virB7, eexN, virB5, virB4, virB3, avhB2, mucR		phoB	2023-01-12	0.6027742256669563			Mud, soil or sediment	204886	United Kingdom: Also possible Americas, Africa or Europe	Bacterial Monoculture	circular	5470235450000000	-32765753	United Kingdom			Alphaproteobacteria (28211)	Methylocystaceae (31993)	Methylocystis (133)	Methylocystis parvus OBBP	Hyphomicrobiales (356)	Pseudomonadota (1224)	Methylocystis_parvus (134)	Methylocystis_parvus_OBBP (1134912)	Bacteria (2)	6708761999999990	-38588052	GCF_027571405.1	63.7	MOBQ	mobilizable	0	1
NZ_CP093277.1	167204	51.5	0	0	0	185	0	16	0	2	0	0	0	0	spoIVCA, lptB, tnp, hutG, hutI, hutU, proV, proV, proW, hutD, hutC, hutF, insB, gcvA, lacI, lacZ, lacY, tnp, tnp, traX, traI, traD, traT, traS, traG, traH, trbF, trbB, traQ, traF, trbE, traN, trbC, traU, traW, trbI, traC, yfiB, traV, traB, traK, traE, traL, traA, traY, traJ, finP, traM, higA, yadA, sok, psiB, ydaB, ttdB, ttdA, rhmT, arsH, arsR, arsB, arsC, areA, ychA, yhdJ, dinP, sopA, xerD, bcsF…	phnO	phoH, RegX3, phoB	2022-03-19	0.5154362335829287	straw		soil sample from experimental farm at Northeast Agricultural University	167204	China: Harbin	soil sample	circular	457656666	1266160584	China,Harbin	IncFIB(K)_1, JN233704,	IncF RST(F-:A-:B-):FIA(-);FIB(-);FIC(-);FII(-);FIIK(-);FIIS(-);FIIY(-)	Gammaproteobacteria (1236)	Enterobacteriaceae (543)	Raoultella (160674)	Raoultella sp. HC6	Enterobacterales (91347)	Pseudomonadota (1224)	Raoultella_sp._HC6 (2923366)		Bacteria (2)	0.42683953	23142254	GCF_022605325.1	57.6	MOBF	mobilizable	1	3
NZ_CP093327.1	161452	62.9	0	0	0	174	0	43	0	0	0	0	0	0	phnJ, phnI, phnH, phnG, phnF, phnE, phnC, parA, marR, copG, parA, trbC, virD4, dctP, iclR, araC, mobC, iclR, accB, accC, lacI, bioY, yjzC, sdpI, tetR	phnJ, phnI, phnH, phnG, phnF, phnE, phnC	phnK, phnJ	2022-03-22	0.6286388524143398			grassland soil	161452	Germany: exploratory Schorfheide-Chorin	whole organism	circular	5300853295	1.37672e+16	Germany, Brandenburg,Biosphaerenreservat Schorfheide Chorin			Actinomycetes (1760)	Micrococcaceae (1268)	Arthrobacter (1663)	Arthrobacter sulfonylureivorans	Micrococcales (85006)	Actinomycetota (201174)	Arthrobacter_sulfonylureivorans (2486855)		Bacteria (2)	65699697	-26120827	GCF_022637435.1	66.0	non-mob	non-mob	7	2
NZ_CP093330.1	562130	52.0	0	0	0	543	2	36	0	1	0	0	0	0	pqiC, padR, acrA, acrB, tolC, msrB, bamA, rbsK, ptsG2, sacC, purR, dppD, gsiA, ddpA, dppC, marR, dppF, dppD, dppC, dppB, ddpA, rspA, exoX, lysR, araJ, yobV, gloA, fabG, araC, lpxA, gcd, pqqU, menH, impA, vgrG, lutC, aldA, rhaS, rhaS, xylG, araH, araH, panE, hcp, cybB, hns, lysR, adhE, ulaA, tM2, fabV, dmsC, dmsB, bisC, araJ, gntR, gGDEF, argD, srkA, fabG, potC, potB, potD, gabT, aRO8, potA, parA,…	gcd, gcd	gcd, ugpC, phoN, RegX3	2022-03-22	0.5195275114297404			grassland soil	562130	Germany: exploratory Schorfheide-Chorin	whole organism	circular	5300853295	1.37672e+16	Germany, Brandenburg,Biosphaerenreservat Schorfheide Chorin			Gammaproteobacteria (1236)	Yersiniaceae (1903411)	Rahnella (34037)	Rahnella aceris	Enterobacterales (91347)	Pseudomonadota (1224)	Rahnella_aceris (2703885)		Bacteria (2)	27470865	0.4454212999999999	GCF_022637475.1	52.5	MOBF	mobilizable	2	4
NZ_CP093338.1	892686	61.1	0	0	0	815	0	33	0	0	0	0	0	0	fba, ftsK, mnhG, mnhF, hyfB, mnhC, mnhB, phnN, phnE, phnE, phnD, phnC, wbbJ, phnL, phnK, phnJ, fosX, phnI, phnH, phnG, phnF, glxA, putA, gumC, yitH, pncB, ytfQ, ytfR, yjfF, gph, lpdA, ugpB, ugpE, tpiA, lipA, xylB, glpD, fecR, eamA, rspA, fabG, iclR, gcvA, fadH, acrR, minC, minD, minE, eamA, potC, potB, potA, potD, fabG, gntR, ynbB, ppk2, ssuD, sfnB, mET17, tauC, tauA, ssuD, deoR, rbsB, araH, ccmA…	phnN, phnE, phnE, phnD, phnC, phnL, phnK, phnJ, phnI, phnH, phnG, phnF, ugpB, ugpE, ugpC, ugpE, ugpA, ugpB, ugpE, ugpA, ugpB, ugpC, ugpE, ugpA, aphA	phnN, phnM, phnE, phnE, phnC, phnL, phnK, phnJ, phnI, phnH, phnG, phnF, gnd, ugpC, phoB, ugpC, phoB, ugpC, ugpC, ugpC, ugpC	2022-03-22	0.6108978969088795			grassland soil	892686	Germany: exploratory Hainich	whole organism	circular	5.10811e+16	104584642	Germany,exploratory Hainich			Alphaproteobacteria (28211)	Rhizobiaceae (82115)	Shinella (323620)	Shinella sp. H4-D48	Hyphomicrobiales (356)	Pseudomonadota (1224)	Shinella_sp._H4-D48 (2925841)		Bacteria (2)	6735213000000000	-42274265	GCF_022637395.1	62.8	MOBQ	mobilizable	25	21
NZ_CP093339.1	396096	62.3	0	0	0	343	0	7	0	0	0	0	0	0	urtE, urtD, urtC, urtB, lysR, terB, doeA, dedA, lysR, atoC, rbsB, araH, deoR, fbaB, cheW, cheW, cheA, ompR, gltP, bioA, lysR, dadA, alr, lrp, yjbE, acrB, lysR, mprF, ar15, hipA, repA, repB, repC, ssuD, caiA, nirB, nirD, cysG, araC, mmsB, mmdA, scpA, fecR, arsH, arsC, arsB, xFP, gntR, proC, eamA, potC, potB, potD, qdoI, kduD, kduI, mglA, araH, rbsB, adhE, gntR, araC, msuE, sfnG, livH, livK, caiA, …	ugpC, ugpE, ugpA, ugpB, ugpA, ugpE, ugpC	gntK, ugpC, ugpC, phoP, ugpC	2022-03-22	0.6226091654548392			grassland soil	396096	Germany: exploratory Hainich	whole organism	circular	5.10811e+16	104584642	Germany,exploratory Hainich			Alphaproteobacteria (28211)	Rhizobiaceae (82115)	Shinella (323620)	Shinella sp. H4-D48	Hyphomicrobiales (356)	Pseudomonadota (1224)	Shinella_sp._H4-D48 (2925841)		Bacteria (2)	67822976	-41932383	GCF_022637395.1	62.8	MOBQ	mobilizable	7	5
NZ_CP094456.1	456981	32.3	0	0	0	432	7	62	0	0	0	0	0	0	adcA, parB, xerS, tetR, tnp, yodJ, hppD, dltA, dnaN, pqqD, glcU, yesE, gloB, cxxC, pgpB, ycaP, pseI, pseH, pseG, pseC, yncE, tnp, copY, flgG, fliD, tnp, gntR, araC, araC, tetR, araC, araC, mphM, tnp, yxeA, rsfA, thiF, ltrA, cdiI, dnaN, ltrA, ltrA, traG, traM, cpaB, gspF, gspF, yhfH, yicC, ltrA, prgI, herA, fabG, ribA, ribD, ribD, colA, norM, rimI, ycgB, marR, satA, lacI, araC, adcA		gdh, RegX3	2022-04-06	0.3225889041338699			biological soil crust	456981	China:Tengger Desert	cell culture	circular	387303503	1.0445e+16	China,Tengger Desert			Bacilli (91061)	Bacillaceae (186817)	Bacillus (1386)	Bacillus sp. ZJS3	Bacillales (1385)	Bacillota (1239)	Bacillus_sp._ZJS3 (2928154)		Bacteria (2)	-20503578	-4982596	GCF_022809835.2	35.4	MOBL	mobilizable	0	2
NZ_CP094670.1	131837	56.6	0	0	0	85	0	15	0	0	0	0	0	0	tolC, parA, tolC, ridA, helD, araC, pmoA, fecR		RegX3	2022-04-07	0.5660322974582249			soil	131837	China: Tibet, Qinghai	Single cell	circular	32631369775	9341354821620970				Cytophagia (768503)	Hymenobacteraceae (1853232)	Hymenobacter (89966)	Hymenobacter tibetensis	Cytophagales (768507)	Bacteroidota (976)	Hymenobacter_tibetensis (497967)		Bacteria (2)	82299595	-26564999	GCF_022827545.1	55.6	MOBB	mobilizable	0	1
NZ_CP096038.1	232201	66.7	0	0	0	245	5	49	0	0	0	0	0	0	dinB, apeA, fabG, tetR, parB, vbhA, istA, istB, ctaD, dsbA, copC, lnt, ccsB, resB, resC, copY, arsR, cadA, lspA, arsA, arsD, arsR, arsB, merR, arsR, istA, istB, copA, cadA, uspA, eamA, gnd, lgt, luxR, blaI, lpqS, lnt, ccsB, resB, tlpA, tlpA, ctaD		phoP, phoP, gnd	2022-07-16	0.6670772305028833			soil	232201	China: Guangdong Province	cell culture	linear	231357694	1131982688	China,Guangdong Province			Actinomycetes (1760)	Nocardiaceae (85025)	Rhodococcus (1827)	Rhodococcus pyridinivorans	Mycobacteriales (85007)	Actinomycetota (201174)	Rhodococcus_pyridinivorans (103816)		Bacteria (2)	70954967	-2376293	GCF_024266895.1	68.0	MOBF	mobilizable	0	3
NZ_CP096253.1	177824	61.8	0	0	0	195	1	37	0	0	0	0	0	0	trbB, virB3, virB4, trbJ, trbL, virB5, trbG, trbH, trbI, csa3, istA, istB, yecA, tnpB, tnp, traG, traD, traA, traF, vapC, tnp, csa3, tnp, tnpB, ltrA, istA, istB, tnpB, tnpB, tnpB, tnp, ltrA, tnpB, yecA, tnp, tnpB, tnpB, yecA, tnpB, tnpB, ltrA, tnpB, tnp, ppx, piuB, scpB, istA, istB, istB, mazF, vapB, vapC, repC, repB, parA		ppk	2022-04-21	0.6175263181572791	Glycine max cv. AC Glengarry		Root nodule from soybean plant inoculated with root zone soil from Apios americana	177824	Canada: Quebec, Quebec	Cell Culture	circular	468137431	-712084061	Canada,Quebec,Quebec			Alphaproteobacteria (28211)	Nitrobacteraceae (41294)	Bradyrhizobium (374)	Bradyrhizobium barranii	Hyphomicrobiales (356)	Pseudomonadota (1224)	Bradyrhizobium_barranii (2992140)		Bacteria (2)	7194282	-4735279599999990	GCF_017565685.3	63.4	MOBQ	mobilizable	0	1
NZ_CP097260.1	81902	33.8	0	0	0	70	2	8	0	0	0	0	0	0	purR, narK, iolG, iolC, iolA3, iolD, iolE, fba, iolB, yajC, fadH2, comP, ybfO, mmuP, mmuM, fabZ, vanR, gntR		phoB, phoB	2022-11-03	0.3383067568557544			surface soil	81902	China:nanning	pure culture	circular	228193063	1083627211	China,nanning			Bacilli (91061)	Bacillaceae (186817)	Bacillus (1386)	Bacillus thuringiensis	Bacillales (1385)	Bacillota (1239)	Bacillus_thuringiensis (1428)		Bacteria (2)	-22085118	-4614156200000000	GCF_025947955.1	35.2	MOBL	mobilizable	0	2
NZ_CP097353.1	393127	33.7	1	0	0	394	2	30	0	0	0	0	0	0	spoVAE, spoVAC, trnR, cls, yozG, araC, istB, tnp, spoIVCA, ydeE, spoIVCA, merB1, merB2, merR2, merA, merP, merT, merR1, merB3, aimR, marR, impB, hsdM, umuC, abrB, arsR, comG, herA, prgI, tnsA, trxB, arsA, arsD, arsC, arsB, phnA, dltC, sulP, arsN1, yicC, gspF, gspF, cpaB, tnp, tnp, tubR, tubZ, traG, ftsK, ltrA, dnaN, fbpA, ltrA, fbpB, czcR, eamA, rsfA, preA, sbnA, pyrE, ant(6), ampC, ltrA, bdbC2, …		pyrE, phoB, phoB	2022-05-23	0.3369165689459131			oil contaminated soil	393127	China:Tianjin	pure culture	circular	391235635	1171980785	China,Tianjin			Bacilli (91061)	Bacillaceae (186817)	Bacillus (1386)	Bacillus cereus	Bacillales (1385)	Bacillota (1239)	Bacillus_cereus (1396)		Bacteria (2)	-2.03274e+16	-50161433	GCF_023516415.1	35.3	MOBL	mobilizable	0	3
NZ_CP097481.1	319096	45.1	0	0	0	319	2	65	0	0	0	0	0	0	yprA, hepA, hipB, pilT, xerD, uma2, moxR, higA, virD4, trbI, trbJ, virB4, amyA, copG, ubiE, cas4, phnB, spoVK, mrp, citB, baeS, abiEi, immA, immA, hipB, xerD, scpA, parB, ssb, arsR, czcD, cadA, nlpD, yneE, rpoD, czcD, pcxA, rppB, rppA, cusA, acrA, c2c8, arsR, gerM, copG, cysK, gloB, copZ, arsR, batD, ynfA, sufI, zupT, qcrA, tPR, mscK, yvlD, perM, ubiE, ykvA, luxR, luxR, mreD, spoIVCA, fldA, soxR,…		phoP, phoB	2022-05-27	0.4508486474289869			soil	319096	China: wuhan	cell culture	circular	3.05951e+16	1142999353	China,wuhan			Cyanophyceae (3028117)	Chroococcidiopsidaceae (1890528)	Chroococcidiopsis (54298)	Chroococcidiopsis sp. CCNUC1	Chroococcidiopsidales (1890505)	Cyanobacteriota (1117)	Chroococcidiopsis_sp._CCNUC1 (2653189)		Bacteria (2)	10490156	0.041477703	GCF_023546805.1	44.4	MOBV	mobilizable	0	2
NZ_CP097491.1	136400	57.4	0	0	0	151	1	30	0	0	0	0	0	0	tnp, tnp, rulB, asnC, ardR, mobE, mobD, tnp, mobC, mobA, traH, traI, traJ, icmT, traL, trbN, trbA, istB, istA, tnp, chpS, pilZ, traY, traX, traW, traU, traR, traQ, traP, traO, traN, traM, insH, insH, lysR, ptxD, phnE, ptxB, phnC, osmC, arsR, bisC, hybA, lptG, lptF, hepA, kfrA, parA, parB, lysR, modA, modB	phnE, ptxB, phnC	ptxD, ptxC, ptxB, phnC	2022-05-27	0.5739296187683285			soil	136400	China: Jiangsu Province	wastewater treatment tank	circular	330000001	1199999999	China,Jiangsu Province			Gammaproteobacteria (1236)	Pseudomonadaceae (135621)	Pseudomonas (286)	Pseudomonas sp. BYT-5	Pseudomonadales (72274)	Pseudomonadota (1224)	Pseudomonas_sp._BYT-5 (2944392)		Bacteria (2)	41526456	-24054332	GCF_023546785.1	62.3	MOBP	mobilizable	3	4
NZ_CP097492.1	56145	64.8	0	0	0	66	0	4	0	0	0	0	1	1	klcA, klcB, korC, kleA, kleB, kleE, kleF, trfB, incC, korB, kfrB, kfrC, traM, traL, traK, traJ, traI, traG, traF, topB, traD, traC, tnp, ribN, qseB, traX, trbO, trbM, trbL, trbL, trbJ, trbI, trbH, trbG, virB8, virB4, trbD, trbC, trbB, ssb, trfA, parD		RegX3	2022-05-27	0.6477157360406092			soil	56145	China: Jiangsu Province	wastewater treatment tank	circular	330000001	1199999999	China,Jiangsu Province	IncP1_2, U67194,		Gammaproteobacteria (1236)	Pseudomonadaceae (135621)	Pseudomonas (286)	Pseudomonas sp. BYT-5	Pseudomonadales (72274)	Pseudomonadota (1224)	Pseudomonas_sp._BYT-5 (2944392)		Bacteria (2)	5135503	-26614065	GCF_023546785.1	62.3	MOBP	mobilizable	0	1
NZ_CP098484.1	334691	70.5	0	0	0	328	5	72	0	0	0	0	0	0	tetR, rsbA, copG, tpgA2, nudC, brkB, fabG, ppsC, nhaA, apeA, tetR, marR, asnC, wrbA, lysR, arr, infA, kstR2, lolD, padR, ulaG, tnpA, lysR, marR, marR, nfnB, yncE, lysR, dinB, marR, yphA, btaA, merR		gnl, phnO	2022-06-13	0.7048859993247503			soil	334691	Brazil: Pernambuco state	Bacteria	linear	-8361371	-4013418				Actinomycetes (1760)	Streptomycetaceae (2062)	Streptomyces (1883)	Streptomyces sp. Caat 7-52	Kitasatosporales (85011)	Actinomycetota (201174)	Streptomyces_sp._Caat_7-52 (2949637)		Bacteria (2)	7227593400000000	-3.12932e+16	GCF_023702655.1	72.2	non-mob	non-mob	0	2
NZ_CP098808.1	1753114	62.7	4	0	3	1548	1	68	0	0	0	0	0	0	repA, repB, ctRNA_p42d, repC, crp, tctA, tctB, tctC, rsuA, ampC, acyC, gstA, lysR, lytT, lytS, lytS, ialB, rutF, arsR, yndB, lysR, yajL, Atu_At1, ydfG, gstA, yghU, terC, adhE, lysR, rpoE, fecR, fepA, iucA, iucA, menE, acpP, ycjR, acyC, menH, aceE, acd, lrp, oppF, selA, iclR, ridA, dppC, dppB, ddpA, racX, lysR, ycaC, fucP, lrp, lysR, yciW, ybjT, qdoI, iscR, nlpD, rhtB, gGDEF, adaB, bDS1, asmA, arp…	ugpE, ugpA, ugpB, ugpE, ugpA, ugpB, phnP, ugpB, ugpA, ugpE, ugpA, ugpE, ugpB, ugpA, ugpE, ugpB, phnN, phnM, phnE, phnE, phnD, phnC, phnD, ugpE, ugpA, ugpB, phnF, phnG, phnH, phnI, phnJ, phnK, phnL, ugpE, ugpA, ugpB, ugpB, ugpA, ugpE, ugpB, ugpE, ugpA, ugpB, ugpA, ugpE	gntK, pckG, phoB, phnN, phnM, phnE, phnE, phnD, phnC, phoB, ugpC, ugpE, ugpA, ugpB, phoB, ugpC, phoB, phnG, phnH, phnI, phnJ, phnK, phnL, phoB, nrdE, nrdE, nrdF, phoB, phoB	2022-06-22	0.6267219359379937			soil	1753114	China:Beijing	whole organism	circular	399059631	116391248	China,Beijing			Alphaproteobacteria (28211)	Rhizobiaceae (82115)	Ensifer (106591)	Ensifer adhaerens	Hyphomicrobiales (356)	Pseudomonadota (1224)	Ensifer_adhaerens (106592)		Bacteria (2)	6827486500000000	-4165035700000000	GCF_023821965.1	62.9	MOBQ	mobilizable	45	29
NZ_CP098809.1	1701077	60.0	6	0	3	1621	12	234	0	0	0	0	0	0	repA, repB, parD1, parE, xerD, gntR, lysR, hyuB, lysR, kynU, spoIVCA, lysR, gltA, luxR, acs, araC, ltrA, fadR, nikD, ttuD3, glcE, glcF, iclR, rraA, ftsZ, fabF, acrB, paaI, adhE, lysR, trnI, ugpC, glcF, fixJ, marR, sWEET, serA, cspC, trxB, yciE, tdh, pleD, menH, brkB, yecE, rfaB, glf, yciE, catE, fixJ, groL, groES, usg, ibpA, citB, udg4, hemH, tspO, fAS1, fabG, rpiR, hisJ, artQ, artM, hisP, chrR, …	ugpC, phnK, phnK, ugpB, ugpB, ugpA, ugpE, ugpB, ugpA, ugpE, ugpB, ugpE, phnY, ugpB, ugpE, ugpA, ugpB, ugpA, ugpE, ugpE, ugpA, ugpB, ugpB, ugpE, ugpA, ugpB, ugpA, ugpE, ugpE, ugpA, ugpB, phnD, ugpE, ugpA, ugpB, phoB	adk, ugpC, ugpC, phoB, phny, phnA, phnW, phoR, ugpE, ugpC, gnl, pyrF, gnd, gntK	2022-06-22	0.5999375689636625			soil	1701077	China:Beijing	whole organism	circular	399059631	116391248	China,Beijing			Alphaproteobacteria (28211)	Rhizobiaceae (82115)	Ensifer (106591)	Ensifer adhaerens	Hyphomicrobiales (356)	Pseudomonadota (1224)	Ensifer_adhaerens (106592)		Bacteria (2)	7160781	-4129593	GCF_023821965.1	62.9	MOBQ	mobilizable	36	14
NZ_CP098811.1	142749	59.9	0	0	0	156	1	22	0	0	0	0	0	0	repA, repB, ctRNA_p42d, repC, copG, traA, traG, virB11, trbI, virB9, virB8, virB6, virB4, exoI, petA, hlyD, nirK, dedA, tolC, sufI, ykuD, copG, cusA, mntR, arsO, arsH, arsB, arsC, arsR, aioR, glp, arsK, phoB, phoB, phoU, pstB, pstA, pstC, phnC, phnD, phnE, phnE, rptA, psiB, dprA, parB, repC, vbhA	phoB, phoB, phoU, pstB, pstA, pstC, phnC, phnD, phnE, phnE	phoB, phoB, phoU, pstB, pstA, pstC, pstS, phnC, phnD, phnE, phnE	2022-06-22	0.5985541054578316			soil	142749	China:Beijing	whole organism	circular	399059631	116391248	China,Beijing			Alphaproteobacteria (28211)	Rhizobiaceae (82115)	Ensifer (106591)	Ensifer adhaerens	Hyphomicrobiales (356)	Pseudomonadota (1224)	Ensifer_adhaerens (106592)		Bacteria (2)	6713755	-4499951	GCF_023821965.1	62.9	MOBQ	mobilizable	10	11
NZ_CP099261.1	183022	52.2	0	0	0	237	5	36	0	2	0	0	0	0	xerD, tnp, tnp, tnp, rbsB, araH, mglA, xylB, tdh, cytR, purR, tnp, tnp, traK, tnp, tnp, marR, rES, kipI, gntR, tra5, yaeB, tnp, tnp, rpoH, mscS, tnp, tnp, moaA, moaC, moaD, moaE, insE, tnp, tnp, tnpB, insE, pcoE, parE, ydfA, ydeA, yaeB, tra5, cpaD, sctV, sctT, fliQ, sctR, sctJ, hrpK, ccmI, tnp, repA, repA, tap, copA, copB, proQ, traX, traI, traD, traT, traS, traG, AS-traG, traH, trbF, trbB, traQ,…		phoH, phoX, phoH	2023-04-15	0.5224563167269508			Pooled soil sample collected from floor of cattle farm	183022	United Kingdom	culture	circular	5470235450000000	-32765753	United Kingdom	IncFIB(K)_1, JN233704, |IncFII(pKP91)_1, CP000966,	IncF RST(K12:A-:B-):FIA(-);FIB(-);FIC(-);FII(-);FIIK(12);FIIS(-);FIIY(-)	Gammaproteobacteria (1236)	Enterobacteriaceae (543)	Klebsiella (570)	Klebsiella aerogenes	Enterobacterales (91347)	Pseudomonadota (1224)	Klebsiella_aerogenes (548)		Bacteria (2)	-0.647383	2072659	GCF_029717585.1	54.9	MOBF	mobilizable	0	3
NZ_CP101136.1	292347	33.5	1	0	0	306	2	24	0	0	0	0	0	0	tetR, ltrA, ltrA, dprA, bdbC2, hfq, xerS, arsA, arsD, arsC, arsB, arsR, arsR, marR, tniQ, tnsA, thiS, copZ, copZ, arsR, lgt, yhjQ, ehuA, spoIIP, arsR, gshB, fghA, frmA, clpP, ycaP, spoVAE, spoVAD, spoVAC, trnR, cls, yozG, araC, istB, tnp, spoIVCA, ydeE, spoIVCA, aimR, marR, umuC, abrB, arsR, comG, traG, ltrA, prgI, yicC, tnp, yhfH, recU, RAGATH-18, gspF, gspF, cpaB, tnp, tnp, tnpB, tubR, tubZ, tr…		phoB	2022-07-18	0.3349991619548003			soil	292347	China:Wuhan,HUbei	single cell	circular	305635277	1.1436e+16	China,Wuhan,HUbei			Bacilli (91061)	Bacillaceae (186817)	Bacillus (1386)	Bacillus paranthracis	Bacillales (1385)	Bacillota (1239)	Bacillus_paranthracis (2026186)		Bacteria (2)	-20498161	-5009817	GCF_024296885.1	35.5	MOBL	mobilizable	0	1
NZ_CP101518.1	1781172	62.6	4	0	3	1595	3	84	0	0	0	0	0	0	potA, potC, potB, potD, lysR, tdh, kbl, panE, potA, potC, potB, potD, lysR, rimL, pobA, pobA, vapC, vagC, eRG3, gatA, acrR, msrP, iclR, atoD, atoA, pcaF, ganA, purR, gDB1, ugpE, ugpA, ugpB, malK, srkA, yqjQ, hisM, hisJ, purR, fabG, erfK, sTE14, ychJ, ftsK, repB, repA, abgB, ddpA, penP, nikD, dppC, dppB, czcD, msrC, lysR, caiA, ssuD, caiA, crp, yqjQ, iscR, urtE, urtD, urtC, urtB, urtA, acyC, purR,…	ugpE, ugpA, ugpB, ugpB, ugpA, ugpE, ugpB, ugpE, ugpA, ugpB, ugpA, ugpE, ugpE, ugpA, ugpB, ugpE, ugpA, ugpB, phnP, ugpB, ugpA, ugpE, ugpA, ugpE, ugpB, ugpA, ugpE, ugpB, phnN, phnM, phnE, phnE, phnD, phnC, phnD, ugpE, ugpA, ugpB, phnF, phnG, phnH, phnI, phnJ, phnK, phnL	phoB, nrdE, nrdE, nrdF, phoB, phoB, gntK, phoB, phnN, phnM, phnE, phnE, phnD, phnC, phoB, ugpC, ugpE, ugpA, ugpB, phoB, ugpC, phoB, phnG, phnH, phnI, phnJ, phnK, phnL	2022-07-29	0.6261119083390038			rhizosphere soil	1781172	China:wheat rhizosphere soil,Nanjing	cell cuture	circular	3.20616e+16	1187915619	China, Jiangsu,Nanjing			Alphaproteobacteria (28211)	Rhizobiaceae (82115)	Ensifer (106591)	Ensifer adhaerens	Hyphomicrobiales (356)	Pseudomonadota (1224)	Ensifer_adhaerens (106592)		Bacteria (2)	6.86306e+16	-4133515	GCF_024380055.1	62.9	MOBQ	mobilizable	45	28
NZ_CP101519.1	1586769	60.1	5	0	3	1574	12	253	0	0	0	0	0	0	fecR, mauE, pyrF, tolBN, ftsI, gntR, fcbT3, tnp, tnpB, ngg, fadR, dppB, imp, marR, tnp, nhaA, cspC, arsR, arsN2, arsB, arsC, arsH, fabG, tauE, arsK, arsR, fIDO, lysR, speB, fabG, fabG, cDA1, fUI1, betA, aRO8, afuA, potC, potA, ycjR, suhB, purR, pptA, yvrE, rbsB, mglA, araH, araH, menH, ugpE, lplB, ugpC, gntR, vapC, vapB, istA, istB, esiB, fabG, lysR, marR, gcvA, calR9, stbC1, vapC, hisJ, hisM, rh…	ugpE, ugpC, ugpB, ugpA, ugpE, ugpE, ugpA, ugpB, ugpA, ugpE, ugpB, ugpB, ugpA, ugpE, ugpE, ugpA, ugpB, ugpA, ugpE, ugpB, phnY, ugpE, ugpB, ugpE, ugpA, ugpB, phoD, ugpE, ugpA, ugpB, ugpB, phnK, phnK, ugpA, ugpB, ugpC, phoB, ugpB, ugpA, ugpE	pyrF, gnl, ugpC, ugpC, ugpE, phoR, phnW, phnA, phny, phoB, ugpC, phoB	2022-07-29	0.6014757031426755			rhizosphere soil	1586769	China:wheat rhizosphere soil,Nanjing	cell cuture	circular	3.20616e+16	1187915619	China, Jiangsu,Nanjing			Alphaproteobacteria (28211)	Rhizobiaceae (82115)	Ensifer (106591)	Ensifer adhaerens	Hyphomicrobiales (356)	Pseudomonadota (1224)	Ensifer_adhaerens (106592)		Bacteria (2)	7067608	-41664386	GCF_024380055.1	62.9	MOBQ	mobilizable	40	12
NZ_CP101525.1	3525317	67.0	6	0	3	3132	6	88	0	0	0	0	0	0	cobL, gstA, hisJ, atoC, fkpA, nphR, hxlR, araJ, rfaB, rfaB, rfaB, gumC, wza, wzb, ugd, wcaJ, cpsB, glpC, yotD, yCII, yCII, elaB, sYLF, perM, curA, fabG, mntH, araC, lysR, yhfA, efeB, mdlB, ribE, clcA, cheB3, ompR, cheW, tadD, tar, pleD, nhaP, adhE, ilvB, pA5055, yjiN, andAa, andAb, andAd, andAc, andR, lysR, rspA, catA, catC, lysR, fadH, araC, acnX2, acnX1, marR, lysR, marR, emrA, araJ, tolC, gcvA…	phoA, phoA, ugpE, ugpA, ugpB, phnO, phnW, phnS, phnT, phnU, phnV, phnY, ugpB, ugpA, phoD, ugpQ, aepX	phoB, phoB, ugpC, phoB, phoA, phoA, lysR, ugpC, ugpC, phnW, phnS, phnU, phnA, phny, pit, phoB, phoB, gdh, pit, phoB, lysR, phoB, pit, pckG, prsA, glpQ, phoB, ugpC, ugpC, ppd, phnW, phny, phny, purF, gnd, ugpC	2022-07-31	0.6700367654880398			soil	3525317	China:Shandong	mixed culture	circular	360000001	1189999999	China,Shandong			Betaproteobacteria (28216)	Burkholderiaceae (119060)	Burkholderia (32008)	Burkholderia arboris	Burkholderiales (80840)	Pseudomonadota (1224)	Burkholderia_arboris (488730)		Bacteria (2)	5722036	-39260283	GCF_024381035.1	66.7	MOBP	mobilizable	17	36
NZ_CP101526.1	1260712	66.5	2	0	3	1038	3	51	0	0	0	0	0	0	prpD, lysR, prpD, citE, caiB, qor, pncA, araJ, potD, potC, potA, hisJ, hisM, hisM, artP, lysR, tnp, tnp, tnp, vgrG, msrB, msrA, hcaE, cdd, deoA, nupC, hydA, ncs1, preA, gltD, argE, acrR, paaJ, fabG, acs, araC, codB, bioA, adhE, rrf, rrl, trnA, trnI, rrs, spoT, yhaN, sbcD, ggt, lysR, uraA, rES, glxA, dLH, adeC, adeB, adeA, Bcj14, araC, lysR, purA2, lysR, parA, araC, ulaG, tetR, proQ, rhaT, mopI, t…	ugpE	spoT, purA, phoB, purB, ugpC, RegX3	2022-07-31	0.6654414330949495			soil	1260712	China:Shandong	mixed culture	circular	360000001	1189999999	China,Shandong			Betaproteobacteria (28216)	Burkholderiaceae (119060)	Burkholderia (32008)	Burkholderia arboris	Burkholderiales (80840)	Pseudomonadota (1224)	Burkholderia_arboris (488730)		Bacteria (2)	6175815	-37703774	GCF_024381035.1	66.7	MOBP	mobilizable	1	6
NZ_CP102386.1	227036	63.1	0	0	0	235	0	29	0	0	0	0	0	0	ppsA, yjdF, vapC, uspA, uspA, uspA, fixJ, csa3, mobF, traD, copG, ssb, vapC, arsH, arsB, arsC, arsR, tetR, hlyD, lptB, yadH, ubiE, marR, tonB, pilZ, ubiC, ardC, parB, parD, uspA, yhaN, copG, parE, darT, parA, marR, vapB, vapC, tolC, ndh, acrB, arsR, cydX, cydB, cydD, arsR, ahpC, trxC, ahpC, gloB, tauE, hipA, sulP, pckA, istA, istB, traA, traL, traE, traK, traB, traV, traC, trbI, traW, traU, trbC,…		pps, phoB, pckA	2022-08-13	0.6305123416550679			soil	227036	China: Nanjing		circular	31.57	118.5				Alphaproteobacteria (28211)	Sphingomonadaceae (41297)	Sphingopyxis (165697)	Sphingopyxis sp. DBS4	Sphingomonadales (204457)	Pseudomonadota (1224)	Sphingopyxis_sp._DBS4 (2968500)		Bacteria (2)	6552276	-34763057	GCF_024628865.1	65.4	MOBQ	mobilizable	0	3
NZ_CP102846.1	556397	59.6	2	0	0	639	2	236	0	0	0	0	0	0	yebA, recA, yciE, yidB, ysnF, lysR, perM, spoIVCA, repA, repB, rve, mazG, rpiB, hisJ, glnQ, hisM, hisM, fadR, aspB, rraA, nac, accC, pxpB, pxpC, pxpA, ydfG, hisM, hisM, glnQ, hisJ, fabG, ldhA, tdh, pntB, trnL, groL, groES, xerD, repC, menH, rve, dksA, hfq, lprI, parB, parA, accD, trnI, gcrA, ylxR, nthA, yncE, folA, dsbA, clpA, ctaD, hlyD, cydB, appC, glxA, luxR, trpC, moaA, glcG, lysR, fdh3B, tor…	ugpC	lysR, phoB, prsA, ugpC	2022-08-16	0.5963367883004401			soil	556397	South Korea: Yeong-wol	soil	circular	371834983	1284619814	South Korea, Gangwon State,Yeongwol-gun			Alphaproteobacteria (28211)	Methylobacteriaceae (119045)	Microvirga (186650)	Microvirga terrae	Hyphomicrobiales (356)	Pseudomonadota (1224)	Microvirga_terrae (2740529)		Bacteria (2)	6952000000000000	-42865667	GCF_013307435.2	64.4	MOBQ	mobilizable	1	4
NZ_CP102847.1	238488	60.9	0	0	0	240	0	55	0	0	0	0	0	0	dnaJ, tehA, sfcA, cydB, appC, hmpA, xapX, doxX, gltP, doxX, araC, uvrD, hisJ, lysR, drmC, drmA, drmD, repC, repB, repA, spoIVCA, wcaG, ltrA, araC, sigJ, lysR, araC, lysR, dsrE, lysR, marR, trxB, ribA, osmC, pdhA, nuoF, msrA, msrB, acrB, araC, bglB, cheY, dipZ, lprI		phoP	2022-08-16	0.6087224514440979			soil	238488	South Korea: Yeong-wol	soil	circular	371834983	1284619814	South Korea, Gangwon State,Yeongwol-gun			Alphaproteobacteria (28211)	Methylobacteriaceae (119045)	Microvirga (186650)	Microvirga terrae	Hyphomicrobiales (356)	Pseudomonadota (1224)	Microvirga_terrae (2740529)		Bacteria (2)	6.81395e+16	-38967135	GCF_013307435.2	64.4	MOBQ	mobilizable	0	1
NZ_CP103869.1	1060223	63.9	1	0	0	864	1	38	0	0	0	0	0	0	pnuC, marR, fecR, yccC, lysR, nodT, acrB, galA, yvrE, fadR, cobO, cobF, cobM, cbiE, cobI, cobG, cobN, cobW, pip, copC, phhA, norM, lysR, astD, lacI, pfkB, cynR, cynS, dapA, lysR, lysR, fadR, cspA, yegP, istB, istA, xerC, marR, istB, istA, trnQ, yafY, pcaD, benD, benB, catC, lysR, lysR, cydB, cydX, tadG, tadE, mreB, lysR, lacI, marR, tolC, acrB, arsR, bluB, lacI, lysR, acnA, iclR, sigJ, arsC, arsC…		phoB	2023-07-07	0.6388448467916655			soil biofilm	1060223	China: rice field	pure culture	circular	3092323575	1.21004e+16	China,rice field			Alphaproteobacteria (28211)	Sphingomonadaceae (41297)	Novosphingobium (165696)	Novosphingobium humi	Sphingomonadales (204457)	Pseudomonadota (1224)	Novosphingobium_humi (2282397)		Bacteria (2)	6987189999999990	-3939998600000000	GCF_030388345.1	63.6	non-mob	non-mob	0	1
NZ_CP104318.1	616127	71.2	0	0	0	459	3	57	0	0	0	0	0	0	tniQ, eamA, hppD, dhaL, gntA, vOC, uvrA, lacF, deoR, rho, pucR, alr, marR, tcmN, wrbA, fhaA, ridA, kcsA, hemC, ftsH, prgI, virB4, doxX, lysR, mobC, hicA, whiB, yccS, dnaK, grpE, dnaJ, merR, clpB, trxA, cas2e, cas1e, cas6e, cas5e, cas7e, casB, casA, argP, sbnA, sbnB, tetR, asnB, copZ, lysR, fabG, hsaA, thcR, styA, asnB, pabB, ethR, yqjQ, yncE, mmdA, tetR, mqnE, mqnC, ASpks, rfbH, yjiC, rfbB, glmU,…		pit	2022-09-20	0.7119928196621801			soil	616127	China: Chongqing	whole organism	circular	295585712	1065492822	China,Chongqing			Actinomycetes (1760)	Streptomycetaceae (2062)	Streptomyces (1883)	Streptomyces angustmyceticus	Kitasatosporales (85011)	Actinomycetota (201174)	Streptomyces_angustmyceticus (285578)		Bacteria (2)	72208776	-30549953	GCF_025252265.1	72.4	non-mob	non-mob	0	1
NZ_CP104990.1	776996	59.7	1	0	0	808	36	128	0	0	0	0	0	0	fecR, nikD, dppC, dppB, marR, gntR, ugpE, ugpC, dhaK, iclR, rutD, rutC, rutB, rutA, dctP, tetR, lysR, paoA, paoC, abfA, fdxA, araC, lysR, lysR, yecD, lysR, lysR, perM, hutC, gnd, repA, repB, repB, repC, gntR, alr, ompR, modB, lacI, dppB, iclR, tnp, ctaD, coxB, poxB, rspA, gntR, dppB, pqqB, pqqC, pqqD, pqqE, argE, nikD, dppB, gntR, rfaD, exoY, fkbM, pcaH, pcaC, pcaD, pcaQ, lysR, caiA, glxA, yqaE, …	ugpE, ugpC, ugpC, ugpA, ugpE, ugpC, ugpC	ugpC, ugpC, ugpA, ugpE, ugpC, ugpC, ugpC, gnd, RegX3, ugpC, ugpC, ugpC, ugpA, ugpC, ugpC	2023-06-25	0.5974432300809785	Chiu-Chung Young		agricultural soil	776996	Taiwan	cell culture	circular	235982979	1208353631	Taiwan			Alphaproteobacteria (28211)	Rhizobiaceae (82115)	Rhizobium (379)	Rhizobium sp. CC-CFT758	Hyphomicrobiales (356)	Pseudomonadota (1224)	Rhizobium_sp._CC-CFT758 (2926709)		Bacteria (2)	68806257	-42448716	GCF_030323265.1	61.3	MOBQ	mobilizable	7	15
NZ_CP104991.1	806102	58.1	3	0	3	981	41	283	0	0	0	0	0	0	gntR, luxR, parA, trbG, virB4, virB3, himA, argG, dinB, ompR, lysR, cheR, cheB, cheB, vapB, vapC, lysR, Atu_At1, wrbA, parD, copG, vapC, potA, potC, potD, argE, lysR, ridA, pitA, smvA, lacI, ugpA, ugpC, ulaG, rpiR, tctB, tctC, iclR, rraA, ar14, Atu_At1, vbhA, iclR, ddpA, ggt, dppC, lysR, vapC, dhaK, dhaL, hipA, fhuC, copG, ssuD, lysR, ugpC, ugpA, vapC, lysR, vapC, lysR, groES, groL, tetR, cspC, h…	ugpA, ugpC, ugpC, ugpA, ugpB, ugpA, ugpE	RegX3, phoR, phoR, ugpC, pit, ugpC, ugpC, ugpE, RegX3, lysR, lysR, phoB, ugpC, ugpB, ugpB, ugpA, ugpE, ugpC	2023-06-25	0.5808570131323332	Chiu-Chung Young		agricultural soil	806102	Taiwan	cell culture	circular	235982979	1208353631	Taiwan			Alphaproteobacteria (28211)	Rhizobiaceae (82115)	Rhizobium (379)	Rhizobium sp. CC-CFT758	Hyphomicrobiales (356)	Pseudomonadota (1224)	Rhizobium_sp._CC-CFT758 (2926709)		Bacteria (2)	6573192999999990	-49519715	GCF_030323265.1	61.3	MOBQ	mobilizable	7	18
NZ_CP106677.1	282751	32.3	0	0	0	244	0	20	0	0	0	0	0	0	padR, rsiW, ftsN, tnp, bla, rpoE, ftsI, rodA, tnp, gerAC, gerAB, gerAA, brnQ, glsA, fabZ, gcvT, fabF, rfbA, rfbC, rfbB, rfbD, araJ, acrR, dinB, yxeA, lolD, yxeA, ftsK, resD, xerS, arsR, mmuM, mmuP, mgtA, mgtE, manA, bglG, argR, tdcB, ald, ftsK, lolD, vanR, graR, tauE, yrhO, vanZ, hfq, prsA, tnpB, vanZ, blaIII, manZ, manY, dhaL, dhaK, gldA, tnpB, lolD, scfB, scfA, potE, tdcB, ald, tnpB, nrdD, nrdG…		dut, phoB, phoB, dut, phoB, phoB, phoR, nrdD	2022-10-01	0.3229767533978659			soil	282751	South Korea:Buyeo	cell culture	circular	362753678	126910107	South Korea,Buyeo			Bacilli (91061)	Bacillaceae (186817)	Bacillus (1386)	Bacillus cereus	Bacillales (1385)	Bacillota (1239)	Bacillus_cereus (1396)		Bacteria (2)	-24824362	-4585100700000000	GCF_025502485.1	35.3	MOBL	mobilizable	0	8
NZ_CP107028.1	383056	35.9	0	0	0	421	2	90	0	0	0	0	0	0	traM, gspF, gspF, ytzI, marR, arsN1, pstS, pstC, pstA, pstB, phoU, arsC, arsD, arsA, trxB, radC, ssb, dnaA, ltrA, ltrA, ltrA, hrcA, istA, istB, yopX, lgt, murE, spoIIP, copZ, copZ, lspA, cadA, lpdA, cadD, cysK, lspA, cadD, ccsB, istB, istA, hutP, hutH, spoIVCA, arsR, drsE, ccdA, trxB, lgt, qoxA, qoxB, qoxD, nhaC, ywmB, ccmE, ccmH, ccmI, ccmB, ccmD, tlpA, walK, copC, copZ, xerS, sdrC, repB, istA, …	pstS, pstC, pstA, pstB, phoU	pit, phoA, pstS, pstC, pstA, pstB, phoB, phoP, phoB, phoP	2022-10-20	0.3592973351154923			soil	383056	China: Beijing	whole organism	circular	399059631	116391248	China,Beijing			Bacilli (91061)	Bacillaceae (186817)	Cytobacillus (2675230)	Cytobacillus firmus	Bacillales (1385)	Bacillota (1239)	Cytobacillus_firmus (1399)		Bacteria (2)	-1.70633e+16	-48059053	GCF_025732135.1	42.0	MOBL	mobilizable	5	10
NZ_CP110470.1	1100117	64.9	1	0	0	1063	7	215	0	0	0	0	0	0	scbR, parG, kfrA, uspA, pspE, trxA, yurZ, frmR, ompR, orfZ, iclR, trnI, echA8, cinA, mmsB, caiD, fabG, tetR, gntR, phnD, phnC, phnE, cofG, pgi, fgd, gnd, luxR, attH, thuA, marR, marR, tetR, tetR, dps, whiB, arsR, yciI, yurZ, acnA, yeaO, hflC, marR, gltB2, nirB, tal, arsR, doxX, folE, arsR, fdxA, ctaD, arsR, marR, arsR, luxR, copG, tetR, whiB, gltA, tetR, fabG, caiA, parA, mltB, irrE, hipB, hipB, …	phnD, phnC, phnE, ugpC, ppk	phoB, phnC, gnd, ppdK, pckG, phoU, purA, ugpC, ppk, pit	2022-11-11	0.6494536490209678			Soil contaminated by oil sludge	1100117	Belarus: Minsk region, Cherven	cell culture	linear	5369908	284079				Actinomycetes (1760)	Nocardiaceae (85025)	Rhodococcus (1827)	Rhodococcus opacus	Mycobacteriales (85007)	Actinomycetota (201174)	Rhodococcus_opacus (37919)		Bacteria (2)	7054301	-24259822	GCF_026062495.1	67.3	non-mob	non-mob	5	10
NZ_CP116318.1	457481	32.7	1	0	0	404	2	50	0	1	0	0	1	0	tnp, tetR, ydcZ, tnp, tnp, ltrA, xerS, istB, tnp, yycF, tnp, tnp, pssA, tnpB, tnp, glcU, thnI, thnT, thnB, yhcF, queH, tnp, tnp, lanM, sbnB, sbnA, zmaQ, zmaN, zmaL, zmaJ, tnp, tnp, istB, tnpB, ycgB, asnB, acrR, tnpB, lolD, vanR, lytD, ubiG, tnpB, tnp, tnp, tnpB, tnp, xpaF1, immA, tnp, gntR, azlC, azlD, trnI, cynS, tolA, tnpB, yxeA, rsfA, traG, ltrA, ltrA, tnp, istB, traG, traM, cpaB, gspF, gspF, …		gdh, ushA, spoT, spoT, phoB	2023-04-03	0.3266540031170693			soil sample	457481	Lebanon	soil sample	circular	338750629	35843409	Lebanon	rep3_1_rep63A(pAW63), BTH011655,		Bacilli (91061)	Bacillaceae (186817)	Bacillus (1386)	Bacillus thuringiensis	Bacillales (1385)	Bacillota (1239)	Bacillus_thuringiensis (1428)		Bacteria (2)	-27279515	-4513335700000000	GCF_028356555.1	35.2	MOBL	mobilizable	0	5
NZ_CP116354.1	206313	70.1	0	0	0	169	0	30	0	0	0	0	0	0	solA, pucR, parA, lacF, luxR, tcrA, lysR, fabG, ywqG, lysR, fabG, copG, lysR		phoB	2023-01-29	0.7011821843509619			rhizosphere soil	206313	China: Changde	microorganism	linear	29034552	1116928724	China,Changde			Actinomycetes (1760)	Streptomycetaceae (2062)	Streptomyces (1883)	Streptomyces sp. HUAS 31	Kitasatosporales (85011)	Actinomycetota (201174)	Streptomyces_sp._HUAS_31 (3020055)		Bacteria (2)	7038993	-37926843	GCF_028198125.1	71.0	non-mob	non-mob	0	1
NZ_CP117412.1	185404	64.6	0	0	0	202	1	17	0	0	0	0	0	0	czcD, soxR, ctpA, istA, istB, merT, merR, cueR, fliQ, copD, copC, copB, mauE, dmeF, chrB, dmeF, spoIVCA, spoIVCA, lysR, sorB, acrR, qor, frmA, uvrA, yajL, tdh, ydfG, ygiN, yajL, lysR, istA, istB, rpsU, mucR, vapC, istA, istB, spoIVCA, tolC, lysR, istB, istA, repA, parB, copG, mobF, ynfA, arsH, arsN2, arsB, arsC, arsR, dedA, tniQ, mgtC, zntA, czcD, zupT, fliE, cusA, acrA, tolC		phoB	2023-02-16	0.6455632025199025			Oil contaminated soil	185404	South Korea: Jeollabuk-do, Gunsan-si	Single cell	circular	359679984	1267369036	South Korea,Jeollabuk-do,Gunsan-si			Alphaproteobacteria (28211)	Sphingomonadaceae (41297)	Sphingomonas (13687)	Sphingomonas naphthae	Sphingomonadales (204457)	Pseudomonadota (1224)	Sphingomonas_naphthae (1813468)		Bacteria (2)	6.66285e+16	-3.55815e+16	GCF_028607085.1	67.7	MOBQ	mobilizable	0	1
NZ_CP117413.1	131261	62.2	0	0	0	137	0	19	0	0	0	0	0	0	ardC, ompR, traK, arsR, arsC, arsB, arsN2, arsH, lysE, parA, korB, copG, virB11, virB9, virB8, eexN, virB4, virB3, luxR, luxR, tolC, gtrA, tnpB, cydB, tauE, marR, lysR, cls, uspA, parA, ssb		phoP, phoB	2023-02-16	0.6216926581391274			Oil contaminated soil	131261	South Korea: Jeollabuk-do, Gunsan-si	Single cell	circular	359679984	1267369036	South Korea,Jeollabuk-do,Gunsan-si			Alphaproteobacteria (28211)	Sphingomonadaceae (41297)	Sphingomonas (13687)	Sphingomonas naphthae	Sphingomonadales (204457)	Pseudomonadota (1224)	Sphingomonas_naphthae (1813468)		Bacteria (2)	6573424	-35241492	GCF_028607085.1	67.7	MOBQ	mobilizable	0	2
NZ_CP117418.1	1319841	63.2	1	0	0	1100	0	65	0	0	0	0	0	0	gntR, madL, madM, nodT, cobT, cobS, cbiB, cobU, nagA, gntR, acrR, rutB, rutC, rutD, rutA, ntrC, mgtC, rhtA, fliJ, cDA1, iclR, hapK, gntR, gabD, lysR, lacI, jmjC, sapC, hlyD, marR, marR, ridA, araC, lysR, marR, iclR, lacI, frmB, sapC, fadR, xylA, xylB, lacI, fahA, hppD, ccmA, folE, arsH, arsC, arsC, sigJ, iclR, acnA, lysR, lacI, bluB, arsR, acrB, tolC, marR, lacI, lysR, mreB, tadE, tadG, cydX, cyd…		RegX3, phoB	2023-02-15	0.6324655772930224			Soil from military shooting range	1319841	South Korea: Jeollanam-do, Jangseong-gun	Single cell	circular	353017065	1267844061	South Korea,Jeollanam-do,Jangseong-gun			Alphaproteobacteria (28211)	Sphingomonadaceae (41297)	Novosphingobium (165696)	Novosphingobium humi	Sphingomonadales (204457)	Pseudomonadota (1224)	Novosphingobium_humi (2282397)		Bacteria (2)	71184616	-3968454	GCF_028607105.1	63.7	non-mob	non-mob	0	2
NZ_CP117780.1	591164	66.7	0	0	0	399	5	59	0	0	0	0	0	0	araC, acdS, lrp, doxX, fabG, epsG, fkbM, tnp, fabD, fabD, tssM, icmH, icmH, tssK, tssJ, tssG, tssF, tssC, tssB, impA, sulP, sctE, espA, espA, sctF, sctI, sctJ, esaK, sctW, sctD, sctQ, sctR, sctT, ipgC, eseG, ydcF, mbtH, lysR, hlyD, marR, maoC, lysM, lysR, fghA, frmR, yjbQ, bcmE, parA, luxR, zwf, cydB, ubiD, marR, lysR, araC, lysR, impA, tssB, tssC, tssF, tssG, tssH, tssJ, tssK, icmH, tssM, pxpA, …		phoB, RegX3	2023-02-10	0.6665443091933879			soil sample	591164	Japan	soil sample	circular	365748441	1392394179	Japan			Betaproteobacteria (28216)	Burkholderiaceae (119060)	Burkholderia (32008)	Burkholderia sp. FERM BP-3421	Burkholderiales (80840)	Pseudomonadota (1224)	Burkholderia_sp._FERM_BP-3421 (1494466)		Bacteria (2)	6031848	-37082682	GCF_028657905.1	67.7	MOBP	mobilizable	0	2
NZ_CP117882.1	1327038	62.8	1	0	0	1115	0	63	0	0	0	0	0	0	gntR, madL, madM, nodT, cobT, cobS, cbiB, cobU, nagA, gntR, tetR, rutB, rutC, rutD, rutA, qseC, mgtC, thuA, rhtA, fliJ, cDA1, iclR, hapK, gntR, lysR, gntR, lysR, lysR, lysR, fadR, merR, hipA, lacI, jmjC, sapC, hlyD, marR, marR, ridA, araC, araC, lysR, marR, iclR, lacI, frmB, sapC, fadR, xylA, xylB, lacI, lysR, luxR, fahA, hppD, brkB, ccmA, folE, iclR, acnA, iclR, rraA, luxR, lacI, ydcF, bluB, lac…		phoA, RegX3, phoB	2023-02-21	0.6279488605450635			soil	1327038	South Korea: Jeollanam-do, Jangseong-gun	Single cell	circular	353017065	1267844061	South Korea,Jeollanam-do,Jangseong-gun			Alphaproteobacteria (28211)	Sphingomonadaceae (41297)	Novosphingobium (165696)	Novosphingobium sp. KACC 22771	Sphingomonadales (204457)	Pseudomonadota (1224)	Novosphingobium_sp._KACC_22771 (3025670)		Bacteria (2)	7068636	-38357975	GCF_028736195.1	63.3	non-mob	non-mob	0	3
NZ_CP118267.1	634148	54.1	0	0	0	649	1	54	0	0	0	0	0	0	ddpC, nikE, fhuE, fetB, fetA, dinB, cybB, lysR, bla, yafY, marR, rskA, fAS1, grpB, marR, eamA, adeC, adeB, iclR, ccmA, araH, yvrE, yiaK, uhpC, xylB, ulaD, sgaU, araD, umuC, arsR, yqhC, lysR, lysR, lysR, map, yaiC, yybR, yciT, ascG, ascF, ssuC, yicS, clcA, lysR, ydcZ, umuC, parA, yubB, fliT, ycgZ, umuC, tetR, namA, arsC, ariR, ycgZ, lysR, gamL, recT, afaD, lysR, mocR, gabT, gabP, yhjC, lysR, rluF,…	phoP, ugpC	RegX3, phoB, ugpC, ugpC	2023-05-24	0.5409636236335997			soil	634148	China: Lijiang	cell culture	circular	268595868	1002249797	China,Lijiang			Gammaproteobacteria (1236)	Erwiniaceae (1903409)	Pantoea (53335)	Pantoea sp. Lij88	Enterobacterales (91347)	Pseudomonadota (1224)	Pantoea_sp._Lij88 (3028622)		Bacteria (2)	2420253	13030609	GCF_030062155.1	55.8	MOBF	mobilizable	2	4
NZ_CP118268.1	159984	53.7	0	0	0	134	0	7	0	0	0	0	0	0	arnA, arnD, arnT, arnE, arnF, tauD, araC, ssuD, ssuD, sfnB, sfnB, feoB, feoA, yajD, ibpB, ycgF, repA, parB, ptsG2, scrR, aroQ, uvrA, citM, alsS, budA, ynfL, yiaT, fabF, luxR, hlyD, luxR, lacI, arnB, arnC		phoB	2023-05-24	0.5365349034903489			soil	159984	China: Lijiang	cell culture	circular	268595868	1002249797	China,Lijiang			Gammaproteobacteria (1236)	Erwiniaceae (1903409)	Pantoea (53335)	Pantoea sp. Lij88	Enterobacterales (91347)	Pseudomonadota (1224)	Pantoea_sp._Lij88 (3028622)		Bacteria (2)	-11667349	5860374	GCF_030062155.1	55.8	MOBF	mobilizable	0	1
NZ_CP118575.1	378325	65.7	1	0	0	423	3	116	0	0	0	0	0	0	istB, istA, pqqD, gntR, dapF, parA, eccE, whiB1, mngR, dciA, ftsK, tpgA2, trnL, istA, istB, istA, phzF, mbtH, cspC, istA, istB, istB, istA, istA, whiB, istA, istA, istB, istA, fkbM, istB, parA, ltrA, irrE, istA, istB		phoB	2023-03-03	0.6571254873455362	Illicium verum		soil	378325	China: Yulin, Guangxi	Soil	linear	22601309	1107883362	China,Yulin,Guangxi			Actinomycetes (1760)	Streptomycetaceae (2062)	Streptomyces (1883)	Streptomyces sp. WZ-12	Kitasatosporales (85011)	Actinomycetota (201174)	Streptomyces_sp._WZ-12 (3030210)		Bacteria (2)	73252826	-30039058	GCF_028898845.1	71.7	non-mob	non-mob	0	1
NZ_CP118630.1	708540	57.5	0	0	0	666	3	40	0	0	0	0	0	0	repA, parA, ssuD, ssuD, caiA, deoR, rimL, lysE, gntR, rbsB, mglA, araH, araH, araB, ridA, araC, fepB, fepD, cvaA, gntR, mviM, ugpA, ugpE, glnQ, hisM, hisM, hisJ, ridA, iclR, zigA, trmR, tetR, cof, gGDEF, osmC, mngR, argE, dppC, nikE, ddpX, luxE, yciE, hpxD, lysR, map, tauA, ntrB, tauB, nirB, cobA, lysR, glxA, tnp, tnp, lysR, ygdI, ycgZ, acrR, yoaK, glgX, treY, treZ, yjbJ, marR, proP, gntR, tetR, …	ugpA, ugpE, gcd, ugpE	ugpC, ugpC, gcd, ugpE, ugpC, phoB, ugpC	2023-03-07	0.5750486916758405			soil	708540	Hong Kong: Telegraph Bay	Pure isolate	circular	22265251	114130075				Gammaproteobacteria (1236)	Erwiniaceae (1903409)	Pantoea (53335)	Pantoea dispersa	Enterobacterales (91347)	Pseudomonadota (1224)	Pantoea_dispersa (59814)		Bacteria (2)	235291	1.20449e+16	GCF_028993655.1	57.6	MOBF	mobilizable	4	7
NZ_CP118934.1	99281	38.9	1	0	0	128	1	34	0	0	0	0	1	0	yddG, frmR, fghA, gldA, tnp, tnp, tnp, vbhA, hipA, tnp, tnsE, tatA, tatB, tatC, tnp, tnp, trnN, lysM, copG, parB, marR, repM, tnp, tnp, istA, istB, cobT, tnp, lysR		phoA	2023-03-09	0.3889565979391827			soil	99281	Hong Kong: Pineapple Dam	Pure isolate	circular	2238455095	11414407797				Gammaproteobacteria (1236)	Moraxellaceae (468)	Acinetobacter (469)	Acinetobacter pittii	Moraxellales (2887326)	Pseudomonadota (1224)	Acinetobacter_pittii (48296)		Bacteria (2)	11738476	-8578827	GCF_029025705.1	38.8	non-mob	non-mob	0	1
NZ_CP119567.1	900497	59.8	0	0	0	802	0	41	0	0	0	0	0	0	repA, repB, ctRNA_p42d, repC, phnX, lysR, rbsB, mglA, nolG, pstS, corA, nicR, potA, marR, mobA, lysR, lamB, gntR, potC, potD, cDA1, cobW, gntR, hisM, glnQ, marR, mviM, ugpA, ugpE, ugpB, rpiR, hipB, bioA, potE, cydX, sufI, potB, potC, potA, tdh, norM, luxR, rfbA, rfbC, rfbB, rfbD, degT, eryC1, luxR, wecB, wecC, lhgO, cueR, copZ, cyoD, cyoC, cyoB, cyoA, asnC, gntR, ehuA, ehuB, ehuC, ehuD, eutA, eut…	phnX, pstS, ugpA, ugpE, ugpB, ugpB, ugpE, ugpC, ugpE, ugpA	pstS, ugpC, ugpC, ugpC, ugpB, ugpC, ugpC, nrdE, nrdE, nrdF, ugpC, ugpC, phoP, ugpC	2023-03-21	0.5979820032715267			soil	900497	China: Tibet Autonomous Region, Zhu Village, Banbar County, Qamdo City	cell culture	circular	31004939	949268861	China, Tibet, Chamdo City, Banbar County,Dowa			Alphaproteobacteria (28211)	Rhizobiaceae (82115)	Pararhizobium (1612611)	Pararhizobium sp. T808	Hyphomicrobiales (356)	Pseudomonadota (1224)	Pararhizobium_sp._T808 (3031126)		Bacteria (2)	6716751	-4165692	GCF_029277445.1	60.3	MOBQ	mobilizable	10	14
NZ_CP119568.1	615005	58.4	4	0	3	652	8	135	0	0	0	0	0	1	yidB, tctB, parD, relB, hxlR, zwf, araC, celF, glpR, ugpB, ugpA, ugpE, tkt, potA, luxR, cspC, ar35, Atu_At1, yjiS, ar14, sRAP, ligD, xth, suhB, ar15, araC, ydfG, virD4, traD, traC, traA, traF, csgD, lysR, repA, repB, ctRNA_p42d, repC, maoC, ugpE, ugpB, iclR, aspT, deoR, pncB, mnmC, lprI, glgA, glgX, cspC, ggt, ddaH, tetR, abrB, ugpE, gntR, lysR, fur, znuB, araC, pobA, pcaF, atoA, iclR, lysR, aldA…	ugpB, ugpA, ugpE, ugpE, ugpB, ugpE	ugpC, ugpC, ugpC, ugpC, ugpC, ugpC, phoR	2023-03-21	0.5835432232258274			soil	615005	China: Tibet Autonomous Region, Zhu Village, Banbar County, Qamdo City	cell culture	circular	31004939	949268861	China, Tibet, Chamdo City, Banbar County,Dowa			Alphaproteobacteria (28211)	Rhizobiaceae (82115)	Pararhizobium (1612611)	Pararhizobium sp. T808	Hyphomicrobiales (356)	Pseudomonadota (1224)	Pararhizobium_sp._T808 (3031126)		Bacteria (2)	690308	-4366306	GCF_029277445.1	60.3	MOBQ	mobilizable	6	7
NZ_CP119973.1	449449	58.1	0	0	0	454	2	56	0	0	0	0	0	0	iclR, marR, lysR, lysR, dsbA, ar15, suhB, istB, istA, iclR, ycjP, rraA, uhpC, dapA, purR, gntR, lacI, msbA, lysR, luxR, luxR, ggt, gntR, iclR, iclR, moaF, lysR, iclR, hpaI, hpaH, gabD, hpaD, hpaE, moaF, pvcC, trbI, ugpA, ugpE, thuA, lacI, flgA, ltnD, otnK, otnI, pdxA, traR, traM, traH, repA, repB, ctRNA_p42d, repC, purU, vapC, istB, hxsC, hxsB, rpfG, cheA, cheW2, cheW1, ar15, marR, avhB2, virB3, …	ugpA, ugpE	ugpC, ugpC, ugpC	2023-08-08	0.5813006592516615			soil	449449	China: Nanning	pure culture	circular	228211654	1083159756	China,Nanning			Alphaproteobacteria (28211)	Rhizobiaceae (82115)	Agrobacterium (357)	Agrobacterium leguminum	Hyphomicrobiales (356)	Pseudomonadota (1224)	Agrobacterium_leguminum (2792015)		Bacteria (2)	65971	-49260025	GCF_030643885.1	59.9	MOBQ	mobilizable	2	3
NZ_CP120357.1	300219	66.6	0	0	0	321	1	110	0	0	0	0	0	0	maoC, maoC, istB, istA, vbhA, espG, ftsK, moxR, whiB, pilZ, grpE, lpqS, blaI, luxR, lgt, gnd, eamA, uspA, cadA, copA, istB, istA, arsR, merR, arsB, arsR, arsD, arsA, lspA, cadA, arsR, copY, resC, resB, ccsB, lnt, copC, dsbA, ctaD, xerD, parA, arsR, copG, luxR, uspA		gnd, phoP	2023-03-30	0.665544152768479			petroleum contaminated soil	300219	China	single cell	circular	344118455	860326902	China			Actinomycetes (1760)	Nocardiaceae (85025)	Rhodococcus (1827)	Rhodococcus rhodochrous	Mycobacteriales (85007)	Actinomycetota (201174)	Rhodococcus_rhodochrous (1829)		Bacteria (2)	70816946	-2349577	GCF_029457455.1	68.2	non-mob	non-mob	0	2
NZ_CP120362.1	236282	62.0	0	0	0	251	2	47	0	0	0	0	0	0	lysR, marR, lysR, ugpC, lysR, tctB, luxR, traR, trbI, trbH, trbG, trbF, trbL, trbJ, trbE, trbD, trbC, trbB, repA, repB, repC, tniB, tniQ, vapC, scpB, hpaH, hpaD, hpaE, hpaR, hpaD, istB, tniQ, tniB, ugpC, gntR, tniQ, tniB, dsrE, ftsH, tniQ, tniB, lysR, tctB, lysR, cerR, hlyD, marR, marR, cydB, argG, darT, ardC, traG, traD, traC, traA, traF, traB	ugpC, ugpC	ugpC	2023-03-30	0.6201149473933689			petroleum contaminated soil	236282	China	single cell	circular	344118455	860326902	China			Alphaproteobacteria (28211)	Phyllobacteriaceae (69277)	Chelativorans (449972)	Chelativorans sp. AA-79	Hyphomicrobiales (356)	Pseudomonadota (1224)	Chelativorans_sp._AA-79 (3028735)		Bacteria (2)	7114147	-4453882	GCF_029457495.1	64.0	MOBQ	mobilizable	2	1
NZ_CP120363.1	219481	62.3	0	0	0	228	0	28	0	0	0	0	0	0	yubB, marR, mucR, imuA, dinB, copZ, gntR, tniB, tniQ, repB, repA, lysR, lysR, tctB, tctB, vbhA, sbcD, tnpB, tniB, tniQ, tnpB, iS285, hlyD, lysR, scpB, tniQ, tniB, tniQ, tniB, tniQ, repC, ctRNA_p42d, repB, repA, fkbM, traL, virB3, virB4, yifL, virB6, virB8, virB9, virB11, traA, mobC, parA, copG		ugpC	2023-03-30	0.6230425412678091			petroleum contaminated soil	219481	China	single cell	circular	344118455	860326902	China			Alphaproteobacteria (28211)	Phyllobacteriaceae (69277)	Chelativorans (449972)	Chelativorans sp. AA-79	Hyphomicrobiales (356)	Pseudomonadota (1224)	Chelativorans_sp._AA-79 (3028735)		Bacteria (2)	70151687	-43847976	GCF_029457495.1	64.0	MOBQ	mobilizable	0	1
NZ_CP121273.1	136212	65.3	0	0	0	170	0	36	0	0	0	0	0	0	lnt, ccsB, arsR, frmR, tetR, tnp, istA, istB, gntR, brkB, copG, xerD, ccmA, parA, parB, arsR, lnt, ccsB, arsR, frmR, tetR, tnp, istA, istB, gntR, brkB, copG, xerD, ccmA, parA, parB, arsR		phoP, phoP	2023-04-11	0.6526150412592135			soil	136212	China: Hefei		circular	318228094	1172218033	China,Hefei			Actinomycetes (1760)	Microbacteriaceae (85023)	Microbacterium (33882)	Microbacterium proteolyticum	Micrococcales (85006)	Actinomycetota (201174)	Microbacterium_proteolyticum (1572644)		Bacteria (2)	6.65198e+16	-2524128	GCF_029639405.1	70.5	non-mob	non-mob	0	2
NZ_CP121309.1	1736931	62.8	4	0	3	1556	3	68	0	0	0	0	0	0	repA, repB, ctRNA_p42d, repC, crp, tctA, tctB, tctC, rsuA, ampC, acyC, gstA, lysR, lytT, lytS, lytS, ialB, rutF, arsR, yndB, lysR, yajL, Atu_At1, ydfG, gstA, yghU, terC, adhE, lysR, rpoE, fecR, fepA, iucA, iucA, menE, acpP, ycjR, acyC, menH, aceE, acd, lrp, oppF, selA, iclR, ridA, dppC, dppB, ddpA, racX, lysR, ycaC, fucP, lrp, lysR, yciW, ybjT, qdoI, iscR, nlpD, rhtB, gGDEF, adaB, bDS1, asmA, arp…	ugpE, ugpA, ugpB, ugpE, ugpA, ugpB, phnP, ugpB, ugpA, ugpE, ugpA, ugpE, ugpB, ugpA, ugpE, ugpB, phnN, phnM, phnE, phnE, phnD, phnC, phnD, ugpE, ugpA, ugpB, phnF, phnG, phnH, phnI, phnJ, phnK, phnL, ugpE, ugpA, ugpB, ugpB, ugpA, ugpE, ugpB, ugpE, ugpA, ugpB, ugpA, ugpE	gntK, pckG, phoB, phnN, phnM, phnE, phnE, phnD, phnC, phoB, ugpC, ugpE, ugpA, ugpB, phoB, ugpC, phoB, phoB, phnG, phnH, phnI, phnJ, phnK, phnL, phoB, nrdE, nrdE, nrdF, phoB, phoB	2023-04-12	0.6280047969666037			soil	1736931	China:Yinchuan	bacterial colony	circular	384852037	1062261926	China,Yinchuan			Alphaproteobacteria (28211)	Rhizobiaceae (82115)	Ensifer (106591)	Ensifer adhaerens	Hyphomicrobiales (356)	Pseudomonadota (1224)	Ensifer_adhaerens (106592)		Bacteria (2)	6804845299999990	-4169853	GCF_029674665.1	62.8	MOBQ	mobilizable	45	30
NZ_CP121764.1	431692	65.3	2	0	0	442	0	146	0	0	0	0	0	0	maoC, tetR, padR, lepB, gntR, mobF, traM, prgI, lysR, eamA, lysR, tetR, ccmA, erm(46), crcB, iclR, luxR, pfkB, trnC, ilvA, hisC, trpB, trpA, gntR, acs, gntR, benE, luxR, trnI, marR, nrdH, terD, terD, stiP, terD, terD, terB, terD, lysR, lysE, rhaI, lacI, soxR, pcp, iclR, luxR, copG, bla, merR, copG, pfkB, cadA, arsR, terC		purH, adk, phoB	2023-06-25	0.6527408430084412			soil	431692	China	soil	circular	344118455	860326902	China			Actinomycetes (1760)	Nocardiaceae (85025)	Prescottella (2979332)	Prescottella equi	Mycobacteriales (85007)	Actinomycetota (201174)	Prescottella_equi (43767)		Bacteria (2)	68434367	-1794546	GCF_030324145.1	68.7	non-mob	non-mob	0	3
NZ_CP123001.1	916660	60.3	1	0	0	852	0	49	0	0	0	0	0	0	repA, repB, repC, lysR, livK, livH, livG, livF, tctC, thiM, lysR, ccmA, rbsC, ycjR, mviM, bglB, metP, eda, yebE, lysR, lysR, ar45, speD, treA, malK, ugpE, lacI, pepT, ccmA, glcD, ilvB, ilvB, adhE, fabG, ssuD, gntR, ssuD, ycgM, gtdA, iclR, potC, potB, potA, speB, lysR, secD, doxX, trnL, ugpE, lysR, dapA, uRH1, dppB, dppC, oppF, iclR, potD, potB, potC, gabT, hipB, panC, panB, araC, cysD, cysN, cyoD…	ugpE, ugpE, ugpC, ugpC, ugpE	phoP, ugpC, ugpC, ugpC, ugpC, ugpC, ugpC, ugpC, ugpC, ugpC, ugpC, ugpC, ugpC	2023-04-24	0.6034102066196845			petroleum contaminated soil	916660	China: Yan 'an City, Shaanxi Province	single cell	circular	3.65854e+16	1094828549	China, Shaanxi,Yan'An			Alphaproteobacteria (28211)	Rhizobiaceae (82115)	Neorhizobium (1525371)	Neorhizobium petrolearium	Hyphomicrobiales (356)	Pseudomonadota (1224)	Neorhizobium_petrolearium (515361)		Bacteria (2)	6766033599999990	-45258346	GCF_029854435.1	60.8	MOBQ	mobilizable	5	13
NZ_CP125990.1	579146	32.9	1	0	0	502	12	61	0	2	0	0	0	0	tnpB, apeA, tnp, ycaP, pgpB, pseC, pseG, pseH, pseI, dcm, hfq, rimL, adcA, tnp, solG, dltA, solG, tnpB, gerAC, gerAB, gerAA, vanR-A, vanS-Pt, vanZ, eda, kduI, kduD, galM, galK, galT, xerS, cDA1, qdoI, lytD, eamA, gntR, tnp, rimI, acrR, ampS, tetR, bceA, tnp, grsT, sfp, solG, dltA, copY, tnp, tnp, ampC, adcA, motB, yxdL, graR, herA, prgI, tnpB, recU, recU, gspF, gspF, cpaB, traM, traG, tnp, tnpB, …		phoP, spoT	2023-05-25	0.3287202190811988			soil	579146	Namibia: Etosha	cell culture	circular	-188556	163293				Bacilli (91061)	Bacillaceae (186817)	Bacillus (1386)	Bacillus cereus	Bacillales (1385)	Bacillota (1239)	Bacillus_cereus (1396)		Bacteria (2)	-23918908	-46147003	GCF_030067855.1	35.5	MOBL	mobilizable	0	2
NZ_CP126517.1	298452	32.8	0	0	0	265	5	32	0	1	0	0	0	0	tnpB, ftsK, aimR, traM, traM, virB4, merR, copG, copG, hfq, hfq, vanR, lolD, cotJC, tdh, sspA, mauE, mauE, czcR, xerS, hisG, modA, padR, tnp, tnp, arsC, arsB, gloA, arsR, tetR, gerQC, gerQB, gerQA, tnpB, ybjQ, katE, citB, spaA, rocF, bsrC, carD, abrB, gntR		phoB, phoP	2023-06-06	0.3280996609169984			warm, humid forested area with dark clay soil, about 15 cm from the trunk of an Encino tree (Quercus glaucoides (5 cm deep))	298452	Mexico: Tepoztlan, Morelos	bacterial isolate	circular	18.99	-99.11				Bacilli (91061)	Bacillaceae (186817)	Bacillus (1386)	Bacillus toyonensis	Bacillales (1385)	Bacillota (1239)	Bacillus_toyonensis (155322)		Bacteria (2)	-23086638	-4656032	GCF_030166995.1	35.4	MOBL	mobilizable	0	2
NZ_CP126522.1	314645	33.1	0	0	0	261	6	26	0	0	0	0	0	0	yjcZ, ftsN, ftsK, aimR, traM, traM, virB4, merR, copG, copG, ykvA, mutT, vanR, lolD, rimI, czcR, hemA, xerS, hisG, modA, lysE, dinB, iclR, iclR, mepA, arsC, arsB, gloA, arsR, spoIVCA, araC, padC, gerQC, gerQB, gerQA, tnpB, ybjQ, katE, citB, spaA, rocF, bsrC, carD, abrB, gntR		phoB, phoP	2023-06-06	0.3307314592636145			soil in warm, humid forested area with dark clay soils (5 cm deep)	314645	Mexico: Tepoztlan, Morelos	bacterial isolate	circular	18.97	-99.08				Bacilli (91061)	Bacillaceae (186817)	Bacillus (1386)	Bacillus toyonensis	Bacillales (1385)	Bacillota (1239)	Bacillus_toyonensis (155322)		Bacteria (2)	-23154693	-4704668	GCF_030167035.1	35.4	MOBL	mobilizable	0	2
NZ_CP126528.1	290368	32.9	0	0	0	242	3	26	0	1	0	0	0	0	rocF, bsrC, carD, abrB, padR, mutT, ftsK, lysE, tnp, ftsN, tnpB, ftsK, aimR, traM, traM, virB4, merR, copG, hfq, deoR, yajL, hfq, vanR, lolD, rimI, czcR, hemA, xerS, cdiI, lysE, trmB, marR, tetR, gerQC, gerQB, gerQA, tnpB, ybjQ, katE, citB, spaA		phoB, phoP	2023-06-06	0.3288206689442363			semidesertic area with dry sandy soils, around 15 cm from the trunk of a lemon tree (5 cm deep)	290368	Mexico: Tehuacan, Puebla	bacterial isolate	circular	18.46	-97.4				Bacilli (91061)	Bacillaceae (186817)	Bacillus (1386)	Bacillus toyonensis	Bacillales (1385)	Bacillota (1239)	Bacillus_toyonensis (155322)		Bacteria (2)	-23027048	-4687408400000000	GCF_030167055.1	35.5	MOBL	mobilizable	0	2
NZ_CP126529.1	274876	32.2	0	0	0	286	4	38	0	0	0	0	0	0	marR, merR, trbC, tcpC, gndA, gntP, gntK, gntR, traM, traM, orfB, RAGATH-18, recU, recU, arpU, tnpB, esxA, tnp, mutT, folE, queE, queD, queC, lmbE, rodA, pseI, pseH, pseG, pseC, tar, tnpB, bglC, ftsN, tnpB, abfB, iolB, fba, iolE, iolD, iolA3, iolC, iolG, narK, purR, terS, tnpB, ubiE, yesE, gloB, cxxC, rsfA, tnp, rimL, yxeA, ftsK, tnpB		gnd, gntK, phoB, phoR	2023-06-06	0.321599557618708			semidesertic area with dry sandy soils, around 15 cm from the trunk of a lemon tree (5 cm deep)	274876	Mexico: Tehuacan, Puebla	bacterial isolate	circular	18.46	-97.4				Bacilli (91061)	Bacillaceae (186817)	Bacillus (1386)	Bacillus toyonensis	Bacillales (1385)	Bacillota (1239)	Bacillus_toyonensis (155322)		Bacteria (2)	-2300252	-4660657	GCF_030167055.1	35.5	MOBL	mobilizable	0	4
NZ_CP126903.1	352975	65.5	0	0	0	362	4	78	0	0	0	0	0	0	tetR, ccdA, copY, lgt, arfB, ripA, blaI, lpqS, mdtH, walR, ripB, Ms_IGR-7, tnpC, araC, cadA, bssS, eccCa, espG, eccB, eccD, mycP, eccE, ftsK, ubiC, traM, prgI, eccA, kfrA, xerC, mobF, nrdH, ligD, vapC, thsA, copG, copG, ubiE, arsR, cadA, arsB, arsR, xerD, xerC, tnsA, tniQ, tniQ, lppS, copC, cyoC, copY, ctaD, ccsB, cadA, arsR, arfB, ripA, copY, ripB, istB, istA, arsR, istA, tra5, dsbE, blaI, htpX,…		phoP, phoP, phoB	2023-09-21	0.6546639280402294			soil	352975	USA	cell culture	circular	397837304	-1004458825	USA			Actinomycetes (1760)	Mycobacteriaceae (1762)	Mycolicibacterium (1866885)	Mycolicibacterium vanbaalenii	Mycobacteriales (85007)	Actinomycetota (201174)	Mycolicibacterium_vanbaalenii (110539)		Bacteria (2)	7063894	-2539951	GCF_031599035.1	67.9	non-mob	non-mob	0	3
NZ_CP127878.1	76270	33.7	1	0	0	93	3	25	0	0	0	0	0	0	ybjG, corA, ftsW, ykoY, eamA, nikE, nikD, nikC, nikB, nikA, trnV, yckC, rli23, gntB, eamA, yxeA		phoA	2023-06-23	0.3371574668939294			soil	76270	Hong Kong: Telegraph Bay	Single bacterial isolate	circular	222636491	1141304524				Bacilli (91061)	Bacillaceae (186817)	Priestia (2800373)	Priestia megaterium	Bacillales (1385)	Bacillota (1239)	Priestia_megaterium (1404)		Bacteria (2)	-0.7335520000000001	-4733083000000000	GCF_030291715.1	38.3	MOBL	mobilizable	0	1
NZ_CP128105.1	151749	33.0	0	0	0	140	2	19	0	1	0	0	0	0	azoR, gatD, murT, ybjQ, tnpB, katE, tnpB, repC, tnp, ftsK, umuC, ltrA, xRE, ybjQ, cbaT, grpB, tnp		phoP	2023-06-23	0.3301570356312068			grassland soil	151749	Denmark: Jaegersborg Dyrehave	bacterial isolate	circular	55.78	12.55				Bacilli (91061)	Bacillaceae (186817)	Bacillus (1386)	Bacillus cereus	Bacillales (1385)	Bacillota (1239)	Bacillus_cereus (1396)		Bacteria (2)	-2265126	-46801276	GCF_030291955.1	35.6	MOBL	mobilizable	0	1
NZ_CP128127.1	299194	34.2	2	0	0	295	7	58	0	0	0	0	0	0	cls, marR, tnp, padR, eamA, ycaC, yvrH, marR, lysR, tnp, tnp, ykgJ, tetR, tnpA, trnI, dltA, yfkO, trnI, ftsK, ompR, ccmA, yozG, tnp, hemK, gntR, lsa, ncr1575, hxlR, tauE, dinB, tnp, yunG, proB, proC, traM, merR, traM, merR, tnpA, asnC, tnp, tetR, yunG, bla, arsR, tnp, ydaF, spoIVCA, tnpR, splA, splB, tnp		phoB	2023-06-23	0.3418283789113418			pine forrest soil between two spruce trees	299194	Germany: near Munchenroda, Jena	bacterial isolate	circular	50.91	11.52				Bacilli (91061)	Bacillaceae (186817)	Bacillus (1386)	Bacillus cereus	Bacillales (1385)	Bacillota (1239)	Bacillus_cereus (1396)		Bacteria (2)	-22054965	-4682418	GCA_030292095.1	35.7	MOBL	mobilizable	0	1
NZ_CP128135.1	399038	33.7	0	0	0	401	3	70	0	1	0	0	0	0	solG, dltA, tnp, tnp, comEC, arpU, recU, cpaF, resD, yoaR, recU, nosD, abrB, tnpB, kptA, yqcG, tnp, dnaK, essC, essB, yukD, essA, esaA, mobL, copG, fadR, merR, tnp, yfkO, colA, pqqD, czcR, hfq, abrB, hfq, colA, tnp, yvaK, mrsE, tnp, umuC, ftsK, lanKC, tnp, ushA, yxeA, ampC, ftsN, padR, recU, arpU, ydiK, tnp, pseC, pseG, pseH, pseI, yajC, padR, ytrA, ytrB, xerS, tnp, sdaC, sdaAA, sdaAB, hblB, hblD…		dut, phoB, phoB	2023-06-23	0.3370205343851964			field soil	399038	Germany: Heida	bacterial isolate	circular	50.72	10.91				Bacilli (91061)	Bacillaceae (186817)	Bacillus (1386)	Bacillus mycoides	Bacillales (1385)	Bacillota (1239)	Bacillus_mycoides (1405)		Bacteria (2)	-21589687	-46091223	GCF_030292205.1	35.5	MOBL	mobilizable	0	3
NZ_CP128136.1	278261	33.0	0	0	0	294	5	34	0	0	0	0	0	0	ybfO, lepB, yhfH, ftsK, tnp, tnpB, repC, aimR, traM, traM, virB4, merR, copG, tnp, mutT, copG, tnp, malK, ybjQ, tnp, araC, adhE, padR, acrA, lolD, salY, queD, queE, folE, nrdD, nrdG, ric, skfB, tnpB, potE, tdcB, ald, tnpB, ybjQ, hecA, tnp, tnp, bsrC, cdnL, tnp, tnp, sulP, dltC, orfB, spoII, tnpB, tnp		ugpC, nrdD	2023-06-23	0.3296293767362296			field soil	278261	Germany: Heida	bacterial isolate	circular	50.72	10.91				Bacilli (91061)	Bacillaceae (186817)	Bacillus (1386)	Bacillus mycoides	Bacillales (1385)	Bacillota (1239)	Bacillus_mycoides (1405)		Bacteria (2)	-22687778	-4682750700000000	GCF_030292205.1	35.5	MOBL	mobilizable	0	2
NZ_CP128141.1	368432	33.7	0	0	0	362	2	63	0	1	0	0	0	0	essC, essB, yukD, essA, esaA, mobL, fadR, merR, tnp, yfkO, colA, pqqD, tnp, tnp, ftsK, yxeA, lanKC, tnp, ushA, yxeA, ampC, ftsN, padR, recU, arpU, ydiK, tnp, pseC, pseG, pseH, pseI, yajC, padR, ytrA, ytrB, xerS, tnp, tnp, sdaC, sdaAA, sdaAB, hblB, hblD, hblC, tnpB, rocF, tnpB, solG, dltA, tnp, tnp, tnp, comEC, arpU, recU, cpaF, resD, yoaR, recU, nosD, abrB, kptA, yqcG, tnp, dnaK		phoB, dut, phoB	2023-06-23	0.337484257610631			field soil	368432	Germany: Heida	bacterial isolate	circular	50.72	10.91				Bacilli (91061)	Bacillaceae (186817)	Bacillus (1386)	Bacillus mycoides	Bacillales (1385)	Bacillota (1239)	Bacillus_mycoides (1405)		Bacteria (2)	-21580863	-460556	GCF_030292115.1	35.5	MOBL	mobilizable	0	3
NZ_CP128143.1	435352	33.6	0	0	0	434	1	74	0	1	0	0	0	0	solG, dltA, tnp, comEC, arpU, recU, cpaF, resD, yoaR, bclA, czcR, tnp, recU, nosD, abrB, spaA, tnpB, dnaK, essC, essB, yukD, essA, esaA, mobL, copG, fadR, merR, yfkO, colA, pqqD, czcR, hfq, abrB, hfq, colA, eamA, arsN1, arsB, arsC, arsD, arsA, tnp, mutT, yvaK, mrsE, tnp, umuC, ftsK, lanKC, tnp, ushA, yxeA, ampC, ftsN, padR, recU, arpU, ydiK, tnp, pseC, pseG, pseH, pseI, yajC, padR, ymaF, tnpB, xe…		dut, dut, phoB, phoB	2023-06-23	0.3364955254598578			field soil	435352	Germany: Heida	bacterial isolate	circular	50.72	10.91				Bacilli (91061)	Bacillaceae (186817)	Bacillus (1386)	Bacillus mycoides	Bacillales (1385)	Bacillota (1239)	Bacillus_mycoides (1405)		Bacteria (2)	-21550035	-4613074299999990	GCF_030292225.1	35.5	MOBL	mobilizable	0	4
NZ_CP128159.1	204807	33.8	0	0	0	211	5	29	0	2	0	0	0	0	mepB, marR, cls, tnp, tnp, papR, tnp, ushA, ybjQ, ycaO, lolD, tnp, phnD, ycaO, ybjQ, splA, splB, ftsK, tnp, tnp, spoII, padR, tnp, cotJC, bsrC, araC, asnC, ydfG	phnD	pgtP	2023-06-23	0.3384698765178924			field soil	204807	Germany: Heida	bacterial isolate	circular	50.72	10.91				Bacilli (91061)	Bacillaceae (186817)	Bacillus (1386)	Bacillus sp. DX3.1	Bacillales (1385)	Bacillota (1239)	Bacillus_sp._DX3.1 (3052091)		Bacteria (2)	-2.26128e+16	-46990523	GCF_030292155.1	36.4	MOBL	mobilizable	1	1
NZ_CP128493.1	819262	62.1	0	0	0	793	7	154	0	0	0	0	0	0	tctB, maoC, lysR, insE, tnpB, mobF, virD4, copG, istB, istA, hipB, yjbI, tehB, hmpA, sodA, cynT, ahpC, lysR, iscR, cysI, yccC, emrA, tolC, ytoI, marR, metB, pemK, crp, groL, groES, usg, ibpA, nodS, ligD, fabG, pilZ, ardC, spo0J, tonB, htpG, yozE, mltF, srtA, cHASE3, cheR, cheB, rpfG, sGA1, fabG, mviM, fabG, aes, nirD, bfr, brkB, nhaA, osmY, katE, focA, gstA, lpd, ycbB, yliI, atoC, cheY, ytjA, fab…		gdh, phoD	2023-07-01	0.6211968820719135			soil	819262	Spain:Granada	pure cell culture	circular	37183054	-36021928	Spain,Granada			Alphaproteobacteria (28211)	Sphingomonadaceae (41297)	Novosphingobium (165696)	Novosphingobium resinovorum	Sphingomonadales (204457)	Pseudomonadota (1224)	Novosphingobium_resinovorum (158500)		Bacteria (2)	6608065	-36717014	GCF_030369695.1	65.6	MOBQ	mobilizable	0	2
NZ_CP128848.1	69611	54.1	0	0	0	83	2	30	0	0	0	0	0	0	aCT, tilS, dedA, dedA, tauE, tauA, tauC, tauB, norM, rbsK, sulP, cDA1, baeS, arsC, nrdA, eccE, parA, parA, eccE		phoP, nrdA, nrdB, nrdB	2023-07-07	0.5405036560313744			Pear garden topsoil	69611	China:alaer	pure culture	circular	4020310739999990	8050929609999990	China, Xinjiang, Aksu Prefecture, Awat County			Actinomycetes (1760)	Streptomycetaceae (2062)	Streptomyces (1883)	Streptomyces flavofungini	Kitasatosporales (85011)	Actinomycetota (201174)	Streptomyces_flavofungini (68200)		Bacteria (2)	74749775	-28948631	GCF_030388665.1	72.1	non-mob	non-mob	0	4
NZ_CP130326.1	141842	39.7	0	0	0	142	2	15	0	1	0	0	1	0	tnp, hicA, hicB, arsC, arsB, arsH, tnp, bioB, bioA, bioF, bioC, bioD, tnp, qseB, eptA, tnp, tnp, hipA, tdh, lpdA, acoB, acoA, lipA, tnp, tatA, tatB, tatC, phoX, tnp, tnp, dinB, tnp, fucO, tnpB, acnA, merR, repB, tnp, tnp, tnpB, tnpA, isrK, C4, brxC, pglX, pglZ, brxL, iclR, jetD, cadR, czcA	phoX	phoB, phoX	2023-07-25	0.3973576232709634			soil	141842	China: Jiangsu		circular	32.24	119.26				Gammaproteobacteria (1236)	Moraxellaceae (468)	Acinetobacter (469)	Acinetobacter variabilis	Moraxellales (2887326)	Pseudomonadota (1224)	Acinetobacter_variabilis (70346)		Bacteria (2)	0.873604	-8268366	GCF_030518655.1	42.5	non-mob	non-mob	1	2
NZ_CP130611.1	193527	53.5	0	0	0	242	2	58	0	0	0	0	0	0	copG, copC, merR, copZ, dsbG, lgt, cadA, coiA, cdiI, frmR, dmeF, yfeH, soxR, cadA, lspA, lnt, orfA, mntP, qseB, nreB, tnpB, tnsB, tnsA, ompA, trbC, traL, traE, traK, traB, traV, traG, cadR, lspA, lnt, arsB, arsH, arsC, arsR, gap, arsJ, rdgC, parB, repB, ardC, ltrA, kfrA, higA, merA, merF, merF, merP, merT, merR, traH, traG, traM, traN, trbC, traU, traW		phoP, phoB	2023-07-28	0.5350106186733634			soil	193527	China: Wuhan	Cell culture	circular	305941299	1.14298e+16	China,Wuhan			Gammaproteobacteria (1236)	Halomonadaceae (28256)	Halomonas (2745)	Halomonas sp. HAL1	Oceanospirillales (135619)	Pseudomonadota (1224)	Halomonas_sp._HAL1 (550984)		Bacteria (2)	46183276	-24476032	GCF_030544485.1	54.2	MOBH	mobilizable	0	2
NZ_CP130954.1	342121	65.5	0	0	0	328	0	105	0	0	0	0	0	0	exeA, araC, mdlC, dmpG, mhpF, iclR, whiB, porA, iclR, iclR, iclR, marR, ethD, araC, maoC, marR, glcD, doxX, pgi, gnd, zwf, hxlA, hxlB, luxR, irrE, whiB, arsR, maoC, copG, arsR, phoU	phoU	gnd, phoU	2023-08-08	0.6549291040304454			Sod-podzolic soil contaminated with solvents	342121	Belarus: Minsk	cell culture	circular	5389326	276213858				Actinomycetes (1760)	Nocardiaceae (85025)	Rhodococcus (1827)	Rhodococcus opacus	Mycobacteriales (85007)	Actinomycetota (201174)	Rhodococcus_opacus (37919)		Bacteria (2)	70652947	-2365659	GCF_030656675.1	67.2	non-mob	non-mob	1	2
NZ_CP130956.1	1339467	65.1	0	0	0	1304	10	232	0	0	0	0	0	0	phoU, attH, lysR, ethA, tetR, proP, mmsB, adhE, caiB, lysR, marR, tetR, fabG, pptA, pldB, gloB, acs, araC, acrR, tetR, istA, istB, nmrA, adhE, frmA, ssuD, cypX, fer, nirB, paaJ, acrR, menE, sCP2, adhE, frmA, fadH, kgtP, iclR, mviM, acrR, pntB, pntA, ycbJ, maoC, fabG, fabG, fadM, adhE, frmA, curA, yesE, yrpB, caiD, caiA, tnp, tnp, maoC, fabG, caiA, fabG, paaJ, acrR, yesE, acrR, araJ, araJ, ycbJ, f…	phoU, phoU, phoU	phoU, gnd, ppdK, phoD, phoP, phoU, phoU, purA, ppdK, gnd, phoU	2023-08-08	0.6507916955027634			Sod-podzolic soil contaminated with solvents	1339467	Belarus: Minsk	cell culture	linear	5389326	276213858				Actinomycetes (1760)	Nocardiaceae (85025)	Rhodococcus (1827)	Rhodococcus opacus	Mycobacteriales (85007)	Actinomycetota (201174)	Rhodococcus_opacus (37919)		Bacteria (2)	7037537	-24213414	GCF_030656675.1	67.2	non-mob	non-mob	3	11
NZ_CP131471.1	207111	40.0	0	0	0	243	2	27	0	0	0	0	2	0	tetR, paaI, paaI, tnp, tnp, tnp, pcoB, copA, tnp, tnp, ompR, cadA, copC, copZ, czcC, lysR, cydB, qseB, dsbG, tnsE, tnp, tnp, tnp, tnp, tnp, tnp, vapC, copG, tnp, cynS, copG, acfC, tnp, copG, tnp, tnp, tnp, tnp, higB, brxC, pglX, pglZ, brxL, tnp, tnp, tnp, tnp, tnp, tnp, merR, tnp, tnp, merR, merP, merC, merA, merD, merE, copG, repM, irrE, hicB, tnp, tnp, ureE, ureF, ureG, ureD, ureA, ureB, ureC, …		phoB, phoB	2023-08-10	0.4002298284494788			mining soil	207111	China: Zijin gold and copper mine	single cell	circular	236306226	1151845453	China,Zijin			Gammaproteobacteria (1236)	Moraxellaceae (468)	Acinetobacter (469)	Acinetobacter junii	Moraxellales (2887326)	Pseudomonadota (1224)	Acinetobacter_junii (40215)		Bacteria (2)	0.99131864	-8299878	GCF_030665425.1	38.8	non-mob	non-mob	0	2
NZ_CP131925.1	444014	32.9	0	0	0	453	10	60	0	0	0	0	0	0	vanR, lolD, mgtE, ftsW, mgtA, tnpC, fadH2, hfq, arsR, abrB, hfq, hfq, dinB, frmA, fghA, gshB, mauE, mauE, ftsW, mgtE, nAGPA, ftsN, phoP, xerS, sepF, hhoA, mmuM, mmuP, czcR, tnpB, ftsK, splB, splA, ymfJ, mmpL, ahpD, yfbU, arpU, dut, yqaJ, fbpA, tnp, bsrC, cdnL, czcR, arsR, bsrC, cdnL, arsR, deoR, hfq, eamA, satA, asnB, acrR, yesE, gloB, cxxC, arpU, gerPA, copG, fbpA, mutT, tnp, rsfA, pseC, dinB, f…	phoP	phoB, phoB, phoB, phoR, dut, phoP, spoT	2023-08-11	0.3293792538073123			soil	444014	Russia	whole organism	linear	646863136	977453061	Russia			Bacilli (91061)	Bacillaceae (186817)	Bacillus (1386)	Bacillus mycoides	Bacillales (1385)	Bacillota (1239)	Bacillus_mycoides (1405)		Bacteria (2)	-21438603	-4601498	GCF_030704245.1	35.6	MOBL	mobilizable	1	7
NZ_CP132066.1	523960	33.2	0	0	0	490	9	76	0	0	0	0	0	0	xerS, mutT, phoP, ftsN, nAGPA, mgtE, ftsW, bsh, manC, araC, hfq, tctB, abrB, arsR, tnpB, tnpB, rocF, grsT, solG, dltA, ampC, hfq, fadH2, tnpC, mgtA, ftsW, mgtE, tar, lolD, vanR, pseI, pseH, pseG, pseC, tnp, ltrA, tnp, tnp, ltrA, ftsI, rpoE, traM, traG, ftsK, dinB, pseC, rsfA, tnp, mutT, fbpA, gerPA, arpU, cxxC, gloB, yesE, acrR, asnB, fxsT, tnp, eamA, hfq, deoR, arsR, cdnL, bsrC, arsR, czcR, cdnL…	phoP	phoB, phoB, phoP, dut, phoR, phoB	2023-08-16	0.3317352469654172			soil	523960	Russia	whole organism	linear	646863136	977453061	Russia			Bacilli (91061)	Bacillaceae (186817)	Bacillus (1386)	Bacillus mycoides	Bacillales (1385)	Bacillota (1239)	Bacillus_mycoides (1405)		Bacteria (2)	-21366081	-4603936	GCF_030718825.1	35.6	MOBL	mobilizable	1	6
NZ_CP132067.1	209282	36.5	0	0	0	212	6	45	0	0	0	0	1	0	ltrA, iclR, ltrA, tnp, tnp, tnp, tnp, iseA, tnp, ltrA, tnp		phoB	2023-08-16	0.3646801922764499			soil	209282	Russia	whole organism	linear	646863136	977453061	Russia	rep3_3_rep(pBT9727), CP000047,		Bacilli (91061)	Bacillaceae (186817)	Bacillus (1386)	Bacillus mycoides	Bacillales (1385)	Bacillota (1239)	Bacillus_mycoides (1405)		Bacteria (2)	-23959584	-499946	GCF_030718825.1	35.6	MOBL	mobilizable	0	1
NZ_CP134198.1	514023	60.4	1	0	0	549	14	153	0	0	0	0	0	0	yciE, cinA, tdh, cotJC, nodU, yghA, abaF, dnaJ, tnpB, asnC, cheY, cspD, parB, glxR, pyk, amiD, insO, glxR, fmdB, yhcG, ydiF, trbM, stbB, virD4, pnuC, virB11, virB9, virB6, virB5, virB4, virB3, virB2, pdeR, xerC, xerC, marR, lysE, mdtA, ttgC, czcR, tra8, lysR, istB, istB, istB, tra8, lysR, tnp, yncE, yncE, tonB, exbD, yncE, tnpB, tetR, araC, benC, tetR, bpoC, imuA, imuB, xerC, parB, klcA, kfrA, mb…		pstS, pstS, pyk	2023-09-21	0.6044671152847246			Rhizosphere soil of Tomato	514023	South Korea: Busan	single cell	circular	351799528	1290752365	South Korea,Busan			Betaproteobacteria (28216)	Burkholderiaceae (119060)	Paraburkholderia (1822464)	Paraburkholderia sp. FT54	Burkholderiales (80840)	Pseudomonadota (1224)	Paraburkholderia_sp._FT54 (3074437)		Bacteria (2)	56063643	-3489144	GCF_031585635.1	62.7	MOBQ	mobilizable	0	3
NZ_CP135141.1	56226	39.1	0	0	0	61	2	16	0	1	0	0	1	0	sufI, tatA, tatB, tatC, mqsA, terC, yqhA, qatC, qatD, mqsA, nhaA, mqsA, copG, cpaE, brnT, lgt, ompR		phoB	2023-10-04	0.3910290612883719			sediment soil	56226	South Korea: Gumi	sediment soil	circular	361195513	1283444692	South Korea,Gumi			Gammaproteobacteria (1236)	Moraxellaceae (468)	Moraxella (475)	Moraxella sp. 1 DOX410	Moraxellales (2887326)	Pseudomonadota (1224)	Moraxella_sp._1_DOX410 (3076087)		Bacteria (2)	4651445	11378843	GCA_032248735.1	44.0	non-mob	non-mob	0	1
NZ_CP136373.1	542178	33.4	0	0	0	501	13	68	0	0	0	0	0	0	xerS, mutT, phoP, ftsN, nAGPA, mgtE, ftsW, bsh, manC, araC, hfq, tctB, abrB, arsR, tnpB, tnpB, rocF, grsT, solG, dltA, ampC, hfq, fadH2, tnpC, mgtA, ftsW, mgtE, lolD, vanR, pseI, pseH, pseG, pseC, tnp, arpU, ltrA, tnp, ltrA, herA, prgI, yicC, tnpA, gspF, gspF, cpaB, traM, traG, ltrA, ftsK, dinB, pseC, rsfA, tnp, mutT, fbpA, gerPA, arpU, cxxC, gloB, yesE, acrR, asnB, tnp, eamA, hfq, deoR, cdnL, bs…	phoP	phoB, phoB, phoP, dut, phoR, phoB	2023-10-19	0.3341928296611076			soil	542178	Russia	whole organism	circular	646863136	977453061	Russia			Bacilli (91061)	Bacillaceae (186817)	Bacillus (1386)	Bacillus mycoides	Bacillales (1385)	Bacillota (1239)	Bacillus_mycoides (1405)		Bacteria (2)	-21325395	-4597272	GCF_032681085.1	35.6	MOBL	mobilizable	1	6
NZ_CP136382.1	444433	33.0	0	0	0	449	10	58	0	0	0	0	0	0	acrR, asnB, satA, eamA, hfq, deoR, arsR, cdnL, bsrC, arsR, czcR, cdnL, bsrC, tnp, fbpA, yqaJ, dut, arpU, yfbU, ahpD, mmpL, ymfJ, splB, ftsK, tnpB, czcR, mmuP, mmuM, hhoA, sepF, xerS, phoP, ftsN, nAGPA, mgtE, ftsW, mauE, mauE, gshB, fghA, frmA, dinB, hfq, hfq, abrB, arsR, hfq, fadH2, tnpC, mgtA, ftsW, mgtE, lolD, vanR, pseI, pseH, pseG, pseC, tnp, arpU, tnp, tnp, traM, traG, ftsK, dinB, pseC, rsfA…	phoP	spoT, phoP, dut, phoR, phoB, phoB, phoB	2023-10-19	0.3296717390472805			soil	444433	Russia	whole organism	circular	646863136	977453061	Russia			Bacilli (91061)	Bacillaceae (186817)	Bacillus (1386)	Bacillus mycoides	Bacillales (1385)	Bacillota (1239)	Bacillus_mycoides (1405)		Bacteria (2)	-2.12117e+16	-4601057	GCF_032681105.1	35.6	MOBL	mobilizable	1	7
NZ_CP136383.1	165122	33.4	0	0	0	144	0	19	0	0	0	0	0	0	ybjQ, gatD, murT, katE, ybjQ, hfq, copG, copG, merR, virB4, traM, traM, aimR, ftsK, umuC, prsA, yfnA		phoP	2023-10-19	0.3335291481450079			soil	165122	Russia	whole organism	circular	646863136	977453061	Russia			Bacilli (91061)	Bacillaceae (186817)	Bacillus (1386)	Bacillus mycoides	Bacillales (1385)	Bacillota (1239)	Bacillus_mycoides (1405)		Bacteria (2)	-22656815	-4674095	GCF_032681105.1	35.6	MOBL	mobilizable	0	1
NZ_KY940428.1	236312	34.2	1	0	0	223	1	20	0	0	0	0	0	0	rsfA, fbpB, cdiI, dnaN, ltrA, ltrA, traG, tubZ, tubR, tnpB, tnpB, tnp, tnp, cpaB, gspF, gspF, RAGATH-18, recU, yhfH, tnp, yicC, prgI, ltrA, traG, abrB, lacI, arsR, spoIVCA, ydeE, spoIVCA, tnp, istB, araC, yozG, cls, trnR, spoVAC, spoVAD, spoVAE, ycaP, clpP, frmA, fghA, gshB, gerAC, fbpB, hfq		phoB	2020-06-03	0.3422932394461559			soil	236312	India		circular	20009515	6442206039999990	India			Bacilli (91061)	Bacillaceae (186817)	Bacillus (1386)	Bacillus sp. (in: firmicutes)	Bacillales (1385)	Bacillota (1239)	Bacillus_sp._(in:_firmicutes) (1409)		Bacteria (2)	-20149727	-497431	Record suppressed	NA	MOBL	mobilizable	0	1
NZ_LR594669.1	478848	67.0	0	0	0	471	0	21	0	0	0	0	0	0	repB, xerD, fabG, moeB, fabG, kdgR, ntaB, ntaB, gltC, estB, kstR2, kstR2, lptB, kstR2, lptB, ethD, fabL, fixJ, shlB, fecR, rspA, sugC, ycjO, sugB, vraS, ydbC, yecS, artQ, glnQ, betI, paaJ, yhfP, xerC, tpsB, yecD, fabG, tcuA, argH, yecS, speB, yofA, lhgO, yxeP, ssuC, cmpD, yafL, bbsF, slyA, bbsF, kdgR, lptB, livK, mcbR, glnQ, tcyB, yecS, yghU, gltC, acuI, cmpD, ssuC, gdhA, ddpA, yohD, fabG, pdaA, …	phnN, phnE, phnD, phnC, phnL, phnK, phnI, phnH, phnG, phnF, phnN	ugpC, gnl, ugpC, phnE, phnD, phnC, phnM, phnL, phnK, phnJ, phnI, phnG, phnN	2020-01-09	0.6697156508954825			linuron-contaminated soil	478848	Denmark		linear	562097954	93000769	Denmark			Betaproteobacteria (28216)	Comamonadaceae (80864)	Variovorax (34072)	Variovorax sp. SRS16	Burkholderiales (80840)	Pseudomonadota (1224)	Variovorax_sp._SRS16 (282217)		Bacteria (2)	6618017	-3832448	GCF_901827165.1	67.2	non-mob	non-mob	11	13
NZ_LR594673.1	553014	67.1	0	0	0	548	0	14	0	0	0	0	0	0	parA, parB, vapC, xerC, pcaK, kdgR, maoC, cusF, gltC, uvrY, slyA, tsaM1, allS, yqjF, kstR2, kstR2, lptB, kstR2, lptB, ethD, fabL, fixJ, copG, shlB, fecR, rspA, sugC, ycjO, sugB, vraS, ydbC, yecS, artQ, glnQ, potA, cysW, potB, cofE, cofC, cofD, cofG, npdG, yjiA, betI, paaJ, yhfP, xerC, yecD, fabG, tcuA, argH, yecS, speB, yofA, lhgO, ygjV, yafL, bbsF, slyA, bbsF, lptB, livK, mcbR, yghU, gltC, acuI,…	phnE, phnD, phnC, phnL, phnK, phnI, phnH, phnG, phnF, phnN, ugpC	ugpC, gnl, ugpC, phnE, phnD, phnC, phnM, phnL, phnK, phnJ, phnI, phnG, phnN, ugpC	2020-01-09	0.6709631220909417			linuron-contaminated soil	553014	Denmark		linear	562097954	93000769	Denmark			Betaproteobacteria (28216)	Comamonadaceae (80864)	Variovorax (34072)	Variovorax sp. PBL-E5	Burkholderiales (80840)	Pseudomonadota (1224)	Variovorax_sp._PBL-E5 (434014)		Bacteria (2)	6558108	-38416245	GCF_901827185.1	67.3	non-mob	non-mob	11	14
NZ_LR594690.1	816468	62.5	43	1	0	889	0	366	0	0	0	0	0	0	kfrA, dinG, traA, traL, traE, traK, traB, traV, traC, traH, traG, pilP, mshL, pilX, trnfM, secB, recA, prpE, trnfM, secB, trnL, trnT, trnR, trnV, trnT, trnR, trnK, trnK, trnH, trnS, trnS, trnV, trnN, trnA, trnT, trnC, trnA, trnL, trnP, trnP, trnI, trnP, trnF, trnK, trnQ, trnW, trnF, trnL, trnL, trnW, trnS, trnL, trnG, trnI, trnQ, trnY, trnS, trnG, trnY, trnG, yiaA, virB4, radA, traN, trbC, traU, …		phoP, thyA	2020-01-09	0.6246490983112627			linuron-contaminated soil	816468	Belgium		linear	50.77	5.16				Betaproteobacteria (28216)	Comamonadaceae (80864)	Variovorax (34072)	Variovorax sp. WDL1	Burkholderiales (80840)	Pseudomonadota (1224)	Variovorax_sp._WDL1 (207745)		Bacteria (2)	5331583999999990	-30036328	GCF_901846895.1	67.2	MOBP	mobilizable	0	2
NZ_LR594691.1	565873	63.5	28	0	0	576	0	180	0	0	0	0	0	0	kfrA, dotC, icmT, efpA, slmA, tolA, kfrA, traW, lprI, trnR, trnL, trnV, trnK, trnM, trnL, trnH, trnI, trnN, trnR, trnC, trnG, trnY, trnR, trnS, trnS, trnS, trnF, trnD, trnA, trnS, trnP, trnQ, trnE, trnT, trnW, trnL, trnG, trbK, xseA, bvgA, relA, cpdA, kfrA, mmsB, cynR, fabG, nlhH, carC, yijE, siaT, siaP, cynR, eamA, kfrA, czcC, cusB, czcD, czcA, czcB, czcC, czcI, eptA, copR, czcA, czcB, czcC, czc…		phoP, gnd, gnd, gnd, thyA, tmk, tmk	2020-01-09	0.6353687134745782			linuron-contaminated soil	565873	Belgium		linear	50.77	5.16				Betaproteobacteria (28216)	Comamonadaceae (80864)	Variovorax (34072)	Variovorax sp. WDL1	Burkholderiales (80840)	Pseudomonadota (1224)	Variovorax_sp._WDL1 (207745)		Bacteria (2)	58284535	-32668078	GCF_901846895.1	67.2	MOBP	mobilizable	0	7
NZ_LR723671.1	227935	59.1	0	0	0	219	2	21	0	0	0	0	1	0	tnpB, prpD, iclR, iclR, fixA, pyc, rraA, spoIVCA, araJ, emrA, marR, thiC, istA, istB, trbL, uspA, tnp, hdeD, gltS, emrA, rbbA, yadH, adhP, yfcC, arcA, argF, arcC, uspA, ar14, argG, ardC, slyX, traG, traD, traC, traA, traF, Atu_Ti1, traH, hipB, virB10, trbH, trbG, trbF, trbL, trbK, trbJ, virB4, trbD, trbC, trbB, repA, repB, ctRNA_p42d, repC, vbhA, vapC, abiH, tnp, tnp, lysR, ehuB, ehuC, ehuD, ehuA…		ugpC	2019-10-10	0.5912782152806721			Paddy soil under the long-term application of triazophos insecticide	227935	China		circular	344118455	860326902	China			Alphaproteobacteria (28211)	Rhizobiaceae (82115)	Pseudorhizobium (1903858)	Pseudorhizobium flavum	Hyphomicrobiales (356)	Pseudomonadota (1224)	Pseudorhizobium_flavum (1335061)		Bacteria (2)	66690645	-475574	Record suppressed	NA	MOBQ	mobilizable	0	1
NZ_LR723672.1	206959	60.4	0	0	0	221	3	35	0	0	0	0	0	0	repA, repB, ctRNA_p42d, repC, traG, traA, tauE, bigR, blh, qseC, qseB, dsbD, xerD, trbL, tnp, coxB, ctaD, merR, trbI, lnt, lspA, dsbB, ftsI, psiB, tnp, nosL, lgt, tnpB, tnp, tnpR, merR, arsR, copZ, lspA, merR2, merT, merP2, merA, ompR, yceK, sufI, yncE, yfcC, argF, arcC, rbbA, ftsH, cls, ldhA, lysR, copZ, cueR, nirK, sdhD, sdhC, petA, sduA, istB, ardC		phoP	2019-10-10	0.6039891959276958			Paddy soil under the long-term application of triazophos insecticide	206959	China		circular	344118455	860326902	China			Alphaproteobacteria (28211)	Rhizobiaceae (82115)	Pseudorhizobium (1903858)	Pseudorhizobium flavum	Hyphomicrobiales (356)	Pseudomonadota (1224)	Pseudorhizobium_flavum (1335061)		Bacteria (2)	6748391000000000	-4824811	Record suppressed	NA	MOBQ	mobilizable	0	1
NZ_LR723673.1	150934	60.1	0	0	0	150	0	21	0	0	0	0	0	0	gorA, csa3, csa3, parA, traA, tnpA, prpD, insO, acrR, ibpA, ardC, vapC, himA, traG, traD, traC, traA, traF, Atu_Ti1, traH, csgD, tnp, paaB, fixA, pcaF, paaH, badH, badI, marR, virB10, trbH, trbG, trbF, trbL, trbK, trbJ, trbE, trbC, trbB, repA, repB, ctRNA_p42d, repC, hutD, hutU, hutG, hutH, hutI, hutC, yfcC, argH, lysR, vapC, fadR, glcG, glcF		ugpC	2019-10-10	0.6012164257225012			Paddy soil under the long-term application of triazophos insecticide	150934	China		circular	344118455	860326902	China			Alphaproteobacteria (28211)	Rhizobiaceae (82115)	Pseudorhizobium (1903858)	Pseudorhizobium flavum	Hyphomicrobiales (356)	Pseudomonadota (1224)	Pseudorhizobium_flavum (1335061)		Bacteria (2)	6715214	-4830394999999990	Record suppressed	NA	MOBQ	mobilizable	0	1

## Sheet: Table S3
Table S3. Genomic annotation, phosphorus content, mobility, and host predictions for plasmids identified from soil metagenomes
seq_name	sample_id	length	GC	tRNAs	tmRNAs	rRNAs	CDSs	pseudogenes	hypotheticals	signal_peptides	sORFs	gaps	oriCs	oriVs	oriTs	Bakta_genes	P-acquisition_genes_bakta	P_genes_plasme	P_genes_genomad	P-acquisition_genes_final	P_gene_count	class	mobility	soil_type	Phosphorus_availability	Host_predictor_family	Host_predictor_phylum	Bacterial_host_count
k127_1818394	ERR3200795	14537	67.1	0	0	0	15	0	0	0	0	0	0	0	0	phnK, phnJ, phnI, phnH, phnG, gntR, phnM, phnN, phnX, phnT	phnK, phnJ, phnI, phnH, phnG, phnM, phnN, phnX, phnT		phnL, phnK, phnJ, phnI, phnH, phnG, phnF, phnM, phnN, phnN, phnX, phnS, phnU, phnV	phnL, phnK, phnJ, phnI, phnH, phnG, phnF, phnM, phnN, phnN, phnX, phnS, phnU, phnV	14	non-mob	non-mob	Mine	Low	Acetobacteraceae, Aeromonadaceae, Comamonadaceae, Deinococcaceae, Hafniaceae, Methylobacteriaceae, Microbacteriaceae, Micrococcaceae, Mycobacteriaceae, Nocardiaceae, Paracoccaceae, Pseudomonadaceae, Streptomycetaceae, Xanthomonadaceae	Actinobacteria, Deinococcus-Thermus, Pseudomonadota	3
k127_1320802	ERR3200795	30273	55.6	0	0	0	33	1	7	0	0	0	0	0	0	rcnA, proP, kdgT, crfC, phnA, yjdN, phnC, phnD, phnE, phnF, phnG, phnH, phnI, phnJ, phnK, phnL, phnM, phnN, phnO, phnP, alsA, alsC, alsE, alsK	phnC, phnD, phnE, phnF, phnG, phnH, phnI, phnJ, phnK, phnL, phnM, phnN, phnO, phnP		phnC, phnD, phnE, phnF, phnG, phnH, phnI, phnJ, phnK, phnL, phnM, phnN, phnO, phnP	phnC, phnD, phnE, phnF, phnG, phnH, phnI, phnJ, phnK, phnL, phnM, phnN, phnO, phnP	14	MOBF	mobilizable	Mine	Low	Acetobacteraceae, Aeromonadaceae, Bacillaceae, Comamonadaceae, Deinococcaceae, Enterobacteriaceae, Erwiniaceae, Hafniaceae, Haloarculaceae, Haloferacaceae, Morganellaceae, Neisseriaceae, Paracoccaceae, Pasteurellaceae, Piscirickettsiaceae, Pseudomonadaceae, Roseobacteraceae, Vibrionaceae, Xanthomonadaceae, Yersiniaceae	Deinococcus-Thermus, Euryarchaeota, Bacillota, Pseudomonadota	4
k127_2549486	ERR3200803	14895	66.4	0	0	0	16	0	0	0	0	0	0	0	0	dapA, phnM, wbbJ, phnC, phnD, phnE, phnE, phnF, phnG, phnH, phnI, phnJ, phnK, phnL, phnM	phnM, phnC, phnD, phnE, phnE, phnF, phnG, phnH, phnI, phnJ, phnK, phnL, phnM		phnM, phnC, phnE, phnE, phnG, phnH, phnI, phnJ, phnK, phnL, phnM, phnN	phnM, phnC, phnE, phnE, phnG, phnH, phnI, phnJ, phnK, phnL, phnM, phnN	12	MOBQ	mobilizable	Mine	Low	Acetobacteraceae, Aeromonadaceae, Comamonadaceae, Deinococcaceae, Enterobacteriaceae, Hafniaceae, Methylobacteriaceae, Mycobacteriaceae, Paracoccaceae, Pasteurellaceae, Pseudomonadaceae, Streptomycetaceae, Xanthomonadaceae	Actinobacteria, Deinococcus-Thermus, Pseudomonadota	3
k127_70749	ERR3200796	26793	64.2	0	0	0	31	0	3	0	1	0	0	0	0	pqqA, phnN, phnL, phnK, phnJ, phnI, phnH, phnG, phnF, phnE, phnE, phnC, mmsB, mmsA, chvE	phnN, phnL, phnK, phnJ, phnI, phnH, phnG, phnF, phnE, phnE, phnC		phnN, phnM, phnL, phnK, phnJ, phnI, phnH, phnG, phnE, phnE, phnC, phnM	phnN, phnM, phnL, phnK, phnJ, phnI, phnH, phnG, phnE, phnE, phnC, phnM	12	MOBQ	mobilizable	Mine	Low	Acetobacteraceae, Aeromonadaceae, Comamonadaceae, Deinococcaceae, Haloferacaceae, Methylobacteriaceae, Microbacteriaceae, Micrococcaceae, Mycobacteriaceae, Nocardiaceae, Paracoccaceae, Pseudomonadaceae, Roseobacteraceae, Sphingomonadaceae, Streptomycetaceae, Xanthomonadaceae	Actinobacteria, Deinococcus-Thermus, Euryarchaeota, Pseudomonadota	4
k127_3008982	SRR28401900	59660	58.1	0	0	0	57	0	3	0	0	0	0	0	0	melB, celF, melR, proP, phnA, yjdN, phnF, phnG, phnH, phnI, phnJ, phnK, phnL, phnM, phnN, phnP, yjdP, xylG, rbsC, rbsB, rbsK, ompR, fdhF, tPR, gltP, acs, yjcH, actP, fimA, fimA, fimD, cidB, yohJ, lysR, yjcE, nCS2, gstA, sraL, soxR, soxS, yjcC, yjcB, potC, potB, ynjB, malK, elaC, purR, suhB	phnF, phnG, phnH, phnI, phnJ, phnK, phnL, phnM, phnN, phnP		phnF, phnG, phnH, phnI, phnJ, phnK, phnL, phnM, phnN, phnP, phoP, ugpC	phnF, phnG, phnH, phnI, phnJ, phnK, phnL, phnM, phnN, phnP, phoP, ugpC	12	MOBF	mobilizable	Desert	Low	Acetobacteraceae, Aeromonadaceae, Bacillaceae, Comamonadaceae, Deinococcaceae, Enterobacteriaceae, Erwiniaceae, Hafniaceae, Haloarculaceae, Haloferacaceae, Micrococcaceae, Morganellaceae, Neisseriaceae, Paracoccaceae, Pseudomonadaceae, Roseobacteraceae, Vibrionaceae, Xanthomonadaceae, Yersiniaceae	Actinobacteria, Deinococcus-Thermus, Euryarchaeota, Bacillota, Pseudomonadota	5
k127_1809663	ERR3200795	93166	66.4	0	0	0	88	0	5	0	0	0	0	0	0	puuA, puuR, puuC, speB, marR, ycjP, ugpC, iclR, gloB, ompA, hydA, ncs1, preA, lysE, gntR, sulP, doxX, lysR, ahpC, ahpF, higA, mprF, rspR, frc, lysR, lysR, gndA, ltaE, phnL, phnK, phnI, phnH, phnG, phnF, phnN	ugpC, phnL, phnK, phnI, phnH, phnG, phnF, phnN		ugpC, ugpC, gnd, phnM, phnL, phnK, phnJ, phnI, phnH, phnG, phnN, phnN	ugpC, ugpC, gnd, phnM, phnL, phnK, phnJ, phnI, phnH, phnG, phnN, phnN	12	non-mob	non-mob	Mine	Low	Acetobacteraceae, Aeromonadaceae, Azospirillaceae, Bacillaceae, Burkholderiaceae, Comamonadaceae, Deinococcaceae, Hafniaceae, Haloarculaceae, Haloferacaceae, Methylobacteriaceae, Microbacteriaceae, Micrococcaceae, Mycobacteriaceae, Nocardiaceae, Paracoccaceae, Pseudomonadaceae, Roseobacteraceae, Sphingomonadaceae, Streptomycetaceae, Xanthomonadaceae	Actinobacteria, Deinococcus-Thermus, Euryarchaeota, Bacillota, Pseudomonadota	5
k127_342930	ERR3200808	22400	60.4	0	0	0	24	1	2	0	0	0	0	0	0	melB, celF, melR, proP, phnA, yjdN, phnF, phnG, phnI, phnJ, phnK, phnL, phnM, phnN, phnP, xylG	phnF, phnG, phnI, phnJ, phnK, phnL, phnM, phnN, phnP		phnF, phnG, phnH, phnI, phnJ, phnK, phnL, phnM, phnN, phnP	phnF, phnG, phnH, phnI, phnJ, phnK, phnL, phnM, phnN, phnP	10	MOBF	mobilizable	Mine	Low	Acetobacteraceae, Aeromonadaceae, Bacillaceae, Comamonadaceae, Deinococcaceae, Enterobacteriaceae, Erwiniaceae, Hafniaceae, Haloarculaceae, Haloferacaceae, Morganellaceae, Paracoccaceae, Pasteurellaceae, Pseudomonadaceae, Vibrionaceae, Xanthomonadaceae, Yersiniaceae	Deinococcus-Thermus, Euryarchaeota, Bacillota, Pseudomonadota	4
k127_342125	ERR3200808	5782	66.9	0	0	0	8	0	1	0	0	0	0	0	0	phnD, phnE, phnF, phnG, phnH	phnD, phnE, phnF, phnG, phnH		phnC, phnD, phnE, phnF, phnG, phnH, phnI, phnJ	phnC, phnD, phnE, phnF, phnG, phnH, phnI, phnJ	8	non-mob	non-mob	Mine	Low	Acetobacteraceae, Aeromonadaceae, Enterobacteriaceae, Erwiniaceae, Hafniaceae, Morganellaceae, Pasteurellaceae, Pseudomonadaceae	Pseudomonadota	1
k127_1798704	ERR3200796	19239	65.4	0	0	0	23	0	4	0	0	0	0	0	0	phnM, phnN, phnL, gsiA, phnI, phnH, phnG, phnC	phnM, phnN, phnL, phnI, phnH, phnG, phnC		phnM, phnL, phnK, phnJ, phnI, phnE, phnE, phnC	phnM, phnL, phnK, phnJ, phnI, phnE, phnE, phnC	8	non-mob	non-mob	Mine	Low	Acetobacteraceae, Methylobacteriaceae, Microbacteriaceae, Mycobacteriaceae, Nocardiaceae, Paracoccaceae, Pseudomonadaceae, Roseobacteraceae, Streptomycetaceae	Actinobacteria, Pseudomonadota	2
k127_3989513	SRR28401900	211401	58.6	2	0	0	189	0	8	0	1	0	0	0	0	tssF, tssG, tssJ, tssE, tssA1, rbsB, ychF, pth, ychH, soxR, dauA, prs, ispE, lolB, hemA, prfA, prmC, sirB2, sirB1, kdsA, chaA, chaB, chaC2, dsrE, tauA, ntrB, tauB, nirB, bfd, narX, narX, narK, narZ, narH, narJ, narI, rhaT, lrp, trnY, trnY, purU, ychJ, rssA, rssB, galU, hns, tdk, adhE, marC, oppA, oppB, oppC, oppD, oppF, yciU, clsA, yciY, yceI, yciI, tonB, fN3K, ghoS, pfkB, ydiY, thrS, thrS, pheM,…		prsA, prsA, prsA, lysR, pps, pyk, ugpC, ugpC		prsA, prsA, prsA, lysR, pps, pyk, ugpC, ugpC	8	MOBF	mobilizable	Desert	Low	Acetobacteraceae, Aeromonadaceae, Burkholderiaceae, Comamonadaceae, Deinococcaceae, Enterobacteriaceae, Erwiniaceae, Hafniaceae, Haloarculaceae, Haloferacaceae, Morganellaceae, Neisseriaceae, Paracoccaceae, Pseudomonadaceae, Roseobacteraceae, Vibrionaceae, Xanthomonadaceae, Yersiniaceae	Deinococcus-Thermus, Euryarchaeota, Pseudomonadota	3
k127_4463829	SRR28285613	6654	64.4	0	0	0	7	0	1	0	0	0	0	0	0	phnC, phnD, phnE, phnE, phnG	phnC, phnD, phnE, phnE, phnG		phnM, phnC, phnE, phnE, phnG, phnH	phnM, phnC, phnE, phnE, phnG, phnH	6	MOBQ	mobilizable	Grassland	Low	Pasteurellaceae	Pseudomonadota	1
k127_1220789	SRR28401902	13601	58.9	0	0	0	14	0	1	0	0	0	0	0	0	eamA, phnP, phnN, phnL, phnK, phnJ, phnH, phnG, phnE	phnP, phnN, phnL, phnK, phnJ, phnH, phnG, phnE	phnN, phnL, phnK, phnJ, phnI, phnE		phnN, phnL, phnK, phnJ, phnI, phnE	6	MOBH	mobilizable	Desert	Low	Acetobacteraceae, Aeromonadaceae, Bacillaceae, Comamonadaceae, Deinococcaceae, Enterobacteriaceae, Erwiniaceae, Hafniaceae, Haloarculaceae, Haloferacaceae, Methylobacteriaceae, Micrococcaceae, Morganellaceae, Neisseriaceae, Paracoccaceae, Pasteurellaceae, Pseudomonadaceae, Roseobacteraceae, Vibrionaceae, Xanthomonadaceae, Yersiniaceae	Actinobacteria, Deinococcus-Thermus, Euryarchaeota, Bacillota, Pseudomonadota	5
k127_1764940	ERR3200796	57733	61.7	0	0	0	50	1	1	0	0	0	0	0	0	hpaR, hpaD, lysR, alkB, atuA, ppc, otnK, otnI, ltnD, lysR, leuB			phnC, phnD_phosphite, ptxC, ptxD, gnl, ppc	phnC, phnD_phosphite, ptxC, ptxD, gnl, ppc	6	MOBQ	mobilizable	Mine	Low	Acetobacteraceae, Aeromonadaceae, Bacillaceae, Comamonadaceae, Deinococcaceae, Haloarculaceae, Haloferacaceae, Methylobacteriaceae, Microbacteriaceae, Micrococcaceae, Mycobacteriaceae, Nocardiaceae, Paracoccaceae, Pseudomonadaceae, Roseobacteraceae, Sphingomonadaceae, Streptomycetaceae, Xanthomonadaceae	Actinobacteria, Deinococcus-Thermus, Euryarchaeota, Bacillota, Pseudomonadota	5
k127_2017872	ERR3200803	34701	65.4	0	0	0	39	0	11	0	0	0	0	0	0	ugpE, ugpC, ugpA, ugpA, ugpE, ubiU, ubiV	ugpE, ugpC, ugpA, ugpA, ugpE		ugpB, ugpA, ugpE, ugpC, ugpA, ugpE	ugpB, ugpA, ugpE, ugpC, ugpA, ugpE	6	MOBQ	mobilizable	Mine	Low	Acetobacteraceae, Aeromonadaceae, Bacillaceae, Burkholderiaceae, Comamonadaceae, Deinococcaceae, Hafniaceae, Haloarculaceae, Haloferacaceae, Methylobacteriaceae, Microbacteriaceae, Micrococcaceae, Mycobacteriaceae, Nocardiaceae, Paracoccaceae, Pseudomonadaceae, Roseobacteraceae, Sphingomonadaceae, Streptomycetaceae, Xanthomonadaceae	Actinobacteria, Deinococcus-Thermus, Euryarchaeota, Bacillota, Pseudomonadota	5
k127_197778	ERR3200808	4145	59.9	0	0	0	4	0	0	0	0	0	0	0	0	phnU, phnT, phnS, phnR	phnU, phnT, phnS	phnV, phnU, phnT, phnS, phnR		phnV, phnU, phnT, phnS, phnR	5	MOBF	mobilizable	Mine	Low			0
k127_2899568	SRR28285609	7062	64.3	0	0	0	6	0	0	0	0	0	0	0	0	msrR, phoU, pstA	phoU, pstA	phoU, phoU, pstS, pstC, pstA		phoU, phoU, pstS, pstC, pstA	5	non-mob	non-mob	Grassland	Low	Pasteurellaceae	Pseudomonadota	1
k127_521219	SRR28401888	3640	58.0	0	0	0	5	1	0	0	0	0	0	0	0	pstA	pstA	pstB, pstA, pstA, pstC, pstS		pstB, pstA, pstA, pstC, pstS	5	MOBQ	mobilizable	Grassland	Low	Pasteurellaceae, Streptococcaceae	Bacillota, Pseudomonadota	2
k127_4263642	SRR28401908	10409	66.7	0	0	0	10	0	1	0	0	0	0	0	0	pstS, pstC, pstA, pstB, phoU, phoB	pstS, pstC, pstA, pstB, phoU, phoB	pstS, pstC, pstA, pstB, phoB		pstS, pstC, pstA, pstB, phoB	5	MOBP	mobilizable	Farmland	High	Acetobacteraceae, Aeromonadaceae, Comamonadaceae, Methylobacteriaceae, Microbacteriaceae, Micrococcaceae, Morganellaceae, Mycobacteriaceae, Nocardiaceae, Paracoccaceae, Pasteurellaceae, Pseudomonadaceae, Streptomycetaceae, Yersiniaceae	Actinobacteria, Pseudomonadota	2
k127_2301777	ERR3200793	3960	59.7	0	0	0	4	0	0	0	0	0	0	0	0	pstC, pstA, pstB, phoU	pstC, pstA, pstB, phoU	pstS, pstC, pstA, pstB, phoU		pstS, pstC, pstA, pstB, phoU	5	MOBQ	mobilizable	Mine	Low	Bacillaceae, Enterobacteriaceae, Erwiniaceae, Hafniaceae, Lactobacillaceae, Morganellaceae, Pasteurellaceae, Pseudomonadaceae, Streptococcaceae	Bacillota, Pseudomonadota	2
k127_1812460	ERR3200796	4373	66.1	0	0	0	6	0	0	0	0	0	0	0	0	phnF, phnG, phnH, phnI, fosX	phnF, phnG, phnH, phnI		phnF, phnG, phnH, phnI, phnJ	phnF, phnG, phnH, phnI, phnJ	5	MOBQ	mobilizable	Mine	Low	Acetobacteraceae, Aeromonadaceae, Enterobacteriaceae, Mycobacteriaceae, Pasteurellaceae, Pseudomonadaceae, Streptomycetaceae, Yersiniaceae	Actinobacteria, Pseudomonadota	2
k127_550237	ERR3200808	10380	57.6	0	0	0	12	0	1	0	0	0	0	0	0	ugpE, ugpC, ugpQ, ggt, yhhY, ryhB, ccmA, mviM, yhhW, gntR, gntK	ugpE, ugpC, ugpQ	ugpE, ugpC, ugpQ, gntK, gntK		ugpE, ugpC, ugpQ, gntK, gntK	5	MOBF	mobilizable	Mine	Low	Acetobacteraceae, Aeromonadaceae, Bacillaceae, Clostridiaceae, Comamonadaceae, Deinococcaceae, Enterobacteriaceae, Erwiniaceae, Hafniaceae, Haloarculaceae, Haloferacaceae, Micrococcaceae, Morganellaceae, Neisseriaceae, Paracoccaceae, Pasteurellaceae, Pseudomonadaceae, Roseobacteraceae, Vibrionaceae, Xanthomonadaceae, Yersiniaceae	Actinobacteria, Deinococcus-Thermus, Euryarchaeota, Bacillota, Pseudomonadota	5
k127_355227	ERR4182668	6381	65.2	0	0	0	5	0	0	0	0	0	0	0	0	pstS, pstA	pstS, pstA	pstS, pstC, pstA, pstB		pstS, pstC, pstA, pstB	4	non-mob	non-mob	Tundra	High			0
k127_863930	SRR28401904	2991	66.0	0	0	0	5	0	2	0	0	0	0	0	0	ugpC, ugpE	ugpC, ugpE		ugpC, ugpE, ugpE, ugpA	ugpC, ugpE, ugpE, ugpA	4	MOBQ	mobilizable	Desert	Low			0
k127_1151311	ERR3200796	6482	69.8	0	0	0	6	0	3	0	0	0	0	0	0	ugpE, ugpA	ugpE, ugpA		ugpC, ugpE, ugpA, ugpB	ugpC, ugpE, ugpA, ugpB	4	non-mob	non-mob	Mine	Low			0
k127_3108111	SRR28401902	3809	67.6	0	0	0	3	0	0	0	0	0	0	0	0	pstA	pstA	pstB, pstA, pstC, pstS		pstB, pstA, pstC, pstS	4	non-mob	non-mob	Desert	Low	Pasteurellaceae	Pseudomonadota	1
k127_672992	SRR28401829	3958	67.6	0	0	0	3	0	0	0	0	0	0	0	0	pstA	pstA	pstS, pstC, pstA, pstB		pstS, pstC, pstA, pstB	4	non-mob	non-mob	Farmland	High	Hafniaceae, Pasteurellaceae	Pseudomonadota	1
k127_4116644	SRR28401906	12461	71.7	2	0	0	9	0	0	0	0	0	0	0	0	trnC, trnN, phnF, phnG, phnI	phnF, phnG, phnI		phnG, phnH, phnI, phnJ	phnG, phnH, phnI, phnJ	4	non-mob	non-mob	Desert	Low	Streptomycetaceae	Actinobacteria	1
k127_3016965	SRR28401906	3021	70.0	0	0	0	5	0	1	0	0	0	0	0	0	phoB, pstB	phoB, pstB	phoB, phoU, pstB, pstA		phoB, phoU, pstB, pstA	4	non-mob	non-mob	Desert	Low	Acetobacteraceae, Aeromonadaceae, Enterobacteriaceae, Microbacteriaceae, Micrococcaceae, Paracoccaceae, Pasteurellaceae, Pseudomonadaceae, Streptomycetaceae, Yersiniaceae	Actinobacteria, Pseudomonadota	2
k127_4580925	SRR28285724	6105	65.8	0	0	0	6	0	0	0	0	0	0	0	0	phoU, pstB, pstA	phoU, pstB, pstA	phoU, pstB, pstA, pstC		phoU, pstB, pstA, pstC	4	MOBQ	mobilizable	Farmland	High	Acetobacteraceae, Aeromonadaceae, Bacillaceae, Comamonadaceae, Hafniaceae, Morganellaceae, Pasteurellaceae, Pseudomonadaceae	Bacillota, Pseudomonadota	2
k127_1850252	ERR3200805	2763	70.0	0	0	0	4	0	1	0	0	0	0	0	0	phoR, phoB, phoU	phoR, phoB, phoU	ppk, phoR, phoB, phoU		ppk, phoR, phoB, phoU	4	non-mob	non-mob	Mine	Low	Acetobacteraceae, Enterobacteriaceae, Pseudomonadaceae, Streptomycetaceae	Actinobacteria, Pseudomonadota	2
k127_2364142	SRR28401903	3952	57.9	0	0	0	5	0	1	0	0	0	0	0	0	phoU, pstB, pstA, pstC	phoU, pstB, pstA, pstC	pstB, pstA, pstC, pstS		pstB, pstA, pstC, pstS	4	MOBB	mobilizable	Desert	Low	Bacillaceae, Clostridiaceae, Enterobacteriaceae, Erwiniaceae, Hafniaceae, Lactobacillaceae, Moraxellaceae, Morganellaceae, Pasteurellaceae, Staphylococcaceae, Streptococcaceae	Bacillota, Pseudomonadota	2
k127_1649926	SRR28401756	3920	65.1	0	0	0	5	0	0	0	0	0	0	0	0	pstC, pstA, pstB	pstC, pstA, pstB	pstS, pstC, pstA, pstB		pstS, pstC, pstA, pstB	4	MOBP	mobilizable	Farmland	High	Acetobacteraceae, Aeromonadaceae, Bacillaceae, Clostridiaceae, Enterobacteriaceae, Erwiniaceae, Hafniaceae, Morganellaceae, Pasteurellaceae, Pseudomonadaceae, Streptococcaceae	Bacillota, Pseudomonadota	2
k127_1495367	ERR3200804	3110	58.3	0	0	0	3	0	0	0	0	0	0	0	0	pstC, pstA	pstC, pstA	pstS, pstC, pstA, pstB		pstS, pstC, pstA, pstB	4	MOBQ	mobilizable	Mine	Low	Pasteurellaceae, Streptococcaceae	Bacillota, Pseudomonadota	2
k127_1668618	ERR3200795	13929	57.0	0	0	0	12	0	0	0	0	0	0	0	0	kduD, araE, purR, sacC, ugpB, malK, ugpE, ugpA, qdoI, racX	ugpB, ugpE, ugpA		ugpC, ugpC, ugpA, lysR	ugpC, ugpC, ugpA, lysR	4	MOBF	mobilizable	Mine	Low	Acetobacteraceae, Aeromonadaceae, Bacillaceae, Comamonadaceae, Enterobacteriaceae, Erwiniaceae, Hafniaceae, Morganellaceae, Neisseriaceae, Pasteurellaceae, Pseudomonadaceae, Streptococcaceae, Vibrionaceae, Xanthomonadaceae, Yersiniaceae	Bacillota, Pseudomonadota	2
k127_1460120	SRR28401901	2766	64.1	0	0	0	5	2	2	0	0	0	0	0	0	phoU, phoB	phoU, phoB		pstB, phoU, phoB, phoB	pstB, phoU, phoB, phoB	4	MOBQ	mobilizable	Desert	Low	Aeromonadaceae, Enterobacteriaceae, Erwiniaceae, Hafniaceae, Micrococcaceae, Morganellaceae, Pasteurellaceae, Pseudomonadaceae, Yersiniaceae	Actinobacteria, Pseudomonadota	2
k127_372892	SRR28401906	2893	61.4	0	0	0	3	0	0	0	0	0	0	0	0	ugpE, ugpA	ugpE, ugpA		ugpC, ugpE, ugpA, ugpB	ugpC, ugpE, ugpA, ugpB	4	MOBQ	mobilizable	Desert	Low	Hafniaceae, Lactobacillaceae, Pasteurellaceae	Bacillota, Pseudomonadota	2
k127_3300914	SRR28285604	6405	63.1	0	0	0	7	0	0	0	0	0	0	0	0	ugpE, ugpA, ugpB, caiB, osmC, marR	ugpE, ugpA, ugpB		ugpC, ugpE, ugpA, ugpB	ugpC, ugpE, ugpA, ugpB	4	MOBQ	mobilizable	Grassland	Low	Acetobacteraceae, Aeromonadaceae, Bacillaceae, Clostridiaceae, Comamonadaceae, Enterobacteriaceae, Erwiniaceae, Hafniaceae, Morganellaceae, Paracoccaceae, Pasteurellaceae, Pseudomonadaceae, Xanthomonadaceae, Yersiniaceae	Bacillota, Pseudomonadota	2
k127_3080458	ERR3200793	21020	64.6	1	0	0	26	0	7	0	0	0	0	0	0	mreD, pstA, pstB, phoU, phoB, rlmB, pilZ, trnL	pstA, pstB, phoU, phoB		pstC, pstB, phoU, phoB	pstC, pstB, phoU, phoB	4	MOBQ	mobilizable	Mine	Low	Acetobacteraceae, Aeromonadaceae, Comamonadaceae, Methylobacteriaceae, Microbacteriaceae, Micrococcaceae, Mycobacteriaceae, Nocardiaceae, Paracoccaceae, Pseudomonadaceae, Roseobacteraceae, Streptomycetaceae	Actinobacteria, Pseudomonadota	2
k127_397603	ERR3200791	3469	61.1	0	0	0	3	0	0	0	0	0	0	0	0	phnE, phnD, phnC	phnE, phnD, phnC		phnE, phnE, phnD, phnC	phnE, phnE, phnD, phnC	4	MOBQ	mobilizable	Mine	Low	Hafniaceae, Lactobacillaceae, Pasteurellaceae, Pseudomonadaceae	Bacillota, Pseudomonadota	2
k127_931466	ERR3200803	4872	63.7	0	0	0	4	0	0	0	0	0	0	0	0	ugpE, ugpA, ugpB	ugpE, ugpA, ugpB		ugpC, ugpE, ugpA, ugpB	ugpC, ugpE, ugpA, ugpB	4	MOBQ	mobilizable	Mine	Low	Acetobacteraceae, Aeromonadaceae, Bacillaceae, Hafniaceae, Pasteurellaceae, Pseudomonadaceae	Bacillota, Pseudomonadota	2
k127_942671	ERR3200795	23722	62.9	0	0	0	32	0	20	0	0	0	0	0	0	pstC, pstA, arsA, vapC	pstC, pstA		pstS, pstC, pstA, pstB	pstS, pstC, pstA, pstB	4	MOBQ	mobilizable	Mine	Low	Acetobacteraceae, Methylobacteriaceae, Microbacteriaceae, Mycobacteriaceae, Nocardiaceae, Pseudomonadaceae, Streptomycetaceae	Actinobacteria, Pseudomonadota	2
k127_131580	ERR4182668	7170	68.6	0	0	0	8	0	0	0	0	0	0	0	0	egtB, phnC, phnE	phnC, phnE		phnD_phosphite, phnC, phnE, phnE	phnD_phosphite, phnC, phnE, phnE	4	non-mob	non-mob	Tundra	High	Pasteurellaceae, Pseudomonadaceae, Streptomycetaceae	Actinobacteria, Pseudomonadota	2
k127_2304989	SRR28401745	7246	64.0	0	0	0	8	0	0	0	0	0	0	0	0	pstS2, pstC, pstA, pstB	pstC, pstA, pstB		pstS, pstC, pstA, pstB	pstS, pstC, pstA, pstB	4	non-mob	non-mob	Farmland	High	Acetobacteraceae, Mycobacteriaceae, Pasteurellaceae, Pseudomonadaceae, Streptomycetaceae, Yersiniaceae	Actinobacteria, Pseudomonadota	2
k127_1328706	ERR3200796	6886	72.6	0	0	0	7	0	1	0	0	0	0	0	0	gsiA, phnI, phnH, phnG, phnF	phnI, phnH, phnG, phnF		phnL, phnK, phnJ, phnI	phnL, phnK, phnJ, phnI	4	non-mob	non-mob	Mine	Low	Acetobacteraceae, Microbacteriaceae, Mycobacteriaceae, Nocardiaceae, Pseudomonadaceae, Streptomycetaceae	Actinobacteria, Pseudomonadota	2
k127_216920	SRR28401892	2916	59.6	0	0	0	4	0	1	0	0	0	0	0	0	pstB, phoU, phoB	pstB, phoU, phoB		pstA, pstB, phoU, phoB	pstA, pstB, phoU, phoB	4	MOBQ	mobilizable	Grassland	Low	Acetobacteraceae, Aeromonadaceae, Bacillaceae, Clostridiaceae, Comamonadaceae, Enterobacteriaceae, Erwiniaceae, Hafniaceae, Lactobacillaceae, Micrococcaceae, Morganellaceae, Paracoccaceae, Pasteurellaceae, Pseudomonadaceae, Yersiniaceae	Actinobacteria, Bacillota, Pseudomonadota	3
k127_73389	ERR3200805	11722	61.7	0	0	0	12	0	0	0	0	0	0	0	0	alkB, lysR, phnE, phnC, hpaD	phnE, phnC		ptxD, ptxC, phnD_phosphite, phnC	ptxD, ptxC, phnD_phosphite, phnC	4	MOBQ	mobilizable	Mine	Low	Acetobacteraceae, Aeromonadaceae, Bacillaceae, Comamonadaceae, Methylobacteriaceae, Microbacteriaceae, Micrococcaceae, Morganellaceae, Mycobacteriaceae, Nocardiaceae, Paracoccaceae, Pasteurellaceae, Pseudomonadaceae, Roseobacteraceae, Streptomycetaceae, Xanthomonadaceae, Yersiniaceae	Actinobacteria, Bacillota, Pseudomonadota	3
k127_259908	SRR11271804	2703	63.7	0	0	0	3	0	0	0	0	0	0	0	0	phnJ, phnK	phnJ, phnK		phnI, phnJ, phnK, phnL	phnI, phnJ, phnK, phnL	4	MOBQ	mobilizable	Volcanic	Low	Acetobacteraceae, Aeromonadaceae, Comamonadaceae, Deinococcaceae, Enterobacteriaceae, Microbacteriaceae, Micrococcaceae, Morganellaceae, Nocardiaceae, Pasteurellaceae, Pseudomonadaceae, Streptomycetaceae, Xanthomonadaceae, Yersiniaceae	Actinobacteria, Deinococcus-Thermus, Pseudomonadota	3
k127_1828729	ERR4182670	4206	57.9	0	0	0	6	0	2	0	0	0	0	0	0	phoB, phoU, pstB	phoB, phoU, pstB		phoB, phoU, pstB, pstA	phoB, phoU, pstB, pstA	4	non-mob	non-mob	Tundra	High	Acetobacteraceae, Aeromonadaceae, Bacillaceae, Comamonadaceae, Enterobacteriaceae, Erwiniaceae, Hafniaceae, Micrococcaceae, Morganellaceae, Paracoccaceae, Pasteurellaceae, Pseudomonadaceae, Yersiniaceae	Actinobacteria, Bacillota, Pseudomonadota	3
k127_620851	ERR4182668	8004	60.6	0	0	0	9	0	1	0	0	0	0	0	0	chrB, pstB, pstA	pstB, pstA		RegX3, pstB, pstA, pstC	RegX3, pstB, pstA, pstC	4	non-mob	non-mob	Tundra	High	Acetobacteraceae, Aeromonadaceae, Bacillaceae, Comamonadaceae, Enterobacteriaceae, Microbacteriaceae, Micrococcaceae, Morganellaceae, Paracoccaceae, Pasteurellaceae, Pseudomonadaceae, Streptomycetaceae, Yersiniaceae	Actinobacteria, Bacillota, Pseudomonadota	3
k127_901996	ERR4182668	29433	66.3	1	0	0	25	0	5	0	0	0	0	0	0	glgB, glgX, rlmB, cdnL, phoU, trnT	phoU	RegX3, SenX3, phoU, tmk		RegX3, SenX3, phoU, tmk	4	non-mob	non-mob	Tundra	High	Acetobacteraceae, Aeromonadaceae, Bacillaceae, Comamonadaceae, Deinococcaceae, Methylobacteriaceae, Microbacteriaceae, Micrococcaceae, Morganellaceae, Mycobacteriaceae, Nocardiaceae, Paracoccaceae, Pseudomonadaceae, Roseobacteraceae, Sphingomonadaceae, Streptomycetaceae, Xanthomonadaceae, Yersiniaceae	Actinobacteria, Deinococcus-Thermus, Bacillota, Pseudomonadota	4
k127_4058003	SRR28401900	112622	56.7	0	0	0	112	0	3	0	1	0	0	0	0	yurZ, tam, araJ, lysR, yrpB, metP, abcC, nlpA, pcbC, manC, araC, araJ, hpxE, hpxD, hpxR, hpxO, pbuX, uraD, uraH, hipB, hipA, yddW, fimA, fimD, fimC, fimA, map, iroE, mtlA2, araJ, celF, ptsG2, mngR, lysR, mmsB, cdaR, glxK, uhpC, yvrE, uhpC, paaJ, fabG, ydiF, menE, gloA, fucP, rbsK, alsE, glpR, deoC, xylB, glpR, araC, glxA, gap, atoC, pgtB, pgtC, pgtP, lysM, tenA, btpA, rbsK, rbsB, mglA, araH, php,…	pgtB, pgtC, pgtP	pgtA, pgtB, pgtC, pgtP	pgtA, pgtB, pgtC, pgtP	pgtA, pgtB, pgtC, pgtP	4	MOBF	mobilizable	Desert	Low	Acetobacteraceae, Aeromonadaceae, Bacillaceae, Burkholderiaceae, Comamonadaceae, Deinococcaceae, Enterobacteriaceae, Erwiniaceae, Hafniaceae, Haloarculaceae, Haloferacaceae, Methylobacteriaceae, Micrococcaceae, Morganellaceae, Neisseriaceae, Paracoccaceae, Pasteurellaceae, Pseudomonadaceae, Roseobacteraceae, Vibrionaceae, Xanthomonadaceae, Yersiniaceae	Actinobacteria, Deinococcus-Thermus, Euryarchaeota, Bacillota, Pseudomonadota	5
k127_664254	ERR3200808	14339	57.6	0	0	0	16	0	3	0	0	0	0	0	0	phnC, ptxB, phnE, ptxD, lysR, xerC	phnC, ptxB, phnE	phnC, ptxB, ptxC, ptxD	phnC, ptxB, ptxC, ptxD	phnC, ptxB, ptxC, ptxD	4	MOBF	mobilizable	Mine	Low	Acetobacteraceae, Aeromonadaceae, Bacillaceae, Burkholderiaceae, Comamonadaceae, Deinococcaceae, Enterobacteriaceae, Erwiniaceae, Hafniaceae, Haloarculaceae, Haloferacaceae, Micrococcaceae, Morganellaceae, Neisseriaceae, Paracoccaceae, Pasteurellaceae, Pseudomonadaceae, Roseobacteraceae, Sphingomonadaceae, Vibrionaceae, Xanthomonadaceae, Yersiniaceae	Actinobacteria, Deinococcus-Thermus, Euryarchaeota, Bacillota, Pseudomonadota	5
[truncated: 1,914 more rows]
